# Supplementary material for: Quantum-chemically-calculated mechanistically interpretable molecular descriptors for drug-action mechanism study – a case study of anthracycline anticancer antibiotics
Source: Royal Society of Chemistry journal article supplement (doi:10.1039/c6ra14630a), 2016-01-01
Supplement: c6ra14630a1.pdf [file c6ra14630a1.pdf]

**Quantum-chemically-calculated mechanistically interpretable molecular descriptors for drug-action mechanism study – a case study of anthracycline anticancer antibiotics**

Siu-Kwong Pang

Institute of Textiles and Clothing, Faculty of Applied Science and Textiles, The Hong Kong Polytechnic University, Hung Hom, Kowloon, Hong Kong.

Email: pangsiukwong@gmail.com

Tel.: +852 94965619

**Supplementary Information**

1. Log GI<sub>50</sub> (60 cell lines) for anthracyclines

| Name                                    | NSC No. / CAS No.       | average Log (GI <sub>50</sub> ) | Experiment 1         |                         |                                                      | Experiment 2         |                         |                                                      | Experiment 3         |                         |                                                      | Experiment 4         |                         |                                                      | Experiment 5         |                         |                                                      | span of log (GI <sub>50</sub> ) |
|-----------------------------------------|-------------------------|---------------------------------|----------------------|-------------------------|------------------------------------------------------|----------------------|-------------------------|------------------------------------------------------|----------------------|-------------------------|------------------------------------------------------|----------------------|-------------------------|------------------------------------------------------|----------------------|-------------------------|------------------------------------------------------|---------------------------------|
|                                         |                         |                                 | GI <sub>50</sub> (M) | Log (GI <sub>50</sub> ) | Log (Highest concentration of drugs for experiments) | GI <sub>50</sub> (M) | Log (GI <sub>50</sub> ) | Log (Highest concentration of drugs for experiments) | GI <sub>50</sub> (M) | Log (GI <sub>50</sub> ) | Log (Highest concentration of drugs for experiments) | GI <sub>50</sub> (M) | Log (GI <sub>50</sub> ) | Log (Highest concentration of drugs for experiments) | GI <sub>50</sub> (M) | Log (GI <sub>50</sub> ) | Log (Highest concentration of drugs for experiments) |                                 |
| 3'-Acetoxy-4'-O-acetyldoxorubicin       | 73113-92-5              | -6.419                          | 3.81E-07             | -6.419                  | -4.0                                                 |                      |                         |                                                      |                      |                         |                                                      |                      |                         |                                                      |                      |                         |                                                      |                                 |
| Aclacinomycin X                         | NSC 670120              | -7.796                          | 1.60E-08             | -7.796                  | -5.0                                                 |                      |                         |                                                      |                      |                         |                                                      |                      |                         |                                                      |                      |                         |                                                      |                                 |
| Aclarubicin                             | 57576-44-0              | -8.233                          | 5.85E-09             | -8.233                  | -5.0                                                 |                      |                         |                                                      |                      |                         |                                                      |                      |                         |                                                      |                      |                         |                                                      |                                 |
| Adriamycin 14-octanoate                 | 51898-39-6              | -7.119                          | 7.60E-08             | -7.119                  | -4.0                                                 |                      |                         |                                                      |                      |                         |                                                      |                      |                         |                                                      |                      |                         |                                                      |                                 |
| Aklavin                                 | 60504-57-6              | -6.701                          | 1.99E-07             | -6.701                  | -4.0                                                 |                      |                         |                                                      |                      |                         |                                                      |                      |                         |                                                      |                      |                         |                                                      |                                 |
| 2'-Bromo-4'-epi-daunorubicin            | NSC 650931              | -7.330                          | 4.02E-08             | -7.396                  | -4.0                                                 | 5.43E-08             | -7.265                  | -5.0                                                 |                      |                         |                                                      |                      |                         |                                                      |                      |                         |                                                      | 0.131                           |
| Cinerubin A                             | NSC 243022 / 34044-10-5 | -9.827                          | 1.49E-10             | -9.827                  | -7.0                                                 |                      |                         |                                                      |                      |                         |                                                      |                      |                         |                                                      |                      |                         |                                                      |                                 |
| N-(1-Cyano-2-methoxyethyl)doxorubicin   | NSC 639659              | -7.138                          | 7.27E-08             | -7.138                  | -4.0                                                 |                      |                         |                                                      |                      |                         |                                                      |                      |                         |                                                      |                      |                         |                                                      |                                 |
| Cyanomorpholino doxorubicin             | 88254-07-3              | -10.198                         | 3.38E-11             | -10.471                 | -7.7                                                 | 1.19E-10             | -9.924                  | -8.0                                                 |                      |                         |                                                      |                      |                         |                                                      |                      |                         |                                                      | 0.547                           |
| Daunomycin 3,4-dichlorobenzoylhydrazone | 66996-54-1              | -6.824                          | 1.50E-07             | -6.824                  | -4.0                                                 |                      |                         |                                                      |                      |                         |                                                      |                      |                         |                                                      |                      |                         |                                                      |                                 |
| Daunomycin 4-nitrobenzoylhydrazone      | 66996-56-3              | -6.500                          | 3.16E-07             | -6.500                  | -4.0                                                 |                      |                         |                                                      |                      |                         |                                                      |                      |                         |                                                      |                      |                         |                                                      |                                 |
| Daunomycin 3-oxime                      | 34610-60-1              | -5.951                          | 1.12E-06             | -5.951                  | -4.0                                                 |                      |                         |                                                      |                      |                         |                                                      |                      |                         |                                                      |                      |                         |                                                      |                                 |

|                                            |                            |        |              |        |      |              |        |      |              |        |      |              |        |      |              |        |      |       |
|--------------------------------------------|----------------------------|--------|--------------|--------|------|--------------|--------|------|--------------|--------|------|--------------|--------|------|--------------|--------|------|-------|
| Daunorubicin /<br>Daunomycin               | 20830-81-3 /<br>23541-50-6 | -7.220 | 3.86E-<br>08 | -7.413 | -4.0 | 1.29E-<br>07 | -6.889 | -3.3 | 4.43E-<br>08 | -7.354 | -4.0 | 5.96E-<br>08 | -7.225 | -4.3 | 8.43E-<br>08 | -7.074 | -5.0 | 0.524 |
| 4-Demethoxy<br>adriamycin /<br>Medorubicin | 64363-63-9                 | -7.706 | 1.97E-<br>08 | -7.706 | -4.0 |              |        |      |              |        |      |              |        |      |              |        |      |       |
| N,N-dibenzyl<br>daunorubicin               | 70878-51-2                 | -5.446 | 1.55E-<br>05 | -4.810 | -4.3 | 8.28E-<br>07 | -6.082 | -5.0 |              |        |      |              |        |      |              |        |      | 1.272 |
| N,N-diethyl<br>adriamycin                  | 70844-09-6                 | -7.260 | 5.49E-<br>08 | -7.260 | -4.0 |              |        |      |              |        |      |              |        |      |              |        |      |       |
| N,N-dimethyl<br>adriamycin                 | 67106-76-7                 | -7.742 | 1.81E-<br>08 | -7.742 | -4.0 |              |        |      |              |        |      |              |        |      |              |        |      |       |
| N,N-dimethyl<br>daunomycin                 | 70095-84-0                 | -8.030 | 2.48E-<br>08 | -7.606 | -5.0 | 3.51E-<br>09 | -8.455 | -8.0 |              |        |      |              |        |      |              |        |      | 0.849 |
| Doxorubicin /<br>Adriamycin                | 25316-40-9 /<br>23214-92-8 | -7.065 | 1.41E-<br>07 | -6.851 | -4.0 | 9.38E-<br>08 | -7.028 | -4.6 | 6.63E-<br>08 | -7.178 | -6.6 | 6.27E-<br>08 | -7.203 | -4.3 |              |        |      | 0.352 |
| Duborimycin                                | NSC 180510                 | -5.941 | 1.18E-<br>06 | -5.928 | -4.0 | 1.11E-<br>06 | -5.955 | -5.0 |              |        |      |              |        |      |              |        |      | 0.027 |
| Epirubicin                                 | 56390-09-1                 | -6.691 | 2.00E-<br>07 | -6.699 | -4.0 | 2.07E-<br>07 | -6.684 | -4.3 |              |        |      |              |        |      |              |        |      | 0.035 |
| Esorubicin                                 | 63950-06-1                 | -7.356 | 4.23E-<br>08 | -7.374 | -3.7 | 4.58E-<br>08 | -7.339 | -5.0 |              |        |      |              |        |      |              |        |      | 0.350 |
| 11-Hydroxy<br>aclacinomycin A              | NSC 670121                 | -8.338 | 4.59E-<br>09 | -8.338 | -6.0 |              |        |      |              |        |      |              |        |      |              |        |      |       |
| 11-Hydroxy<br>aclacinomycin X              | NSC 670122                 | -8.152 | 7.04E-<br>09 | -8.152 | -6.0 |              |        |      |              |        |      |              |        |      |              |        |      |       |
| 3'-Hydroxy<br>daunorubicin                 | 64842-75-7                 | -5.867 | 1.06E-<br>06 | -5.975 | -4.0 | 1.74E-<br>06 | -5.759 | -5.0 |              |        |      |              |        |      |              |        |      | 0.215 |
| Idarubicin                                 | 57852-57-0                 | -7.594 | 1.70E-<br>08 | -7.770 | -4.0 | 3.81E-<br>08 | -7.419 | -6.0 |              |        |      |              |        |      |              |        |      |       |
| 5-Imino<br>daunorubicin                    | 67324-99-6                 | -6.500 | 3.16E-<br>07 | -6.500 | -5.0 |              |        |      |              |        |      |              |        |      |              |        |      |       |
| Marcellomycin                              | 63710-10-1                 | -7.517 | 3.04E-<br>08 | -7.517 | -4.6 |              |        |      |              |        |      |              |        |      |              |        |      |       |

|                         |                         |        |          |        |      |          |        |      |          |         |      |  |  |  |  |  |  |                                |       |
|-------------------------|-------------------------|--------|----------|--------|------|----------|--------|------|----------|---------|------|--|--|--|--|--|--|--------------------------------|-------|
| Menogaril               | 71628-96-1              | -6.091 | 7.78E-07 | -6.109 | -4.0 | 8.44E-07 | -6.074 | -5.0 |          |         |      |  |  |  |  |  |  | 0.035                          |       |
| 4'-O-methyl doxorubicin | 77121-90-5              | -7.130 | 7.42E-08 | -7.130 | -4.0 |          |        |      |          |         |      |  |  |  |  |  |  |                                |       |
| Morpholino adriamycin   | 89196-04-3              | -8.929 | 1.34E-08 | -7.873 | -5.0 | 5.77E-09 | -8.239 | -5.7 | 2.11E-11 | -10.676 | -9.6 |  |  |  |  |  |  | 2.803                          |       |
| MX2                     | NCI 619003              | -7.192 | 4.74E-08 | -7.324 | -4.0 | 8.70E-08 | -7.060 | -4.6 |          |         |      |  |  |  |  |  |  | 0.264                          |       |
| NSC 286628              | NSC 286628 / 67903-59-7 | -5.854 | 1.40E-06 | -5.854 | -4.0 |          |        |      |          |         |      |  |  |  |  |  |  |                                |       |
| Nogalamycin             | 1404-15-5               | -7.963 | 1.09E-08 | -7.963 | -6.0 |          |        |      |          |         |      |  |  |  |  |  |  |                                |       |
| Pirarubicin             | 72496-41-4              | -6.962 | 5.34E-07 | -6.272 | -4.3 | 2.23E-08 | -7.652 | -5.0 |          |         |      |  |  |  |  |  |  | 1.379                          |       |
| Pyromycin               | 668-17-7                | -7.240 | 5.76E-08 | -7.240 | -3.8 |          |        |      |          |         |      |  |  |  |  |  |  |                                |       |
| Rhodomyconone           | 21288-60-8              | -5.539 | 2.89E-06 | -5.539 | -4.0 |          |        |      |          |         |      |  |  |  |  |  |  |                                |       |
| Steffimycin             | 11033-34-4              | -5.672 | 2.06E-06 | -5.686 | -3.7 | 2.20E-06 | -5.658 | -4.0 |          |         |      |  |  |  |  |  |  | 0.029                          |       |
| Steffimycin B           | NCI 204856              | -5.407 | 3.92E-06 | -5.407 | -4.0 |          |        |      |          |         |      |  |  |  |  |  |  |                                |       |
| Theprubicin             | 95343-20-7              | -6.109 | 1.68E-07 | -6.109 | -4.0 |          |        |      |          |         |      |  |  |  |  |  |  |                                |       |
| Valrubicin              | 56124-62-0              | -6.310 | 4.90E-07 | -6.310 | -4.0 |          |        |      |          |         |      |  |  |  |  |  |  |                                |       |
| Zorubicin / Rubidazone  | 36508-71-1              | -6.500 | 3.16E-07 | -6.500 | -3.9 |          |        |      |          |         |      |  |  |  |  |  |  |                                |       |
|                         |                         |        |          |        |      |          |        |      |          |         |      |  |  |  |  |  |  | average of the span            | 0.587 |
|                         |                         |        |          |        |      |          |        |      |          |         |      |  |  |  |  |  |  | standard deviation of the span | 0.750 |

2. Log GI<sub>50</sub> (leukemia K-562) for anthracyclines

| Name                                    | NSC No. / CAS No.       | average Log (GI <sub>50</sub> ) | Experiment 1            |                                                      | Experiment 2            |                                                      | Experiment 3            |                                                     | Experiment 4            |                                                     | Experiment 5            |                                                     | span of log (GI <sub>50</sub> ) |
|-----------------------------------------|-------------------------|---------------------------------|-------------------------|------------------------------------------------------|-------------------------|------------------------------------------------------|-------------------------|-----------------------------------------------------|-------------------------|-----------------------------------------------------|-------------------------|-----------------------------------------------------|---------------------------------|
|                                         |                         |                                 | Log (GI <sub>50</sub> ) | Log (Highest concentration of drugs for experiments) | Log (GI <sub>50</sub> ) | Log (Highest concentration of drugs for experiments) | Log (GI <sub>50</sub> ) | Log(Highest concentration of drugs for experiments) | Log (GI <sub>50</sub> ) | Log(Highest concentration of drugs for experiments) | Log (GI <sub>50</sub> ) | Log(Highest concentration of drugs for experiments) |                                 |
| 3'-Acetoxy-4'-O-acetyldoxorubicin       | 73113-92-5              | -6.062                          | -6.062                  | -4.0                                                 |                         |                                                      |                         |                                                     |                         |                                                     |                         |                                                     |                                 |
| Aclacinomycin X                         | NSC 670120              | -9.000                          | -9.000                  | -5.0                                                 |                         |                                                      |                         |                                                     |                         |                                                     |                         |                                                     |                                 |
| Aclarubicin                             | 57576-44-0              | -8.772                          | -8.772                  | -5.0                                                 |                         |                                                      |                         |                                                     |                         |                                                     |                         |                                                     |                                 |
| Adriamycin 14-octanoate                 | 51898-39-6              | -7.254                          | -7.254                  | -4.0                                                 |                         |                                                      |                         |                                                     |                         |                                                     |                         |                                                     |                                 |
| Aklavin                                 | 60504-57-6              | -7.135                          | -7.135                  | -4.0                                                 |                         |                                                      |                         |                                                     |                         |                                                     |                         |                                                     |                                 |
| 2'-Bromo-4'-epi-daunorubicin            | NSC 650931              | -7.499                          | -7.692                  | -4.0                                                 | -7.305                  | -5.0                                                 |                         |                                                     |                         |                                                     |                         |                                                     | 0.387                           |
| Cinerubin A                             | NSC 243022 / 34044-10-5 | -10.054                         | -10.054                 | -7.0                                                 |                         |                                                      |                         |                                                     |                         |                                                     |                         |                                                     |                                 |
| N-(1-Cyano-2-methoxyethyl)doxorubicin   | NSC 639659              | -7.382                          | -7.382                  | -4.0                                                 |                         |                                                      |                         |                                                     |                         |                                                     |                         |                                                     |                                 |
| Cyanomorpholino doxorubicin             | 88254-07-3              | -10.288                         | -10.697                 | -7.7                                                 | -9.878                  | -8.0                                                 |                         |                                                     |                         |                                                     |                         |                                                     | 0.819                           |
| Daunomycin 3,4-dichlorobenzoylhydrazone | 66996-54-1              | -6.705                          | -6.705                  | -4.0                                                 |                         |                                                      |                         |                                                     |                         |                                                     |                         |                                                     |                                 |
| Daunomycin 4-nitrobenzoylhydrazone      | 66996-56-3              | -6.449                          | -6.449                  | -4.0                                                 |                         |                                                      |                         |                                                     |                         |                                                     |                         |                                                     |                                 |
| Daunomycin 3-oxime                      | 34610-60-1              | -6.257                          | -6.257                  | -4.0                                                 |                         |                                                      |                         |                                                     |                         |                                                     |                         |                                                     |                                 |
| Daunorubicin                            | 20830-81-3 / 23541-50-6 | -7.531                          | -7.827                  | -4.0                                                 | -6.990                  | -3.3                                                 | -8.000                  | -4.0                                                | -7.307                  | -4.3                                                | -7.207                  | -5.0                                                | 0.837                           |

|                                       |                         |        |        |      |        |      |        |      |        |      |  |  |       |
|---------------------------------------|-------------------------|--------|--------|------|--------|------|--------|------|--------|------|--|--|-------|
| 4-demethoxydaunorubicin / Medorubicin | 64363-63-9              | -7.929 | -7.929 | -4.0 |        |      |        |      |        |      |  |  |       |
| N,N-dibenzyl daunorubicin             | 70878-51-2              | -5.107 | -5.213 | -4.3 | -6.430 | -5.0 |        |      |        |      |  |  | 0.213 |
| N,N-diethyl daunorubicin              | 70844-09-6              | -7.579 | -7.579 | -4.0 |        |      |        |      |        |      |  |  |       |
| N,N-dimethyl daunorubicin             | 67106-76-7              | -7.851 | -7.851 | -4.0 |        |      |        |      |        |      |  |  |       |
| N,N-dimethyl daunomycin               | 70095-84-0              | -8.419 | -8.341 | -5.0 | -8.497 | -8.0 |        |      |        |      |  |  | 0.156 |
| Doxorubicin                           | 25316-40-9 / 23214-92-8 | -6.948 | -6.711 | -4.0 | -6.996 | -4.6 | -7.033 | -6.6 | -7.051 | -4.3 |  |  | 0.340 |
| Duborimycin                           | NSC 180510              | -5.804 | -5.656 | -4.0 | -5.952 | -5.0 |        |      |        |      |  |  | 0.296 |
| Epirubicin                            | 56390-09-1              | -6.747 | -6.662 | -4.0 | -6.832 | -4.3 |        |      |        |      |  |  | 0.100 |
| Esorubicin                            | 63950-06-1              | -7.470 | -7.420 | -3.7 | -7.520 | -5.0 |        |      |        |      |  |  | 0.882 |
| 11-Hydroxy aclacinomycin A            | NSC 670121              | -9.562 | -9.562 | -6.0 |        |      |        |      |        |      |  |  |       |
| 11-Hydroxy aclacinomycin X            | NSC 670122              | -9.708 | -9.708 | -6.0 |        |      |        |      |        |      |  |  |       |
| 3'-Hydroxydaunorubicin                | 64842-75-7              | -5.940 | -6.034 | -4.0 | -5.845 | -5.0 |        |      |        |      |  |  | 0.189 |
| Idarubicin                            | 57852-57-0              | -7.522 | -7.963 | -4.0 | -7.081 | -6.0 |        |      |        |      |  |  |       |
| 5-Imino daunorubicin                  | 67324-99-6              | -6.484 | -6.484 | -5.0 |        |      |        |      |        |      |  |  |       |
| Marcellomycin                         | 63710-10-1              | -7.961 | -7.961 | -4.6 |        |      |        |      |        |      |  |  |       |
| Menogaril                             | 71628-96-1              | -5.892 | -5.874 | -4.0 | -5.909 | -5.0 |        |      |        |      |  |  | 0.035 |

|                         |                            |         |        |      |        |      |          |      |  |  |  |                                      |       |
|-------------------------|----------------------------|---------|--------|------|--------|------|----------|------|--|--|--|--------------------------------------|-------|
| 4'-O-methylodoxorubicin | 77121-90-5                 | -7.546  | -7.546 | -4.0 |        |      |          |      |  |  |  |                                      |       |
| Morpholino adriamycin   | 89196-04-3                 | -10.037 | -8.112 | -5.0 | -8.397 | -5.7 | -13.6020 | -9.6 |  |  |  |                                      | 5.490 |
| MX2                     | NCI 619003                 | -7.150  | -7.371 | -4.0 | -6.929 | -4.6 |          |      |  |  |  |                                      | 0.442 |
| NSC 286628              | NSC 286628 /<br>67903-59-7 | -6.132  | -6.132 | -4.0 |        |      |          |      |  |  |  |                                      |       |
| Nogalamycin             | 1404-15-5                  | -7.810  | -7.810 | -6.0 |        |      |          |      |  |  |  |                                      |       |
| Pirarubicin             | 72496-41-4                 | -6.899  | -6.190 | -4.3 | -7.607 | -5.0 |          |      |  |  |  |                                      | 1.417 |
| Pyrrromycin             | 668-17-7                   | -7.535  | -7.535 | -3.8 |        |      |          |      |  |  |  |                                      |       |
| Rhodomyconone           | 21288-60-8                 | -5.707  | -5.707 | -4.0 |        |      |          |      |  |  |  |                                      |       |
| Steffimycin             | 11033-34-4                 | -5.325  | -4.999 | -3.7 | -5.650 | -4.0 |          |      |  |  |  |                                      | 0.651 |
| Steffimycin B           | NCI 204856                 | -5.446  | -5.446 | -4.0 |        |      |          |      |  |  |  |                                      |       |
| Theprubicin             | 95343-20-7                 | -6.725  | -6.725 | -4.0 |        |      |          |      |  |  |  |                                      |       |
| Valrubicin              | 56124-62-0                 | -6.472  | -6.472 | -4.0 |        |      |          |      |  |  |  |                                      |       |
| Zorubicin / Rubidazone  | 36508-71-1                 | -6.405  | -6.405 | -3.9 |        |      |          |      |  |  |  |                                      |       |
|                         |                            |         |        |      |        |      |          |      |  |  |  | average of<br>the span               | 0.817 |
|                         |                            |         |        |      |        |      |          |      |  |  |  | standard<br>deviation of<br>the span | 1.346 |

3. Polarizability, dipole moment, HOMO energies, vdW molecular volumes and radii, values of the functions for the dipole-dipole, dipole-induced dipole and dispersion interactions, electronic energies of neutral state and free radical, and one-electron reduction energies of anthracyclines.

| Name                                     | NSC No. / CAS No.       | polarizability (au <sup>3</sup> ) | dipole moment (debye) | electronic energy (kcal/mol) | HOMO (hartree) | vdW molecular volume (Å <sup>3</sup> ) | vdW radius (Å) | $-\frac{\mu_1\mu_2}{d^3}$              | $-\frac{\mu_1^2\alpha_2 + \mu_2^2\alpha_1}{d^6}$ | $-\frac{\alpha_1\alpha_2}{d^6} \frac{I_1I_2}{I_1 + I_2}$ | semi-quinone free radicals of anthracyclines | one-electron reduction                            |
|------------------------------------------|-------------------------|-----------------------------------|-----------------------|------------------------------|----------------|----------------------------------------|----------------|----------------------------------------|--------------------------------------------------|----------------------------------------------------------|----------------------------------------------|---------------------------------------------------|
| Name                                     | NSC No. / CAS No.       | polarizability (au <sup>3</sup> ) | dipole moment (debye) | electronic energy (kcal/mol) | HOMO (hartree) | vdW molecular volume (Å <sup>3</sup> ) | vdW radius (Å) | function for dipole-dipole interaction | function for dipole-induced dipole interaction   | function for dispersion interaction                      | electronic energy (kcal/mol) (radical)       | energy of reaction (radical - neutral) (kcal/mol) |
| 3'-Acetoxy-4'-O-acetyldoxorubicin        | 73113-92-5              | 520.0164                          | 3.6706                | -1414291.54                  | -0.3045        | 706.1354179                            | 5.5251         | -0.04808                               | -0.09270                                         | -0.01950                                                 | -1414369.39                                  | -77.85                                            |
| Aclacinomycin X                          | NSC 670120              | 691.5540                          | 10.1622               | -1800812.72                  | -0.3301        | 990.2484339                            | 6.1843         | -0.11330                               | -0.10526                                         | -0.01951                                                 | -1800895.60                                  | -82.88                                            |
| Aclarubicin                              | 57576-44-0              | 668.5867                          | 5.8670                | -1766835.88                  | -0.3288        | 981.0424                               | 6.1651         | -0.06571                               | -0.09036                                         | -0.01900                                                 | -1766917.76                                  | -81.88                                            |
| Adriamycin 14-octanoate                  | 51898-39-6              | 582.1358                          | 13.1595               | -1454056.90                  | -0.3089        | 787.9678                               | 5.7308         | -0.16376                               | -0.13047                                         | -0.01984                                                 | -1454133.81                                  | -76.91                                            |
| Aklavin                                  | 60504-57-6              | 494.3718                          | 4.6581                | -1237058.44                  | -0.3290        | 675.3166                               | 5.4435         | -0.06228                               | -0.09421                                         | -0.02003                                                 | -1237139.54                                  | -81.10                                            |
| 2'-Bromo-4'-epi-daunorubicin             | NSC 650931              | 488.0688                          | 7.7512                | -2776447.91                  | -0.3047        | 639.8651206                            | 5.3465         | -0.10622                               | -0.10862                                         | -0.02004                                                 | -2776528.67                                  | -80.76                                            |
| Cinerubin A                              | NSC 243022 / 34044-10-5 | 691.6419                          | 7.0341                | -1814023.65                  | -0.3087        | 990.0320833                            | 6.1839         | -0.07843                               | -0.09523                                         | -0.01892                                                 | -1814105.67                                  | -82.02                                            |
| N-(1-Cyano-2-methoxyethyl) doxorubicin   | NSC 639659              | 529.1029                          | 14.9515               | -1389310.93                  | -0.3090        | 729.1326852                            | 5.5844         | -0.19295                               | -0.14409                                         | -0.01940                                                 | -1389390.88                                  | -79.95                                            |
| Cyanomorpholino doxorubicin              | 88254-07-3              | 543.6735                          | 5.8983                | -1413224.41                  | -0.3069        | 713.6916                               | 5.5447         | -0.07688                               | -0.10125                                         | -0.02027                                                 | -1413302.18                                  | -77.77                                            |
| Daunomycin 3,4-dichlorobenzoyl hydrazone | 66996-54-1              | 614.5053                          | 2.5992                | -1978195.77                  | -0.3015        | 795.8841592                            | 5.7499         | -0.03219                               | -0.09583                                         | -0.02051                                                 | -1978274.23                                  | -78.46                                            |
| Daunomycin 4-nitrobenzoylhydrazone       | 66996-56-3              | 607.4330                          | 5.4857                | -1529730.29                  | -0.3031        | 805.8943454                            | 5.7739         | -0.06755                               | -0.09895                                         | -0.02009                                                 | -1529804.23                                  | -73.94                                            |
| Daunomycin 3-oxime                       | 34610-60-1              | 478.3110                          | 13.8858               | -1197739.38                  | -0.3083        | 617.7005                               | 5.2841         | -0.19335                               | -0.14894                                         | -0.02039                                                 | -1197818.35                                  | -78.97                                            |
| Daunorubicin / Daunomycin                | 20830-81-3 / 23541-50-6 | 465.2971                          | 5.8725                | -1163027.93                  | -0.3066        | 607.7865                               | 5.2557         | -0.08237                               | -0.10174                                         | -0.02008                                                 | -1163112.60                                  | -84.67                                            |



|                                     |                         |          |         |             |         |             |        |          |          |          |             |        |
|-------------------------------------|-------------------------|----------|---------|-------------|---------|-------------|--------|----------|----------|----------|-------------|--------|
| 4-Demethoxyadriamycin / Medorubicin | 64363-63-9              | 442.5370 | 6.7760  | -1138372.19 | -0.3095 | 591.2679    | 5.2076 | -0.09623 | -0.10317 | -0.01966 | -1138452.09 | -79.90 |
| N,N-dibenzyl-daunorubicin           | 70878-51-2              | 651.3391 | 5.0847  | -1502343.67 | -0.3095 | 898.1425    | 5.9863 | -0.05945 | -0.09434 | -0.01961 | -1502421.04 | -77.37 |
| N,N-diethyladriamycin               | 70844-09-6              | 526.8030 | 3.3488  | -1308898.51 | -0.3058 | 713.2771222 | 5.5437 | -0.04366 | -0.09241 | -0.01961 | -1308978.73 | -80.22 |
| N,N-dimethyladriamycin              | 67106-76-7              | 501.5233 | 11.1572 | -1259562.34 | -0.3072 | 673.5098    | 5.4387 | -0.14936 | -0.12342 | -0.01973 | -1259641.93 | -79.59 |
| N,N-dimethyl-daunomycin             | 70095-84-0              | 495.4331 | 8.0812  | -1212368.14 | -0.3075 | 650.4180    | 5.3758 | -0.10992 | -0.10983 | -0.02013 | -1212446.69 | -78.55 |
| Doxorubicin / Adriamycin            | 25316-40-9 / 23214-92-8 | 468.2626 | 8.9525  | -1210223.31 | -0.3066 | 612.2277    | 5.2684 | -0.12516 | -0.11507 | -0.02007 | -1210301.62 | -78.31 |
| Duborimycin                         | NSC 180510              | 470.2137 | 7.7633  | -1163785.42 | -0.3048 | 613.6512    | 5.2725 | -0.10842 | -0.10939 | -0.02006 | -1163868.32 | -82.90 |
| Epirubicin                          | 56390-09-1              | 470.8064 | 9.0254  | -1210233.22 | -0.3051 | 614.1359    | 5.2739 | -0.12600 | -0.11563 | -0.02008 | -1210309.15 | -75.93 |
| Esorubicin                          | 63950-06-1              | 467.2721 | 3.9429  | -1163029.04 | -0.3064 | 606.9269    | 5.2532 | -0.05534 | -0.09665 | -0.02018 | -1163106.41 | -77.37 |
| 11-Hydroxy aclacinomycin A          | NSC 670121              | 691.7573 | 5.7777  | -1814045.88 | -0.3136 | 976.3583332 | 6.1553 | -0.06486 | -0.09351 | -0.01933 | -1814129.40 | -83.52 |
| 11-Hydroxy aclacinomycin X          | NSC 670122              | 719.3567 | 8.7084  | -1848023.87 | -0.3184 | 993.199931  | 6.1905 | -0.09695 | -0.10328 | -0.01990 | -1848106.91 | -83.04 |
| 3'-Hydroxy daunorubicin             | 64842-75-7              | 463.0718 | 5.5233  | -1175503.34 | -0.3066 | 602.3300    | 5.2399 | -0.07779 | -0.10094 | -0.02014 | -1175582.36 | -79.02 |
| Idarubicin                          | 57852-57-0              | 437.3788 | 2.5473  | -1091165.56 | -0.3080 | 572.1987    | 5.1510 | -0.03671 | -0.09285 | -0.01996 | -1091243.63 | -78.07 |
| 5-Imino daunorubicin                | 67324-99-6              | 463.2888 | 9.9261  | -1150560.66 | -0.2941 | 605.6616    | 5.2495 | -0.13945 | -0.12067 | -0.01966 | -1150631.46 | -70.80 |
| Marcellomycin                       | 63710-10-1              | 700.6283 | 2.3262  | -1861999.59 | -0.3100 | 1020.7432   | 6.2472 | -0.02555 | -0.08551 | -0.01863 | -1862085.71 | -86.12 |
| Menogaril                           | 71628-96-1              | 487.9738 | 3.8940  | -1187689.34 | -0.3186 | 609.7507    | 5.2613 | -0.05454 | -0.10020 | -0.02138 | -1187770.72 | -81.38 |

|                                                                          |                            |          |           |             |         |             |        |          |          |          |             |        |
|--------------------------------------------------------------------------|----------------------------|----------|-----------|-------------|---------|-------------|--------|----------|----------|----------|-------------|--------|
| 4'-O-methylodoxorubicin                                                  | 77121-90-5                 | 483.6345 | 6.4192    | -1234889.50 | -0.3060 | 636.143927  | 5.3362 | -0.08820 | -0.10300 | -0.02001 | -1234967.10 | -77.60 |
| Morpholino adriamycin                                                    | 89196-04-3                 | 528.9651 | 9.3615    | -1355339.29 | -0.3072 | 721.9789    | 5.5661 | -0.12137 | -0.11105 | -0.01952 | -1355419.75 | -80.46 |
| MX2                                                                      | NCI 619003                 | 518.3925 | 6.7066    | -1284240.02 | -0.3159 | 681.2624    | 5.4594 | -0.08931 | -0.10392 | -0.02045 | -1284325.37 | -85.35 |
| NSC 286628                                                               | NSC 286628 /<br>67903-59-7 | 541.8562 | 7.0350    | -1308023.15 | -0.3074 | 702.3169576 | 5.5151 | -0.09238 | -0.10626 | -0.02052 | -1308099.54 | -76.39 |
| Nogalamycin                                                              | 1404-15-5                  | 658.0645 | 4.2489    | -1740748.35 | -0.3187 | 928.2166    | 6.0524 | -0.04889 | -0.09072 | -0.01946 | -1740829.65 | -81.30 |
| Pirarubicin                                                              | 72496-41-4                 | 553.4498 | 8.1748    | -1380021.85 | -0.3039 | 771.5144    | 5.6906 | -0.10275 | -0.10330 | -0.01909 | -1380104.84 | -82.99 |
| Pyromycin                                                                | 668-17-7                   | 519.1163 | 4.1183    | -1284259.84 | -0.3146 | 685.7169    | 5.4713 | -0.05468 | -0.09600 | -0.02031 | -1284344.51 | -84.67 |
| Rhodomyconone                                                            | 21288-60-8                 | 389.9991 | 2.8675    | -958532.96  | -0.3151 | 471.7197    | 4.8299 | -0.04496 | -0.09893 | -0.02130 | -958615.24  | -82.28 |
| Steffimycin                                                              | 11033-34-4                 | 493.5643 | 6.3736    | -1294557.12 | -0.3268 | 658.8005    | 5.3988 | -0.08619 | -0.10143 | -0.02039 | -1294639.29 | -82.17 |
| Steffimycin B                                                            | NCI 204856                 | 504.0612 | 6.2970    | -1319219.10 | -0.3285 | 673.4409    | 5.4385 | -0.08430 | -0.10103 | -0.02046 | -1319301.66 | -82.56 |
| Theprubicin                                                              | 95343-20-7                 | 540.8079 | 11.1695   | -1380017.23 | -0.3063 | 720.3297    | 5.5619 | -0.14496 | -0.12268 | -0.01997 | -1380095.42 | -78.19 |
| Valrubicin                                                               | 56124-62-0                 | 572.5026 | 6.7839    | -1662658.47 | -0.3008 | 815.9468    | 5.7978 | -0.08304 | -0.09615 | -0.01864 | -1662737.14 | -78.67 |
| Zorubicin / Rubidazone                                                   | 36508-71-1                 | 590.5316 | 4.8960    | -1401403.87 | -0.3093 | 753.2377    | 5.6453 | -0.06223 | -0.10123 | -0.02101 | -1401483.79 | -79.92 |
| Dummy for complete calculation of van der Waals forces: AG-TC base pairs |                            | 749.0275 | 22.321374 |             | -0.2783 | 1107.495038 | 6.4194 |          |          |          |             |        |

#### 4. Chemical structures of anthracyclines

| Name                              | NSC No. / CAS No. | Chemical structures                                                                                                                                                                                                                                                                                                                                                                                                                                                               |
|-----------------------------------|-------------------|-----------------------------------------------------------------------------------------------------------------------------------------------------------------------------------------------------------------------------------------------------------------------------------------------------------------------------------------------------------------------------------------------------------------------------------------------------------------------------------|
| 3'-Acetoxy-4'-O-acetyldoxorubicin | 73113-92-5        | 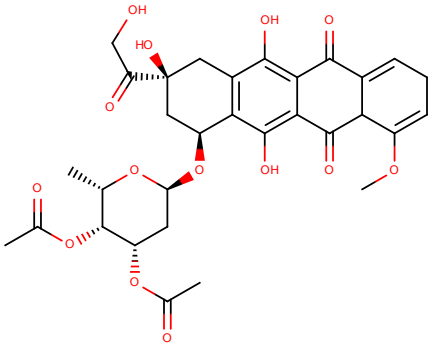 <p>The structure shows a tetracyclic anthracycline core with a methoxy group at C-10, hydroxyl groups at C-1, C-5, and C-7, and a carbonyl group at C-9. It is linked at C-13 to a 2,6-dideoxy-3'-O-acetyl-4'-O-acetyl-β-D-glucopyranoside sugar moiety.</p>                                                                                                                                  |
| Aclacinomycin X                   | NSC 670120        |  <p>The structure features a tetracyclic anthracycline core with a methoxy group at C-10, hydroxyl groups at C-1, C-5, and C-7, and a carbonyl group at C-9. It is linked at C-13 to a complex sugar moiety consisting of a 2,6-dideoxy-3'-O-(2-amino-6-methyl-4-hydroxy-2-pyridinyl)-β-D-glucopyranoside unit connected to a 2,6-dideoxy-3'-O-(2-dimethylamino)-β-D-glucopyranoside unit.</p> |
| Aclarubicin                       | 57576-44-0        |  <p>The structure shows a tetracyclic anthracycline core with a methoxy group at C-10, hydroxyl groups at C-1, C-5, and C-7, and a carbonyl group at C-9. It is linked at C-13 to a complex sugar moiety consisting of a 2,6-dideoxy-3'-O-(2-dimethylamino)-β-D-glucopyranoside unit connected to a 2,6-dideoxy-3'-O-(2-amino-6-methyl-4-hydroxy-2-pyridinyl)-β-D-glucopyranoside unit.</p>  |

|                                     |                   |                                                                                                                                                                                                                                                                                                                                                                                                                                                                                                                                                                                                                                                                                                                      |
|-------------------------------------|-------------------|----------------------------------------------------------------------------------------------------------------------------------------------------------------------------------------------------------------------------------------------------------------------------------------------------------------------------------------------------------------------------------------------------------------------------------------------------------------------------------------------------------------------------------------------------------------------------------------------------------------------------------------------------------------------------------------------------------------------|
| <p>Adriamycin 14-octanoate</p>      | <p>51898-39-6</p> | 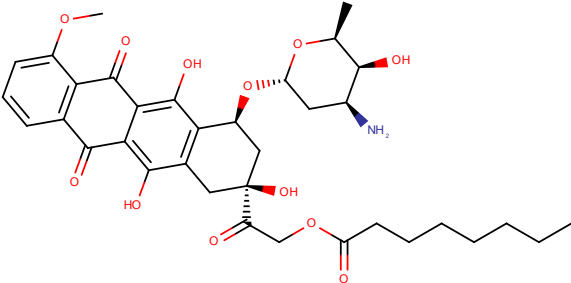 <p>The structure shows the anthracycline core of Adriamycin with an octanoate ester group attached to the 14-position of the D-glucosamine moiety. The anthracycline core consists of a tetracyclic system with a phenanthrene-like core fused to a six-membered ring containing a ketone and a hydroxyl group. The D-glucosamine moiety is attached to the 14-position of the anthracycline core and has a primary amine group and a hydroxyl group. The octanoate ester group is attached to the 14-position of the D-glucosamine moiety.</p>                                                                                  |
| <p>Aklavin</p>                      | <p>60504-57-6</p> |  <p>The structure shows the anthracycline core of Aklavin with a methyl ester group attached to the 14-position of the D-glucosamine moiety. The anthracycline core consists of a tetracyclic system with a phenanthrene-like core fused to a six-membered ring containing a ketone and a hydroxyl group. The D-glucosamine moiety is attached to the 14-position of the anthracycline core and has a primary amine group and a hydroxyl group. The methyl ester group is attached to the 14-position of the D-glucosamine moiety.</p>                                                                                            |
| <p>2'-Bromo-4'-epi-daunorubicin</p> | <p>NSC 650931</p> |  <p>The structure shows the anthracycline core of 2'-Bromo-4'-epi-daunorubicin with a bromine atom at the 2' position and a methyl group at the 4' position of the D-glucosamine moiety. The anthracycline core consists of a tetracyclic system with a phenanthrene-like core fused to a six-membered ring containing a ketone and a hydroxyl group. The D-glucosamine moiety is attached to the 14-position of the anthracycline core and has a primary amine group and a hydroxyl group. The bromine atom is attached to the 2' position and the methyl group is attached to the 4' position of the D-glucosamine moiety.</p> |

|                                              |                                    |                                                                                                                                                                                                                                                                                                                                                                                           |
|----------------------------------------------|------------------------------------|-------------------------------------------------------------------------------------------------------------------------------------------------------------------------------------------------------------------------------------------------------------------------------------------------------------------------------------------------------------------------------------------|
| <p>Cinerubin A</p>                           | <p>NSC 243022 /<br/>34044-10-5</p> | 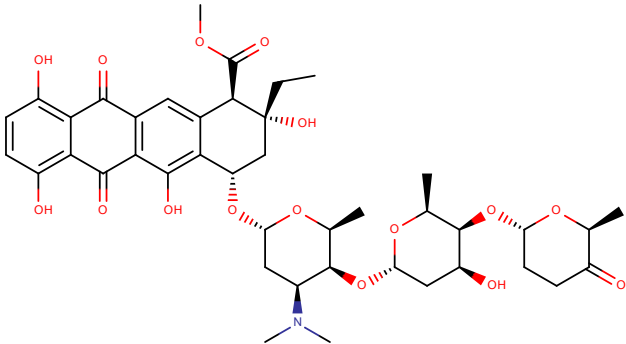 <p>The structure of Cinerubin A features a tetracycline core with a 4-hydroxyphenyl group at C4, a methyl group at C5, and a 2-methoxyethyl group at C6. It is linked via a glycosidic bond to a disaccharide chain consisting of a 2-deoxy-2-(dimethylamino)ribose unit and a 2-deoxyribose unit.</p> |
| <p>N-(1-Cyano-2-methoxyethyl)doxorubicin</p> | <p>NSC 639659</p>                  |  <p>This structure is a doxorubicin derivative with a methoxy group at C7 and a 1-cyano-2-methoxyethyl group attached to the C12 hydroxyl group. The tetracycline core has hydroxyl groups at C11 and C13, and a methyl group at C14.</p>                                                              |
| <p>Cyanomorpholino doxorubicin</p>           | <p>88254-07-3</p>                  |  <p>The structure shows a doxorubicin core with a methoxy group at C7 and a 1-cyano-2-morpholinoethyl group attached to the C12 hydroxyl group. The tetracycline core has hydroxyl groups at C11 and C13, and a methyl group at C14.</p>                                                              |

|                                                 |                   |                                                                                      |
|-------------------------------------------------|-------------------|--------------------------------------------------------------------------------------|
| <p>Daunomycin 3,4-dichlorobenzoyl hydrazone</p> | <p>66996-54-1</p> | 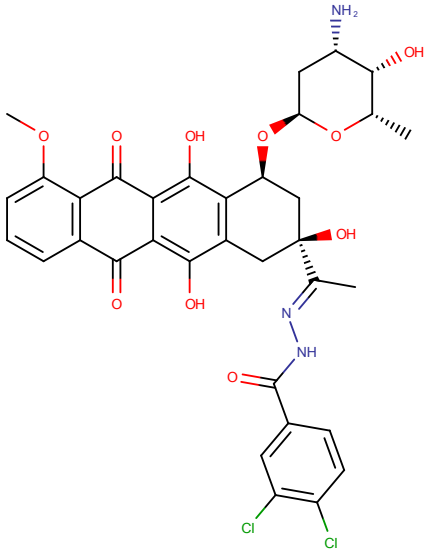  |
| <p>Daunomycin 4-nitrobenzoylhydrazone</p>       | <p>66996-56-3</p> |  |

|                                                |                                    |                                                                                                                                                                                                                                                                                                                                         |
|------------------------------------------------|------------------------------------|-----------------------------------------------------------------------------------------------------------------------------------------------------------------------------------------------------------------------------------------------------------------------------------------------------------------------------------------|
| <p>Daunomycin 3-oxime</p>                      | <p>34610-60-1</p>                  | 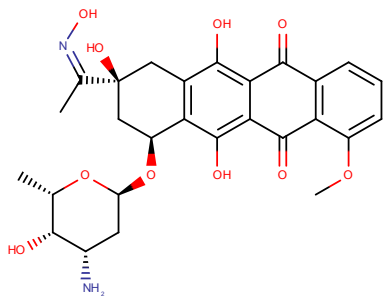 <p>The structure shows a tetracyclic anthracycline core with a 3-oxime group at C-13, a 4-O-methyl group at C-10, and a 2-deoxy-3-amino-4-hydroxy sugar moiety at C-14. Stereochemistry is indicated with wedges and dashes.</p>                    |
| <p>Daunorubicin / Daunomycin</p>               | <p>20830-81-3 /<br/>23541-50-6</p> |  <p>The structure shows a tetracyclic anthracycline core with a 4-O-methyl group at C-10, a 2-deoxy-3-amino-4-hydroxy sugar moiety at C-14, and a 2-acetyl-3-hydroxy sugar moiety at C-13. Stereochemistry is indicated with wedges and dashes.</p>  |
| <p>4-Demethoxyadriamycin /<br/>Medorubicin</p> | <p>64363-63-9</p>                  |  <p>The structure shows a tetracyclic anthracycline core with a 4-O-methyl group at C-10, a 2-deoxy-3-amino-4-hydroxy sugar moiety at C-14, and a 2-hydroxy-3-acetyl sugar moiety at C-13. Stereochemistry is indicated with wedges and dashes.</p> |

|                                  |                   |                                                                                                                                                                                                                                                                                                                                                                                                                                                                                                                             |
|----------------------------------|-------------------|-----------------------------------------------------------------------------------------------------------------------------------------------------------------------------------------------------------------------------------------------------------------------------------------------------------------------------------------------------------------------------------------------------------------------------------------------------------------------------------------------------------------------------|
| <p>N,N-dibenzyl-daunorubicin</p> | <p>70878-51-2</p> | 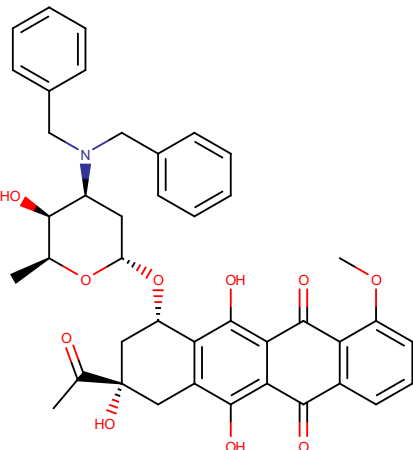 <p>The structure shows a daunosamine sugar moiety (a six-membered ring with a methyl group at C2, a hydroxyl group at C3, and a glycosidic bond at C4) linked to the C7 position of a tetracyclic anthracycline core. The core consists of a phenanthrene ring system with a methyl ketone at C13, a hydroxyl group at C14, and a methoxy group at C10. The nitrogen atom of the daunosamine is substituted with two benzyl groups.</p> |
| <p>N,N-diethyl-adriamycin</p>    | <p>70844-09-6</p> |  <p>The structure shows an adriamycin sugar moiety (a six-membered ring with a methyl group at C2, a hydroxyl group at C3, and a glycosidic bond at C4) linked to the C7 position of a tetracyclic anthracycline core. The core features a phenanthrene ring system with a methyl ketone at C13, a hydroxyl group at C14, and a methoxy group at C10. The nitrogen atom of the adriamycin is substituted with two ethyl groups.</p>      |
| <p>N,N-dimethyl-adriamycin</p>   | <p>67106-76-7</p> |  <p>The structure shows an adriamycin sugar moiety (a six-membered ring with a methyl group at C2, a hydroxyl group at C3, and a glycosidic bond at C4) linked to the C7 position of a tetracyclic anthracycline core. The core features a phenanthrene ring system with a methyl ketone at C13, a hydroxyl group at C14, and a methoxy group at C10. The nitrogen atom of the adriamycin is substituted with two methyl groups.</p>    |



|                                 |                                    |                                                                                                                                                                                                                                                                                                     |
|---------------------------------|------------------------------------|-----------------------------------------------------------------------------------------------------------------------------------------------------------------------------------------------------------------------------------------------------------------------------------------------------|
| <p>N,N-dimethyl-daunomycin</p>  | <p>70095-84-0</p>                  | 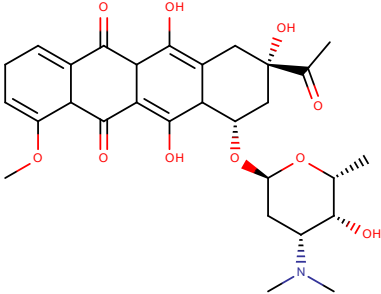 <p>The structure shows a tetracyclic anthracycline core with a dimethylamino group on the aglycone chain and a 2,6-dideoxy-3,4-dihydroxy-5-(dimethylamino)ribose sugar attached to the C-13 position.</p>       |
| <p>Doxorubicin / Adriamycin</p> | <p>25316-40-9 /<br/>23214-92-8</p> |  <p>The structure shows a tetracyclic anthracycline core with a 2,6-dideoxy-3,4-dihydroxyribose sugar attached to the C-13 position and a primary amino group at the C-2 position of the sugar.</p>              |
| <p>Duborimycin</p>              | <p>NSC 180510</p>                  |  <p>The structure shows a tetracyclic anthracycline core with a 2,6-dideoxy-3,4-dihydroxy-5-amino-ribose sugar attached to the C-13 position and a methyl group at the C-14 position of the aglycone chain.</p> |

|                                   |                   |                                                                                                                                                                                                                                                                                                                                                                                                                                                                                                                                                                                                      |
|-----------------------------------|-------------------|------------------------------------------------------------------------------------------------------------------------------------------------------------------------------------------------------------------------------------------------------------------------------------------------------------------------------------------------------------------------------------------------------------------------------------------------------------------------------------------------------------------------------------------------------------------------------------------------------|
| <p>Epirubicin</p>                 | <p>56390-09-1</p> | 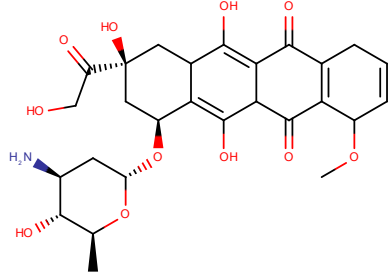 <p>The chemical structure of Epirubicin is a tetracyclic anthracycline derivative. It features a central anthraquinone core with a 14a-hydroxy group and a 10-methoxy group. Attached to the 7-position of the anthraquinone is a 4,5-dihydro-2H-pyridin-2-ylidene group. At the 12-position, there is a 2,3,4-trihydroxybutyl side chain. At the 13-position, there is a 2-amino-2-deoxy-3,4,5-trihydroxyhexyl side chain.</p>                                                                                  |
| <p>Esorubicin</p>                 | <p>63950-06-1</p> |  <p>The chemical structure of Esorubicin is a tetracyclic anthracycline derivative. It features a central anthraquinone core with a 14a-hydroxy group and a 10-methoxy group. Attached to the 7-position of the anthraquinone is a 2-amino-2-deoxy-3,4,5-trihydroxyhexyl side chain. At the 12-position, there is a 2,3,4-trihydroxybutyl side chain. At the 13-position, there is a 2,3,4-trihydroxybutyl side chain.</p>                                                                                        |
| <p>11-Hydroxy aclacinomycin A</p> | <p>NSC 670121</p> |  <p>The chemical structure of 11-Hydroxy aclacinomycin A is a complex tetracyclic anthracycline derivative. It features a central anthraquinone core with a 14a-hydroxy group and a 10-methoxy group. Attached to the 7-position of the anthraquinone is a 2,3,4-trihydroxybutyl side chain. At the 12-position, there is a 2,3,4-trihydroxybutyl side chain. At the 13-position, there is a 2,3,4-trihydroxybutyl side chain. The structure is highly substituted with various hydroxyl and methoxy groups.</p> |

|                                   |                   |                                                                                                                                                                                                                                                                                                                                                                                                                                                                                                                                                                                                                                                                    |
|-----------------------------------|-------------------|--------------------------------------------------------------------------------------------------------------------------------------------------------------------------------------------------------------------------------------------------------------------------------------------------------------------------------------------------------------------------------------------------------------------------------------------------------------------------------------------------------------------------------------------------------------------------------------------------------------------------------------------------------------------|
| <p>11-Hydroxy aclacinomycin X</p> | <p>NSC 670122</p> | 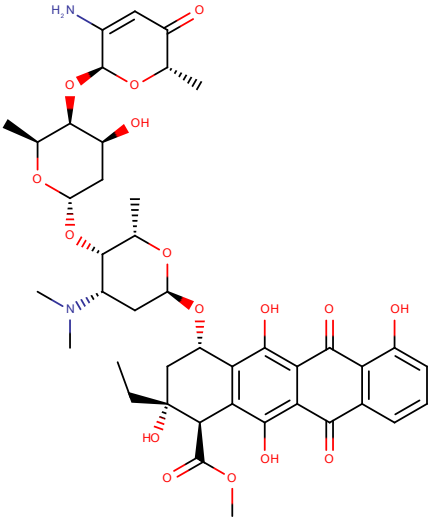 <p>The structure shows a complex polycyclic molecule. It features a central tetracyclic core with a phenanthrene-like system. Attached to this core are two sugar rings. The upper sugar ring is a pyranose with a methyl group at C2, a hydroxyl group at C3, and a glycosidic linkage at C4 to a pyrimidine-2,4,6-trione ring. The lower sugar ring is also a pyranose with a methyl group at C2, a hydroxyl group at C3, and a glycosidic linkage at C4 to the C10 position of the tetracyclic core. A dimethylamino group is attached to the C12 position of the core.</p> |
| <p>3'-Hydroxy daunorubicin</p>    | <p>64842-75-7</p> |  <p>The structure shows a tetracyclic core with a phenanthrene-like system. It has a methyl group at C12 and a hydroxyl group at C13. A glycosidic linkage at C10 connects to a pyranose sugar ring. This sugar ring has a methyl group at C2, a hydroxyl group at C3, and another hydroxyl group at C4. The C1 position of the sugar is linked to the C10 of the tetracyclic core.</p>                                                                                                                                                                                        |
| <p>Idarubicin</p>                 | <p>57852-57-0</p> |  <p>The structure shows a tetracyclic core with a phenanthrene-like system. It has a methyl group at C12 and a hydroxyl group at C13. A glycosidic linkage at C10 connects to a pyranose sugar ring. This sugar ring has a methyl group at C2, a hydroxyl group at C3, and an amino group at C4. The C1 position of the sugar is linked to the C10 of the tetracyclic core.</p>                                                                                                                                                                                               |

|                             |                   |                                                                                                                                                                                                                                                                                                                                                                                                                                         |
|-----------------------------|-------------------|-----------------------------------------------------------------------------------------------------------------------------------------------------------------------------------------------------------------------------------------------------------------------------------------------------------------------------------------------------------------------------------------------------------------------------------------|
| <p>5-Imino daunorubicin</p> | <p>67324-99-6</p> | 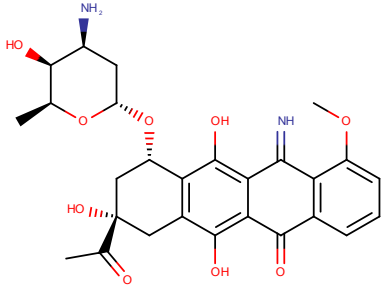 <p>The structure shows a tetracyclic anthracycline core. It features a 5-imino group (NH) at the C11 position, a methoxy group at C12, and a 2-deoxy-3-amino-4-hydroxy sugar moiety attached to the C13 position. The C7 position has a methyl group, and the C14 position has a methyl ester group. Hydroxyl groups are present at C4 and C10.</p> |
| <p>Marcellomycin</p>        | <p>63710-10-1</p> |  <p>The structure shows a tetracyclic anthracycline core with a 11-deoxy-5-imino group (NH) at the C11 position. It has a methoxy group at C12 and a 2-deoxy-3,4,6-trihydroxy sugar moiety at C13. The C7 position has an ethyl group, and the C14 position has a methyl ester group. Hydroxyl groups are present at C4, C10, and C11.</p>          |
| <p>Menogaril</p>            | <p>71628-96-1</p> |  <p>The structure shows a tetracyclic anthracycline core with a 11-deoxy-5-imino group (NH) at the C11 position. It has a methoxy group at C12 and a 2-deoxy-3,4,6-trihydroxy sugar moiety at C13. The C7 position has a methyl group, and the C14 position has a methyl ester group. Hydroxyl groups are present at C4, C10, and C11.</p>         |

|                              |                   |                                                                                                                                                                                                                                                                                                                                                                                                                                                                                                                       |
|------------------------------|-------------------|-----------------------------------------------------------------------------------------------------------------------------------------------------------------------------------------------------------------------------------------------------------------------------------------------------------------------------------------------------------------------------------------------------------------------------------------------------------------------------------------------------------------------|
| <p>4'-O-methyladriamycin</p> | <p>77121-90-5</p> | 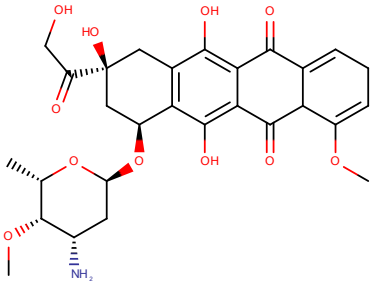 <p>The structure shows the adriamycin core with a methyl group at the 4' position of the aglycone ring. It is linked to a glucose molecule at the C-13 position. The glucose is further linked to a morpholine ring at the C-2 position. The morpholine ring has a methyl group at the 4-position and an amino group at the 3-position.</p>                                                                                       |
| <p>Morpholino adriamycin</p> | <p>89196-04-3</p> |  <p>The structure shows the adriamycin core with a hydroxyl group at the 4' position of the aglycone ring. It is linked to a glucose molecule at the C-13 position. The glucose is further linked to a morpholine ring at the C-2 position. The morpholine ring has a methyl group at the 4-position and a hydroxyl group at the 3-position.</p>                                                                                   |
| <p>MX2</p>                   | <p>NCI 619003</p> |  <p>The structure shows the adriamycin core with a hydroxyl group at the 4' position of the aglycone ring. It is linked to a glucose molecule at the C-13 position. The glucose is further linked to a morpholine ring at the C-2 position. The morpholine ring has a methyl group at the 4-position and a hydroxyl group at the 3-position. Additionally, there is a methyl group at the C-14 position of the aglycone ring.</p> |

|                    |                                    |                                                                                                                                                                                                                                                                                                                                                                                                                                                                                                                                                                                                                            |
|--------------------|------------------------------------|----------------------------------------------------------------------------------------------------------------------------------------------------------------------------------------------------------------------------------------------------------------------------------------------------------------------------------------------------------------------------------------------------------------------------------------------------------------------------------------------------------------------------------------------------------------------------------------------------------------------------|
| <p>NSC 286628</p>  | <p>NSC 286628 /<br/>67903-59-7</p> | 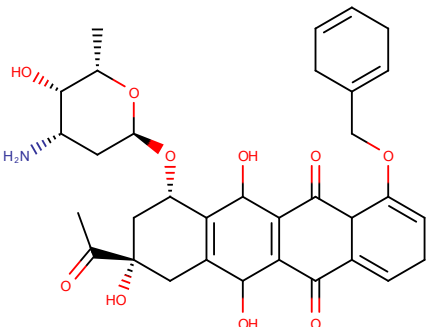 <p>The structure of NSC 286628 is a complex polycyclic molecule. It features a central tetracyclic core consisting of a benzene ring fused to a six-membered ring, which is further fused to two five-membered rings. This core is substituted with several hydroxyl groups (OH) and a carbonyl group (C=O). A side chain includes a six-membered ring with a hydroxyl group and an amino group (NH<sub>2</sub>). Another side chain consists of a benzyl group attached to an oxygen atom, which is linked to the main structure.</p> |
| <p>Nogalamycin</p> | <p>1404-15-5</p>                   |  <p>The structure of Nogalamycin is a highly complex polycyclic molecule. It features a central tetracyclic core with multiple hydroxyl groups (OH) and carbonyl groups (C=O). The molecule is heavily substituted with various side chains, including a six-membered ring with a hydroxyl group and a methyl group, and a complex side chain with multiple oxygen atoms and methyl groups.</p>                                                                                                                                         |
| <p>Pirarubicin</p> | <p>72496-41-4</p>                  |  <p>The structure of Pirarubicin is a complex polycyclic molecule. It features a central tetracyclic core with multiple hydroxyl groups (OH) and carbonyl groups (C=O). The molecule is substituted with a side chain containing a six-membered ring with a hydroxyl group and a methyl group, and another side chain containing a six-membered ring with a hydroxyl group and a methyl group. A side chain also includes a six-membered ring with a hydroxyl group and a methyl group.</p>                                            |

|                      |                   |                                                                                                                                                                                                                                                                                                                                                                                                                                                                                                                      |
|----------------------|-------------------|----------------------------------------------------------------------------------------------------------------------------------------------------------------------------------------------------------------------------------------------------------------------------------------------------------------------------------------------------------------------------------------------------------------------------------------------------------------------------------------------------------------------|
| <p>Pyrrromycin</p>   | <p>668-17-7</p>   | 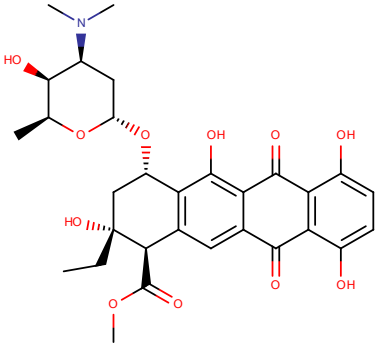 <p>The structure of Pyrrromycin features a central naphthoquinone core. The left ring is substituted with a 2-hydroxy-2-(dimethylamino)ethyl group and a methyl group. The right ring is substituted with two hydroxyl groups and a methyl group. A side chain is attached to the central ring, containing a methyl group, a hydroxyl group, and a methyl ester group.</p>                                                       |
| <p>Rhodomycinone</p> | <p>21288-60-8</p> |  <p>Rhodomycinone consists of a naphthoquinone core. The left ring has a hydroxyl group. The right ring has two hydroxyl groups and a methyl group. A side chain is attached to the central ring, featuring a methyl group, a hydroxyl group, and a methyl ester group.</p>                                                                                                                                                       |
| <p>Steffimycin</p>   | <p>11033-34-4</p> |  <p>Steffimycin has a naphthoquinone core. The left ring is substituted with a methoxy group and a hydroxyl group. The right ring has a hydroxyl group and a methyl group. A side chain is attached to the central ring, containing a methyl group, a hydroxyl group, and a methyl ester group. A second side chain is attached to the right ring, consisting of a methyl group, a hydroxyl group, and a methyl ester group.</p> |
| <p>Steffimycin B</p> | <p>NCI 204856</p> |  <p>Steffimycin B is structurally similar to Steffimycin, featuring a naphthoquinone core with a methoxy group and a hydroxyl group on the left ring, and a hydroxyl group and a methyl group on the right ring. It has two side chains, each containing a methyl group, a hydroxyl group, and a methyl ester group.</p>                                                                                                        |

|                               |                   |                                                                                                                                                                                                                                                                                                                                                                                                                                                                                                                                                              |
|-------------------------------|-------------------|--------------------------------------------------------------------------------------------------------------------------------------------------------------------------------------------------------------------------------------------------------------------------------------------------------------------------------------------------------------------------------------------------------------------------------------------------------------------------------------------------------------------------------------------------------------|
| <p>Theprubicin</p>            | <p>95343-20-7</p> | 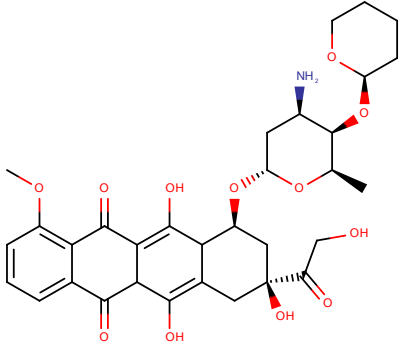 <p>The chemical structure of Theprubicin is a complex polycyclic molecule. It features a central tetracyclic core with a methoxy group on the leftmost ring and two hydroxyl groups on the rightmost ring. Attached to the core are a 2,6-dihydroxy-4-methyl-3,4-dihydro-2H-pyridin-2-ylidene group and a 2-amino-2,6-dihydroxy-4-methyl-3,4-dihydro-2H-pyridin-2-ylidene group. The stereochemistry is indicated with wedges and dashes.</p>                            |
| <p>Valrubicin</p>             | <p>56124-62-0</p> |  <p>The chemical structure of Valrubicin is a complex polycyclic molecule. It features a central tetracyclic core with a methoxy group on the leftmost ring and two hydroxyl groups on the rightmost ring. Attached to the core are a 2,6-dihydroxy-4-methyl-3,4-dihydro-2H-pyridin-2-ylidene group and a 2-(2,2,2-trifluoroethylamino)-2,6-dihydroxy-4-methyl-3,4-dihydro-2H-pyridin-2-ylidene group. The stereochemistry is indicated with wedges and dashes.</p>       |
| <p>Zorubicin / Rubidazone</p> | <p>36508-71-1</p> |  <p>The chemical structure of Zorubicin / Rubidazone is a complex polycyclic molecule. It features a central tetracyclic core with a methoxy group on the leftmost ring and two hydroxyl groups on the rightmost ring. Attached to the core are a 2,6-dihydroxy-4-methyl-3,4-dihydro-2H-pyridin-2-ylidene group and a 2-(2-amino-2,6-dihydroxy-4-methyl-3,4-dihydro-2H-pyridin-2-ylidene)phenylamino group. The stereochemistry is indicated with wedges and dashes.</p> |



5. Cartesian coordinates of the optimized chemical structures of anthracyclines and the structure of AG-TC base pairs

| Name                               | NSC No. / CAS No. | Cartesian coordinates |               |               |               |               |
|------------------------------------|-------------------|-----------------------|---------------|---------------|---------------|---------------|
| 3'-Acetoxy-4'-O-acetyl-doxorubicin | 73113-92-5        | H                     | 1.0           | -2.6798993224 | -1.5955487037 | -6.7702171546 |
|                                    |                   | H                     | 1.0           | -0.9381479833 | -1.9767177027 | -6.8230672273 |
|                                    |                   | H                     | 1.0           | -2.1308666448 | -3.2995678371 | -6.7355112319 |
|                                    |                   | C                     | 6.0           | -1.9007862047 | -2.2780012176 | -6.4099268698 |
|                                    |                   | H                     | 1.0           | -4.1739141992 | -3.0031275529 | -5.7777895662 |
|                                    |                   | O                     | 8.0           | -1.7465141383 | -2.1989152218 | -4.9980378715 |
|                                    |                   | C                     | 6.0           | -4.0283569223 | -2.9247452992 | -4.7082150061 |
|                                    |                   | H                     | 1.0           | -6.0315442907 | -3.5536282759 | -4.2733328612 |
|                                    |                   | C                     | 6.0           | -2.7863492911 | -2.5115134075 | -4.1983955424 |
|                                    |                   | C                     | 6.0           | -5.0817784519 | -3.2362936709 | -3.8535324721 |
|                                    |                   | C                     | 6.0           | -2.6010544414 | -2.4107494485 | -2.7894218080 |
|                                    |                   | O                     | 8.0           | -0.3139238470 | -1.7222412406 | -2.8914113515 |
|                                    |                   | H                     | 1.0           | 2.0013149165  | 6.6187307810  | -2.9093277557 |
|                                    |                   | C                     | 6.0           | -4.9237297525 | -3.1428766319 | -2.4762845658 |
|                                    |                   | H                     | 1.0           | 0.8994520101  | 2.3216774067  | -3.0982283371 |
|                                    |                   | C                     | 6.0           | -1.3126182273 | -1.9902424146 | -2.1864895483 |
|                                    |                   | H                     | 1.0           | -5.7278136934 | -3.3784549176 | -1.7900854712 |
|                                    |                   | C                     | 6.0           | -3.6965445711 | -2.7335618506 | -1.9506289634 |
|                                    |                   | H                     | 1.0           | 3.1027845475  | 5.5098830528  | -2.0552506674 |
|                                    |                   | C                     | 6.0           | 2.0888143666  | 5.6380664794  | -2.4436726353 |
|                                    |                   | H                     | 1.0           | 0.7923258696  | -1.3719722903 | -1.8204701933 |
|                                    |                   | O                     | 8.0           | 4.8404783918  | 4.2610062471  | -0.4120577301 |
|                                    |                   | H                     | 1.0           | 2.5976643268  | 3.4905424844  | -1.4774349220 |
|                                    |                   | H                     | 1.0           | 1.9282268692  | 4.8658214721  | -3.2029326653 |
|                                    |                   | C                     | 6.0           | 0.2811786481  | 2.0461223143  | -2.2373516611 |
|                                    |                   | H                     | 1.0           | -0.1460217789 | 1.0604189211  | -2.4322608700 |
|                                    |                   | C                     | 6.0           | 1.0319331224  | 5.5594370436  | -1.3564847550 |
|                                    |                   | H                     | 1.0           | 5.6775682017  | 6.5116458091  | 0.5333201727  |
|                                    |                   | H                     | 1.0           | -0.5280923141 | 2.7726648026  | -2.1342057900 |
|                                    |                   | O                     | 8.0           | 0.2631102757  | 6.4601047069  | -1.1234045600 |
| C                                  | 6.0               | -1.2234169976         | -1.8814495079 | -0.7271788884 |               |               |
| O                                  | 8.0               | 1.0702000936          | -1.2039393434 | -0.8696439639 |               |               |
| C                                  | 6.0               | -3.5847330255         | -2.6488886661 | -0.4709089843 |               |               |
| H                                  | 1.0               | 1.8836761631          | 1.2216933380  | -1.0556767250 |               |               |
| C                                  | 6.0               | 4.3064246627          | 4.8746383849  | 0.4892069149  |               |               |
| C                                  | 6.0               | 1.8597061254          | 3.3285037605  | -0.6914153824 |               |               |
| C                                  | 6.0               | 1.1218505945          | 2.0065323645  | -0.9708883193 |               |               |
| O                                  | 8.0               | 0.9139646878          | 4.4090792473  | -0.6333696927 |               |               |

|                 |            |   |     |               |               |               |
|-----------------|------------|---|-----|---------------|---------------|---------------|
|                 |            | C | 6.0 | 4.8284482116  | 6.1471834271  | 1.1103193917  |
|                 |            | C | 6.0 | -0.0177940025 | -1.4564074881 | -0.1391739164 |
|                 |            | O | 8.0 | -4.5617768737 | -2.9561177180 | 0.2467578224  |
|                 |            | C | 6.0 | -2.3279092331 | -2.2058185299 | 0.1077563748  |
|                 |            | H | 1.0 | 3.3775248819  | 2.4969524312  | 0.5720098985  |
|                 |            | H | 1.0 | 4.0394473926  | 6.9026182870  | 1.1490264103  |
|                 |            | O | 8.0 | 3.1470628021  | 4.4955833098  | 1.0742772689  |
|                 |            | C | 6.0 | 2.5724901464  | 3.2308906579  | 0.6657141815  |
|                 |            | H | 1.0 | 5.1428414968  | 5.9505334784  | 2.1400971951  |
|                 |            | O | 8.0 | 0.2343499664  | 1.6692752842  | 0.1068385969  |
|                 |            | C | 6.0 | 0.0805227836  | -1.3017042872 | 1.2780531742  |
|                 |            | C | 6.0 | -2.2022985739 | -2.1191079488 | 1.5030411509  |
|                 |            | O | 8.0 | 1.8151793685  | 0.4850222999  | 1.3727684012  |
|                 |            | H | 1.0 | 2.1769847426  | -1.4803731771 | 1.4895268596  |
|                 |            | H | 1.0 | -3.9646367466 | -2.7179928860 | 1.7417115180  |
|                 |            | C | 6.0 | 1.5871023193  | 2.8290112775  | 1.7557531926  |
|                 |            | C | 6.0 | 0.8642300208  | 1.5364225695  | 1.3633332406  |
|                 |            | C | 6.0 | 1.3991242389  | -0.8082995761 | 1.8559519154  |
|                 |            | C | 6.0 | -0.9811181409 | -1.6765696399 | 2.0879023797  |
|                 |            | H | 1.0 | 0.8454147915  | 3.6240985259  | 1.8727520906  |
|                 |            | O | 8.0 | -3.2061550716 | -2.4388905862 | 2.3299006188  |
|                 |            | H | 1.0 | 2.1078252667  | 2.6914691856  | 2.7071628847  |
|                 |            | H | 1.0 | 1.5986281246  | -5.4292964906 | 3.7242127188  |
|                 |            | H | 1.0 | 0.0433913960  | 1.3296035729  | 2.0596455265  |
|                 |            | O | 8.0 | 1.1743798957  | -5.5502107748 | 4.5922514412  |
|                 |            | C | 6.0 | 1.4324793243  | -0.7710498837 | 3.3989348341  |
|                 |            | C | 6.0 | -0.8909182218 | -1.6642897133 | 3.5945586468  |
|                 |            | H | 1.0 | 1.0726985441  | 0.2060127279  | 3.7380836964  |
|                 |            | O | 8.0 | 1.6288692837  | -3.5915239358 | 2.8920558074  |
|                 |            | H | 1.0 | -1.2767058621 | -0.7221901704 | 4.0059695393  |
|                 |            | H | 1.0 | 2.4756284828  | -0.8584639020 | 3.7243998239  |
|                 |            | C | 6.0 | 1.0463705375  | -3.2419760817 | 3.9067003836  |
|                 |            | H | 1.0 | -1.5301845712 | -2.4489644093 | 4.0068063301  |
|                 |            | C | 6.0 | 0.7930371625  | -4.2684117422 | 5.0034710336  |
|                 |            | C | 6.0 | 0.5523687187  | -1.8021601991 | 4.1138135092  |
|                 |            | H | 1.0 | -0.2688841283 | -4.2389118832 | 5.2888696615  |
|                 |            | H | 1.0 | 1.3476680966  | -3.9468617374 | 5.9006231377  |
|                 |            | O | 8.0 | 0.4735682967  | -1.5241562230 | 5.5147439823  |
|                 |            | H | 1.0 | 1.3727579621  | -1.4038905405 | 5.8512239243  |
| Aclacinomycin X | NSC 670120 | H | 1.0 | -0.2713988734 | 10.3179677365 | 3.5902798120  |
|                 |            | H | 1.0 | 1.2734978703  | 11.4349715173 | 1.9880488749  |
|                 |            | C | 6.0 | 0.4026226600  | 9.7425675644  | 2.9650594822  |
|                 |            | C | 6.0 | 1.2668625354  | 10.3521786095 | 2.0699424625  |
|                 |            | O | 8.0 | -0.4756906174 | 7.8055098426  | 3.9660035666  |

|   |     |               |               |               |
|---|-----|---------------|---------------|---------------|
| C | 6.0 | 0.3787562633  | 8.3402418392  | 3.0862299501  |
| C | 6.0 | 2.1306700016  | 9.5902127058  | 1.2707014124  |
| H | 1.0 | 2.8118845884  | 10.0528474312 | 0.5662796456  |
| H | 1.0 | -0.3579878502 | 6.8244345184  | 3.9201478057  |
| C | 6.0 | 1.2475871145  | 7.5546565963  | 2.2837626109  |
| C | 6.0 | 2.1221814230  | 8.2055454995  | 1.3754220009  |
| O | 8.0 | 0.4491180475  | 5.5283646951  | 3.2109811618  |
| C | 6.0 | 1.2353691653  | 6.0985531292  | 2.3964592205  |
| C | 6.0 | 3.0505808501  | 7.4148458328  | 0.5141201691  |
| O | 8.0 | 3.8124236724  | 7.9658530727  | -0.2727554919 |
| C | 6.0 | 2.1337369123  | 5.3057945612  | 1.5650747076  |
| H | 1.0 | 0.7929915166  | 3.9259548271  | 2.9754975014  |
| C | 6.0 | 3.0165519232  | 5.9291587015  | 0.6476161088  |
| O | 8.0 | 1.3167178256  | 3.2365782385  | 2.4896589166  |
| C | 6.0 | 2.1318378567  | 3.8928531872  | 1.6537445826  |
| C | 6.0 | 3.8620805202  | 5.1646631553  | -0.1374791541 |
| H | 1.0 | 4.5261151602  | 5.6718802672  | -0.8291708599 |
| H | 1.0 | -2.7199902468 | 1.6084534089  | -0.4663208355 |
| H | 1.0 | -3.5294296923 | 1.4392457104  | -2.0192104706 |
| H | 1.0 | -1.9246736453 | 2.1981467920  | -1.9471762943 |
| H | 1.0 | -0.8000548652 | 1.4571888650  | 0.4047535486  |
| C | 6.0 | -2.5557817973 | 1.3936081171  | -1.5236559959 |
| C | 6.0 | 3.0092062292  | 3.1197391215  | 0.8545151013  |
| C | 6.0 | 3.8646587164  | 3.7594784336  | -0.0401598418 |
| H | 1.0 | 8.2476269759  | 4.8374102464  | 0.2987574691  |
| H | 1.0 | -1.2121834400 | -0.1882619439 | 0.9238514831  |
| C | 6.0 | -0.5344362509 | 0.4041890969  | 0.3024765116  |
| H | 1.0 | 0.8908179835  | 0.4043845427  | 1.9367426856  |
| H | 1.0 | 2.8038291470  | 1.3192946621  | 1.9961641307  |
| C | 6.0 | 2.9160136798  | 1.6124402430  | 0.9468023722  |
| O | 8.0 | 1.6875894423  | 1.2654233643  | 0.2508043873  |
| N | 7.0 | -1.9954399529 | 0.0544737208  | -1.7101474095 |
| H | 1.0 | 4.8345465904  | 3.3965317147  | -1.9096240002 |
| C | 6.0 | 4.8494867218  | 2.9756715731  | -0.9011019446 |
| C | 6.0 | 0.8843595545  | 0.2498455679  | 0.8523071947  |
| O | 8.0 | 6.9772224344  | 4.0035390480  | -1.1365884253 |
| H | 1.0 | 8.7342291542  | 4.9697959555  | -1.4236273345 |
| C | 6.0 | 6.2454966396  | 3.2151512254  | -0.3221959674 |
| C | 6.0 | 8.3000182235  | 4.3223048693  | -0.6629096626 |
| H | 1.0 | -3.0129994693 | -0.0801887746 | -3.5359635329 |
| O | 8.0 | 6.6554740725  | 2.7839239019  | 0.7356700480  |
| C | 6.0 | -0.6398433345 | -0.0819237977 | -1.1509068902 |
| H | 1.0 | 0.0676140303  | 0.5140874566  | -1.7624333066 |
| H | 1.0 | 2.5669937728  | 1.4130447617  | -1.4318704318 |

|   |     |               |               |               |
|---|-----|---------------|---------------|---------------|
| H | 1.0 | -5.7265849356 | -2.5307930155 | -1.8306842921 |
| H | 1.0 | -3.5001807177 | -1.9295989705 | -0.7123656505 |
| C | 6.0 | -2.0190960082 | -0.2933611324 | -3.1329355829 |
| H | 1.0 | -1.2859145036 | 0.2824093069  | -3.7295829140 |
| H | 1.0 | -4.9899862504 | -3.3929291695 | 0.5295119568  |
| C | 6.0 | 4.1270519390  | 0.9002691137  | 0.3400311469  |
| H | 1.0 | 4.9830264423  | 1.0383246286  | 1.0079044654  |
| O | 8.0 | 3.3881840627  | 1.3623779031  | -1.9494762494 |
| H | 1.0 | -2.7483729919 | -3.0184636430 | 1.3874841454  |
| C | 6.0 | 4.4926282913  | 1.4585319564  | -1.0443458022 |
| H | 1.0 | 8.8931067904  | 3.4124027911  | -0.5461823194 |
| H | 1.0 | -4.4585968467 | -1.9921218604 | -2.9452804796 |
| O | 8.0 | 1.4212399567  | -1.0371290040 | 0.6655388684  |
| C | 6.0 | -4.7457560314 | -2.7815280022 | -2.2480497926 |
| H | 1.0 | -6.6174902979 | -6.7188283108 | 2.7441117213  |
| C | 6.0 | -3.7047926643 | -2.9172348981 | -1.1449443438 |
| H | 1.0 | -1.8353914209 | -1.3593018814 | -3.2728171381 |
| C | 6.0 | -4.1355801657 | -3.8448934794 | 0.0044430622  |
| C | 6.0 | -0.1145111058 | -1.5357942503 | -1.1871588107 |
| H | 1.0 | 3.9016119599  | -0.1664685346 | 0.2863022991  |
| H | 1.0 | -5.9313657816 | -5.3539890090 | 0.9292810084  |
| O | 8.0 | -0.9241686233 | -2.3756201705 | -0.3605090401 |
| H | 1.0 | -5.0295842850 | -6.9647305222 | 3.4993955248  |
| C | 6.0 | -2.9682070285 | -4.0166019485 | 0.9921038122  |
| O | 8.0 | -3.2943461655 | -4.8083225835 | 2.1158860750  |
| H | 1.0 | 1.9305067278  | -0.9026998706 | -1.3435539889 |
| C | 6.0 | -5.8064622459 | -7.4388031744 | 2.8935865117  |
| C | 6.0 | 1.3409472748  | -1.5490401098 | -0.6771431859 |
| H | 1.0 | -4.8159079864 | -3.7156557957 | -2.8120467345 |
| H | 1.0 | -6.2148935549 | -8.2943523477 | 3.4368383147  |
| H | 1.0 | 5.9326851954  | 1.2558807430  | -2.6184520780 |
| C | 6.0 | 5.6648662349  | 0.7066995809  | -1.7067471434 |
| H | 1.0 | -0.1105111035 | -1.9134063322 | -2.2161654783 |
| H | 1.0 | 6.5329585511  | 0.7506463326  | -1.0405089123 |
| O | 8.0 | -2.5054848596 | -3.3898796192 | -1.7846672303 |
| H | 1.0 | -3.4930541155 | -5.7059704675 | 1.7927189788  |
| O | 8.0 | -4.5656746964 | -5.0963112384 | -0.5809648622 |
| C | 6.0 | -5.3724258925 | -5.9417950876 | 0.1817043449  |
| C | 6.0 | -1.3954111157 | -3.5843112175 | -0.9243789455 |
| C | 6.0 | -1.7367004147 | -4.5227123296 | 0.2336679007  |
| H | 1.0 | -0.8859129041 | -4.5971129689 | 0.9153791216  |
| N | 7.0 | -6.8433772018 | -5.8717886092 | -1.7462001300 |
| O | 8.0 | -4.5436598822 | -6.8951021855 | 0.8291173060  |
| C | 6.0 | -5.2301086093 | -7.9339699852 | 1.5634688681  |

|             |            |   |     |               |               |               |
|-------------|------------|---|-----|---------------|---------------|---------------|
|             |            | C | 6.0 | -6.3634515959 | -6.6473918891 | -0.7388517287 |
|             |            | H | 1.0 | 4.4965365387  | -0.8088837478 | -2.7309839452 |
|             |            | C | 6.0 | 1.9649849428  | -2.9350012614 | -0.6360081751 |
|             |            | C | 6.0 | -6.7872765929 | -7.9089394213 | -0.4491029830 |
|             |            | C | 6.0 | 5.3678238892  | -0.7490778795 | -2.0751453024 |
|             |            | H | 1.0 | 1.4076175428  | -3.5816527604 | 0.0456274746  |
|             |            | H | 1.0 | -0.6310515590 | -4.0215971250 | -1.5779885537 |
|             |            | H | 1.0 | 5.1748487333  | -1.3658460829 | -1.1914259756 |
|             |            | H | 1.0 | -6.2522279722 | -5.1111994245 | -2.0491995262 |
|             |            | H | 1.0 | 2.9962642665  | -2.8713220091 | -0.2795264709 |
|             |            | H | 1.0 | -1.9476029200 | -5.5170866073 | -0.1734462412 |
|             |            | C | 6.0 | -6.3062225374 | -8.6240640953 | 0.7135363088  |
|             |            | H | 1.0 | -7.4305650140 | -6.3008067299 | -2.4457609386 |
|             |            | H | 1.0 | -4.4544842950 | -8.6788918179 | 1.7601072858  |
|             |            | H | 1.0 | -7.5300939458 | -8.4086044236 | -1.0648351035 |
|             |            | H | 1.0 | 1.9749114211  | -3.3862517630 | -1.6332238569 |
|             |            | H | 1.0 | 6.2230004413  | -1.1891831271 | -2.5975672651 |
|             |            | O | 8.0 | -6.7240971481 | -9.7222091248 | 1.0701937954  |
|             |            | H | 1.0 | 6.1955225443  | -2.7142906328 | 1.0984376253  |
|             |            | H | 1.0 | 5.8712986380  | -2.6996655267 | -1.3431434774 |
|             |            | H | 1.0 | 4.4620575664  | -2.8111795504 | 0.7387311147  |
|             |            | C | 6.0 | 5.3445389721  | -2.1708231435 | 0.6759850280  |
|             |            | H | 1.0 | -1.8379507899 | -3.2231655764 | 1.4289739625  |
|             |            | C | 6.0 | 5.6294212953  | -1.7898183867 | -0.7789946509 |
|             |            | H | 1.0 | -1.3232228397 | -3.7084213893 | -0.2162927273 |
|             |            | H | 1.0 | -6.6176302270 | -1.7307806341 | 6.1614273520  |
|             |            | H | 1.0 | 8.6463998664  | -1.5588871912 | -5.0615263196 |
|             |            | H | 1.0 | -3.0410027067 | -3.4812755919 | 0.1740133011  |
|             |            | H | 1.0 | 6.5102929814  | -1.1407105439 | -0.8268049899 |
|             |            | H | 1.0 | 5.1756050220  | -1.2915088203 | 1.3059984352  |
|             |            | C | 6.0 | -2.0367746787 | -3.0929320765 | 0.3646269640  |
|             |            | H | 1.0 | -0.5524007770 | -1.5222696772 | 4.0678566591  |
|             |            | O | 8.0 | 3.3386270459  | -1.9774273809 | -1.4023465676 |
|             |            | H | 1.0 | 2.0158926997  | -1.6151263311 | 3.3947876468  |
|             |            | H | 1.0 | -0.0915987405 | -2.1920285767 | 1.9459189104  |
|             |            | H | 1.0 | -5.3947723969 | -1.5193072489 | 7.4211218563  |
|             |            | H | 1.0 | -4.8567497201 | -2.6951603753 | 3.9206870937  |
|             |            | H | 1.0 | -7.6061466053 | -1.0038957190 | 8.4700968727  |
|             |            | O | 8.0 | -2.4343409802 | -1.7598851106 | 3.4753630911  |
|             |            | O | 8.0 | 6.9060229905  | -1.2283467463 | -4.0793707403 |
|             |            | H | 1.0 | 2.5272676424  | -1.4421300842 | -1.4240728703 |
|             |            | H | 1.0 | 4.7479599384  | -1.9450433770 | -3.4587294782 |
|             |            | C | 6.0 | -6.1461961717 | -0.9958645430 | 6.8211332287  |
| Aclarubicin | 57576-44-0 | H | 1.0 | 6.1955225443  | -2.7142906328 | 1.0984376253  |
|             |            | H | 1.0 | 5.8712986380  | -2.6996655267 | -1.3431434774 |
|             |            | H | 1.0 | 4.4620575664  | -2.8111795504 | 0.7387311147  |
|             |            | C | 6.0 | 5.3445389721  | -2.1708231435 | 0.6759850280  |
|             |            | H | 1.0 | -1.8379507899 | -3.2231655764 | 1.4289739625  |
|             |            | C | 6.0 | 5.6294212953  | -1.7898183867 | -0.7789946509 |
|             |            | H | 1.0 | -1.3232228397 | -3.7084213893 | -0.2162927273 |
|             |            | H | 1.0 | -6.6176302270 | -1.7307806341 | 6.1614273520  |
|             |            | H | 1.0 | 8.6463998664  | -1.5588871912 | -5.0615263196 |
|             |            | H | 1.0 | -3.0410027067 | -3.4812755919 | 0.1740133011  |
|             |            | H | 1.0 | 6.5102929814  | -1.1407105439 | -0.8268049899 |
|             |            | H | 1.0 | 5.1756050220  | -1.2915088203 | 1.3059984352  |
|             |            | C | 6.0 | -2.0367746787 | -3.0929320765 | 0.3646269640  |
|             |            | H | 1.0 | -0.5524007770 | -1.5222696772 | 4.0678566591  |
|             |            | O | 8.0 | 3.3386270459  | -1.9774273809 | -1.4023465676 |
|             |            | H | 1.0 | 2.0158926997  | -1.6151263311 | 3.3947876468  |
|             |            | H | 1.0 | -0.0915987405 | -2.1920285767 | 1.9459189104  |
|             |            | H | 1.0 | -5.3947723969 | -1.5193072489 | 7.4211218563  |
|             |            | H | 1.0 | -4.8567497201 | -2.6951603753 | 3.9206870937  |
|             |            | H | 1.0 | -7.6061466053 | -1.0038957190 | 8.4700968727  |
|             |            | O | 8.0 | -2.4343409802 | -1.7598851106 | 3.4753630911  |
|             |            | O | 8.0 | 6.9060229905  | -1.2283467463 | -4.0793707403 |
|             |            | H | 1.0 | 2.5272676424  | -1.4421300842 | -1.4240728703 |
|             |            | H | 1.0 | 4.7479599384  | -1.9450433770 | -3.4587294782 |
|             |            | C | 6.0 | -6.1461961717 | -0.9958645430 | 6.8211332287  |

|   |     |               |               |               |
|---|-----|---------------|---------------|---------------|
| C | 6.0 | 8.2378104649  | -0.7886808698 | -4.4085662622 |
| H | 1.0 | -1.8445668809 | -0.1119520327 | 5.5719704042  |
| C | 6.0 | 4.4601231239  | -1.0947232092 | -1.5055192002 |
| H | 1.0 | -4.3675153530 | -3.0226720216 | 2.2452925725  |
| C | 6.0 | -1.3336788219 | -0.8839857239 | 3.6375599334  |
| H | 1.0 | 8.8416784037  | -0.6899055517 | -3.5036134413 |
| H | 1.0 | 0.0602492204  | -1.7499098066 | -0.4832815712 |
| C | 6.0 | -7.1944623085 | -0.3222070896 | 7.7215304543  |
| H | 1.0 | -8.0437565426 | 0.0139307590  | 7.1070300560  |
| H | 1.0 | 1.9429034950  | -1.3355860288 | 0.9102977167  |
| C | 6.0 | 2.0075753781  | -0.6201252138 | 2.9387802080  |
| C | 6.0 | -4.6973320152 | -2.2461562710 | 2.9383030304  |
| C | 6.0 | -0.0937288971 | -1.1635920049 | 1.5667316386  |
| O | 8.0 | -4.4265037091 | -0.5677023180 | 5.2341471070  |
| H | 1.0 | 3.0405461744  | -0.2712948231 | 2.8600222175  |
| C | 6.0 | 4.7963443891  | -0.9421563281 | -3.0270518168 |
| H | 1.0 | 8.2064685046  | 0.1753279814  | -4.9210299426 |
| N | 7.0 | -1.9967016925 | -1.6753137951 | -0.0009282559 |
| C | 6.0 | -1.6657710254 | 0.2847053577  | 4.5671738471  |
| C | 6.0 | 6.2032242216  | -0.3977409376 | -3.2813469659 |
| C | 6.0 | -3.6550490899 | -1.1411356483 | 3.0250940374  |
| H | 1.0 | 3.9232018666  | 0.2305793710  | 0.1423482029  |
| C | 6.0 | 1.3652117845  | -0.6629314096 | 1.5610766294  |
| C | 6.0 | -0.6347827435 | -1.1291923489 | 0.1181584276  |
| H | 1.0 | -1.9498811405 | -1.9373419733 | -2.1421121654 |
| C | 6.0 | -5.4128853113 | 0.0464962803  | 5.9885984127  |
| H | 1.0 | 1.4636291415  | 0.0688107171  | 3.5891414237  |
| H | 1.0 | -0.8221647415 | 0.9779589257  | 4.6099359970  |
| O | 8.0 | -0.8905420490 | -0.3305963182 | 2.4109438214  |
| H | 1.0 | -3.5477957249 | -1.9799814571 | -1.3664331950 |
| C | 6.0 | 4.1329353085  | 0.2911798106  | -0.9273063872 |
| H | 1.0 | -6.1102215990 | 0.6011323105  | 5.3383849351  |
| H | 1.0 | -5.6490301471 | -1.8433021684 | 2.5756312427  |
| C | 6.0 | -2.5674690669 | -1.4965519467 | -1.3360243523 |
| C | 6.0 | -4.0717568890 | 0.0084467183  | 3.9582051971  |
| H | 1.0 | -3.4787962396 | -0.7178235985 | 2.0278541189  |
| H | 1.0 | 4.4401192671  | -0.8255738950 | -5.7175826591 |
| H | 1.0 | 5.0011083528  | 0.9419902245  | -1.0710934802 |
| C | 6.0 | -6.6826793666 | 0.9208126453  | 8.4387274657  |
| O | 8.0 | 1.6890273311  | 0.2520264231  | -1.2600776293 |
| O | 8.0 | 6.6444163361  | 0.6483328253  | -2.8523135786 |
| C | 6.0 | 3.8223237438  | -0.0471640131 | -3.7859634469 |
| C | 6.0 | -2.9223235078 | 1.0208191120  | 4.0882426274  |
| O | 8.0 | -7.1166070792 | 1.2794029869  | 9.5153186619  |

|   |     |               |               |                |
|---|-----|---------------|---------------|----------------|
| O | 8.0 | -4.7695021184 | 0.9707283200  | 6.8891615351   |
| H | 1.0 | -7.0578893473 | 2.5430818025  | 6.2030799689   |
| C | 6.0 | 3.7991646070  | -0.1257026757 | -5.1921847088  |
| O | 8.0 | 1.4491350399  | 0.6774521224  | 1.0433614222   |
| H | 1.0 | -3.5410200486 | 1.8034138597  | 5.7561872042   |
| C | 6.0 | 2.9245650613  | 0.9310053993  | -1.6137627513  |
| H | 1.0 | -4.9548691778 | 0.5096671337  | 3.5355550483   |
| C | 6.0 | -0.5232867375 | 0.3208879411  | -0.3766150752  |
| H | 1.0 | -2.7207786183 | -0.4398036991 | -1.5617207337  |
| C | 6.0 | 0.8998434956  | 0.8629880072  | -0.2377710262  |
| O | 8.0 | -3.2480007148 | 2.1388412139  | 4.8895447987   |
| H | 1.0 | -0.7969281176 | 0.4189575878  | -1.4280209932  |
| C | 6.0 | 2.9959110762  | 0.8580730341  | -3.1233819365  |
| C | 6.0 | -5.6409795135 | 1.7736871842  | 7.7016686415   |
| H | 1.0 | -2.7341909060 | 1.4177191696  | 3.0842593589   |
| H | 1.0 | -1.1927548685 | 0.9493341516  | 0.2178165204   |
| C | 6.0 | -6.3085611410 | 2.9100389773  | 6.9112993966   |
| H | 1.0 | 2.8361581080  | 1.9776337038  | -1.3033785022  |
| O | 8.0 | 3.7076471797  | -0.2240601235 | -7.9942170653  |
| C | 6.0 | 2.9618022920  | 0.6883415441  | -5.9351954658  |
| H | 1.0 | -4.9905186250 | 2.2085243631  | 8.4654419217   |
| H | 1.0 | -5.5465395278 | 3.4546944517  | 6.3475822784   |
| H | 1.0 | -6.8050012518 | 3.5957050413  | 7.6028755511   |
| H | 1.0 | 0.9120717799  | 1.9465591504  | -0.3975682845  |
| C | 6.0 | 2.9715957675  | 0.5724823509  | -7.4225111011  |
| C | 6.0 | 2.1265447548  | 1.6865424220  | -3.8741300454  |
| C | 6.0 | 2.1075237981  | 1.6162668575  | -5.2880182168  |
| O | 8.0 | 1.3386010309  | 2.5312402493  | -3.1963712086  |
| H | 1.0 | 2.6931241794  | 0.6589391535  | -10.0555489669 |
| C | 6.0 | 2.0514529076  | 1.4638718326  | -8.1893651024  |
| C | 6.0 | 2.0361283260  | 1.3743309810  | -9.5750845510  |
| H | 1.0 | 0.8172388652  | 3.0378447416  | -3.8725208745  |
| C | 6.0 | 1.2185889859  | 2.4787321701  | -6.0575544212  |
| C | 6.0 | 1.2077352807  | 2.3842151257  | -7.5151017229  |
| C | 6.0 | 1.1791262546  | 2.2012486268  | -10.3147331382 |
| O | 8.0 | 0.4597305685  | 3.3041115463  | -5.4664153388  |
| H | 1.0 | 1.1667211397  | 2.1310221495  | -11.3982991016 |
| C | 6.0 | 0.3458847130  | 3.2153328598  | -8.2782581662  |
| C | 6.0 | 0.3450850587  | 3.1089279542  | -9.6819478320  |
| O | 8.0 | -0.4800382534 | 4.1082941111  | -7.7208745397  |
| H | 1.0 | -0.3229552168 | 3.7560112975  | -10.2399122612 |
| H | 1.0 | -0.3505910002 | 4.0470012913  | -6.7421601284  |

|                         |            |               |               |               |               |               |
|-------------------------|------------|---------------|---------------|---------------|---------------|---------------|
| Adriamycin 14-octanoate | 51898-39-6 | H             | 1.0           | 5.8918845272  | 1.1063231062  | -1.7508609126 |
|                         |            | O             | 8.0           | 6.4309807628  | -1.3853261070 | -1.5039537114 |
|                         |            | H             | 1.0           | 4.2130010362  | 0.8719841807  | -1.2214052890 |
|                         |            | C             | 6.0           | 5.2597672369  | 0.6736829267  | -0.9707811073 |
|                         |            | H             | 1.0           | 4.8698083862  | -3.3225565572 | -1.2049849733 |
|                         |            | H             | 1.0           | 6.1874391070  | 3.2424070332  | -0.3294295358 |
|                         |            | H             | 1.0           | 0.1780434896  | -2.0529232557 | -4.5761091420 |
|                         |            | C             | 6.0           | 5.4939557562  | -0.8195980935 | -0.9888819198 |
|                         |            | H             | 1.0           | 4.7333682992  | 5.3634511830  | -0.3911708940 |
|                         |            | H             | 1.0           | 5.5623544199  | -3.1379864143 | 0.4069774273  |
|                         |            | H             | 1.0           | 3.2476054882  | 7.4995062603  | -0.4958935126 |
|                         |            | H             | 1.0           | 3.7151665632  | 3.0945053715  | -0.7595047854 |
|                         |            | O             | 8.0           | 0.6834507945  | -2.2675874132 | -3.7424585881 |
|                         |            | H             | 1.0           | -2.8290641618 | -0.3897601520 | -6.6334961967 |
|                         |            | O             | 8.0           | -1.0930872165 | -1.3196806360 | -5.2977296089 |
|                         |            | H             | 1.0           | 2.2688296505  | 5.1960681827  | -0.8584937198 |
|                         |            | C             | 6.0           | 4.6887106813  | -2.9067044733 | -0.2062296462 |
|                         |            | C             | 6.0           | 5.5124374435  | 2.8237859934  | 0.4301971562  |
|                         |            | O             | 8.0           | 4.5150547241  | -1.4806075057 | -0.3055295875 |
|                         |            | C             | 6.0           | 4.0440753842  | 4.9186643335  | 0.3408439590  |
|                         |            | C             | 6.0           | 5.6077870480  | 1.2907089272  | 0.4012555774  |
|                         |            | H             | 1.0           | 1.7168095121  | -3.5694178376 | -1.8735673731 |
|                         |            | H             | 1.0           | 2.6111620835  | -2.0763367051 | -1.6414882642 |
|                         |            | H             | 1.0           | 6.6293063202  | 0.9929124593  | 0.6669609898  |
|                         |            | C             | 6.0           | 4.1008690058  | 3.3902340450  | 0.2253558891  |
|                         |            | C             | 6.0           | 2.5942787125  | 7.0258139537  | 0.2456536121  |
|                         |            | C             | 6.0           | 2.6404131962  | 5.4993995612  | 0.1297966600  |
|                         |            | H             | 1.0           | -4.9272193958 | 0.8986605895  | -7.1121219998 |
|                         |            | H             | 1.0           | 1.5808406005  | 7.4087194512  | 0.0881811984  |
|                         |            | C             | 6.0           | -3.3953788148 | 0.0841378939  | -5.8412175432 |
|                         |            | C             | 6.0           | -1.6828489063 | -0.8143408521 | -4.3174493616 |
|                         |            | H             | 1.0           | 5.8958100426  | 3.1712401972  | 1.3986819767  |
|                         |            | C             | 6.0           | -0.0020211671 | -1.7025597141 | -2.7415277567 |
|                         |            | C             | 6.0           | 1.7784062701  | -2.6717450655 | -1.2512494065 |
|                         |            | H             | 1.0           | 4.4173048705  | 5.2220551507  | 1.3294311108  |
|                         |            | C             | 6.0           | 3.4793094313  | -3.6136547591 | 0.4148632723  |
|                         |            | H             | 1.0           | 2.9250082543  | 7.3586498452  | 1.2359977734  |
|                         |            | C             | 6.0           | -4.5584437060 | 0.7998726688  | -6.0955966518 |
|                         |            | H             | 1.0           | 4.9479004262  | 0.8625313468  | 1.1654567032  |
|                         |            | H             | 1.0           | 3.4206937700  | 2.9439786999  | 0.9651619131  |
| C                       | 6.0        | -2.9332937669 | -0.0357728750 | -4.5286255177 |               |               |
| H                       | 1.0        | 1.9513795910  | 5.0554959033  | 0.8610344008  |               |               |
| C                       | 6.0        | -1.1782176829 | -0.9665164353 | -2.9644813338 |               |               |
| O                       | 8.0        | 3.7026840139  | -4.6244006644 | 1.0449254015  |               |               |



|   |     |               |               |               |
|---|-----|---------------|---------------|---------------|
| C | 6.0 | 0.5074797488  | -1.8712270132 | -1.4197537386 |
| C | 6.0 | 2.0287707120  | -3.1033107058 | 0.2086818345  |
| O | 8.0 | 1.1606120415  | -4.1795317527 | 0.5044622551  |
| H | 1.0 | 2.4501395151  | -1.0843340512 | 0.8794443415  |
| C | 6.0 | -5.2629197950 | 1.3966679505  | -5.0536707595 |
| C | 6.0 | -3.6238210544 | 0.5582548343  | -3.4433147381 |
| C | 6.0 | -1.8690240079 | -0.3727448323 | -1.8699521457 |
| H | 1.0 | -6.1667998567 | 1.9492174079  | -5.2748551823 |
| H | 1.0 | 0.5032056218  | -3.8776593515 | 1.1507460945  |
| C | 6.0 | 1.7824536254  | -1.9060423358 | 1.1526226516  |
| C | 6.0 | -0.1599977539 | -1.2841545842 | -0.3574841927 |
| C | 6.0 | -4.8137112909 | 1.2880427346  | -3.7275248483 |
| C | 6.0 | -3.0959914442 | 0.4046861980  | -2.0643752557 |
| H | 1.0 | 1.9899943601  | -2.1872669447 | 2.1878440706  |
| C | 6.0 | -1.3556881663 | -0.5366371716 | -0.5723432770 |
| C | 6.0 | 0.3301975131  | -1.4293387428 | 1.0682902758  |
| H | 1.0 | 0.2320294164  | -0.4655988358 | 1.5782743768  |
| O | 8.0 | -5.4718725575 | 1.8535517731  | -2.6942510206 |
| H | 1.0 | -6.4793804902 | 3.4520705632  | -3.5925450946 |
| O | 8.0 | -3.6692310682 | 0.9177828405  | -1.0788003456 |
| O | 8.0 | -0.5525174855 | -2.3767080909 | 1.7252652199  |
| O | 8.0 | -1.9462172409 | 0.0045500847  | 0.4995915389  |
| H | 1.0 | -3.1000783277 | -3.6213797623 | 5.2161332545  |
| C | 6.0 | -6.6639304647 | 2.5876093736  | -2.9432699489 |
| H | 1.0 | -7.4424022592 | 1.9567144825  | -3.3891532815 |
| H | 1.0 | -2.7506481801 | 0.4870411565  | 0.1392806058  |
| H | 1.0 | 0.8026668902  | -2.0889775492 | 5.7730080842  |
| H | 1.0 | -2.9372125466 | -2.9004003338 | 2.7576343992  |
| C | 6.0 | -2.4929053427 | -2.7552802170 | 4.8872437336  |
| C | 6.0 | -0.9897814488 | -2.0154483258 | 3.0101003642  |
| H | 1.0 | -4.1484086985 | -1.5716579099 | 4.6182857227  |
| H | 1.0 | -6.9984675289 | 2.9361639130  | -1.9661077430 |
| N | 7.0 | -3.2139720860 | -1.4864418579 | 5.0090551013  |
| C | 6.0 | -2.0762581533 | -2.9972656169 | 3.4275952230  |
| H | 1.0 | -0.8110891525 | -3.7495454001 | 5.7537017107  |
| C | 6.0 | -0.1206681286 | -1.7943233893 | 5.2628611499  |
| H | 1.0 | -1.3719350246 | -0.9874788265 | 2.9915286523  |
| O | 8.0 | 0.1356936123  | -2.1081396605 | 3.8837963307  |
| C | 6.0 | -1.2328973173 | -2.7338067415 | 5.7768962788  |
| H | 1.0 | 0.5227298749  | 0.2543714132  | 5.1168279145  |
| H | 1.0 | -1.2514839405 | 0.0652334998  | 5.0435242561  |
| C | 6.0 | -0.3354747817 | -0.2999628138 | 5.5092701547  |
| H | 1.0 | -3.3097815283 | -1.2596314216 | 5.9960485310  |
| H | 1.0 | -1.6773260549 | -4.0118056930 | 3.3144414166  |

|         |            |   |     |               |               |               |
|---------|------------|---|-----|---------------|---------------|---------------|
|         |            | O | 8.0 | -1.5402016256 | -2.3554387798 | 7.1200356330  |
|         |            | H | 1.0 | -0.4044675769 | -0.1152365246 | 6.5845697965  |
|         |            | H | 1.0 | -2.0109505093 | -3.0909901932 | 7.5337786150  |
|         |            | H | 1.0 | 4.9786410930  | -0.5111178516 | -5.0094058534 |
|         |            | H | 1.0 | 2.3995311219  | -3.3392588447 | -2.1565787019 |
|         |            | C | 6.0 | 4.9740848183  | -0.3687210602 | -3.9295050616 |
|         |            | H | 1.0 | 2.9381181943  | -5.1435695844 | -0.5583688619 |
|         |            | O | 8.0 | 3.6192865064  | -0.6258422300 | -3.5125207378 |
|         |            | H | 1.0 | 5.2658291838  | 0.6521751174  | -3.6732793427 |
|         |            | H | 1.0 | 5.6615377845  | -1.0660112070 | -3.4452676574 |
|         |            | H | 1.0 | 3.6339039083  | -2.7893381855 | -1.0252526463 |
|         |            | C | 6.0 | 2.5800436596  | -3.0768542054 | -1.1061915076 |
|         |            | H | 1.0 | 1.4324532667  | -1.1106045074 | -2.7769451772 |
|         |            | C | 6.0 | 2.3101946095  | -4.3070340953 | -0.2359042115 |
|         |            | H | 1.0 | 1.2644304843  | -4.6117256444 | -0.3145827974 |
|         |            | C | 6.0 | 3.3845024783  | -0.4862745315 | -2.1910510240 |
|         |            | C | 6.0 | 1.9121625900  | -0.7438033627 | -1.8660530076 |
|         |            | H | 1.0 | 2.5330051054  | -4.1212760653 | 0.8196589644  |
|         |            | C | 6.0 | 1.7045925238  | -1.8499674085 | -0.7784163843 |
|         |            | H | 1.0 | 1.3515583739  | 1.3076610591  | -3.5552354965 |
|         |            | O | 8.0 | 0.3444552432  | -2.2849697016 | -0.8695790173 |
|         |            | O | 8.0 | 4.2413129202  | -0.1757164616 | -1.3895386341 |
|         |            | H | 1.0 | -0.1882258212 | -1.7428115558 | -0.2636129176 |
|         |            | O | 8.0 | 0.6858897769  | 3.4759750143  | -4.5216812212 |
|         |            | C | 6.0 | 1.0931714672  | 1.5445349338  | -2.5286634166 |
|         |            | C | 6.0 | 1.2890350866  | 0.5994847268  | -1.5025437118 |
|         |            | H | 1.0 | -4.8058284311 | -2.9589688156 | 0.5042228127  |
|         |            | H | 1.0 | -0.1906638668 | -5.1367267409 | 3.1833401830  |
|         |            | C | 6.0 | 2.0060781153  | -1.2510775932 | 0.6046313128  |
|         |            | H | 1.0 | 3.0381688429  | -0.8869287869 | 0.6087395146  |
|         |            | H | 1.0 | 1.9052207450  | -2.0032806444 | 1.3893959862  |
|         |            | H | 1.0 | -0.3190624781 | -3.1769990320 | 1.6457993802  |
|         |            | H | 1.0 | -2.3928725887 | -4.0800482176 | 2.2629910576  |
|         |            | H | 1.0 | -4.4355915294 | -4.0671697286 | 1.8453561596  |
|         |            | C | 6.0 | -4.8833364359 | -3.1029681435 | 1.5968698341  |
|         |            | H | 1.0 | -2.5917828381 | -1.9964548737 | 1.0092568315  |
|         |            | C | 6.0 | 0.3894088743  | 3.7682648090  | -3.3685206197 |
|         |            | H | 1.0 | -5.9438867778 | -3.1547809026 | 1.8585075497  |
|         |            | C | 6.0 | 0.5730628980  | 2.7967047941  | -2.2513374347 |
|         |            | H | 1.0 | 1.1883435102  | -4.0481472007 | 3.4397560743  |
|         |            | H | 1.0 | -0.0770908668 | 5.7538245532  | -5.0593321662 |
|         |            | C | 6.0 | 0.1027759162  | -4.1414756322 | 3.5311324867  |
|         |            | C | 6.0 | 0.9537271777  | 0.9168818731  | -0.1876804467 |
| Aklavin | 60504-57-6 |   |     |               |               |               |

|                              |            |   |     |               |               |               |
|------------------------------|------------|---|-----|---------------|---------------|---------------|
|                              |            | C | 6.0 | -0.5888759333 | -3.0664420816 | 2.7060292009  |
|                              |            | C | 6.0 | 1.0766450260  | -0.0830068874 | 0.9415033441  |
|                              |            | H | 1.0 | -4.9231640811 | -0.3985825705 | 1.1092603055  |
|                              |            | O | 8.0 | -0.2800231341 | -0.5369851221 | 1.2010572435  |
|                              |            | C | 6.0 | -2.1169217804 | -3.1513916558 | 2.7911866704  |
|                              |            | C | 6.0 | -2.7942647720 | -1.9441388698 | 2.0942621958  |
|                              |            | H | 1.0 | -0.1764219976 | -4.0417440828 | 4.5816630831  |
|                              |            | C | 6.0 | -0.3474158399 | 6.0367543255  | -4.0488070507 |
|                              |            | N | 7.0 | -4.2504286895 | -2.0215824369 | 2.3563234380  |
|                              |            | C | 6.0 | -0.1676602303 | 5.1112954107  | -3.0292014469 |
|                              |            | C | 6.0 | 0.2232902603  | 3.1477967345  | -0.9230245138 |
|                              |            | C | 6.0 | -4.9853839006 | -0.7739203897 | 2.1467389534  |
|                              |            | H | 1.0 | 1.4392241931  | 0.4284259678  | 1.8395132595  |
|                              |            | C | 6.0 | 0.4084470051  | 2.1911350532  | 0.1041225629  |
|                              |            | H | 1.0 | -6.0409213420 | -0.9483716926 | 2.3745569152  |
|                              |            | O | 8.0 | -0.0804913142 | -1.8042989191 | 3.1802360920  |
|                              |            | O | 8.0 | -2.5338830126 | -3.2079053687 | 4.1428576272  |
|                              |            | C | 6.0 | -0.6458783052 | -0.6718403723 | 2.5762924204  |
|                              |            | C | 6.0 | -2.1721475462 | -0.6560228308 | 2.6519919260  |
|                              |            | H | 1.0 | -2.5224980897 | 0.2301348877  | 2.1190609017  |
|                              |            | H | 1.0 | -1.0090241329 | 8.0278077542  | -4.5493550889 |
|                              |            | H | 1.0 | -4.6303968674 | 0.0076391966  | 2.8196177255  |
|                              |            | C | 6.0 | -0.8683672555 | 7.3040033841  | -3.7521540144 |
|                              |            | H | 1.0 | -3.4531605437 | -2.8844262034 | 4.1210839137  |
|                              |            | C | 6.0 | -0.5058688953 | 5.4365928612  | -1.6900331346 |
|                              |            | C | 6.0 | -0.3204670645 | 4.4651325057  | -0.6153532541 |
|                              |            | H | 1.0 | -0.2322362170 | 0.1826348800  | 3.1232294872  |
|                              |            | O | 8.0 | 0.0879690006  | 2.4496886783  | 1.3786859087  |
|                              |            | H | 1.0 | -2.4432889470 | -0.5594521673 | 3.7079911425  |
|                              |            | H | 1.0 | -0.2534073953 | 3.3816344292  | 1.4026164096  |
|                              |            | C | 6.0 | -1.2072206853 | 7.6479231340  | -2.4533205829 |
|                              |            | O | 8.0 | -0.6298588833 | 4.7660742959  | 0.5766128881  |
|                              |            | C | 6.0 | -1.0327083143 | 6.7240831536  | -1.4055680024 |
|                              |            | H | 1.0 | -1.6109192227 | 8.6241710535  | -2.2078154284 |
|                              |            | H | 1.0 | -1.1903938336 | 6.3447836930  | 0.4291294528  |
|                              |            | O | 8.0 | -1.3764549325 | 7.1089380405  | -0.1711831007 |
|                              |            | H | 1.0 | 7.3542139530  | -1.4272334406 | 2.4109184099  |
|                              |            | H | 1.0 | 7.3802480993  | -1.9998916822 | 0.0260258414  |
|                              |            | H | 1.0 | 7.3912019085  | -1.5333340267 | -2.2033840326 |
|                              |            | H | 1.0 | 6.7345104169  | -3.1555906218 | -1.8258993713 |
|                              |            | C | 6.0 | 6.4803902773  | -1.2146974106 | 1.8023445818  |
|                              |            | C | 6.0 | 6.4965904275  | -1.5399870402 | 0.4489444744  |
|                              |            | C | 6.0 | 6.5092658459  | -2.1811451300 | -2.2760037229 |
| 2'-Bromo-4'-epi-daunorubicin | NSC 650931 | H | 1.0 | 7.3542139530  | -1.4272334406 | 2.4109184099  |
|                              |            | H | 1.0 | 7.3802480993  | -1.9998916822 | 0.0260258414  |
|                              |            | H | 1.0 | 7.3912019085  | -1.5333340267 | -2.2033840326 |
|                              |            | H | 1.0 | 6.7345104169  | -3.1555906218 | -1.8258993713 |
|                              |            | C | 6.0 | 6.4803902773  | -1.2146974106 | 1.8023445818  |
|                              |            | C | 6.0 | 6.4965904275  | -1.5399870402 | 0.4489444744  |
|                              |            | C | 6.0 | 6.5092658459  | -2.1811451300 | -2.2760037229 |

|    |      |               |               |               |
|----|------|---------------|---------------|---------------|
| H  | 1.0  | 6.2498957047  | -2.3202935392 | -3.3255498607 |
| H  | 1.0  | 5.3215916285  | -0.3605656141 | 3.4218924139  |
| C  | 6.0  | 5.3595296739  | -0.6239632744 | 2.3720817402  |
| C  | 6.0  | 5.3836310613  | -1.2780166822 | -0.3667976495 |
| O  | 8.0  | 5.3658249709  | -1.5799425834 | -1.6814408046 |
| C  | 6.0  | 4.2429380136  | -0.3565982194 | 1.5769353545  |
| C  | 6.0  | 4.2235017656  | -0.6732934399 | 0.1966667816  |
| O  | 8.0  | 3.1213914336  | 0.5446948993  | 3.4608832658  |
| C  | 6.0  | 3.0719227991  | 0.2766190097  | 2.2403991574  |
| C  | 6.0  | 3.0149504035  | -0.3688709382 | -0.6093894910 |
| O  | 8.0  | 2.9580612912  | -0.6290060383 | -1.8301755300 |
| C  | 6.0  | 1.8913535275  | 0.5692653598  | 1.4453509984  |
| H  | 1.0  | 1.6553678539  | 1.2117224887  | 3.7179999507  |
| C  | 6.0  | 1.8655523006  | 0.2543447478  | 0.0573291579  |
| H  | 1.0  | 1.5119282786  | -0.1263298526 | -2.2464019544 |
| O  | 8.0  | 0.7625530739  | 1.4831080116  | 3.3633382127  |
| C  | 6.0  | 0.7767498959  | 1.1715137720  | 2.0613185383  |
| C  | 6.0  | 0.7107925336  | 0.5485304316  | -0.6959227724 |
| O  | 8.0  | 0.6265763053  | 0.2811917920  | -2.0060082187 |
| C  | 6.0  | -0.3760021370 | 1.4633424004  | 1.2881565060  |
| C  | 6.0  | -0.4079297449 | 1.1494331575  | -0.0609949468 |
| H  | 1.0  | -1.2576673881 | -2.9110028985 | -1.8972884387 |
| H  | 1.0  | -0.8303127862 | -1.8088198340 | -3.2342759143 |
| H  | 1.0  | -2.8774086924 | -3.6145801344 | 0.7577452300  |
| H  | 1.0  | -1.5397709260 | -3.4007676261 | -3.5719793276 |
| H  | 1.0  | -1.7840236508 | -1.0740499007 | -0.6284373335 |
| C  | 6.0  | -1.5529569529 | -2.5495909242 | -2.8823458818 |
| H  | 1.0  | -3.0695054083 | -4.5856192460 | -0.5470600021 |
| N  | 7.0  | -2.9174346302 | -3.6222635331 | -0.2589507888 |
| H  | 1.0  | -1.3699719136 | 2.4485998070  | 2.9114450071  |
| O  | 8.0  | -0.2717561310 | 4.7634804550  | 0.8747243475  |
| C  | 6.0  | -1.5907850857 | 2.1063077888  | 1.8968244286  |
| H  | 1.0  | -1.4947428496 | 1.4242212464  | -1.9019836443 |
| C  | 6.0  | -1.6582596218 | 1.5353513546  | -0.8282900388 |
| H  | 1.0  | -2.3834291358 | 1.3512519200  | 1.9525449244  |
| C  | 6.0  | -1.3495890959 | 4.5415604091  | 1.3929441799  |
| C  | 6.0  | -2.7485948969 | -0.6022031317 | -0.8541400045 |
| H  | 1.0  | -1.2521097639 | 3.6238830607  | -0.9141196491 |
| BR | 35.0 | -3.6801063560 | -1.3408485448 | 1.7917969971  |
| H  | 1.0  | -1.2295620080 | 6.2555335568  | 2.6665783033  |
| O  | 8.0  | -2.7899012052 | 0.7225868621  | -0.4404058201 |
| C  | 6.0  | -2.9481546254 | -1.9256061685 | -2.8768080374 |
| C  | 6.0  | -2.1571171329 | 3.2699455038  | 1.0223202977  |
| C  | 6.0  | -2.0294863279 | 2.9816311506  | -0.4935561036 |

|             |                            |   |     |               |               |               |
|-------------|----------------------------|---|-----|---------------|---------------|---------------|
|             |                            | C | 6.0 | -4.0389945029 | -2.7936205904 | -0.7037712340 |
|             |                            | H | 1.0 | -2.1844784727 | 4.9157958914  | 3.3601103884  |
|             |                            | O | 8.0 | -2.9933189581 | -0.6181348392 | -2.2630472097 |
|             |                            | C | 6.0 | -1.9423762150 | 5.4620002721  | 2.4410791447  |
|             |                            | C | 6.0 | -3.8965582109 | -1.3552433364 | -0.1837812577 |
|             |                            | H | 1.0 | -4.0571351926 | -3.7821393190 | -2.6345471497 |
|             |                            | C | 6.0 | -4.0913971195 | -2.7518242034 | -2.2588929441 |
|             |                            | H | 1.0 | -3.2403209950 | -1.7231171942 | -3.9130877492 |
|             |                            | H | 1.0 | -5.0213308458 | -3.1657270692 | -0.3737517639 |
|             |                            | H | 1.0 | -2.9850472977 | 3.2267654029  | -0.9634454710 |
|             |                            | H | 1.0 | -3.7138103533 | 3.1886278925  | 2.2212843624  |
|             |                            | H | 1.0 | -4.8175926740 | -0.7968540241 | -0.3501237585 |
|             |                            | O | 8.0 | -3.5430981279 | 3.4648077655  | 1.3114387526  |
|             |                            | H | 1.0 | -2.8803582829 | 5.8863559674  | 2.0709422428  |
|             |                            | O | 8.0 | -5.3427737291 | -2.2154061682 | -2.6763190454 |
|             |                            | H | 1.0 | -5.2364538704 | -1.2522040834 | -2.6813715934 |
| Cinerubin A | NSC 243022 /<br>34044-10-5 | H | 1.0 | 8.6792426136  | 0.5238216094  | -5.7700783716 |
|             |                            | H | 1.0 | 6.9848068025  | 0.4708190807  | -5.2358525703 |
|             |                            | C | 6.0 | 7.9881339309  | 0.8182054948  | -4.9756683856 |
|             |                            | H | 1.0 | 7.9734730476  | 1.9115418069  | -4.9257189422 |
|             |                            | H | 1.0 | 8.4513692298  | -0.9058864366 | -3.7709004217 |
|             |                            | O | 8.0 | 10.8077693454 | 0.0401431481  | -3.7814015170 |
|             |                            | C | 6.0 | 8.4275459797  | 0.1803388943  | -3.6490555149 |
|             |                            | C | 6.0 | 9.8566642809  | 0.6121992156  | -3.2877713084 |
|             |                            | H | 1.0 | -9.1225014984 | -1.5063059926 | -2.5595543475 |
|             |                            | O | 8.0 | 7.4932942479  | 0.4131751687  | -2.5834389841 |
|             |                            | H | 1.0 | 9.9705195066  | 2.7038323603  | -3.0264791499 |
|             |                            | H | 1.0 | 7.3102178164  | 2.4851764697  | -2.6946447748 |
|             |                            | C | 6.0 | 10.0064293358 | 1.8181838344  | -2.3736221148 |
|             |                            | H | 1.0 | 5.2107913303  | 3.0408579516  | -1.7477793160 |
|             |                            | H | 1.0 | -8.3088110604 | -3.0389729197 | -2.1009906453 |
|             |                            | C | 6.0 | -8.6666810642 | -2.0705142656 | -1.7468808384 |
|             |                            | H | 1.0 | -1.1234306254 | 1.8574386607  | -2.6658007005 |
|             |                            | H | 1.0 | 11.0069275017 | 1.7955649945  | -1.9345966820 |
|             |                            | H | 1.0 | 2.9477003574  | 2.3274077628  | -2.9488948317 |
|             |                            | C | 6.0 | 7.5316684188  | 1.7028552864  | -1.9471824485 |
|             |                            | H | 1.0 | -9.3835087028 | -2.2293040431 | -0.9381760171 |
|             |                            | H | 1.0 | 4.7714208628  | 3.0075235462  | 0.5570890158  |
|             |                            | H | 1.0 | -2.6836398601 | 1.2170442114  | -2.1151756301 |
|             |                            | O | 8.0 | -7.5583418289 | -1.2668036850 | -1.2929225536 |
|             |                            | C | 6.0 | 8.8992349938  | 1.9160314458  | -1.3139539008 |
|             |                            | C | 6.0 | 5.2216986052  | 2.0348331078  | -1.2992511682 |
|             |                            | C | 6.0 | -1.7944262333 | 1.7755848747  | -1.8063724866 |

|   |     |               |               |               |
|---|-----|---------------|---------------|---------------|
| H | 1.0 | 0.6930363233  | 3.9407639927  | -1.6885260207 |
| O | 8.0 | 3.0584766583  | 2.3792596795  | -0.2689471652 |
| H | 1.0 | 5.0730754704  | 1.2415452087  | -3.3011757848 |
| C | 6.0 | 4.4358610796  | 2.1085294608  | 0.0291126374  |
| C | 6.0 | 3.0971470462  | 1.3569559493  | -2.4633530431 |
| O | 8.0 | 6.5709791152  | 1.6934106606  | -0.9442895244 |
| H | 1.0 | 9.0242173723  | 1.1445552875  | -0.5469622057 |
| H | 1.0 | -2.0770420224 | 2.7837985731  | -1.5015693119 |
| O | 8.0 | 1.0929539363  | 1.8123041617  | -1.2907562030 |
| H | 1.0 | -0.8225704014 | 0.0255034061  | -1.0520235420 |
| C | 6.0 | 4.5935417352  | 1.0663013785  | -2.3258873248 |
| H | 1.0 | -5.3048517500 | -0.4315925252 | -0.8185970506 |
| H | 1.0 | 8.9235026818  | 2.8885692812  | -0.8129008810 |
| H | 1.0 | -0.0980921884 | 5.5134019879  | -1.4609335474 |
| C | 6.0 | 2.4165603186  | 1.4109239078  | -1.1031404699 |
| H | 1.0 | -7.5962495883 | 0.6271135741  | -0.5750313240 |
| H | 1.0 | 2.6366369690  | 0.5858647527  | -3.0873172628 |
| O | 8.0 | -3.3738628754 | -5.4018327992 | -0.2291039883 |
| H | 1.0 | -4.7061964556 | -3.3645149142 | -0.2790356482 |
| C | 6.0 | 0.3886964901  | 4.6767971548  | -0.9497510732 |
| H | 1.0 | -2.6350484143 | -6.8651640384 | -0.2984192079 |
| C | 6.0 | -1.0880087876 | 1.0212032268  | -0.6792281141 |
| C | 6.0 | -6.8135640749 | -1.8109287706 | -0.2870577717 |
| O | 8.0 | -1.9579082440 | -7.4989037097 | 0.0702392203  |
| O | 8.0 | -7.0461637990 | 1.2138792569  | -0.0351730474 |
| H | 1.0 | 1.3020377315  | 5.0586807308  | -0.4567512026 |
| C | 6.0 | -5.7047780251 | -0.8426050570 | 0.1173333492  |
| C | 6.0 | 0.2219316941  | 1.6571352200  | -0.1636793262 |
| C | 6.0 | 4.6234402630  | 0.9114657145  | 0.9659291946  |
| H | 1.0 | 5.6654270384  | 0.8608270761  | 1.2904065620  |
| H | 1.0 | 3.9898059454  | 1.0462135953  | 1.8475731514  |
| H | 1.0 | 2.4459466716  | 0.4269414989  | -0.6106623226 |
| C | 6.0 | -4.1987557796 | -2.8371511325 | 0.5168890759  |
| H | 1.0 | -4.5644511471 | 1.5090898029  | 0.3106571889  |
| N | 7.0 | -0.5590278605 | 4.0888767985  | 0.0031885195  |
| O | 8.0 | -7.0654046156 | -2.8910804893 | 0.1935491411  |
| O | 8.0 | 4.7540682371  | -0.2906606231 | -1.9479663584 |
| C | 6.0 | -2.8097689825 | -4.8669162513 | 0.7496636686  |
| H | 1.0 | 0.6733135183  | 0.9191588008  | 0.5137470510  |
| H | 1.0 | 5.7125332742  | -0.4473098776 | -1.9419791066 |
| O | 8.0 | -1.9511450599 | 0.7454966914  | 0.4368390874  |
| C | 6.0 | -4.5689065392 | -1.5255660781 | 0.8750837243  |
| C | 6.0 | -6.2939873598 | 0.4099507438  | 0.8687010471  |
| C | 6.0 | -1.3949617537 | -6.8668119113 | 1.1046465464  |

|  |  |   |     |               |               |              |
|--|--|---|-----|---------------|---------------|--------------|
|  |  | H | 1.0 | -8.6988007179 | -1.3060599725 | 1.4063180467 |
|  |  | H | 1.0 | 4.3801686875  | -0.0352002733 | 0.4820093012 |
|  |  | H | 1.0 | -1.3357590567 | 6.0015536518  | 0.3074271005 |
|  |  | C | 6.0 | 0.0051657106  | 2.9196541820  | 0.7158819076 |
|  |  | C | 6.0 | -3.1823653615 | -3.5008517814 | 1.1803524579 |
|  |  | H | 1.0 | -2.7907868109 | 2.6056953052  | 0.7631559392 |
|  |  | H | 1.0 | -0.1152233049 | -8.5471676841 | 1.5087256630 |
|  |  | C | 6.0 | -5.0891436812 | 1.2786118090  | 1.2410506344 |
|  |  | C | 6.0 | -1.7661082995 | -5.5668169634 | 1.4961380100 |
|  |  | H | 1.0 | -9.1086114401 | 0.4229662870  | 1.2941678088 |
|  |  | C | 6.0 | -1.0261745699 | 5.1407831432  | 0.9067744978 |
|  |  | C | 6.0 | -0.3840120198 | -7.5462414087 | 1.8292206802 |
|  |  | H | 1.0 | 0.9855961501  | 3.1808334961  | 1.1533390855 |
|  |  | C | 6.0 | -2.2163032548 | 1.8417756075  | 1.3085038368 |
|  |  | C | 6.0 | -8.5961347410 | -0.3339433542 | 1.8944271752 |
|  |  | H | 1.0 | -5.4505913394 | 2.2239980679  | 1.6571137308 |
|  |  | C | 6.0 | -3.8616406917 | -0.8506970956 | 1.8753872846 |
|  |  | C | 6.0 | -7.1331064921 | 0.0615007864  | 2.1303334936 |
|  |  | H | 1.0 | -1.8954389238 | 4.8211920753  | 1.4851484473 |
|  |  | H | 1.0 | -0.2487694057 | 5.4891318203  | 1.6138791703 |
|  |  | C | 6.0 | -0.9176285818 | 2.4304217922  | 1.8524925390 |
|  |  | C | 6.0 | -2.5236779515 | -2.8843956324 | 2.2735367093 |
|  |  | C | 6.0 | -4.1339946303 | 0.6095240455  | 2.2281496446 |
|  |  | C | 6.0 | -1.1251368620 | -4.9470990348 | 2.6129566140 |
|  |  | H | 1.0 | -6.6247477088 | -0.7254816194 | 2.6994501204 |
|  |  | H | 1.0 | -9.1170578752 | -0.4052026969 | 2.8540841062 |
|  |  | C | 6.0 | -2.8844283673 | -1.5609862990 | 2.6266105057 |
|  |  | H | 1.0 | -0.4162499922 | 1.6317808099  | 2.4082293812 |
|  |  | C | 6.0 | 0.2323541745  | -6.9509291033 | 2.9042528938 |
|  |  | O | 8.0 | -2.9312478501 | 1.3711113443  | 2.4173663767 |
|  |  | H | 1.0 | -7.1275420761 | 0.9567775544  | 2.7639508764 |
|  |  | C | 6.0 | -1.4997844244 | -3.5986262475 | 3.0229778745 |
|  |  | H | 1.0 | -1.1410699455 | 3.2181529809  | 2.5732420985 |
|  |  | C | 6.0 | -0.1244400552 | -5.6437030685 | 3.3185053433 |
|  |  | H | 1.0 | 1.0064304441  | -7.4641024746 | 3.4648709507 |
|  |  | H | 1.0 | -4.5747628023 | 0.6267517287  | 3.2319247642 |
|  |  | O | 8.0 | -0.9335377545 | -3.0568732982 | 4.0230222693 |
|  |  | O | 8.0 | -2.3355427241 | -0.9519823063 | 3.6800396622 |
|  |  | H | 1.0 | -1.6869895442 | -1.5918966901 | 4.0731596979 |
|  |  | O | 8.0 | 0.5210492877  | -5.1337470194 | 4.3752974680 |
|  |  | H | 1.0 | 0.1442360850  | -4.2281915552 | 4.5211614663 |

|                                           |            |               |               |               |               |               |
|-------------------------------------------|------------|---------------|---------------|---------------|---------------|---------------|
| N-(1-Cyano-2-methoxyethyl)<br>doxorubicin | NSC 639659 | H             | 1.0           | 1.8992085013  | -3.4299937713 | -7.0592418538 |
|                                           |            | O             | 8.0           | 1.7242968667  | -4.3228912438 | -6.7128703673 |
|                                           |            | H             | 1.0           | 0.1945471498  | -4.4996197113 | -5.3099133926 |
|                                           |            | C             | 6.0           | 1.2248424157  | -4.1260161431 | -5.4184704050 |
|                                           |            | O             | 8.0           | 1.5898292705  | -1.8266903381 | -5.8695597145 |
|                                           |            | C             | 6.0           | 1.2222935221  | -2.6549160945 | -5.0503569173 |
|                                           |            | H             | 1.0           | 1.8136531585  | -4.6731819570 | -4.6669892860 |
|                                           |            | H             | 1.0           | 0.0026083473  | -0.4748577378 | -4.6152334559 |
|                                           |            | H             | 1.0           | 2.5002407344  | -0.9428051637 | -3.4573756633 |
|                                           |            | C             | 6.0           | 0.7824196068  | -2.2426686391 | -3.6385668145 |
|                                           |            | H             | 1.0           | -1.2274733476 | -1.5312701433 | -3.9508117992 |
|                                           |            | C             | 6.0           | -0.2450283613 | -1.0959452638 | -3.7451498492 |
|                                           |            | H             | 1.0           | 2.7630985833  | -2.5654340852 | -2.7901596165 |
|                                           |            | C             | 6.0           | 2.0378726064  | -1.7512049646 | -2.8818237675 |
|                                           |            | O             | 8.0           | -2.2846620537 | 0.7091648966  | -3.5262410462 |
|                                           |            | H             | 1.0           | -2.9654781054 | 1.4119694387  | -3.3313680809 |
|                                           |            | O             | 8.0           | 0.2177898562  | -3.3958788939 | -3.0312484769 |
|                                           |            | C             | 6.0           | -0.3378725785 | -0.1904940551 | -2.5403886902 |
|                                           |            | C             | 6.0           | -1.4137779501 | 0.7457646937  | -2.5128497085 |
|                                           |            | C             | 6.0           | 1.6932736894  | -1.2455409617 | -1.4830125219 |
|                                           |            | H             | 1.0           | 0.3669655520  | -3.3334140770 | -2.0728995833 |
|                                           |            | H             | 1.0           | 2.5885103646  | -0.8315148712 | -1.0097628190 |
|                                           |            | C             | 6.0           | 0.5867915366  | -0.1991544470 | -1.5060448988 |
|                                           |            | O             | 8.0           | -3.5043729770 | 2.6075101151  | -2.3469723116 |
|                                           |            | C             | 6.0           | -1.5338389898 | 1.6628021235  | -1.4561091787 |
|                                           |            | O             | 8.0           | 1.2524611000  | -2.3975439345 | -0.7188068007 |
|                                           |            | C             | 6.0           | -2.6456210890 | 2.5986485312  | -1.4402117338 |
|                                           |            | C             | 6.0           | 0.4831920335  | 0.7470511813  | -0.4438506483 |
|                                           |            | C             | 6.0           | -0.5706854038 | 1.6764612694  | -0.4111258627 |
|                                           |            | H             | 1.0           | -4.5216380474 | 4.4005667746  | -1.1601376350 |
|                                           |            | H             | 1.0           | -0.5689118790 | -2.1807428496 | 1.1863859972  |
|                                           |            | O             | 8.0           | 1.4245286359  | 0.7375009401  | 0.5191756431  |
|                                           |            | H             | 1.0           | 0.0284251610  | -3.8472578152 | 1.1269989013  |
|                                           |            | C             | 6.0           | -2.7401539760 | 3.5731734280  | -0.3203441332 |
|                                           |            | C             | 6.0           | 1.5199151333  | -2.3960741035 | 0.6634428004  |
|                                           |            | C             | 6.0           | -3.8098270823 | 4.4690320357  | -0.3467871271 |
| C                                         | 6.0        | 0.2784275407  | -2.8251288078 | 1.4334908788  |               |               |
| H                                         | 1.0        | 1.8269144543  | -1.3872156935 | 0.9513525729  |               |               |
| H                                         | 1.0        | 1.1643990002  | 1.5004993235  | 1.1321879063  |               |               |
| C                                         | 6.0        | -0.6591939755 | 2.6280047926  | 0.7013990954  |               |               |
| C                                         | 6.0        | -1.7724656403 | 3.6036729063  | 0.7152677776  |               |               |
| O                                         | 8.0        | 2.5849066664  | -3.3037545773 | 0.8963907282  |               |               |
| N                                         | 7.0        | -2.3601373018 | -0.3664784646 | 2.2754845067  |               |               |
| O                                         | 8.0        | 0.2077810729  | 2.6040866831  | 1.6079746125  |               |               |



|                             |            |   |     |               |               |              |
|-----------------------------|------------|---|-----|---------------|---------------|--------------|
|                             |            | C | 6.0 | -3.9324058792 | 5.4200668657  | 0.6585671689 |
|                             |            | H | 1.0 | -4.7624268295 | 6.1198862782  | 0.6499653027 |
|                             |            | H | 1.0 | 1.1050385957  | -0.7862858428 | 2.8147900639 |
|                             |            | C | 6.0 | -1.5644243266 | -0.5675839216 | 3.0974399945 |
|                             |            | C | 6.0 | 0.5831527640  | -2.7902346084 | 2.9404590086 |
|                             |            | C | 6.0 | -1.9104862614 | 4.5957969338  | 1.7279201152 |
|                             |            | H | 1.0 | -0.2271527562 | -3.2724435926 | 3.4977694139 |
|                             |            | C | 6.0 | -2.9928929891 | 5.4891514117  | 1.6828583895 |
|                             |            | N | 7.0 | 0.7170868437  | -1.4245263006 | 3.5058354385 |
|                             |            | C | 6.0 | 3.0489430546  | -3.3029629873 | 2.2608033724 |
|                             |            | H | 1.0 | 3.3187103941  | -1.1279735943 | 2.5676309064 |
|                             |            | H | 1.0 | 1.6127519496  | -4.6575994950 | 3.0966016256 |
|                             |            | H | 1.0 | 4.7109739574  | -1.9798178687 | 1.8887504166 |
|                             |            | O | 8.0 | -0.9784204736 | 4.6463330938  | 2.7063444136 |
|                             |            | C | 6.0 | 1.8718838558  | -3.6010774520 | 3.2365996842 |
|                             |            | H | 1.0 | 3.7223729037  | -4.1647139195 | 2.3068373634 |
|                             |            | C | 6.0 | -0.4828483279 | -0.8238563606 | 4.0849332746 |
|                             |            | C | 6.0 | 3.8838170317  | -2.0634194814 | 2.5989632094 |
|                             |            | H | 1.0 | -3.1070634078 | 6.2404501934  | 2.4533533827 |
|                             |            | H | 1.0 | 0.2137211762  | 1.2311553985  | 4.0414991910 |
|                             |            | H | 1.0 | -0.9690554974 | 6.6912156536  | 3.1439668050 |
|                             |            | H | 1.0 | -0.8823555304 | -1.5075280984 | 4.8422549433 |
|                             |            | C | 6.0 | -1.0171673370 | 5.7170207893  | 3.6442098328 |
|                             |            | C | 6.0 | -0.1175688717 | 0.4931468616  | 4.7890749346 |
|                             |            | O | 8.0 | 2.2587712348  | -3.4408848859 | 4.5867451120 |
|                             |            | H | 1.0 | 4.2968784550  | -2.1690500035 | 3.6048379823 |
|                             |            | H | 1.0 | -0.1324860050 | 5.5881752960  | 4.2681416195 |
|                             |            | H | 1.0 | 2.0609673877  | -2.5075412179 | 4.7813368500 |
|                             |            | H | 1.0 | -1.9137534741 | 5.6735532859  | 4.2740022934 |
|                             |            | O | 8.0 | -1.2658692533 | 0.9417226465  | 5.4699077270 |
|                             |            | H | 1.0 | 0.7185447646  | 0.2960572471  | 5.4773671885 |
|                             |            | H | 1.0 | -0.9947951281 | 2.9692774546  | 5.0848159221 |
|                             |            | C | 6.0 | -1.1512059823 | 2.2773401837  | 5.9247725339 |
|                             |            | H | 1.0 | -2.0886622895 | 2.5239751685  | 6.4276497693 |
|                             |            | H | 1.0 | -0.3229919579 | 2.3950942304  | 6.6403893236 |
| Cyanomorpholino doxorubicin | 88254-07-3 | H | 1.0 | -3.8281566150 | 4.2835384587  | 4.8247096228 |
|                             |            | H | 1.0 | -5.3426700467 | 4.3295688437  | 3.8676906509 |
|                             |            | C | 6.0 | -4.2506037533 | 4.2490935991  | 3.8140808784 |
|                             |            | H | 1.0 | -3.8544532917 | 5.0788607328  | 3.2293917257 |
|                             |            | H | 1.0 | -5.2777775670 | 2.5809230063  | 5.3254844946 |
|                             |            | O | 8.0 | -3.8465973379 | 3.0719863182  | 3.1197750254 |
|                             |            | C | 6.0 | -4.9156446884 | 1.7081898643  | 4.7978937448 |
|                             |            | C | 6.0 | -4.1569241853 | 1.8636880492  | 3.6249788901 |

|   |     |               |               |               |
|---|-----|---------------|---------------|---------------|
| H | 1.0 | -5.7983970599 | 0.3489371694  | 6.1999459181  |
| C | 6.0 | -5.2091539067 | 0.4416707350  | 5.2927292333  |
| O | 8.0 | -2.6398582732 | 1.9027070366  | 1.1437001142  |
| C | 6.0 | -3.6857859128 | 0.7098242631  | 2.9344984724  |
| C | 6.0 | -2.8946017057 | 0.8029422443  | 1.6890613530  |
| H | 1.0 | -1.8197510566 | 1.4950289029  | -0.1013633695 |
| C | 6.0 | -4.7508751251 | -0.6974452979 | 4.6394533068  |
| C | 6.0 | -3.9941144068 | -0.5650586980 | 3.4747180458  |
| O | 8.0 | -1.3103706302 | 0.8159729208  | -0.6508440133 |
| H | 1.0 | -4.9606882306 | -1.6930240792 | 5.0106329193  |
| H | 1.0 | 5.8924515014  | -0.3274572045 | -0.9842794943 |
| C | 6.0 | -2.3905073065 | -0.4348420197 | 1.0846568998  |
| C | 6.0 | -1.5888913102 | -0.3596722999 | -0.0655775142 |
| C | 6.0 | -3.5105333216 | -1.8162805081 | 2.8313574203  |
| H | 1.0 | 5.5363061212  | -0.6597801520 | 0.7184002667  |
| O | 8.0 | 4.5985454231  | 1.9087158582  | -1.2675071566 |
| H | 1.0 | 4.5401340906  | 1.3773367166  | -2.0760347989 |
| H | 1.0 | -0.4772020351 | -0.5825342135 | -2.4687235305 |
| C | 6.0 | 5.1866341058  | -0.8133760848 | -0.3067918999 |
| C | 6.0 | -2.6835520295 | -1.7109409923 | 1.6387754283  |
| H | 1.0 | 1.8721321403  | -0.4916535390 | -3.1532619406 |
| H | 1.0 | 5.1753903003  | -1.8859672685 | -0.5151439758 |
| O | 8.0 | -3.8046384019 | -2.9261046537 | 3.3227417876  |
| C | 6.0 | -1.0498953277 | -1.5412847757 | -0.6477139456 |
| C | 6.0 | -0.1141823508 | -1.3932340710 | -1.8276760050 |
| C | 6.0 | -2.1756065237 | -2.8752228972 | 1.0384162934  |
| H | 1.0 | -0.9118141181 | -2.8733447831 | -3.1839969475 |
| C | 6.0 | 3.7204034445  | 1.2952194484  | -0.3217976965 |
| C | 6.0 | 2.0253474732  | -0.2113128433 | -2.1035826745 |
| C | 6.0 | 3.7917081562  | -0.2335864457 | -0.4685592355 |
| H | 1.0 | 2.2805746515  | 1.8454588101  | -2.6661999880 |
| H | 1.0 | 4.0706695568  | 1.5994943931  | 0.6698145563  |
| C | 6.0 | -1.3361066251 | -2.7870428754 | -0.1119197253 |
| H | 1.0 | 2.0360022592  | 5.8335035370  | -2.2365200462 |
| H | 1.0 | -3.0244519155 | -3.9610070143 | 2.3119193889  |
| O | 8.0 | 1.1687124009  | -1.0075310282 | -1.2664602484 |
| O | 8.0 | 3.3524939650  | -0.5722479725 | -1.8138463500 |
| C | 6.0 | 0.0193251659  | -2.6842210701 | -2.6398078054 |
| O | 8.0 | -2.4417439438 | -4.0964247709 | 1.5135311841  |
| O | 8.0 | 0.4550862175  | 5.3485278137  | -1.0645580209 |
| C | 6.0 | 1.7558706805  | 1.2840632963  | -1.8846635833 |
| N | 7.0 | 2.0153645217  | 3.1277462769  | -0.1256024906 |
| H | 1.0 | 0.8158813502  | -2.5700763474 | -3.3834515561 |
| H | 1.0 | -1.6623176177 | -4.5863870685 | -1.2072764782 |

|                                          |            |   |     |               |               |               |
|------------------------------------------|------------|---|-----|---------------|---------------|---------------|
|                                          |            | H | 1.0 | 3.1097792442  | -0.7002404788 | 0.2522014679  |
|                                          |            | C | 6.0 | 2.2445886632  | 1.7335623282  | -0.4876122458 |
|                                          |            | C | 6.0 | 0.7396672506  | 3.4774133810  | 0.4919074892  |
|                                          |            | C | 6.0 | 1.6043457140  | 4.9277574224  | -1.8002083189 |
|                                          |            | H | 1.0 | -1.0672600894 | 4.6378446613  | 0.0697231081  |
|                                          |            | C | 6.0 | -0.8273027165 | -4.0736180042 | -0.7134093866 |
|                                          |            | C | 6.0 | -0.1992815462 | 4.2472485497  | -0.4680087502 |
|                                          |            | H | 1.0 | 2.9896001184  | 4.9793596705  | -0.1686274349 |
|                                          |            | C | 6.0 | 2.6115848796  | 4.2342836341  | -0.8829458477 |
|                                          |            | H | 1.0 | 0.6865676798  | 1.4762574115  | -1.9945058644 |
|                                          |            | C | 6.0 | 0.3202048519  | -3.8945395748 | -1.7281387051 |
|                                          |            | H | 1.0 | 1.2936812939  | 4.2593200220  | -2.6206843686 |
|                                          |            | H | 1.0 | 0.2225776502  | 2.5606160064  | 0.7926227722  |
|                                          |            | H | 1.0 | 1.6824877764  | 1.1465475118  | 0.2475712626  |
|                                          |            | O | 8.0 | -0.5842273018 | -5.5912071184 | -3.1756806862 |
|                                          |            | H | 1.0 | -0.4881431077 | -4.7394991215 | 0.0855114147  |
|                                          |            | H | 1.0 | 1.7500440748  | -2.8020819745 | -0.9700291968 |
|                                          |            | H | 1.0 | -0.5489426067 | 3.5396343582  | -1.2376513165 |
|                                          |            | C | 6.0 | 0.4042461316  | -5.1441174514 | -2.6144369925 |
|                                          |            | O | 8.0 | 1.5741798046  | -3.7527135491 | -1.0754336868 |
|                                          |            | H | 1.0 | 3.4677200538  | 3.8570942268  | -1.4426204467 |
|                                          |            | C | 6.0 | 1.7497892937  | -5.8140405530 | -2.8139703402 |
|                                          |            | H | 1.0 | 0.7083450359  | -6.9542274502 | -3.9318857086 |
|                                          |            | H | 1.0 | 2.4674283385  | -5.0568432234 | -3.1644834961 |
|                                          |            | O | 8.0 | 1.6532267008  | -6.8890988197 | -3.7067007505 |
|                                          |            | H | 1.0 | 2.1186639548  | -6.1276378440 | -1.8245616383 |
|                                          |            | C | 6.0 | 0.9724745760  | 4.2673905407  | 1.7285636031  |
|                                          |            | N | 7.0 | 1.1495487552  | 4.8747741606  | 2.7018653047  |
|                                          |            | H | 1.0 | 5.8146283887  | 2.2219171277  | -0.2328913815 |
|                                          |            | H | 1.0 | 4.9089211062  | 3.0294388671  | 1.0426054788  |
|                                          |            | H | 1.0 | 4.3686097310  | 3.1542974577  | -0.6452952071 |
|                                          |            | C | 6.0 | 4.8046056857  | 2.4833349680  | 0.1062882112  |
|                                          |            | H | 1.0 | 4.9307269146  | 1.3477508706  | -1.9769413531 |
|                                          |            | O | 8.0 | 4.9126450275  | 0.1021559015  | -3.9063001400 |
|                                          |            | N | 7.0 | 4.4361874521  | 0.4839868226  | -1.7700525325 |
|                                          |            | C | 6.0 | 3.9600522021  | 1.2453748012  | 0.3086319894  |
|                                          |            | C | 6.0 | 4.3607323350  | -0.3243241854 | -2.8962858774 |
|                                          |            | H | 1.0 | 4.9082062713  | 0.5139503402  | 2.6019170382  |
|                                          |            | O | 8.0 | 4.2870413703  | 1.2521948006  | 2.6840561382  |
|                                          |            | H | 1.0 | 2.7357495978  | 3.1921084021  | 1.8516891517  |
|                                          |            | N | 7.0 | 3.8069767477  | 0.3178600419  | -0.5723155856 |
|                                          |            | C | 6.0 | 3.2797960402  | 1.0865603295  | 1.6711737607  |
|                                          |            | H | 1.0 | 3.2516161599  | -1.9076861550 | -0.7956704631 |
| Daunomycin 3,4-dichlorobenzoyl hydrazone | 66996-54-1 | H | 1.0 | 5.8146283887  | 2.2219171277  | -0.2328913815 |
|                                          |            | H | 1.0 | 4.9089211062  | 3.0294388671  | 1.0426054788  |
|                                          |            | H | 1.0 | 4.3686097310  | 3.1542974577  | -0.6452952071 |
|                                          |            | C | 6.0 | 4.8046056857  | 2.4833349680  | 0.1062882112  |
|                                          |            | H | 1.0 | 4.9307269146  | 1.3477508706  | -1.9769413531 |
|                                          |            | O | 8.0 | 4.9126450275  | 0.1021559015  | -3.9063001400 |
|                                          |            | N | 7.0 | 4.4361874521  | 0.4839868226  | -1.7700525325 |
|                                          |            | C | 6.0 | 3.9600522021  | 1.2453748012  | 0.3086319894  |
|                                          |            | C | 6.0 | 4.3607323350  | -0.3243241854 | -2.8962858774 |
|                                          |            | H | 1.0 | 4.9082062713  | 0.5139503402  | 2.6019170382  |
|                                          |            | O | 8.0 | 4.2870413703  | 1.2521948006  | 2.6840561382  |
|                                          |            | H | 1.0 | 2.7357495978  | 3.1921084021  | 1.8516891517  |
|                                          |            | N | 7.0 | 3.8069767477  | 0.3178600419  | -0.5723155856 |
|                                          |            | C | 6.0 | 3.2797960402  | 1.0865603295  | 1.6711737607  |
|                                          |            | H | 1.0 | 3.2516161599  | -1.9076861550 | -0.7956704631 |

|    |      |               |               |               |
|----|------|---------------|---------------|---------------|
| C  | 6.0  | 2.2682780976  | 2.2079809613  | 1.9401978034  |
| C  | 6.0  | 3.6602952027  | -1.6498484563 | -2.8997182959 |
| H  | 1.0  | 1.2071749848  | 2.6778269454  | 0.1042810196  |
| C  | 6.0  | 3.1675498413  | -2.3371962265 | -1.7822361613 |
| H  | 1.0  | 1.9764078187  | 2.0996041262  | 2.9898302257  |
| H  | 1.0  | 3.9292065796  | -1.7077174817 | -5.0271622380 |
| C  | 6.0  | 1.0109913266  | 2.1679321528  | 1.0540847322  |
| C  | 6.0  | 3.5352712695  | -2.2357385311 | -4.1677753669 |
| H  | 1.0  | 3.2018923878  | -1.0892258598 | 1.5811807584  |
| C  | 6.0  | 2.5618645977  | -0.2537052904 | 1.8765325705  |
| H  | 1.0  | 0.1312351625  | 4.0659713757  | 4.0062095325  |
| O  | 8.0  | 0.0080557617  | 3.0013570614  | 1.6625128793  |
| H  | 1.0  | -1.3242814772 | 6.0844301179  | 4.7653494718  |
| H  | 1.0  | 2.3999098021  | -0.3590831338 | 2.9568055680  |
| C  | 6.0  | 2.5553500242  | -3.5773932576 | -1.9392510467 |
| H  | 1.0  | -1.4477229794 | 5.2032995105  | 2.4728061652  |
| H  | 1.0  | 2.1602038540  | -4.1024485217 | -1.0780760726 |
| C  | 6.0  | 0.5416175009  | 0.7585966778  | 0.7191144433  |
| C  | 6.0  | 2.9225070462  | -3.4729711314 | -4.3268583279 |
| C  | 6.0  | 1.2471305266  | -0.3588426518 | 1.1406881629  |
| C  | 6.0  | -0.8492538420 | 3.6192230500  | 3.8098313688  |
| N  | 7.0  | -2.1770882443 | 5.7080866339  | 4.3574974341  |
| C  | 6.0  | 2.4253702542  | -4.1516765032 | -3.2043002656 |
| C  | 6.0  | -1.8595442036 | 4.6950563388  | 3.3540065359  |
| O  | 8.0  | -1.1617523876 | 1.7035880088  | -0.6249214387 |
| C  | 6.0  | -0.6965366744 | 2.4918765458  | 2.7821687616  |
| H  | 1.0  | -0.1666569469 | 1.6362643860  | 3.2170928824  |
| CL | 17.0 | 2.7906163727  | -4.1483452520 | -5.9342528650 |
| C  | 6.0  | -0.6084276925 | 0.6024891891  | -0.1146627959 |
| H  | 1.0  | -2.3528699664 | 3.4326114151  | 0.9967458866  |
| H  | 1.0  | -1.2040653258 | 3.1799794019  | 4.7504114356  |
| C  | 6.0  | 0.7468517693  | -1.6596787330 | 0.8549666065  |
| H  | 1.0  | -1.9370109602 | 1.3774983961  | -1.1744075531 |
| H  | 1.0  | -2.6968432046 | 5.2566198321  | 5.1081969830  |
| CL | 17.0 | 1.6425914174  | -5.7043132080 | -3.3508674142 |
| O  | 8.0  | 1.4438294389  | -2.7097596342 | 1.3194560330  |
| O  | 8.0  | -1.9613532836 | 1.9644801485  | 2.4101147689  |
| C  | 6.0  | -3.1622452485 | 3.9993883986  | 2.9194736122  |
| C  | 6.0  | -1.1101138390 | -0.6810453162 | -0.4007107369 |
| C  | 6.0  | -2.8593241435 | 2.9516364976  | 1.8403553452  |
| H  | 1.0  | -3.8566878461 | 4.7540762859  | 2.5352823183  |
| C  | 6.0  | -0.4273293790 | -1.8212096166 | 0.1046150217  |
| H  | 1.0  | 0.9183637540  | -3.5180835685 | 1.0499587427  |
| O  | 8.0  | -2.8636548238 | 0.2050577246  | -1.6937439277 |

|                                    |            |                                                                                                                                                                                                                                                                                                                                                                                                                                                                                                                                                                                                                                                                                                                                                                                                                                                                                                                                                                                                                                                                                                                                                                                                      |
|------------------------------------|------------|------------------------------------------------------------------------------------------------------------------------------------------------------------------------------------------------------------------------------------------------------------------------------------------------------------------------------------------------------------------------------------------------------------------------------------------------------------------------------------------------------------------------------------------------------------------------------------------------------------------------------------------------------------------------------------------------------------------------------------------------------------------------------------------------------------------------------------------------------------------------------------------------------------------------------------------------------------------------------------------------------------------------------------------------------------------------------------------------------------------------------------------------------------------------------------------------------|
|                                    |            | C 6.0 -2.3086855122 -0.8172679373 -1.2331049319<br>O 8.0 -3.8099189595 3.3954609338 4.0443114190<br>H 1.0 -3.3941020248 2.5264443740 4.1510947695<br>C 6.0 -0.9178768225 -3.1590348566 -0.1770412467<br>H 1.0 -3.8104130712 1.4659754018 0.5938782224<br>C 6.0 -4.0883315987 2.2049593943 1.3479543215<br>H 1.0 -4.7927971292 2.9099064670 0.8952729058<br>O 8.0 -0.3198513567 -4.1745958871 0.2477254570<br>C 6.0 -2.8341959648 -2.1783365058 -1.5017952919<br>C 6.0 -2.1502361886 -3.3098311458 -0.9906415285<br>H 1.0 -4.5976634967 1.7023183034 2.1740095484<br>O 8.0 -4.6653111985 -1.3269368363 -2.7556722248<br>C 6.0 -4.0109517750 -2.4019087832 -2.2724017082<br>C 6.0 -2.6028216537 -4.6087057142 -1.2318018357<br>H 1.0 -6.1762137214 -0.5118939078 -3.7981113911<br>H 1.0 -2.0396920293 -5.4379654356 -0.8219960885<br>H 1.0 -5.6385854230 -2.0848686854 -4.4450276399<br>C 6.0 -5.8434250758 -1.5148260275 -3.5310060053<br>C 6.0 -4.4516460855 -3.7160787998 -2.5025358936<br>C 6.0 -3.7523175041 -4.8035351420 -1.9876741674<br>H 1.0 -5.3449816549 -3.8909275131 -3.0879293116<br>H 1.0 -6.6303200074 -2.0169546509 -2.9555321989<br>H 1.0 -4.1132434914 -5.8088204480 -2.1824724819 |
| Daunomycin 4-nitrobenzoylhydrazone | 66996-56-3 | H 1.0 5.4908286068 2.2622406386 -0.6868782380<br>H 1.0 3.9813489074 3.1806136401 -0.7923204181<br>H 1.0 4.7636028729 2.9221820912 0.7800266940<br>C 6.0 4.5387574635 2.4591671108 -0.1804213267<br>H 1.0 4.4088978016 1.4043847682 -2.4177132744<br>O 8.0 4.1253905193 -0.0098413429 -4.3157981476<br>H 1.0 2.6488307502 3.0012929988 1.8091875565<br>N 7.0 4.1229575932 0.4757272670 -2.1168219687<br>H 1.0 -4.9036458963 2.7785607982 1.0535205130<br>H 1.0 -2.4648579651 3.2995933220 1.1523968717<br>C 6.0 3.9306866569 -0.4027431643 -3.1733183509<br>H 1.0 1.0519133120 2.6533221419 0.0849054221<br>H 1.0 -3.9266642643 1.3738335413 0.5916926071<br>C 6.0 3.7641761670 1.1786514243 0.0245285419<br>H 1.0 -3.9362810897 4.4515734988 2.8526320268<br>N 7.0 3.6000849214 0.2705789381 -0.8696118311<br>H 1.0 -1.5326251888 4.9216042977 2.7674309730<br>C 6.0 -4.1888675679 2.0349744334 1.4200374655<br>C 6.0 2.1796617710 2.0139948581 1.8260768060<br>C 6.0 -2.9502343377 2.7345359403 1.9552518457                                                                                                                                                                                        |

|   |     |               |               |               |
|---|-----|---------------|---------------|---------------|
| H | 1.0 | 2.5444986218  | -1.9629940894 | -4.7786563316 |
| O | 8.0 | -0.0934882309 | 2.8194316931  | 1.7060087076  |
| C | 6.0 | 0.8900357489  | 2.0532840383  | 0.9875429038  |
| O | 8.0 | 4.2385724120  | 1.0066883699  | 2.3698169077  |
| C | 6.0 | 3.5215588863  | -1.8129944013 | -2.8773565757 |
| C | 6.0 | 3.1705883500  | 0.9193660624  | 1.4137862908  |
| C | 6.0 | -3.2279318119 | 3.6673989896  | 3.1404854602  |
| H | 1.0 | 1.9283542559  | 1.8100116467  | 2.8718240254  |
| C | 6.0 | 2.7900308325  | -2.4906574487 | -3.8635133744 |
| H | 1.0 | 4.8274280490  | 0.2529008316  | 2.2188284753  |
| N | 7.0 | -2.2120244260 | 5.2351755318  | 4.7108041375  |
| C | 6.0 | -1.9169908481 | 4.3261012207  | 3.6054602015  |
| H | 1.0 | -4.6792894927 | 1.4526527254  | 2.2041878657  |
| O | 8.0 | -1.3124888732 | 1.7564752112  | -0.6797855817 |
| H | 1.0 | 4.4798374856  | -2.0143528037 | -0.9410359993 |
| H | 1.0 | -1.3498389557 | 5.5789816371  | 5.1278177328  |
| H | 1.0 | -2.7045992291 | 4.7082109697  | 5.4299614427  |
| H | 1.0 | -2.0957607123 | 1.4874000571  | -1.2488267343 |
| O | 8.0 | -2.0352799339 | 1.7004868624  | 2.4030680883  |
| C | 6.0 | 3.8906321923  | -2.4869559892 | -1.7109140067 |
| C | 6.0 | -0.7617222404 | 2.1975667733  | 2.7903020867  |
| C | 6.0 | 0.4124094867  | 0.6803124257  | 0.5318560973  |
| O | 8.0 | -3.8403484489 | 2.9501282116  | 4.2173773138  |
| C | 6.0 | 2.3843774476  | -3.8100088916 | -3.6650371005 |
| C | 6.0 | -0.7506494089 | 0.6087987548  | -0.2954590972 |
| C | 6.0 | -0.8898283007 | 3.2189908313  | 3.9268722782  |
| H | 1.0 | 0.0939300194  | 3.6520364245  | 4.1368412071  |
| H | 1.0 | 1.8038823686  | -4.3195278727 | -4.4269776278 |
| C | 6.0 | 2.4525068266  | -0.4322663099 | 1.5485084817  |
| H | 1.0 | -3.4204783866 | 2.0764609532  | 4.2229211255  |
| O | 8.0 | 3.4154375038  | -5.6279351188 | -0.1155975180 |
| C | 6.0 | 3.4798118567  | -3.8028931173 | -1.5380858899 |
| H | 1.0 | -0.2153528085 | 1.3068483393  | 3.1217935319  |
| H | 1.0 | 3.0767528044  | -1.2532693194 | 1.1877016172  |
| C | 6.0 | 1.1246165353  | -0.4723627081 | 0.8285191556  |
| O | 8.0 | -3.0257008008 | 0.3763826735  | -1.8781403250 |
| C | 6.0 | 2.7192473740  | -4.4797621906 | -2.4890936251 |
| H | 1.0 | 2.3082632549  | -0.6042818720 | 2.6228820898  |
| H | 1.0 | -1.2146830623 | 2.6883033346  | 4.8303046505  |
| N | 7.0 | 3.8546706367  | -4.4928316625 | -0.2928991429 |
| C | 6.0 | -1.2526934416 | -0.6384074531 | -0.7110476464 |
| C | 6.0 | -2.4625913102 | -0.6874140237 | -1.5347633291 |
| H | 1.0 | 2.4081123922  | -5.4987359323 | -2.2976638605 |
| H | 1.0 | -6.3854750621 | -0.1231680249 | -3.9722588851 |

|                    |            |                                                                                                                                                                                                                                                                                                                                                                                                                                                                                                                                                                                                                                                                                                                                                                                                                                                                                                                                                                                                                                                                                                                                                                                                   |
|--------------------|------------|---------------------------------------------------------------------------------------------------------------------------------------------------------------------------------------------------------------------------------------------------------------------------------------------------------------------------------------------------------------------------------------------------------------------------------------------------------------------------------------------------------------------------------------------------------------------------------------------------------------------------------------------------------------------------------------------------------------------------------------------------------------------------------------------------------------------------------------------------------------------------------------------------------------------------------------------------------------------------------------------------------------------------------------------------------------------------------------------------------------------------------------------------------------------------------------------------|
|                    |            | C 6.0 0.6214615495 -1.7401291305 0.4156432358<br>O 8.0 4.5860496532 -3.8949191514 0.4965968375<br>C 6.0 -0.5621976581 -1.8240823850 -0.3342002288<br>O 8.0 -4.8470239441 -1.0384314464 -3.0620359197<br>H 1.0 -5.8698726175 -1.6214026261 -4.7912682070<br>C 6.0 -6.0468887901 -1.1477033885 -3.8181810764<br>O 8.0 1.3145124202 -2.8299090088 0.7718212900<br>C 6.0 -2.9934306170 -2.0137660261 -1.9367145213<br>C 6.0 -4.1856491557 -2.1576337973 -2.7032958513<br>C 6.0 -1.0520630512 -3.1251542840 -0.7541497802<br>H 1.0 0.8076652373 -3.6091322807 0.4031801263<br>H 1.0 -6.8179880420 -1.7068256235 -3.2747405705<br>C 6.0 -2.3017617602 -3.1904745612 -1.5568467702<br>O 8.0 -0.4476056563 -4.1794946445 -0.4566917316<br>C 6.0 -4.6337637906 -3.4410016898 -3.0572405007<br>H 1.0 -5.5391446909 -3.5556397278 -3.6391277417<br>C 6.0 -2.7628236344 -4.4582410366 -1.9189321221<br>C 6.0 -3.9272579147 -4.5754360620 -2.6674312937<br>H 1.0 -2.1958419244 -5.3247420842 -1.6014732725<br>H 1.0 -4.2960386362 -5.5559151892 -2.9533569756                                                                                                                                                  |
| Daunomycin 3-oxime | 34610-60-1 | H 1.0 -7.5411482061 2.1703858771 -3.6790894865<br>H 1.0 -6.7927443540 3.5463663287 -2.8254463611<br>C 6.0 -7.1169085661 2.5104413258 -2.7268283743<br>H 1.0 -8.1456486318 0.2703356866 -2.5743821244<br>O 8.0 -5.9452002998 1.7794446571 -2.3844213313<br>C 6.0 -7.2362726599 -0.2574158683 -2.3180471139<br>C 6.0 -6.0272307543 0.4470249049 -2.1945074307<br>H 1.0 -8.2300782399 -2.1542650912 -2.2150861193<br>C 6.0 -7.2827172199 -1.6334098648 -2.1142999509<br>O 8.0 -3.4040335573 1.6628374613 -1.8712805027<br>H 1.0 -7.8798942041 2.4419310708 -1.9422027207<br>C 6.0 -4.8341533300 -0.2545797116 -1.8576307034<br>H 1.0 2.6827539568 -1.0160524961 -1.8511841879<br>H 1.0 -1.8626184754 1.9163847423 -1.6137381464<br>C 6.0 -3.5268104244 0.4296031342 -1.7098881053<br>C 6.0 -6.1306571153 -2.3377056986 -1.7856147465<br>H 1.0 1.4401479257 1.0095573101 -1.4748106053<br>C 6.0 -4.9190719776 -1.6553467938 -1.6592855618<br>O 8.0 -0.9463450204 1.5729610317 -1.3819104113<br>H 1.0 -6.1409785616 -3.4083973585 -1.6229919129<br>C 6.0 -2.3508010076 -0.3770274328 -1.3626634742<br>C 6.0 -1.1040811858 0.2532033250 -1.2167592444<br>H 1.0 1.4186613900 -3.3389364986 -1.2319814331 |

|   |     |               |               |               |
|---|-----|---------------|---------------|---------------|
| C | 6.0 | -3.7187765014 | -2.4619844603 | -1.3095026810 |
| C | 6.0 | -2.4400607956 | -1.7842143521 | -1.1686170148 |
| O | 8.0 | -3.8248137515 | -3.6959381639 | -1.1441701550 |
| C | 6.0 | 0.0527332689  | -0.5124556001 | -0.8910941708 |
| C | 6.0 | 1.3616139727  | 0.2260437815  | -0.7148815927 |
| C | 6.0 | -1.2943154202 | -2.5283273273 | -0.8382202882 |
| C | 6.0 | 2.5790984314  | -0.6991385781 | -0.8079236035 |
| C | 6.0 | -0.0329198944 | -1.8800352093 | -0.6910026131 |
| H | 1.0 | -2.2821381864 | -4.1228298249 | -0.7860439859 |
| O | 8.0 | -1.3311385442 | -3.8522494684 | -0.6522308049 |
| H | 1.0 | 3.4754753571  | -0.1340109465 | -0.5428923556 |
| C | 6.0 | 1.1689194493  | -2.7306933665 | -0.3517460479 |
| H | 1.0 | 3.9018923884  | -3.1127514158 | -2.0918651550 |
| H | 1.0 | 1.2949819865  | 2.7464347712  | -0.2344984952 |
| C | 6.0 | 3.6249601516  | -2.8890921885 | 0.0481494093  |
| H | 1.0 | 5.5454476698  | 1.4892533024  | 0.3642540645  |
| C | 6.0 | 2.4204984339  | -1.9358217213 | 0.0938126705  |
| H | 1.0 | 5.2301217089  | -3.7126680222 | -1.0776477719 |
| H | 1.0 | 0.9114971659  | -3.4499867950 | 0.4304679520  |
| C | 6.0 | 4.4914302182  | -2.9176564877 | -1.1866166228 |
| O | 8.0 | 1.2826342271  | 0.8679438187  | 0.5866994213  |
| O | 8.0 | 3.1027350926  | 2.3670905623  | 0.5345738056  |
| C | 6.0 | 1.6962077387  | 2.2295636041  | 0.6436297523  |
| N | 7.0 | 3.9291799602  | -3.7664594004 | 0.9386033267  |
| H | 1.0 | 5.6080875229  | 3.0449499775  | 1.2202796667  |
| C | 6.0 | 5.3288553952  | 1.9924631452  | 1.3102772236  |
| H | 1.0 | 5.0180572578  | -1.9692273233 | -1.3426787876 |
| H | 1.0 | 1.7478934661  | -0.6843186572 | 1.4837251524  |
| C | 6.0 | 3.8573261606  | 1.8508969288  | 1.6647305396  |
| H | 1.0 | 3.6098463857  | 0.7911169964  | 1.8039139392  |
| O | 8.0 | 2.2810555647  | -1.4997846682 | 1.4618743433  |
| H | 1.0 | 5.9454421354  | 1.5404066109  | 2.0927382815  |
| C | 6.0 | 1.1475483598  | 2.8370690449  | 1.9364353410  |
| H | 1.0 | 1.2005186775  | 3.9279262318  | 1.8379229245  |
| H | 1.0 | 3.5625533116  | 4.2446346551  | 1.8582542124  |
| H | 1.0 | 0.0903303319  | 2.5710455595  | 2.0311969137  |
| O | 8.0 | 3.1725003153  | -3.8576282503 | 2.0949170603  |
| H | 1.0 | 2.6480420273  | -3.0336624487 | 2.1859919272  |
| C | 6.0 | 3.4446988215  | 2.6274153693  | 2.9206945479  |
| O | 8.0 | 3.7467512619  | 4.0181221140  | 2.7823237717  |
| C | 6.0 | 1.9439639529  | 2.4208510142  | 3.1922286531  |
| H | 1.0 | 1.7874563927  | 1.3488245698  | 3.3726217244  |
| H | 1.0 | 4.0134829396  | 2.2747474386  | 3.7873405344  |
| H | 1.0 | 1.8642199553  | 4.1082955612  | 4.3082558775  |



|                           |                            |               |               |               |               |               |
|---------------------------|----------------------------|---------------|---------------|---------------|---------------|---------------|
|                           |                            | N             | 7.0           | 1.5830078005  | 3.1351463838  | 4.4129205445  |
|                           |                            | H             | 1.0           | 0.5752029255  | 3.1229232028  | 4.5504577328  |
| Daunorubicin / Daunomycin | 20830-81-3 /<br>23541-50-6 | H             | 1.0           | -0.9428939383 | 6.5012132365  | 2.3004151205  |
|                           |                            | O             | 8.0           | -0.1569866796 | 4.8214284458  | 0.5952610197  |
|                           |                            | H             | 1.0           | -2.6426611920 | 6.1179461781  | 1.8793821135  |
|                           |                            | C             | 6.0           | -1.6844629576 | 5.7070506936  | 2.2113024881  |
|                           |                            | H             | 1.0           | -1.3499749952 | 3.5839659295  | -1.0115572443 |
|                           |                            | C             | 6.0           | -1.1948801366 | 4.6764075451  | 1.2121102538  |
|                           |                            | H             | 1.0           | -1.8538619870 | 5.2577731654  | 3.1972041399  |
|                           |                            | H             | 1.0           | -3.0585077224 | 3.1180265680  | -0.8556407486 |
|                           |                            | C             | 6.0           | -2.0538688767 | 2.9585878840  | -0.4572730316 |
|                           |                            | C             | 6.0           | -2.0546478169 | 3.3985273561  | 1.0267985435  |
|                           |                            | O             | 8.0           | 2.9265282829  | -0.7313891178 | -1.7378416030 |
|                           |                            | H             | 1.0           | -1.5366962029 | 1.3232688075  | -1.7674363754 |
|                           |                            | H             | 1.0           | 1.4539497611  | -0.2663608955 | -2.1268736819 |
|                           |                            | O             | 8.0           | -3.4121341594 | 3.6521929157  | 1.3967334502  |
|                           |                            | C             | 6.0           | 3.0389115401  | -0.3704647131 | -0.5472637682 |
|                           |                            | C             | 6.0           | -1.6534627186 | 1.4992241575  | -0.6969222479 |
|                           |                            | O             | 8.0           | 0.5853498919  | 0.1689042718  | -1.8787812323 |
|                           |                            | C             | 6.0           | 0.7320700653  | 0.5431018034  | -0.6017945903 |
|                           |                            | C             | 6.0           | 1.9217930411  | 0.3096985457  | 0.1179192812  |
|                           |                            | C             | 6.0           | -0.3577976361 | 1.1961767979  | 0.0332414217  |
|                           |                            | H             | 1.0           | 7.3337348546  | -1.6953317404 | -2.2393643320 |
|                           |                            | O             | 8.0           | 3.3359581177  | 0.8796622085  | 3.4237399784  |
|                           |                            | C             | 6.0           | 2.0123650536  | 0.7370178711  | 1.4732458562  |
|                           |                            | H             | 1.0           | -3.4817055048 | 3.6155780232  | 2.3601326723  |
|                           |                            | C             | 6.0           | -0.2631306207 | 1.6146013074  | 1.3502647707  |
|                           |                            | C             | 6.0           | 3.2292841806  | 0.5110600128  | 2.2328506655  |
|                           |                            | C             | 6.0           | 0.9256179518  | 1.3880300676  | 2.0892083207  |
|                           |                            | C             | 6.0           | 4.2845414854  | -0.6104214882 | 0.2246772041  |
|                           |                            | H             | 1.0           | -1.1893182230 | 2.7206435670  | 2.9380887365  |
|                           |                            | C             | 6.0           | -1.4514380555 | 2.3043212240  | 1.9613936924  |
|                           |                            | H             | 1.0           | 1.8825962314  | 1.5630869549  | 3.6928562962  |
|                           |                            | C             | 6.0           | 4.3694450654  | -0.1768645365 | 1.5701545735  |
|                           |                            | O             | 8.0           | 0.9718472159  | 1.8045318550  | 3.3617822615  |
| O                         | 8.0                        | 5.3354694104  | -1.6823161066 | -1.6196976213 |               |               |
| C                         | 6.0                        | 5.4164843309  | -1.2662134732 | -0.3387702689 |               |               |
| H                         | 1.0                        | 6.1383011435  | -2.5721063500 | -3.2309565305 |               |               |
| C                         | 6.0                        | 6.4477390656  | -2.3411699224 | -2.2115670487 |               |               |
| C                         | 6.0                        | 5.5230564647  | -0.3786152867 | 2.3313739094  |               |               |
| H                         | 1.0                        | 5.5344074936  | -0.0265435183 | 3.3554852054  |               |               |
| C                         | 6.0                        | 6.5675718351  | -1.4602820387 | 0.4421908021  |               |               |
| O                         | 8.0                        | -2.7245189029 | 0.6669660535  | -0.2020483377 |               |               |

|                                     |            |                                                                                                                                                                                                                                                                                                                                                                                                                                                                                                                                                                                                                                                                                                                                                                                                                                                                                                                                                                                                                                                                                                                                                                                                                                                                                                                                                               |
|-------------------------------------|------------|---------------------------------------------------------------------------------------------------------------------------------------------------------------------------------------------------------------------------------------------------------------------------------------------------------------------------------------------------------------------------------------------------------------------------------------------------------------------------------------------------------------------------------------------------------------------------------------------------------------------------------------------------------------------------------------------------------------------------------------------------------------------------------------------------------------------------------------------------------------------------------------------------------------------------------------------------------------------------------------------------------------------------------------------------------------------------------------------------------------------------------------------------------------------------------------------------------------------------------------------------------------------------------------------------------------------------------------------------------------|
|                                     |            | C 6.0 6.6160892357 -1.0191315972 1.7617212862<br>H 1.0 7.4305753651 -1.9573202656 0.0185905190<br>H 1.0 -2.2512744978 1.5694997997 2.1038811205<br>H 1.0 7.5187025341 -1.1804166782 2.3434797279<br>O 8.0 -3.1400942953 -0.4992771678 -2.1113627051<br>H 1.0 6.6925875627 -3.2728288712 -1.6870992598<br>H 1.0 -3.6520970328 -1.4378116493 -3.7970475721<br>C 6.0 -2.7569555585 -0.6255060481 -0.7411388519<br>H 1.0 -1.1949791072 -1.6122480372 -3.5569964932<br>H 1.0 -1.7700335543 -1.1032033133 -0.6767740303<br>C 6.0 -3.2184998668 -1.7356195813 -2.8319820225<br>H 1.0 -4.7345960795 -0.8613374405 0.0087324197<br>C 6.0 -1.8509307710 -2.3648416286 -3.1114133210<br>C 6.0 -3.7992518063 -1.4315568069 0.0227472304<br>H 1.0 -5.2276438606 -2.1387298845 -2.2205630286<br>H 1.0 -3.4922098392 -1.5406005623 1.0692718167<br>H 1.0 -1.3900212679 -2.7584380043 -2.2053629462<br>C 6.0 -4.2543647812 -2.6451531955 -2.1250228038<br>H 1.0 -1.9601842139 -3.1953000428 -3.8157764813<br>C 6.0 -4.0053890870 -2.8144722218 -0.6167516169<br>H 1.0 -4.5056203629 -3.8671870301 -3.6343753302<br>O 8.0 -4.3207758789 -3.9537072160 -2.6902646572<br>H 1.0 -4.9259424569 -3.2587432608 -0.1997720886<br>N 7.0 -2.8260442148 -3.6584052807 -0.3850942741<br>H 1.0 -2.7904193222 -3.9307192289 0.5943332553<br>H 1.0 -2.9287040707 -4.5117190620 -0.9293632225 |
| 4-Demethoxyadriamycin / Medorubicin | 64363-63-9 | H 1.0 2.3679665419 4.1239917310 -7.3585782794<br>H 1.0 0.8830197837 2.1746833423 -6.8678341138<br>C 6.0 2.3519709802 3.6849771179 -6.3657238228<br>C 6.0 1.5216697972 2.5995617858 -6.1014642279<br>O 8.0 -0.1090304691 0.4079846825 -5.4683611314<br>H 1.0 3.8128922790 5.0569430343 -5.5655379389<br>C 6.0 3.1659996258 4.2106759198 -5.3554445670<br>H 1.0 -0.8682524114 -0.8259705162 -4.6991467710<br>C 6.0 1.4974633245 2.0295022332 -4.8231024347<br>C 6.0 0.6100429997 0.8712480400 -4.5581559214<br>O 8.0 -1.0104287374 -1.3547971829 -3.8649239952<br>C 6.0 3.1488516267 3.6513658007 -4.0809426875<br>C 6.0 2.3170339651 2.5598305304 -3.8049793370<br>C 6.0 0.6058809602 0.2970587868 -3.2148657970<br>H 1.0 3.7700601857 4.0410274136 -3.2822106701<br>C 6.0 -0.2195008359 -0.8037095695 -2.9380271399<br>C 6.0 2.3085756633 1.9750383646 -2.4425753468                                                                                                                                                                                                                                                                                                                                                                                                                                                                                          |

|   |     |               |               |               |
|---|-----|---------------|---------------|---------------|
| H | 1.0 | -2.1107142977 | -2.3915927760 | -1.8681130071 |
| C | 6.0 | 1.4342449989  | 0.8369660949  | -2.1858430857 |
| H | 1.0 | -0.7077150386 | -3.4389815759 | -1.9530238056 |
| C | 6.0 | -0.2414097171 | -1.3841154057 | -1.6323796222 |
| C | 6.0 | -1.1329071034 | -2.5819707869 | -1.4156884148 |
| O | 8.0 | 3.0370882168  | 2.4547610341  | -1.5467118019 |
| C | 6.0 | 1.4071478912  | 0.2619951322  | -0.9051426382 |
| O | 8.0 | -1.1922075731 | -5.3168614830 | -0.4392495048 |
| C | 6.0 | 0.5644147948  | -0.8553992611 | -0.6374350082 |
| C | 6.0 | -1.3387150600 | -2.9677139811 | 0.0632825727  |
| C | 6.0 | -1.7994122991 | -4.4288605521 | 0.1394261883  |
| O | 8.0 | -2.3466807726 | -2.1742023622 | 0.6733851080  |
| O | 8.0 | 2.1682592489  | 0.7237724517  | 0.0942814136  |
| H | 1.0 | 2.6853189451  | 1.4928123761  | -0.2828533864 |
| H | 1.0 | -1.9128216065 | -1.4120683882 | 1.0954884776  |
| H | 1.0 | 0.7277793176  | -3.5333895090 | 0.3577076152  |
| C | 6.0 | 0.5469723800  | -1.4183819006 | 0.7671429344  |
| C | 6.0 | 0.0049469754  | -2.8503217186 | 0.8157278523  |
| H | 1.0 | -3.8725664662 | -4.2101321315 | 0.5707990592  |
| H | 1.0 | 1.5657215078  | -1.3904815460 | 1.1691002593  |
| C | 6.0 | -3.0166890516 | -4.7726771883 | 0.9757424675  |
| O | 8.0 | -0.2886751687 | -0.5259882809 | 1.5455953350  |
| H | 1.0 | -2.5686180798 | -6.5349014683 | 0.4044921656  |
| H | 1.0 | -2.8641857142 | -4.3772763562 | 1.9915028578  |
| H | 1.0 | -0.1234437788 | -3.1624871177 | 1.8577806163  |
| H | 1.0 | -1.8865101774 | 1.2258573424  | 2.2412075381  |
| O | 8.0 | -3.2507666388 | -6.1539143911 | 0.9853707946  |
| H | 1.0 | 0.4327043600  | 2.1921433236  | 2.0748050313  |
| H | 1.0 | -3.7807891386 | 0.3364128040  | 3.6174879940  |
| C | 6.0 | -0.0230317293 | -0.4822024649 | 2.9603922983  |
| C | 6.0 | -1.7863247757 | 1.1063045114  | 3.3273271980  |
| H | 1.0 | 0.2677143257  | -1.4827610684 | 3.3039775380  |
| H | 1.0 | 1.9426231855  | 0.3899429073  | 2.6687631761  |
| O | 8.0 | -1.2424071912 | -0.2120284745 | 3.6031912525  |
| H | 1.0 | -3.6506247187 | 2.1034736199  | 3.7434122866  |
| C | 6.0 | 0.5734968971  | 1.9923792651  | 3.1438617141  |
| C | 6.0 | -3.1569572125 | 1.1564350875  | 3.9817053021  |
| H | 1.0 | -1.1892708432 | 3.1578381930  | 3.6566934786  |
| C | 6.0 | 1.0620616501  | 0.5433764549  | 3.2961657872  |
| C | 6.0 | -0.7940247397 | 2.1522436171  | 3.8493952943  |
| H | 1.0 | 1.3820507901  | 3.8545453976  | 3.3682848521  |
| N | 7.0 | 1.6071757807  | 2.8999116772  | 3.6427663598  |
| H | 1.0 | -3.0715779987 | 1.0809429523  | 5.0682581201  |
| H | 1.0 | 1.3727332020  | 0.3739159663  | 4.3351552862  |

|                          |            |               |               |               |               |               |
|--------------------------|------------|---------------|---------------|---------------|---------------|---------------|
|                          |            | H             | 1.0           | 1.5588008470  | 2.8883158536  | 4.6616681479  |
|                          |            | O             | 8.0           | -0.6432836505 | 2.0540748617  | 5.2669312249  |
|                          |            | H             | 1.0           | -0.6372974996 | 1.1078878801  | 5.4757079530  |
| N,N-dibenzyldaunorubicin | 70878-51-2 | H             | 1.0           | 6.0613902494  | -0.3502483281 | -7.3524045694 |
|                          |            | H             | 1.0           | 5.2509529449  | 2.2494894797  | -1.2064298550 |
|                          |            | C             | 6.0           | 5.1082321459  | -0.4184108915 | -6.8359735784 |
|                          |            | H             | 1.0           | 4.9314161324  | 1.7115842223  | -6.5425344841 |
|                          |            | H             | 1.0           | 4.9971143134  | -2.5657013016 | -6.9812175631 |
|                          |            | C             | 6.0           | 4.4733932393  | 0.7402613128  | -6.3773523466 |
|                          |            | C             | 6.0           | 4.5961581147  | 1.4346058863  | -0.9093421241 |
|                          |            | C             | 6.0           | 4.5107454609  | -1.6605277290 | -6.6286691152 |
|                          |            | H             | 1.0           | 5.1801839886  | 1.5143418276  | 1.1664646950  |
|                          |            | H             | 1.0           | 3.8067076086  | 1.1448549271  | -2.8962248483 |
|                          |            | C             | 6.0           | 4.5608392318  | 1.0187615825  | 0.4240862855  |
|                          |            | C             | 6.0           | 3.7889921398  | 0.8146543298  | -1.8626063790 |
|                          |            | C             | 6.0           | 3.2509862025  | 0.6536851513  | -5.7150032917 |
|                          |            | C             | 6.0           | 3.2839921823  | -1.7442321094 | -5.9635073217 |
|                          |            | H             | 1.0           | 2.7444632730  | 1.5465229177  | -5.3596952099 |
|                          |            | C             | 6.0           | 3.7184656791  | -0.0283720940 | 0.7988791049  |
|                          |            | H             | 1.0           | 2.7691385187  | -1.5429082152 | -3.1604170238 |
|                          |            | H             | 1.0           | 2.8191633695  | -2.7147730517 | -5.8059345852 |
|                          |            | C             | 6.0           | 2.9379545698  | -0.2369385643 | -1.4987387281 |
|                          |            | C             | 6.0           | 2.6428490666  | -0.5920415011 | -5.4997601177 |
|                          |            | H             | 1.0           | 3.6557292135  | -0.3416417572 | 1.8365989771  |
|                          |            | C             | 6.0           | 2.9200607382  | -0.6529618189 | -0.1622442461 |
|                          |            | C             | 6.0           | 2.0895429824  | -0.9480827120 | -2.5411587496 |
|                          |            | N             | 7.0           | 1.3254823401  | -0.0774810728 | -3.4567958485 |
|                          |            | H             | 1.0           | 0.7860659354  | 2.0101128956  | -1.8967740140 |
|                          |            | H             | 1.0           | 5.1480306363  | -0.2369908032 | 4.7975843453  |
|                          |            | C             | 6.0           | 1.2924651511  | -0.6517551427 | -4.8124328958 |
|                          |            | H             | 1.0           | 2.2570600539  | -1.4625027592 | 0.1350838336  |
|                          |            | H             | 1.0           | 0.6624682547  | 0.6113404995  | -0.8490412689 |
|                          |            | H             | 1.0           | 1.4248465874  | -1.6727003054 | -2.0375336241 |
|                          |            | H             | 1.0           | -0.2342930206 | 2.8488893398  | -3.7726543151 |
|                          |            | C             | 6.0           | 0.1577556493  | 1.1474930476  | -1.6497263605 |
|                          |            | H             | 1.0           | 0.6038681881  | -0.0592609279 | -5.4149319880 |
|                          |            | H             | 1.0           | 0.9157389958  | -1.6921490243 | -4.8221451576 |
|                          |            | O             | 8.0           | -0.2765140259 | 2.1826289792  | -4.4736235504 |
|                          |            | C             | 6.0           | 4.5975611907  | -0.9698810804 | 5.3873051257  |
| C                        | 6.0        | -0.0019647155 | 0.2795950854  | -2.9112859821 |               |               |
| H                        | 1.0        | 4.6426489837  | -0.6907041509 | 6.4467099056  |               |               |
| H                        | 1.0        | 5.0505229367  | -1.9592046546 | 5.2507034422  |               |               |
| C                        | 6.0        | -0.9112971468 | 1.0406509360  | -3.9095007576 |               |               |

|   |     |               |               |               |
|---|-----|---------------|---------------|---------------|
| O | 8.0 | 3.2641362280  | -0.9300318017 | 4.8919357398  |
| H | 1.0 | -0.9935094384 | 2.4326992002  | -0.3464271016 |
| H | 1.0 | 0.5706094903  | 0.8394962040  | 2.2677719438  |
| H | 1.0 | -0.5592500545 | -0.6357012098 | -2.6298244561 |
| H | 1.0 | -1.1673867181 | 0.3960530026  | -4.7559800671 |
| C | 6.0 | -1.1693852683 | 1.6518270370  | -1.0934535863 |
| O | 8.0 | 1.4236764822  | 0.0938314957  | 3.3723968276  |
| O | 8.0 | -1.9703396269 | 2.2745407517  | -2.0905165123 |
| H | 1.0 | -2.7063994721 | 3.0676151033  | -4.5358710287 |
| O | 8.0 | -0.2904436021 | 0.9621969050  | 1.7646123077  |
| C | 6.0 | -2.2356181868 | 1.4190840052  | -3.2198928023 |
| H | 1.0 | 3.6369557554  | -2.6813495033 | 6.8764992103  |
| C | 6.0 | 2.3283133441  | -1.7306022596 | 5.4465256396  |
| O | 8.0 | -1.8355701709 | 0.5590443371  | -0.4918936279 |
| C | 6.0 | -3.1883176052 | 2.1736655162  | -4.1339816534 |
| C | 6.0 | 0.6082542344  | -0.7191745015 | 3.8604911561  |
| C | 6.0 | 2.6286329843  | -2.6234463866 | 6.4879170854  |
| H | 1.0 | -2.7149035593 | 0.4980953050  | -2.8617763801 |
| H | 1.0 | -2.6546550143 | 1.9275133605  | 0.8216296884  |
| H | 1.0 | -3.4905494731 | 1.5405251687  | -4.9740307430 |
| C | 6.0 | -1.1414314391 | 0.0771985986  | 2.2933835327  |
| C | 6.0 | 0.9981514842  | -1.6579986505 | 4.9418375724  |
| C | 6.0 | -2.7825611492 | 0.8728344204  | 0.5372412753  |
| H | 1.0 | -4.0844770528 | 2.4705219145  | -3.5829245870 |
| H | 1.0 | -4.9467475308 | 3.4190129368  | 0.8065808254  |
| C | 6.0 | -0.7680245370 | -0.7625064770 | 3.3584707429  |
| H | 1.0 | -6.2282183675 | 3.6660458875  | 2.0097672779  |
| C | 6.0 | -2.4640437139 | 0.0149359884  | 1.7540570689  |
| H | 1.0 | -4.4706389733 | 1.4670064348  | -0.6740175458 |
| C | 6.0 | 1.6425255680  | -3.4421657654 | 7.0315683655  |
| C | 6.0 | -5.8294318885 | 2.9662248619  | 1.2742026052  |
| C | 6.0 | -4.1946727309 | 0.6397386362  | -0.0155534826 |
| H | 1.0 | 1.9010682443  | -4.1230356073 | 7.8369291422  |
| C | 6.0 | 0.0232097053  | -2.5129670171 | 5.5126513147  |
| H | 1.0 | -6.5579988706 | 2.7751442030  | 0.4832231635  |
| H | 1.0 | -4.1737990868 | -0.2674514738 | -0.6282814816 |
| C | 6.0 | -1.7393412938 | -1.6324062231 | 3.9293374887  |
| C | 6.0 | 0.34111114814 | -3.3943245919 | 6.5483080327  |
| C | 6.0 | -5.4372359053 | 1.6772633068  | 1.9712986440  |
| C | 6.0 | -3.4212842835 | -0.7883504389 | 2.3524535598  |
| C | 6.0 | -1.3825961954 | -2.5140137236 | 5.0261381927  |
| C | 6.0 | -5.2462009514 | 0.4231805504  | 1.0723253140  |
| C | 6.0 | -3.0568884797 | -1.6292394471 | 3.4438374544  |
| O | 8.0 | -5.3199887171 | 1.6086563604  | 3.1801580400  |

|                       |            |   |     |               |               |               |
|-----------------------|------------|---|-----|---------------|---------------|---------------|
|                       |            | H | 1.0 | -0.4433070080 | -4.0238541950 | 6.9499585074  |
|                       |            | C | 6.0 | -4.8614491762 | -0.8064659682 | 1.8984093768  |
|                       |            | O | 8.0 | -6.4879956134 | 0.2075098774  | 0.3852153990  |
|                       |            | O | 8.0 | -2.2239828197 | -3.2713440873 | 5.5582818555  |
|                       |            | H | 1.0 | -5.0478428281 | -1.6933874954 | 1.2794865861  |
|                       |            | H | 1.0 | -5.5005507299 | -0.8918949869 | 2.7816883707  |
|                       |            | H | 1.0 | -7.1394302409 | -0.0826438946 | 1.0401487495  |
|                       |            | H | 1.0 | -3.5693787948 | -2.9217334655 | 4.7025050819  |
|                       |            | O | 8.0 | -4.0089421213 | -2.4129267289 | 3.9639344225  |
| N,N-diethyladriamycin | 70844-09-6 | H | 1.0 | -2.2050997465 | -6.8519243335 | -3.3512364011 |
|                       |            | H | 1.0 | -2.4855731537 | -4.6357095907 | -4.0708047529 |
|                       |            | H | 1.0 | 3.0601055105  | 2.3162568467  | -4.3908436287 |
|                       |            | H | 1.0 | -1.7515154695 | -7.7680128435 | -1.9122329890 |
|                       |            | H | 1.0 | -4.9353226805 | -4.0933535903 | -4.0170053582 |
|                       |            | H | 1.0 | -0.6082134282 | -6.6291348196 | -2.6327594954 |
|                       |            | C | 6.0 | -1.6662774194 | -6.7908724893 | -2.4001486346 |
|                       |            | O | 8.0 | 2.6416415489  | 3.0346935803  | -3.8960642883 |
|                       |            | H | 1.0 | -4.5984911453 | -5.4990435288 | -3.0087686806 |
|                       |            | C | 6.0 | -4.4166133756 | -4.4255409369 | -3.1119332003 |
|                       |            | C | 6.0 | -2.9279696654 | -4.0884868043 | -3.2151182823 |
|                       |            | H | 1.0 | -0.3682500634 | -3.8326656525 | -2.9836164229 |
|                       |            | H | 1.0 | 0.8716029601  | 1.2973078239  | -3.2002157493 |
|                       |            | H | 1.0 | -2.8454293202 | -3.0274811006 | -3.4676521673 |
|                       |            | H | 1.0 | 2.4126588790  | 0.4596426080  | -2.9664288342 |
|                       |            | H | 1.0 | 0.6785613794  | 3.7916969725  | -2.6630910869 |
|                       |            | H | 1.0 | 0.8432260752  | -1.4679499847 | -2.7106998646 |
|                       |            | H | 1.0 | -1.6105996686 | -1.6797630422 | -2.5948679542 |
|                       |            | C | 6.0 | -2.2380990759 | -5.6938876091 | -1.4828668230 |
|                       |            | H | 1.0 | -3.2893964276 | -5.9240738874 | -1.2798249569 |
|                       |            | C | 6.0 | 2.4254006241  | 2.5858925464  | -2.5543833760 |
|                       |            | C | 6.0 | 1.7410057618  | 1.2142880492  | -2.5394003943 |
|                       |            | N | 7.0 | -2.1834456687 | -4.3103000113 | -1.9716691208 |
|                       |            | H | 1.0 | -4.8641453426 | -3.9187854731 | -2.2515475008 |
|                       |            | C | 6.0 | -0.8606313937 | -3.6620809851 | -2.0036947572 |
|                       |            | C | 6.0 | 1.4784249044  | 3.6256472037  | -1.9299920713 |
|                       |            | H | 1.0 | 1.8246778323  | -3.4684865059 | -2.1250856475 |
|                       |            | H | 1.0 | 1.9793287955  | 4.5903366636  | -1.8146805568 |
|                       |            | C | 6.0 | -1.0175998273 | -2.1375396177 | -1.7992403499 |
|                       |            | H | 1.0 | -1.7480076769 | -5.7168888192 | -0.5080330304 |
|                       |            | C | 6.0 | 3.7644931655  | 2.5810791741  | -1.8008274292 |
|                       |            | O | 8.0 | 3.9790261163  | 1.8404874041  | -0.8541789995 |
|                       |            | C | 6.0 | 0.3274172435  | -1.4219964104 | -1.7301970496 |
|                       |            | H | 1.0 | 4.4415226514  | 4.5598223459  | -2.3052070999 |

|   |     |               |               |               |
|---|-----|---------------|---------------|---------------|
| H | 1.0 | 5.1440315232  | 3.2816176981  | -3.2776228794 |
| H | 1.0 | 0.3522265174  | -5.2454693222 | -1.1182141910 |
| C | 6.0 | 4.8593121636  | 3.5433810354  | -2.2458861451 |
| O | 8.0 | 0.0786812816  | -0.1007256981 | -1.3542004954 |
| C | 6.0 | 0.1465595375  | -4.1845861312 | -0.9487024534 |
| C | 6.0 | 1.2386454383  | 0.7352262462  | -1.1624296186 |
| C | 6.0 | 1.4660606152  | -3.3988395431 | -1.0837068715 |
| H | 1.0 | -1.5484213678 | -1.9594520793 | -0.8591460583 |
| O | 8.0 | 1.1879295324  | -2.0283830051 | -0.7681306873 |
| C | 6.0 | 0.9046947933  | 3.1904072992  | -0.6034833753 |
| H | 1.0 | 2.0100791170  | 0.1559412761  | -0.6515767538 |
| O | 8.0 | 0.5525759873  | 5.4795330285  | -0.1278174570 |
| H | 1.0 | 2.8629437631  | -4.8933592080 | -0.3922278598 |
| C | 6.0 | 0.8095710106  | 1.8580677116  | -0.2364251672 |
| C | 6.0 | 2.5559616662  | -3.8745911959 | -0.1359656011 |
| H | 1.0 | 3.4273109609  | -3.2185114934 | -0.2041225281 |
| O | 8.0 | -0.3373820700 | -4.0795044059 | 0.3838481506  |
| O | 8.0 | 5.9577625579  | 3.4911132621  | -1.3802840550 |
| C | 6.0 | 0.4627829366  | 4.2091702677  | 0.2881998516  |
| H | 1.0 | 0.2007125233  | 6.0362139843  | 0.6245313200  |
| H | 1.0 | 5.7461937253  | 2.7913614356  | -0.7367907004 |
| H | 1.0 | -0.2454485282 | -3.1466581878 | 0.6339302618  |
| H | 1.0 | 2.1902929030  | -3.8736776566 | 0.8929422554  |
| C | 6.0 | 0.3344994267  | 1.5068766613  | 1.0679057073  |
| C | 6.0 | -0.0489660175 | 3.8720676908  | 1.5511124939  |
| O | 8.0 | 0.3470725520  | 0.2200502262  | 1.4137367726  |
| C | 6.0 | -0.1053532257 | 2.5089471793  | 1.9548328153  |
| O | 8.0 | -0.4419652307 | 6.1314914081  | 2.1128612111  |
| C | 6.0 | -0.4956964512 | 4.9261241586  | 2.4445554684  |
| H | 1.0 | -0.0041175964 | 0.1963386430  | 2.3534097482  |
| C | 6.0 | -0.5961233837 | 2.1275390656  | 3.2837932864  |
| C | 6.0 | -1.0281374538 | 4.5498159970  | 3.7801625202  |
| O | 8.0 | -0.5966643094 | 0.9262711338  | 3.6267688106  |
| H | 1.0 | -1.4024547708 | 6.6029216132  | 4.2422339130  |
| C | 6.0 | -1.0837175849 | 3.1959747684  | 4.1929721267  |
| C | 6.0 | -1.4693913479 | 5.5854522182  | 4.6072141627  |
| C | 6.0 | -1.6101410070 | 2.9136083082  | 5.4862704691  |
| C | 6.0 | -1.9781116663 | 5.2875434722  | 5.8649087982  |
| O | 8.0 | -1.6684493965 | 1.6246820230  | 5.8792182764  |
| C | 6.0 | -2.0501623451 | 3.9681500353  | 6.3031335628  |
| H | 1.0 | -2.3241675213 | 6.0842200331  | 6.5165609736  |
| C | 6.0 | -2.1934449284 | 1.3075464084  | 7.1621600092  |
| H | 1.0 | -3.2390445851 | 1.6235715283  | 7.2607191844  |
| H | 1.0 | -2.1355623747 | 0.2217504974  | 7.2381963594  |

|                        |            |               |               |               |               |               |
|------------------------|------------|---------------|---------------|---------------|---------------|---------------|
|                        |            | H             | 1.0           | -2.4510015170 | 3.7587051176  | 7.2864483978  |
|                        |            | H             | 1.0           | -1.5992553891 | 1.7599869202  | 7.9653467510  |
| N,N-dimethyladriamycin | 67106-76-7 | H             | 1.0           | 3.3633584971  | 0.4360563807  | -6.0746623568 |
|                        |            | H             | 1.0           | 5.6111551685  | 1.5444561224  | -5.9637403273 |
|                        |            | C             | 6.0           | 3.8459493215  | 0.6435981389  | -5.1275674832 |
|                        |            | O             | 8.0           | 1.3814717189  | -0.5764472639 | -5.2274436965 |
|                        |            | C             | 6.0           | 5.0906879253  | 1.2569762414  | -5.0552154069 |
|                        |            | H             | 1.0           | -0.0462665172 | -1.2946266556 | -4.8684226018 |
|                        |            | O             | 8.0           | -0.6831677059 | -1.6331038643 | -4.1787766006 |
|                        |            | C             | 6.0           | 1.8588508358  | -0.3733042823 | -4.0905149489 |
|                        |            | C             | 6.0           | 3.1882778287  | 0.2795517078  | -3.9508908102 |
|                        |            | H             | 1.0           | 6.6532422780  | 1.9889999419  | -3.7888875761 |
|                        |            | C             | 6.0           | 5.6834182764  | 1.5097397929  | -3.8215033035 |
|                        |            | C             | 6.0           | -0.1136365481 | -1.3797525476 | -2.9952965556 |
|                        |            | C             | 6.0           | 1.1431908749  | -0.7612963382 | -2.8860207898 |
|                        |            | H             | 1.0           | -5.8432029026 | -2.4965651989 | -1.2252347390 |
|                        |            | C             | 6.0           | 3.7615579767  | 0.5201485081  | -2.6771656189 |
|                        |            | H             | 1.0           | -2.7401402826 | -1.9189979515 | -2.7813409251 |
|                        |            | C             | 6.0           | 5.0380041603  | 1.1505973805  | -2.6265738104 |
|                        |            | H             | 1.0           | -5.5661899262 | -2.9258790736 | 0.4493494719  |
|                        |            | H             | 1.0           | -1.9943735322 | -3.4583866839 | -2.3976382050 |
|                        |            | C             | 6.0           | -5.5207788035 | -3.3250811607 | -0.5751944147 |
|                        |            | C             | 6.0           | -2.1668075205 | -2.4454415975 | -2.0126889902 |
|                        |            | H             | 1.0           | 6.8390666273  | 3.0162013280  | -1.7644304703 |
|                        |            | O             | 8.0           | -6.3291990428 | -4.4595296564 | -0.7261811194 |
|                        |            | H             | 1.0           | 7.6356367568  | 1.4134297188  | -1.8145718917 |
|                        |            | C             | 6.0           | -0.8341251234 | -1.7626710933 | -1.8253526236 |
|                        |            | C             | 6.0           | 1.7152171145  | -0.5223826911 | -1.6051590559 |
|                        |            | O             | 8.0           | 5.5825796954  | 1.3807861361  | -1.4148619027 |
|                        |            | C             | 6.0           | 3.0285356890  | 0.1133704756  | -1.4541747113 |
|                        |            | C             | 6.0           | 6.8552971135  | 2.0104933072  | -1.3277041245 |
|                        |            | H             | 1.0           | -5.7348666486 | -5.1561617302 | -1.0570597806 |
|                        |            | C             | 6.0           | -4.0739234575 | -3.6358154331 | -0.9072858696 |
|                        |            | C             | 6.0           | -3.0196208470 | -2.5358070917 | -0.7317329214 |
|                        |            | C             | 6.0           | -0.2763857439 | -1.5267067503 | -0.5791704653 |
| O                      | 8.0        | -3.7112390858 | -1.3200127672 | -0.4828675413 |               |               |
| O                      | 8.0        | 3.4990909908  | 0.2976266831  | -0.3102214257 |               |               |
| C                      | 6.0        | 1.0021977784  | -0.9084580860 | -0.4577385422 |               |               |
| H                      | 1.0        | 7.0695381385  | 2.0834069302  | -0.2614917793 |               |               |
| H                      | 1.0        | -3.1786389169 | -0.7966645178 | 0.1413077125  |               |               |
| O                      | 8.0        | -3.7682449545 | -4.7556087730 | -1.2883693872 |               |               |
| H                      | 1.0        | -1.6601738384 | -3.8992183154 | 0.2545717968  |               |               |
| C                      | 6.0        | -2.1161720094 | -2.9249426596 | 0.4588831299  |               |               |



|                         |            |   |     |               |               |               |
|-------------------------|------------|---|-----|---------------|---------------|---------------|
|                         |            | C | 6.0 | -1.0212486780 | -1.8785314604 | 0.6902538496  |
|                         |            | H | 1.0 | 2.3920571766  | -0.2947285692 | 0.6356459380  |
|                         |            | O | 8.0 | 1.4948318250  | -0.7307876515 | 0.7745538772  |
|                         |            | H | 1.0 | -2.5942382771 | 1.6236935076  | 1.3730431240  |
|                         |            | O | 8.0 | -1.5964307254 | -0.6397416070 | 1.1764467268  |
|                         |            | H | 1.0 | -2.7205681749 | -3.0298585215 | 1.3665358542  |
|                         |            | H | 1.0 | -0.3007434069 | -2.2476098156 | 1.4284839516  |
|                         |            | H | 1.0 | -5.0128757184 | 1.5836296889  | 2.0056735456  |
|                         |            | H | 1.0 | -4.3019396290 | 3.1933829978  | 2.2491272766  |
|                         |            | H | 1.0 | -0.2398501401 | 1.7231309823  | 1.9712284622  |
|                         |            | C | 6.0 | -2.8984608234 | 1.5670538906  | 2.4257911556  |
|                         |            | C | 6.0 | -4.2895990603 | 2.1546271239  | 2.5929892365  |
|                         |            | H | 1.0 | 0.6522827654  | 4.1207618781  | 3.0522637333  |
|                         |            | C | 6.0 | -1.8124319311 | -0.5561481943 | 2.5989036763  |
|                         |            | O | 8.0 | -2.9914668234 | 0.1711918974  | 2.8088004808  |
|                         |            | H | 1.0 | -1.7777506653 | 3.3020841539  | 2.9902580780  |
|                         |            | H | 1.0 | 2.1684449030  | 1.9918502702  | 2.3798093066  |
|                         |            | H | 1.0 | -2.0149126488 | -1.5604085120 | 2.9917378786  |
|                         |            | C | 6.0 | -0.4606914861 | 1.5724975467  | 3.0467893991  |
|                         |            | C | 6.0 | -1.8295955089 | 2.2515214425  | 3.2922803733  |
|                         |            | H | 1.0 | -4.5890480602 | 2.1384483531  | 3.6431241802  |
|                         |            | H | 1.0 | 0.2915205088  | -0.4785834327 | 2.9833650512  |
|                         |            | C | 6.0 | -0.6023470662 | 0.0586730469  | 3.3040099986  |
|                         |            | C | 6.0 | 0.5938830241  | 3.5759338016  | 4.0151358053  |
|                         |            | H | 1.0 | -0.3068362861 | 3.8869942833  | 4.5470173152  |
|                         |            | N | 7.0 | 0.6226478511  | 2.1233200561  | 3.8759771994  |
|                         |            | C | 6.0 | 1.9362202099  | 1.6808489565  | 3.4167251883  |
|                         |            | H | 1.0 | 1.4536012765  | 3.8844905399  | 4.6173216482  |
|                         |            | H | 1.0 | 2.0223182162  | 0.5931147750  | 3.4658017228  |
|                         |            | H | 1.0 | -2.4769556920 | 1.3591570754  | 4.8873231555  |
|                         |            | O | 8.0 | -2.2132028029 | 2.2625773994  | 4.6615720188  |
|                         |            | H | 1.0 | -0.7100282958 | -0.0977044326 | 4.3838060116  |
|                         |            | H | 1.0 | 2.7049902973  | 2.0977548420  | 4.0740603332  |
| N,N-dimethyl-daunomycin | 70095-84-0 | H | 1.0 | 5.3007942795  | -1.8974865987 | -2.2928685657 |
|                         |            | H | 1.0 | 1.5135367622  | -1.2228323937 | -3.5580628374 |
|                         |            | H | 1.0 | 0.5572395857  | 0.7107114334  | -2.3742802239 |
|                         |            | H | 1.0 | 5.5018436524  | -3.4537614162 | -3.1686523032 |
|                         |            | C | 6.0 | 4.9306544463  | -2.9210436646 | -2.4077096385 |
|                         |            | H | 1.0 | 2.8374825485  | -0.2715247979 | -2.8944309172 |
|                         |            | H | 1.0 | 2.9899782489  | 1.5435748488  | -1.7596472183 |
|                         |            | C | 6.0 | 1.9880901246  | -0.9073116467 | -2.6231063591 |
|                         |            | H | 1.0 | 1.0568037624  | -3.6679164977 | -2.4594724460 |
|                         |            | C | 6.0 | 0.9813689855  | -0.1094033984 | -1.7881853247 |

|   |     |               |               |               |
|---|-----|---------------|---------------|---------------|
| C | 6.0 | 3.4704305325  | -2.9132790895 | -2.7921928721 |
| H | 1.0 | 5.0552122710  | -3.3940935137 | -1.4287513168 |
| O | 8.0 | -1.4876936482 | 0.9512415852  | -1.0721012867 |
| O | 8.0 | 3.0550408054  | -3.4506226793 | -3.8029000799 |
| H | 1.0 | -2.4222213785 | 1.1733261523  | -0.7698251831 |
| C | 6.0 | -0.1377341472 | -0.9852956187 | -1.2632791422 |
| H | 1.0 | 3.7834644361  | 1.0138783635  | 0.6070383287  |
| C | 6.0 | 2.4849932232  | -2.1610675435 | -1.8691392362 |
| C | 6.0 | 1.2850487483  | -3.0772280724 | -1.5636695040 |
| C | 6.0 | -1.3701438179 | -0.3696803838 | -0.8927144903 |
| C | 6.0 | 2.3708530779  | 1.6678824143  | -0.8630520017 |
| H | 1.0 | 4.0073147057  | 2.6766943334  | 0.0841271403  |
| C | 6.0 | 0.0315652118  | -2.3553698704 | -1.1332635131 |
| C | 6.0 | 3.2502143261  | 1.9346603765  | 0.3586247056  |
| O | 8.0 | 1.6300560001  | 0.4705251692  | -0.6166330824 |
| O | 8.0 | -3.8068192562 | 0.7494279050  | -0.1600827162 |
| H | 1.0 | 4.4112743797  | 0.9979297286  | 2.6264165908  |
| C | 6.0 | -2.4237394125 | -1.1416471558 | -0.3726456529 |
| C | 6.0 | -1.0345007490 | -3.1460953150 | -0.6094178822 |
| C | 6.0 | -3.6803708707 | -0.4842834394 | 0.0001996771  |
| H | 1.0 | 1.5764486734  | -3.7943858918 | -0.7901393655 |
| H | 1.0 | -8.2689283340 | 0.7600081650  | 0.6464531678  |
| O | 8.0 | 1.5244286425  | 2.7514402881  | -1.1715014733 |
| C | 6.0 | -2.2452708316 | -2.5459433917 | -0.2268231588 |
| O | 8.0 | -0.8279517973 | -4.4635524550 | -0.5037558166 |
| H | 1.0 | -7.3212118216 | 2.2238005149  | 1.0243533684  |
| O | 8.0 | -6.1945465173 | 0.5717806670  | 0.8359554058  |
| H | 1.0 | 2.7017105249  | -1.0638702005 | -0.2769210055 |
| O | 8.0 | 3.1860315745  | -1.8033760013 | -0.6826435531 |
| C | 6.0 | -4.7729922280 | -1.3144422139 | 0.5639723296  |
| H | 1.0 | -1.6685020681 | -4.8433124811 | -0.1225017007 |
| C | 6.0 | -7.4294763854 | 1.1586756621  | 1.2287114066  |
| C | 6.0 | -3.3161938565 | -3.3695327259 | 0.3087530279  |
| C | 6.0 | -6.0199177350 | -0.7587001343 | 0.9712197396  |
| C | 6.0 | -4.5888586458 | -2.7118922995 | 0.7091516377  |
| H | 1.0 | 2.6705848928  | 4.6066958141  | -0.2220998941 |
| C | 6.0 | 3.9169397071  | 1.6759523754  | 3.3268398004  |
| O | 8.0 | -3.1872307987 | -4.6061225094 | 0.4387237378  |
| H | 1.0 | 3.1318369742  | 1.1006464458  | 3.8561412341  |
| H | 1.0 | 4.6642104295  | 1.9834668154  | 4.0646114685  |
| C | 6.0 | 2.4649046736  | 2.4908335671  | 1.5644379137  |
| C | 6.0 | -7.0167268005 | -1.5978752559 | 1.4956041617  |
| C | 6.0 | -5.5923222794 | -3.5300219715 | 1.2326404030  |
| H | 1.0 | -7.9660733795 | -1.1808894202 | 1.8057671881  |

|                          |                            |                                                                                                                                                                                                                                                                                                                                                                                                                                                                                                                                                                                                                                                                                                                                                                                                                                                                                                                                                                                                                                                                                                                                                                                                                                                  |
|--------------------------|----------------------------|--------------------------------------------------------------------------------------------------------------------------------------------------------------------------------------------------------------------------------------------------------------------------------------------------------------------------------------------------------------------------------------------------------------------------------------------------------------------------------------------------------------------------------------------------------------------------------------------------------------------------------------------------------------------------------------------------------------------------------------------------------------------------------------------------------------------------------------------------------------------------------------------------------------------------------------------------------------------------------------------------------------------------------------------------------------------------------------------------------------------------------------------------------------------------------------------------------------------------------------------------|
|                          |                            | H 1.0 1.7564153353 1.7146526066 1.9161802129<br>C 6.0 0.6813982978 3.1691955190 -0.0679494610<br>C 6.0 -6.8010753423 -2.9671763316 1.6229164226<br>H 1.0 -5.3995549301 -4.5920773274 1.3211981756<br>N 7.0 3.4027013259 2.8542280189 2.6384382109<br>H 1.0 -7.6250916396 1.0117149324 2.2977054757<br>O 8.0 2.3416397955 4.7980179004 0.6682422325<br>H 1.0 0.0999049534 2.3066434225 0.2708592928<br>H 1.0 -0.8129504814 3.8314982831 -1.4648100703<br>H 1.0 0.3004129114 5.1168579784 -0.9339281671<br>H 1.0 -7.5883081400 -3.5937215468 2.0312130809<br>C 6.0 1.5826193997 3.6640006061 1.0728534870<br>C 6.0 -0.2558580816 4.2321957426 -0.6149999737<br>H 1.0 0.9400007290 4.0063792406 1.8901864499<br>C 6.0 2.8931407356 3.8265700470 3.5994465860<br>H 1.0 -0.9686233950 4.5363658394 0.1578653419<br>H 1.0 3.6690026795 4.0124474655 4.3484943936<br>H 1.0 1.9856139102 3.4926290694 4.1397852301<br>H 1.0 2.6824244919 4.7739628420 3.1010624485                                                                                                                                                                                                                                                                                       |
| Doxorubicin / Adriamycin | 25316-40-9 /<br>23214-92-8 | H 1.0 -2.8772485779 -4.6502763132 -0.6886418945<br>H 1.0 -2.7986664526 -3.9643471811 0.7949805328<br>H 1.0 7.3885981685 -1.1018134409 2.3941352183<br>H 1.0 6.6033080397 -3.3831842697 -1.5392507530<br>N 7.0 -2.8114742562 -3.7597029746 -0.2013175347<br>H 1.0 7.3216725637 -1.9907646121 0.1088403613<br>O 8.0 -4.2353305650 -4.2565304986 -2.5177025706<br>C 6.0 6.4917959093 -0.9685787497 1.7965343815<br>H 1.0 -1.8667202455 -3.5313730697 -3.6157653864<br>C 6.0 6.4552626311 -1.4731479136 0.4996700339<br>H 1.0 -4.3983939549 -4.2414123376 -3.4696406544<br>H 1.0 -1.3409238309 -2.9392878906 -2.0406615156<br>H 1.0 -4.9250007817 -3.4030089835 -0.0990277222<br>H 1.0 5.3964493461 0.1011165512 3.3297070037<br>C 6.0 6.3615335779 -2.4788009968 -2.1106522241<br>C 6.0 -4.0043906044 -2.9655265151 -0.5229061491<br>C 6.0 5.3939778925 -0.3005277295 2.3239702890<br>C 6.0 -1.7933715322 -2.6391615841 -2.9862395847<br>H 1.0 6.0609893030 -2.7595434357 -3.1200996433<br>H 1.0 7.2464184282 -1.8329294467 -2.1623405987<br>C 6.0 5.3115614513 -1.3174008004 -0.3008440158<br>C 6.0 -4.2156856701 -2.9099999755 -2.0453318693<br>O 8.0 5.2431758585 -1.7937884530 -1.5608730455<br>H 1.0 -1.1483645692 -1.9104782297 -3.4842465904 |

|   |     |               |               |               |
|---|-----|---------------|---------------|---------------|
| C | 6.0 | 4.2474080285  | -0.1367792820 | 1.5431374033  |
| H | 1.0 | -3.5711680069 | -1.5597560833 | 1.0793072343  |
| C | 6.0 | 4.1742353863  | -0.6361182689 | 0.2199728995  |
| H | 1.0 | -1.8114478540 | -1.2031926649 | -0.6476273045 |
| C | 6.0 | -3.1824465308 | -2.0264863195 | -2.7883480984 |
| C | 6.0 | -3.8506348253 | -1.5354161388 | 0.0198404846  |
| H | 1.0 | -5.1976416317 | -2.4365242667 | -2.2019700731 |
| C | 6.0 | 3.1021813437  | 0.5841739428  | 2.1590251774  |
| O | 8.0 | 3.2027127055  | 1.0252858818  | 3.3262291708  |
| H | 1.0 | -3.5957957602 | -1.8113076973 | -3.7838459022 |
| C | 6.0 | -2.8075996048 | -0.7577754956 | -0.7722951203 |
| H | 1.0 | -4.7996446865 | -0.9941506744 | -0.0613406469 |
| C | 6.0 | 2.9347714688  | -0.4372579923 | -0.5734785836 |
| H | 1.0 | 1.7540602786  | 1.7195603307  | 3.5441867027  |
| C | 6.0 | 1.8857048427  | 0.7572214211  | 1.3845280157  |
| O | 8.0 | 0.8429296054  | 1.9455187608  | 3.2000784192  |
| O | 8.0 | -3.1536357158 | -0.7401022570 | -2.1580797912 |
| C | 6.0 | 1.8072320262  | 0.2645373780  | 0.0507960952  |
| C | 6.0 | 0.7912828357  | 1.4335029480  | 1.9584936690  |
| O | 8.0 | 2.8367311396  | -0.8500352893 | -1.7479713760 |
| H | 1.0 | -2.4425280341 | 1.6694146016  | 1.8482164908  |
| H | 1.0 | 1.3658152860  | -0.4044435710 | -2.1742788703 |
| C | 6.0 | 0.6250094283  | 0.4655016043  | -0.6920392682 |
| C | 6.0 | -0.3994416101 | 1.6029969761  | 1.2089592788  |
| O | 8.0 | -2.8247280372 | 0.5687482043  | -0.3245295355 |
| O | 8.0 | 0.4957067630  | 0.0414753226  | -1.9542677227 |
| H | 1.0 | -1.3773987353 | 2.7730026573  | 2.7317905849  |
| C | 6.0 | -0.4731434915 | 1.1421343096  | -0.0967365969 |
| C | 6.0 | -1.5892691220 | 2.3475077163  | 1.7515584752  |
| C | 6.0 | -1.7668100319 | 1.4059587665  | -0.8479506332 |
| H | 1.0 | -1.6422207157 | 1.1850974665  | -1.9088473419 |
| C | 6.0 | -2.0261043422 | 3.4492674007  | 0.7460678461  |
| O | 8.0 | -1.6934612560 | 5.2506317655  | 3.0019977789  |
| H | 1.0 | 0.2707015101  | 4.7955734193  | 2.4539998165  |
| C | 6.0 | -2.2215190886 | 2.8632697998  | -0.6694395607 |
| H | 1.0 | -1.3276187279 | 5.2252072545  | 3.8938804248  |
| H | 1.0 | -3.1149669200 | 4.4427289280  | 2.0132429990  |
| H | 1.0 | -3.2874210437 | 2.9091661997  | -0.9017762816 |
| O | 8.0 | -3.2604946289 | 4.0448037365  | 1.1381782868  |
| C | 6.0 | -0.6248032090 | 5.2936080483  | 2.0562319808  |
| C | 6.0 | -0.9513324514 | 4.5711419642  | 0.7401988390  |
| H | 1.0 | -1.6838216074 | 3.4874423430  | -1.3870820666 |
| O | 8.0 | -0.3142560182 | 4.8889118880  | -0.2435625627 |
| H | 1.0 | -0.3552213350 | 6.3257878168  | 1.8033945331  |

|             |            |   |     |               |               |               |
|-------------|------------|---|-----|---------------|---------------|---------------|
|             |            |   |     |               |               |               |
| Duborimycin | NSC 180510 | H | 1.0 | 0.2444309909  | 3.7353204729  | -7.9991227196 |
|             |            | H | 1.0 | -1.0452247867 | 1.8053400851  | -7.0486192505 |
|             |            | C | 6.0 | 0.4327603081  | 3.3884314696  | -6.9875178143 |
|             |            | H | 1.0 | 1.9483492321  | 4.8594686581  | -6.6383819665 |
|             |            | C | 6.0 | -0.2865603833 | 2.3186182904  | -6.4707373473 |
|             |            | C | 6.0 | 1.3998912266  | 4.0273857545  | -6.2163130765 |
|             |            | H | 1.0 | 3.9232990743  | 5.0258406324  | -5.5237879983 |
|             |            | O | 8.0 | -1.6883615593 | 0.2015658456  | -5.4115328931 |
|             |            | C | 6.0 | -0.0336070090 | 1.8835577288  | -5.1675824682 |
|             |            | H | 1.0 | 2.6708163684  | 6.1450513402  | -4.9042125818 |
|             |            | C | 6.0 | 1.6685077315  | 3.6041197084  | -4.9044468683 |
|             |            | C | 6.0 | 3.3295348683  | 5.3071393993  | -4.6455541271 |
|             |            | C | 6.0 | -0.8373598273 | 0.7368232324  | -4.6667809387 |
|             |            | C | 6.0 | 0.9446657260  | 2.5074539704  | -4.3545866923 |
|             |            | H | 1.0 | -2.2884496120 | -0.9633133137 | -4.4415885478 |
|             |            | O | 8.0 | 2.5973801024  | 4.2028930202  | -4.1299118893 |
|             |            | H | 1.0 | 3.9994607319  | 5.6109954705  | -3.8410633062 |
|             |            | O | 8.0 | -2.2871035399 | -1.4321573920 | -3.5596730980 |
|             |            | C | 6.0 | -0.6110750766 | 0.2683256034  | -3.3110950129 |
|             |            | C | 6.0 | 1.1836949572  | 2.0079764538  | -2.9760872928 |
|             |            | C | 6.0 | -1.3634369655 | -0.8094690914 | -2.8170930966 |
|             |            | C | 6.0 | 0.3726902424  | 0.8886498863  | -2.4896231714 |
|             |            | O | 8.0 | 2.0508072886  | 2.5181183646  | -2.2342233072 |
|             |            | C | 6.0 | -1.1636503022 | -1.2839128543 | -1.4864604507 |
|             |            | H | 1.0 | -3.0477717082 | -2.2793583395 | -1.3059974083 |
|             |            | H | 1.0 | -1.6903976437 | -3.3348176278 | -1.6129780203 |
|             |            | C | 6.0 | 0.5737195138  | 0.4083056013  | -1.1825310995 |
|             |            | H | 1.0 | 1.9268579450  | 1.6644090007  | -0.8987331571 |
|             |            | C | 6.0 | -2.0031275127 | -2.4563934206 | -1.0326554247 |
|             |            | C | 6.0 | -0.2045739371 | -0.6828049036 | -0.6866853812 |
|             |            | H | 1.0 | -1.5603587180 | -5.3652284504 | -0.7327327530 |
|             |            | O | 8.0 | 1.4929859001  | 0.9306241008  | -0.3695233790 |
|             |            | C | 6.0 | -1.6905177546 | -5.3497561493 | 0.3528907379  |
|             |            | C | 6.0 | -1.9274137094 | -2.7482341403 | 0.4727983184  |
|             |            | H | 1.0 | -3.5008969977 | -4.1887942388 | 0.3370985531  |
|             |            | H | 1.0 | -2.2106065952 | -6.2662058198 | 0.6440901134  |
|             |            | H | 1.0 | -0.7056762816 | -5.3642037870 | 0.8284237149  |
|             |            | C | 6.0 | 0.0277300639  | -1.1413020643 | 0.7420800811  |
|             |            | H | 1.0 | 0.1762409649  | -3.2435525604 | 0.4028863703  |
|             |            | C | 6.0 | -2.5068242618 | -4.1493521566 | 0.8165112520  |
|             |            | H | 1.0 | 1.0894155952  | -1.0648268393 | 0.9780890958  |

|            |            |   |     |               |               |               |
|------------|------------|---|-----|---------------|---------------|---------------|
|            |            | C | 6.0 | -0.4836834696 | -2.5694167947 | 0.9617822613  |
|            |            | O | 8.0 | -2.8092960078 | -1.8541116162 | 1.1803633223  |
|            |            | H | 1.0 | -2.3131130269 | -1.0432339390 | 1.3897574098  |
|            |            | O | 8.0 | -0.6841826001 | -0.1681608355 | 1.5668771544  |
|            |            | H | 1.0 | -0.4182916194 | -2.8549058267 | 2.0133463574  |
|            |            | O | 8.0 | -2.6452395411 | -4.2574768958 | 2.2263278136  |
|            |            | H | 1.0 | -3.0286727556 | -3.4039368666 | 2.4883532474  |
|            |            | O | 8.0 | 1.2322390815  | 0.2960762363  | 2.7582949712  |
|            |            | C | 6.0 | -0.1740005390 | 0.2020696039  | 2.8385546709  |
|            |            | H | 1.0 | -0.6141983615 | 1.1969192938  | 2.9984851793  |
|            |            | H | 1.0 | -0.1754138910 | -1.7384914365 | 3.7541441453  |
|            |            | C | 6.0 | -0.5795913822 | -0.7460876458 | 3.9725312995  |
|            |            | H | 1.0 | 2.0122433822  | 2.8362800784  | 3.1279673462  |
|            |            | H | 1.0 | -1.6693465049 | -0.8299888948 | 4.0304960241  |
|            |            | H | 1.0 | 2.9479687251  | 0.6688005344  | 3.7187113877  |
|            |            | C | 6.0 | 1.8853680553  | 0.8391636035  | 3.9186091853  |
|            |            | C | 6.0 | 1.6876328650  | 2.3508356512  | 4.0522426910  |
|            |            | H | 1.0 | 1.9832822561  | -0.9932126920 | 4.9999258876  |
|            |            | H | 1.0 | 0.6516615290  | 2.6378615176  | 4.2438576025  |
|            |            | C | 6.0 | 1.5115259919  | -0.0094425904 | 5.1521099648  |
|            |            | C | 6.0 | -0.0098157157 | -0.2623262602 | 5.3162814046  |
|            |            | H | 1.0 | -0.9971703994 | 1.5442104240  | 5.1430542634  |
|            |            | H | 1.0 | 2.2921431872  | 2.7244092559  | 4.8817943221  |
|            |            | H | 1.0 | -0.1093982598 | -1.0859222612 | 6.0401561991  |
|            |            | N | 7.0 | -0.7810759141 | 0.8585393416  | 5.8605396143  |
|            |            | O | 8.0 | 2.0666321136  | 0.6314778946  | 6.3003814813  |
|            |            | H | 1.0 | -0.2102456224 | 1.3387208108  | 6.5536369718  |
|            |            | H | 1.0 | 2.0650849795  | -0.0064124775 | 7.0265637234  |
| Epirubicin | 56390-09-1 | H | 1.0 | -3.3120034484 | 6.0982230793  | -0.2678702510 |
|            |            | H | 1.0 | -4.0548126334 | 4.4719316284  | -1.7824460597 |
|            |            | O | 8.0 | -3.0298982986 | 5.1905260988  | -0.0996230400 |
|            |            | H | 1.0 | 7.5967452923  | -0.9814068507 | -2.5939975760 |
|            |            | C | 6.0 | -3.0519237991 | 4.4672825374  | -1.3294741628 |
|            |            | H | 1.0 | -2.3526098266 | 4.8889232816  | -2.0615135912 |
|            |            | O | 8.0 | -2.3491445559 | 2.3625155021  | -2.1273718593 |
|            |            | H | 1.0 | 8.0175481825  | 0.2929446076  | -0.7580501206 |
|            |            | H | 1.0 | 8.0397752523  | 2.3764622519  | 0.5355792603  |
|            |            | C | 6.0 | 7.0780634896  | 0.7294263050  | -0.4445922679 |
|            |            | C | 6.0 | 7.0893921974  | 1.9120819932  | 0.2900632150  |
|            |            | C | 6.0 | 7.0335373703  | -1.6438263753 | -1.9255098085 |
|            |            | C | 6.0 | -2.6686319867 | 2.9933695646  | -1.1387672864 |
|            |            | H | 1.0 | 6.7341646763  | -2.5376845825 | -2.4729524756 |
|            |            | O | 8.0 | 5.8205592058  | -1.0430704113 | -1.4907262429 |

|   |     |               |               |               |
|---|-----|---------------|---------------|---------------|
| H | 1.0 | 5.8801275170  | 3.4144954937  | 1.2774566674  |
| C | 6.0 | 5.8667200286  | 0.1031506722  | -0.7801260521 |
| C | 6.0 | 5.8991647005  | 2.4948656978  | 0.7057697562  |
| H | 1.0 | 7.6686549110  | -1.9330987212 | -1.0793886980 |
| C | 6.0 | 4.6843063245  | 1.8857015750  | 0.3828628641  |
| C | 6.0 | 4.6337611945  | 0.6826603480  | -0.3632841384 |
| H | 1.0 | 1.6782240737  | -1.2146705745 | -1.4415363195 |
| C | 6.0 | 3.4419632899  | 2.5555862624  | 0.8521593447  |
| H | 1.0 | -1.3432676573 | 3.7928806383  | 1.1087600816  |
| C | 6.0 | 3.3191274185  | 0.0729461887  | -0.6876821527 |
| O | 8.0 | 0.7355619516  | -0.9566704525 | -1.2062682294 |
| O | 8.0 | 3.5192081235  | 3.6259047743  | 1.4969180480  |
| C | 6.0 | 2.1636166409  | 1.9433825910  | 0.5440613563  |
| C | 6.0 | 2.1036596171  | 0.7308324488  | -0.1997282756 |
| H | 1.0 | -5.8972088174 | -1.6396220905 | -0.7782383257 |
| H | 1.0 | -3.8655258383 | 3.8100454045  | 0.9677970015  |
| H | 1.0 | 1.9507833952  | 3.9610438363  | 1.7570228131  |
| C | 6.0 | 0.8487607402  | 0.1597549536  | -0.4804367986 |
| C | 6.0 | 0.9773301903  | 2.5661849257  | 0.9663407798  |
| C | 6.0 | -2.7746070228 | 2.3655626212  | 0.2667985178  |
| O | 8.0 | 0.9872780487  | 3.7167126848  | 1.6517918225  |
| O | 8.0 | 3.2328217829  | -0.9773744333 | -1.3606756747 |
| H | 1.0 | -1.7436341250 | -0.0136144583 | -1.4128632213 |
| C | 6.0 | -0.2890153979 | 1.9809629388  | 0.6737947467  |
| C | 6.0 | -1.5320413184 | 2.7167210375  | 1.1137387330  |
| C | 6.0 | -0.3525271992 | 0.7785141632  | -0.0121249228 |
| O | 8.0 | -3.9655110066 | 2.8466995030  | 0.8845248499  |
| H | 1.0 | -3.7808914306 | 0.5687449495  | -0.3992174239 |
| C | 6.0 | -1.6748898438 | 0.0943572838  | -0.3262560709 |
| C | 6.0 | -5.6537433706 | -2.6150384561 | -0.3477362255 |
| C | 6.0 | -2.9088853058 | 0.8442833056  | 0.1982144293  |
| H | 1.0 | -6.3647765504 | -2.8416599264 | 0.4500694320  |
| H | 1.0 | -5.7525057999 | -3.3710802677 | -1.1335251875 |
| H | 1.0 | -1.7834356289 | 2.4541714497  | 2.1502827700  |
| O | 8.0 | -3.3551619945 | -2.3334447109 | -0.8937489986 |
| H | 1.0 | -4.1409597238 | -1.8271603919 | 0.9690343422  |
| C | 6.0 | -4.2396325374 | -2.6137493280 | 0.2086390039  |
| H | 1.0 | -3.0946155776 | 0.5107289694  | 1.2238181157  |
| O | 8.0 | -1.6467896769 | -1.2124682043 | 0.2779094652  |
| H | 1.0 | -1.4763991715 | -2.1533644197 | -1.5455433513 |
| C | 6.0 | -1.9736722937 | -2.2891416793 | -0.5801802051 |
| C | 6.0 | -3.8531499955 | -3.9443387173 | 0.8640265676  |
| H | 1.0 | -3.9677859677 | -4.7422848263 | 0.1042315022  |
| O | 8.0 | -4.7018500982 | -4.1809715701 | 1.9715655852  |

|            |            |   |     |               |               |               |
|------------|------------|---|-----|---------------|---------------|---------------|
|            |            | C | 6.0 | -1.4975058713 | -3.5719555836 | 0.1077561427  |
|            |            | H | 1.0 | -2.2932604521 | -3.1142158694 | 2.0570262604  |
|            |            | H | 1.0 | -1.5476385384 | -4.3876361561 | -0.6253195868 |
|            |            | C | 6.0 | -2.3861308070 | -3.9110740234 | 1.3099445941  |
|            |            | H | 1.0 | -4.2066671390 | -4.8170978389 | 2.5163889291  |
|            |            | H | 1.0 | -0.4507243746 | -3.4482178898 | 0.4020191861  |
|            |            | N | 7.0 | -2.0950314996 | -5.1764943171 | 2.0017356842  |
|            |            | H | 1.0 | -1.9707513499 | -5.9243892944 | 1.3204862725  |
|            |            | H | 1.0 | -1.2223592081 | -5.1082414730 | 2.5189152964  |
|            |            | H | 1.0 | 3.0327740592  | 2.1307010399  | -5.7351560118 |
|            |            | O | 8.0 | 2.7259396543  | 1.4572556843  | -5.1156759517 |
|            |            | H | 1.0 | 3.0638846522  | 2.7164773055  | -3.4677290139 |
|            |            | H | 1.0 | -0.3365135733 | 6.5431523830  | -1.1968339316 |
|            |            | C | 6.0 | 3.3215974909  | 1.7233462316  | -3.8689827897 |
|            |            | H | 1.0 | 4.4232046261  | 1.6942183237  | -3.9050368826 |
|            |            | H | 1.0 | -2.8158594142 | 3.5620784578  | 0.7094226373  |
|            |            | H | 1.0 | -1.5532945054 | 2.2542275170  | -0.8834999692 |
|            |            | O | 8.0 | -0.5055723942 | 3.9494073484  | -0.7464121650 |
|            |            | H | 1.0 | 1.1908713143  | 5.7346156862  | -1.5890400342 |
|            |            | H | 1.0 | -1.6339530927 | 5.8372301569  | 0.8955147920  |
|            |            | C | 6.0 | 0.5521746042  | 6.0705459548  | -0.7670792101 |
|            |            | C | 6.0 | -0.9936170978 | 2.7829853913  | -0.1060331179 |
|            |            | H | 1.0 | 0.2561400447  | 1.3408082560  | -1.6052074663 |
|            |            | C | 6.0 | -1.8951778758 | 3.1014288434  | 1.0846955623  |
|            |            | C | 6.0 | 2.8712181196  | 0.6627167378  | -2.8664496708 |
|            |            | O | 8.0 | 2.2673346083  | -0.3314644366 | -3.2075245488 |
|            |            | C | 6.0 | 0.1536440284  | 4.8968638135  | 0.1162051878  |
|            |            | H | 1.0 | 2.1180833999  | 2.8059830705  | -1.2643712607 |
|            |            | H | 1.0 | 1.0995141792  | 6.8198860373  | -0.1865650392 |
|            |            | H | 1.0 | -2.1642400313 | 2.1596981466  | 1.5736799780  |
|            |            | C | 6.0 | -0.7561470994 | 5.3022710183  | 1.2794169367  |
|            |            | H | 1.0 | -2.3199053210 | -0.8454300516 | -0.0138941504 |
|            |            | C | 6.0 | 0.7793124277  | 1.2341940338  | -0.6453292043 |
|            |            | C | 6.0 | -1.2323015201 | 4.0745829518  | 2.0630396664  |
|            |            | O | 8.0 | 0.0594208743  | 1.9557133733  | 0.3628490105  |
|            |            | C | 6.0 | 2.1816624136  | 1.8492061881  | -0.7395399345 |
|            |            | N | 7.0 | -2.2066001360 | 4.4819107651  | 3.0841009232  |
|            |            | H | 1.0 | -0.2131547337 | 5.9936411335  | 1.9379527135  |
|            |            | H | 1.0 | 1.0591984537  | 4.4243627231  | 0.5251389893  |
|            |            | O | 8.0 | 4.4661916683  | 1.6620328648  | -1.3244633415 |
|            |            | C | 6.0 | 3.2300825612  | 0.9367590099  | -1.3862512232 |
|            |            | H | 1.0 | 5.1837684648  | 1.0413118897  | -1.5151458435 |
|            |            | O | 8.0 | -1.5744427686 | -0.2021837254 | -0.2192128382 |
| Esorubicin | 63950-06-1 |   |     |               |               |               |



|                            |            |   |     |               |               |               |
|----------------------------|------------|---|-----|---------------|---------------|---------------|
|                            |            | H | 1.0 | -2.5110058558 | 3.6625650951  | 3.6073887131  |
|                            |            | H | 1.0 | -1.7528306629 | 5.0926735581  | 3.7616158761  |
|                            |            | C | 6.0 | 0.7970728181  | -0.2434888571 | -0.2794441715 |
|                            |            | H | 1.0 | -0.3449710005 | 3.5760265314  | 2.4907915164  |
|                            |            | H | 1.0 | 2.5300135974  | 2.0596505802  | 0.2771183177  |
|                            |            | C | 6.0 | -0.4493844769 | -0.9019275285 | -0.0424538513 |
|                            |            | H | 1.0 | 3.9068292004  | -1.1155546284 | -1.1112668131 |
|                            |            | C | 6.0 | 3.3197397314  | -0.3621790929 | -0.5757817886 |
|                            |            | H | 1.0 | -6.1500756769 | -4.2868676869 | 1.3355893705  |
|                            |            | C | 6.0 | 1.9789707335  | -0.9639378073 | -0.2256961400 |
|                            |            | H | 1.0 | -5.5277924804 | -5.8789851926 | 0.8263258574  |
|                            |            | O | 8.0 | -2.8312789952 | -2.2602527089 | 0.4434477913  |
|                            |            | C | 6.0 | -0.4797978802 | -2.2566046987 | 0.3383434110  |
|                            |            | O | 8.0 | -4.1470156950 | -4.3562239542 | 1.2130082300  |
|                            |            | C | 6.0 | -5.3671994976 | -5.0276193338 | 1.4987808655  |
|                            |            | C | 6.0 | -1.7698164955 | -2.9041730952 | 0.5920687865  |
|                            |            | H | 1.0 | 3.8725062745  | -0.1319151801 | 0.3444623349  |
|                            |            | C | 6.0 | 1.9594912548  | -2.3337547792 | 0.1627561405  |
|                            |            | C | 6.0 | 0.7444430275  | -2.9722695387 | 0.4566354559  |
|                            |            | H | 1.0 | 2.9180620729  | -3.9061239412 | 0.5188836678  |
|                            |            | C | 6.0 | -2.9805130597 | -5.0253996858 | 1.3227897421  |
|                            |            | C | 6.0 | -1.7763879669 | -4.3249603520 | 1.0245625899  |
|                            |            | H | 1.0 | -5.4056435581 | -5.3731363917 | 2.5390664612  |
|                            |            | O | 8.0 | 3.1350307226  | -2.9716035896 | 0.2387192687  |
|                            |            | H | 1.0 | -3.8341830481 | -6.9076578633 | 1.9473642947  |
|                            |            | C | 6.0 | -2.9220909301 | -6.3714465841 | 1.7193671521  |
|                            |            | C | 6.0 | -0.5526100878 | -5.0282207090 | 1.1442874564  |
|                            |            | C | 6.0 | 0.7474858958  | -4.3685033360 | 0.8510621202  |
|                            |            | C | 6.0 | -1.7006973608 | -7.0313843793 | 1.8242626763  |
|                            |            | C | 6.0 | -0.5144976615 | -6.3676350309 | 1.5387306362  |
|                            |            | O | 8.0 | 1.8116579709  | -5.0198542956 | 0.9491181566  |
|                            |            | H | 1.0 | -1.6836337613 | -8.0726505213 | 2.1319421983  |
|                            |            | H | 1.0 | 0.4487959849  | -6.8572763698 | 1.6114923956  |
| 11-Hydroxy aclacinomycin A | NSC 670121 | H | 1.0 | -7.9779550316 | -7.1198213142 | -0.0107488774 |
|                            |            | H | 1.0 | -6.5460451080 | -6.1745483199 | -1.7503395328 |
|                            |            | H | 1.0 | -7.5423389873 | -8.4819939777 | -1.0305030955 |
|                            |            | H | 1.0 | -5.3251666367 | -7.4365912020 | -1.5385019289 |
|                            |            | H | 1.0 | -5.5875274875 | -2.5711826668 | -1.8265554746 |
|                            |            | C | 6.0 | -7.1296640081 | -7.7356911850 | -0.3469171170 |
|                            |            | H | 1.0 | -4.8081887536 | -3.9179318064 | -2.6879517291 |
|                            |            | C | 6.0 | -6.0773794005 | -6.8368892570 | -1.0160119702 |
|                            |            | H | 1.0 | -4.3107091300 | -2.2444075901 | -3.0119056488 |
|                            |            | C | 6.0 | -4.6403701811 | -2.9382575412 | -2.2360693609 |

|   |     |               |               |               |
|---|-----|---------------|---------------|---------------|
| H | 1.0 | -2.9855028481 | -0.1742593712 | -3.4824231664 |
| O | 8.0 | -7.0618890492 | -9.5324854075 | 1.2515702624  |
| C | 6.0 | -6.6228104081 | -8.4570438420 | 0.8957175763  |
| H | 1.0 | -3.5055263938 | 1.3496059103  | -1.9708107919 |
| H | 1.0 | -6.0460056643 | -5.3591312079 | 0.5857900436  |
| C | 6.0 | -5.3473361663 | -6.0078716859 | 0.0311488729  |
| O | 8.0 | -4.3602340540 | -5.2499810809 | -0.5780185712 |
| H | 1.0 | -4.8850160000 | -3.5608340547 | 0.5151978334  |
| C | 6.0 | -3.5924627495 | -3.0351394276 | -1.1373135905 |
| H | 1.0 | -6.9896745396 | -6.2315083497 | 2.5348186477  |
| C | 6.0 | -1.9824027703 | -0.3645822065 | -3.0912089784 |
| H | 1.0 | -1.7786976912 | -1.4270057316 | -3.2294779664 |
| H | 1.0 | -1.2680348164 | 0.2242411347  | -3.6981507823 |
| H | 1.0 | -3.4129517810 | -2.0418398030 | -0.7066322122 |
| C | 6.0 | -4.0039755102 | -3.9781646392 | 0.0059185039  |
| C | 6.0 | -2.5277953378 | 1.3195083183  | -1.4822215561 |
| C | 6.0 | -5.5779880814 | -7.7276452432 | 1.7518296165  |
| O | 8.0 | -2.3753055858 | -3.4819417130 | -1.7662620690 |
| O | 8.0 | -4.7055694941 | -6.9112735466 | 0.9538456678  |
| H | 1.0 | -1.9117058022 | 2.1325339924  | -1.9121415723 |
| C | 6.0 | -6.2408031524 | -6.9437405824 | 2.8950863533  |
| H | 1.0 | -6.7369965486 | -7.6387027787 | 3.5775012858  |
| N | 7.0 | -1.9494897177 | -0.0112636825 | -1.6701590759 |
| H | 1.0 | -2.6878292135 | 1.5345011102  | -0.4242121188 |
| H | 1.0 | -4.9290855193 | -8.4969566855 | 2.1792329511  |
| H | 1.0 | -5.4760716831 | -6.3853217735 | 3.4413713639  |
| C | 6.0 | -2.8501861309 | -4.1151448781 | 1.0126081123  |
| H | 1.0 | -3.4679498829 | -5.7881177852 | 1.7827787751  |
| C | 6.0 | -1.2710355766 | -3.6485746630 | -0.8961199088 |
| H | 1.0 | -1.7772901036 | -5.5894948460 | -0.1363398051 |
| H | 1.0 | -2.6612849029 | -3.1146408610 | 1.4176328228  |
| H | 1.0 | -0.0352800849 | -1.9460613246 | -2.1939966488 |
| O | 8.0 | -3.1702410811 | -4.9259125341 | 2.1254041288  |
| H | 1.0 | -0.4900972552 | -4.0719044317 | -1.5393969428 |
| C | 6.0 | -0.5882820421 | -0.1264654858 | -1.1218781791 |
| C | 6.0 | -1.5968206633 | -4.5876335017 | 0.2668967574  |
| H | 1.0 | 0.1049781587  | 0.4826710841  | -1.7370793922 |
| O | 8.0 | -0.8277902478 | -2.4254915764 | -0.3339591202 |
| C | 6.0 | -0.0382965058 | -1.5714757059 | -1.1639237137 |
| H | 1.0 | -0.7683779134 | 1.4041581942  | 0.4412119695  |
| H | 1.0 | -1.1413477243 | -0.2519123102 | 0.9562473074  |
| C | 6.0 | -0.4814322734 | 0.3574565818  | 0.3321102200  |
| H | 1.0 | -0.7497331323 | -4.6358200604 | 0.9555533442  |
| C | 6.0 | 1.4216985107  | -1.5588902346 | -0.6662831085 |

|   |     |               |               |               |
|---|-----|---------------|---------------|---------------|
| H | 1.0 | 1.9941910162  | -0.9035737930 | -1.3388182699 |
| H | 1.0 | 2.0821120541  | -3.3860184384 | -1.6236560000 |
| C | 6.0 | 0.9442234206  | 0.2303508336  | 0.8692046345  |
| H | 1.0 | 2.5639318356  | 1.4422457320  | -1.4317743977 |
| H | 1.0 | -0.4264439901 | 10.2031166130 | 3.7407377840  |
| H | 1.0 | 1.5285605043  | -3.5887095667 | 0.0588320099  |
| O | 8.0 | -0.5784477957 | 7.6783983798  | 4.0710287873  |
| C | 6.0 | 2.0704794524  | -2.9335238536 | -0.6270853521 |
| C | 6.0 | 0.2570791545  | 9.6524178566  | 3.1036681035  |
| O | 8.0 | 1.7220138681  | 1.2638163286  | 0.2595032803  |
| H | 1.0 | 1.0918106691  | 11.3799736830 | 2.1554526636  |
| H | 1.0 | -0.4388962457 | 6.7003433080  | 4.0039885405  |
| C | 6.0 | 0.2611769608  | 8.2484866784  | 3.1996153275  |
| O | 8.0 | 3.3776350987  | 1.4123872013  | -1.9624671592 |
| O | 8.0 | 1.5072798319  | -1.0428360675 | 0.6753908170  |
| C | 6.0 | 1.1070194200  | 10.2960091021 | 2.2173763394  |
| H | 1.0 | 0.9591225920  | 0.3862870611  | 1.9532138977  |
| O | 8.0 | 0.3859430374  | 5.4338351837  | 3.2737763127  |
| C | 6.0 | 1.1427851971  | 7.4944171008  | 2.3811689937  |
| C | 6.0 | 1.9837079978  | 9.5677204551  | 1.4028375309  |
| C | 6.0 | 1.1594831605  | 6.0371581250  | 2.4665612167  |
| H | 1.0 | 2.6530111952  | 10.0589000292 | 0.7067798013  |
| C | 6.0 | 2.0024519792  | 8.1796398054  | 1.4827514409  |
| H | 1.0 | 0.7734834540  | 3.8546720655  | 3.0121858442  |
| H | 1.0 | 4.5147152715  | -0.7129412677 | -2.7936878649 |
| O | 8.0 | 1.3156150654  | 3.1865980348  | 2.5133078848  |
| C | 6.0 | 2.0701635075  | 5.2866068515  | 1.6183724242  |
| C | 6.0 | 2.9358682310  | 7.4195391529  | 0.6160152001  |
| C | 6.0 | 2.1027667241  | 3.8843142089  | 1.6837191250  |
| H | 1.0 | 3.1027002899  | -2.8511418297 | -0.2769249722 |
| C | 6.0 | 2.9390117475  | 5.9644077492  | 0.7106585885  |
| O | 8.0 | 3.6962842659  | 8.0223972200  | -0.1726625398 |
| H | 1.0 | 4.7635657082  | 3.4961085234  | -1.9295251600 |
| C | 6.0 | 3.0013475606  | 3.1444644779  | 0.8588382350  |
| C | 6.0 | 3.8149445879  | 5.2234106464  | -0.0969842777 |
| C | 6.0 | 2.9484620250  | 1.6342158841  | 0.9405079700  |
| C | 6.0 | 3.8382193842  | 3.7961564416  | -0.0273011449 |
| O | 8.0 | 4.6590420037  | 5.8089924812  | -0.9515265330 |
| C | 6.0 | 4.4939258240  | 1.5343252359  | -1.0779143130 |
| H | 1.0 | 4.4998437639  | 6.7930702017  | -0.8639272026 |
| C | 6.0 | 5.3846014220  | -0.6515933801 | -2.1363199318 |
| C | 6.0 | 4.8186826697  | 3.0647354898  | -0.9277016911 |
| H | 1.0 | 5.9319284463  | 1.3647183544  | -2.6622778137 |
| H | 1.0 | 2.8605849231  | 1.3333658966  | 1.9899238525  |

|                            |            |   |     |               |               |               |
|----------------------------|------------|---|-----|---------------|---------------|---------------|
|                            |            | H | 1.0 | 3.9817835660  | -0.1104672270 | 0.2636056629  |
|                            |            | C | 6.0 | 4.1705329344  | 0.9635807217  | 0.3122717535  |
|                            |            | C | 6.0 | 5.6699471628  | 0.8039772176  | -1.7577412871 |
|                            |            | H | 1.0 | 5.1946798799  | -1.2778981102 | -1.2585648613 |
|                            |            | H | 1.0 | 6.2440688761  | -1.0802571263 | -2.6612601061 |
|                            |            | H | 1.0 | 5.0307939831  | 1.1305913502  | 0.9693633847  |
|                            |            | H | 1.0 | 6.5438203295  | 0.8485924813  | -1.0974254555 |
|                            |            | C | 6.0 | 6.2354946841  | 3.3036534027  | -0.4023952067 |
|                            |            | O | 8.0 | 7.0818132449  | 3.6353998439  | -1.3955366093 |
|                            |            | O | 8.0 | 6.5743969411  | 3.1832611994  | 0.7575322755  |
|                            |            | H | 1.0 | 8.9798087674  | 4.1194743538  | -1.9058056255 |
|                            |            | C | 6.0 | 8.4456316479  | 3.8536301901  | -0.9942750870 |
|                            |            | H | 1.0 | 8.5031817623  | 4.6639564325  | -0.2640940993 |
|                            |            | H | 1.0 | 8.8671393101  | 2.9478103000  | -0.5514186432 |
| 11-Hydroxy aclacinomycin X | NSC 670122 | H | 1.0 | -7.4335322131 | -6.3091678388 | -2.4150155867 |
|                            |            | H | 1.0 | -7.5223080116 | -8.4219178730 | -1.0421682531 |
|                            |            | N | 7.0 | -6.8461891731 | -5.8805887293 | -1.7152856445 |
|                            |            | H | 1.0 | -6.2577503804 | -5.1178103990 | -2.0182046502 |
|                            |            | C | 6.0 | -6.7783343751 | -7.9229315128 | -0.4272861058 |
|                            |            | C | 6.0 | -6.3593832606 | -6.6590430042 | -0.7133651377 |
|                            |            | H | 1.0 | -5.7331995244 | -2.5282151593 | -1.8028726267 |
|                            |            | H | 1.0 | -4.8295405185 | -3.7204571701 | -2.7814951648 |
|                            |            | O | 8.0 | -6.7056463174 | -9.7410369831 | 1.0853373638  |
|                            |            | H | 1.0 | -4.4645747340 | -1.9989407972 | -2.9211428338 |
|                            |            | C | 6.0 | -4.7541078186 | -2.7847221250 | -2.2208537490 |
|                            |            | C | 6.0 | -6.2915071545 | -8.6407726279 | 0.7309595845  |
|                            |            | C | 6.0 | -5.3676159170 | -5.9533751780 | 0.2061693813  |
|                            |            | H | 1.0 | -5.9266694954 | -5.3679513253 | 0.9555486555  |
|                            |            | H | 1.0 | -3.0263422774 | -0.0847618483 | -3.5150208438 |
|                            |            | O | 8.0 | -4.5638734594 | -5.1044951595 | -0.5562027539 |
|                            |            | H | 1.0 | -6.5906056726 | -6.7491615581 | 2.7810195146  |
|                            |            | H | 1.0 | -4.9968788021 | -3.4038602563 | 0.5551637602  |
|                            |            | H | 1.0 | -3.5442712580 | 1.4395860761  | -2.0037717456 |
|                            |            | C | 6.0 | -3.7126732186 | -2.9205979207 | -1.1185878535 |
|                            |            | C | 6.0 | -5.2125505169 | -7.9530602004 | 1.5789625804  |
|                            |            | O | 8.0 | -4.5340571432 | -6.9049430612 | 0.8501209463  |
|                            |            | H | 1.0 | -6.1863604510 | -8.3324398002 | 3.4541105894  |
|                            |            | C | 6.0 | -4.1403218911 | -3.8510799602 | 0.0295259726  |
|                            |            | C | 6.0 | -5.7795606365 | -7.4717218380 | 2.9177661930  |
|                            |            | C | 6.0 | -2.0322662250 | -0.2957603815 | -3.1112877665 |
|                            |            | H | 1.0 | -1.8480760208 | -1.3621197187 | -3.2473678405 |
|                            |            | H | 1.0 | -3.5097712571 | -1.9335843092 | -0.6838243440 |
|                            |            | O | 8.0 | -2.5124797056 | -3.3904474952 | -1.7588736814 |

|   |     |               |               |               |
|---|-----|---------------|---------------|---------------|
| H | 1.0 | -1.2995337354 | 0.2784450480  | -3.7099477190 |
| H | 1.0 | -4.4328357573 | -8.6972161769 | 1.7624129961  |
| C | 6.0 | -2.5706782074 | 1.3965061439  | -1.5079150967 |
| N | 7.0 | -2.0092060374 | 0.0571823330  | -1.6897000535 |
| H | 1.0 | -1.9401137744 | 2.2000190137  | -1.9341677963 |
| H | 1.0 | -4.9983188274 | -7.0057169852 | 3.5241380077  |
| H | 1.0 | -2.7354803854 | 1.6149124631  | -0.4514099143 |
| H | 1.0 | -3.4912550270 | -5.7109171327 | 1.8146038710  |
| C | 6.0 | -2.9724834491 | -4.0185698098 | 1.0176059445  |
| H | 1.0 | -1.9465775004 | -5.5144265061 | -0.1489123113 |
| C | 6.0 | -1.4013234465 | -3.5802939838 | -0.8992325994 |
| O | 8.0 | -3.2967078120 | -4.8130382524 | 2.1400106747  |
| H | 1.0 | -0.6350358341 | -4.0151107279 | -1.5522406753 |
| H | 1.0 | -2.7573349797 | -3.0198083987 | 1.4139704882  |
| C | 6.0 | -1.7390454377 | -4.5197031279 | 0.2590570074  |
| H | 1.0 | -0.1189131533 | -1.9074082426 | -2.1913699027 |
| C | 6.0 | -0.6538109063 | -0.0757659100 | -1.1295152421 |
| O | 8.0 | -0.9348082418 | -2.3689524260 | -0.3364494285 |
| H | 1.0 | 0.0529229846  | 0.5206961240  | -1.7415029679 |
| C | 6.0 | -0.1255263831 | -1.5286927380 | -1.1627953811 |
| H | 1.0 | -1.2281453097 | -0.1799631937 | 0.9446907980  |
| H | 1.0 | -0.8882541289 | -4.5920033924 | 0.9410209940  |
| H | 1.0 | -0.8181747595 | 1.4654690298  | 0.4242567450  |
| C | 6.0 | -0.5507946057 | 0.4128112146  | 0.3231916765  |
| H | 1.0 | 1.9687077241  | -3.3762686305 | -1.6021998421 |
| C | 6.0 | 1.3292887221  | -1.5387190623 | -0.6506991351 |
| H | 1.0 | 1.9187998103  | -0.8927401068 | -1.3174478877 |
| H | 1.0 | 1.3977967418  | -3.5700632157 | 0.0756150652  |
| C | 6.0 | 1.9555755799  | -2.9234991698 | -0.6057494994 |
| C | 6.0 | 0.8672094083  | 0.2613905058  | 0.8749690034  |
| H | 1.0 | 2.5451698308  | 1.4300803820  | -1.4098924422 |
| O | 8.0 | 1.4076761993  | -1.0235663999 | 0.6912892954  |
| O | 8.0 | 1.6702817750  | 1.2772187445  | 0.2703914665  |
| O | 8.0 | 3.3664885428  | 1.3802321793  | -1.9269334039 |
| H | 1.0 | 0.8721487672  | 0.4206090904  | 1.9585409952  |
| H | 1.0 | 4.4645922871  | -0.7829314508 | -2.7142772869 |
| H | 1.0 | 2.9858914280  | -2.8574912976 | -0.2469034232 |
| O | 8.0 | -0.5755529985 | 7.7715905828  | 3.9653940066  |
| H | 1.0 | -0.4539505114 | 6.7903436577  | 3.9116105848  |
| H | 1.0 | -0.3636908384 | 10.2901864553 | 3.6180870636  |
| O | 8.0 | 0.3636952804  | 5.5012155057  | 3.2121134858  |
| C | 6.0 | 0.2959140647  | 8.3167772069  | 3.1096570260  |
| H | 1.0 | 0.7237110053  | 3.9145202430  | 2.9731384419  |
| C | 6.0 | 0.3226004244  | 9.7196373968  | 3.0018317862  |

|                         |            |   |     |              |               |               |
|-------------------------|------------|---|-----|--------------|---------------|---------------|
|                         |            | O | 8.0 | 1.2613057608 | 3.2298775299  | 2.4911647605  |
|                         |            | C | 6.0 | 1.1660540397 | 6.0818688765  | 2.4163549162  |
|                         |            | C | 6.0 | 1.1808589982 | 7.5380841054  | 2.3184040785  |
|                         |            | C | 6.0 | 1.2055381038 | 10.3380153661 | 2.1300138888  |
|                         |            | H | 1.0 | 1.2134752906 | 11.4214771245 | 2.0587539833  |
|                         |            | C | 6.0 | 2.0797424889 | 3.9031078277  | 1.6717294439  |
|                         |            | C | 6.0 | 2.0782185414 | 5.3052348350  | 1.5936009597  |
|                         |            | C | 6.0 | 2.0745754759 | 8.1977924755  | 1.4341129577  |
|                         |            | C | 6.0 | 2.8945351247 | 1.6296200747  | 0.9659602628  |
|                         |            | C | 6.0 | 2.0856208399 | 9.5851335788  | 1.3417839913  |
|                         |            | H | 1.0 | 4.8078029972 | 3.4305720909  | -1.8826434723 |
|                         |            | C | 6.0 | 2.9785577718 | 3.1376924272  | 0.8707858083  |
|                         |            | C | 6.0 | 4.4710176163 | 1.4816100160  | -1.0246595679 |
|                         |            | C | 6.0 | 5.3310926472 | -0.7318756257 | -2.0515232008 |
|                         |            | C | 6.0 | 2.9781320913 | 5.9568801302  | 0.6973527515  |
|                         |            | H | 1.0 | 2.7804054715 | 10.0568088142 | 0.6572848365  |
|                         |            | C | 6.0 | 3.0105597336 | 7.4113267847  | 0.5941856534  |
|                         |            | H | 1.0 | 3.8988755696 | -0.1426921198 | 0.3177518672  |
|                         |            | C | 6.0 | 3.8461606950 | 3.7644006300  | -0.0039256160 |
|                         |            | C | 6.0 | 3.8535721129 | 5.1908357312  | -0.0870004733 |
|                         |            | O | 8.0 | 3.8024094498 | 7.9913609598  | -0.1804545617 |
|                         |            | H | 1.0 | 5.9239331781 | 1.2688912367  | -2.5886716332 |
|                         |            | H | 1.0 | 5.1248452201 | -1.3475309111 | -1.1699445301 |
|                         |            | H | 1.0 | 2.7844620992 | 1.3413953177  | 2.0168842061  |
|                         |            | H | 1.0 | 6.1858337869 | -1.1802423116 | -2.5676075003 |
|                         |            | O | 8.0 | 4.7269957572 | 5.7510638022  | -0.9290699105 |
|                         |            | C | 6.0 | 4.1115238558 | 0.9269948839  | 0.3628672235  |
|                         |            | C | 6.0 | 4.8290716045 | 3.0043293588  | -0.8774004029 |
|                         |            | C | 6.0 | 5.6405398014 | 0.7211878616  | -1.6826131866 |
|                         |            | H | 1.0 | 4.5884320603 | 6.7392223722  | -0.8512965871 |
|                         |            | H | 1.0 | 4.9637158423 | 1.0784206981  | 1.0339611261  |
|                         |            | H | 1.0 | 6.5071585375 | 0.7544851234  | -1.0122665656 |
|                         |            | C | 6.0 | 6.2388590414 | 3.2122924678  | -0.3205541761 |
|                         |            | O | 8.0 | 7.1146682432 | 3.5219307463  | -1.2949695126 |
|                         |            | O | 8.0 | 6.5484797775 | 3.0874925243  | 0.8470241283  |
|                         |            | H | 1.0 | 9.0336031923 | 3.9667322072  | -1.7614946361 |
|                         |            | C | 6.0 | 8.4736325416 | 3.7107531039  | -0.8627435028 |
|                         |            | H | 1.0 | 8.8655292364 | 2.7953112221  | -0.4125358279 |
|                         |            | H | 1.0 | 8.5322101714 | 4.5183524934  | -0.1296806430 |
| 3'-Hydroxy daunorubicin | 64842-75-7 | O | 8.0 | 5.3085405758 | -0.4244607283 | -2.6455138686 |
|                         |            | H | 1.0 | 0.3207910677 | 3.1088384775  | -3.6135895054 |
|                         |            | H | 1.0 | 2.1101550990 | 0.1387544274  | -3.5287899356 |
|                         |            | O | 8.0 | 0.9476209347 | 2.3563642811  | -3.4221832146 |

|   |     |               |               |               |
|---|-----|---------------|---------------|---------------|
| O | 8.0 | -0.8803383769 | 4.0985423667  | -3.1052573708 |
| H | 1.0 | 5.7241006836  | -2.6807828652 | -3.7093358879 |
| C | 6.0 | 4.4608093193  | -1.2981649411 | -2.6831910773 |
| O | 8.0 | 2.2328228258  | -2.1423283951 | -2.3537555254 |
| H | 1.0 | -2.6229274293 | 5.6655034936  | -2.6815106425 |
| C | 6.0 | 2.5188800217  | 0.2850110520  | -2.5244618857 |
| H | 1.0 | 3.9865847871  | -2.7853148539 | -4.1529905275 |
| C | 6.0 | 4.7003148656  | -2.6381750493 | -3.3361388505 |
| H | 1.0 | 3.3451963984  | 0.9990058228  | -2.6294199844 |
| C | 6.0 | 0.6919587643  | 1.9750111249  | -2.1655793728 |
| C | 6.0 | 3.0854716401  | -1.0560237127 | -2.0172148678 |
| H | 1.0 | 1.6167457593  | -2.2780033938 | -1.6137463007 |
| C | 6.0 | -1.0674074429 | 3.6942458458  | -1.9373550587 |
| C | 6.0 | -2.8414369487 | 5.3782598261  | -1.6603774990 |
| C | 6.0 | 1.4609499838  | 0.8951999937  | -1.6384875828 |
| H | 1.0 | -4.4030825932 | 6.8234675839  | -1.3470802475 |
| C | 6.0 | -0.2912229811 | 2.5991743476  | -1.3793423713 |
| H | 1.0 | -0.0688875660 | -5.4977546869 | -1.3762816888 |
| H | 1.0 | 4.5102756494  | -3.4495331722 | -2.6270606479 |
| C | 6.0 | -2.1062998877 | 4.3374911170  | -1.0889437323 |
| C | 6.0 | -3.8253205475 | 6.0133062273  | -0.9124877292 |
| C | 6.0 | 3.3071949907  | -0.9699141989 | -0.4924010255 |
| C | 6.0 | 1.2314808450  | 0.4736722461  | -0.3385946606 |
| H | 1.0 | 3.7488222845  | -1.9031133535 | -0.1255112095 |
| C | 6.0 | -0.7096523990 | -5.4635355841 | -0.4918534962 |
| C | 6.0 | -0.5219821166 | 2.1661236676  | -0.0433792556 |
| H | 1.0 | 4.0241682170  | -0.1687660212 | -0.2854761421 |
| O | 8.0 | 1.1070951010  | -1.8331633911 | 0.1786717096  |
| H | 1.0 | -1.7531168846 | -5.5399767799 | -0.8119924159 |
| H | 1.0 | -0.7661522650 | -3.3113846136 | -0.3718769296 |
| O | 8.0 | 0.9262469994  | -4.0852580853 | 0.5625031529  |
| C | 6.0 | -2.3385454451 | 3.9108745334  | 0.2422195344  |
| C | 6.0 | 1.9987111838  | -0.6891824148 | 0.2525020549  |
| H | 1.0 | -0.4841481290 | -6.3240395952 | 0.1425779577  |
| C | 6.0 | -4.0811142420 | 5.6200225523  | 0.3979541387  |
| H | 1.0 | 2.4043855282  | -2.9786217732 | 1.3258165600  |
| C | 6.0 | 0.2400781712  | 1.1031815295  | 0.4695136291  |
| C | 6.0 | -0.4923841750 | -4.1627725941 | 0.2630848779  |
| C | 6.0 | -1.5334003048 | 2.8008831016  | 0.8084953316  |
| C | 6.0 | 1.3273352636  | -2.8695382003 | 1.1474691545  |
| H | 1.0 | -4.8518934662 | 6.1281653678  | 0.9626048458  |
| C | 6.0 | -3.3516325613 | 4.5760862956  | 0.9908207371  |
| H | 1.0 | 2.2057228170  | -0.4727275628 | 1.3062703779  |
| O | 8.0 | 0.0807062271  | 0.6542579661  | 1.7209587992  |

|            |            |                                                 |
|------------|------------|-------------------------------------------------|
|            |            | H 1.0 -0.6453106336 1.2284821448 2.1163080471   |
|            |            | O 8.0 -1.6960982982 2.3994007029 1.9805801076   |
|            |            | O 8.0 -3.5723457360 4.1698086430 2.2570846441   |
|            |            | H 1.0 -0.0185268811 -5.3250796469 2.3616620054  |
|            |            | H 1.0 -5.5720113814 4.6927986350 2.5799288171   |
|            |            | C 6.0 -1.2688429674 -4.0610688149 1.5802101379  |
|            |            | C 6.0 0.5803279019 -2.5865958142 2.4541100803   |
|            |            | H 1.0 -1.3274118491 -1.9032095116 1.7115047585  |
|            |            | H 1.0 -2.3463938765 -4.1126952364 1.3899950602  |
|            |            | H 1.0 0.8095841709 -1.5836067985 2.8206301120   |
|            |            | C 6.0 -4.5797060859 4.8090083683 3.0320146190   |
|            |            | O 8.0 -0.9699305119 -5.1609006845 2.4495472600  |
|            |            | H 1.0 0.9373847752 -3.2999451819 3.2073901211   |
|            |            | C 6.0 -0.9422608649 -2.7421752284 2.3000109878  |
|            |            | H 1.0 -4.3649039823 5.8750324622 3.1735673106   |
|            |            | H 1.0 -4.5625723462 4.3058414537 3.9987152494   |
|            |            | O 8.0 -1.5954631524 -2.6957794148 3.5566313449  |
|            |            | H 1.0 -1.4889275079 -3.5869428432 3.9269710111  |
|            |            | H 1.0 -3.3185641390 -2.3943183395 -2.6224174392 |
|            |            | H 1.0 -4.7130329379 -1.6233631742 -2.2488108895 |
|            |            | N 7.0 -3.7822686808 -1.8447011608 -1.9030081909 |
|            |            | H 1.0 -4.3454746188 -3.6468575163 -0.8838363812 |
|            |            | C 6.0 -3.9184618259 -2.6492045499 -0.6820462140 |
|            |            | H 1.0 -1.8155346105 -3.1998686661 -0.7441435299 |
|            |            | O 8.0 -6.0933845322 -1.7109482830 -0.3936755778 |
|            |            | H 1.0 -3.7183959025 0.3976346803 -0.8412231789  |
|            |            | C 6.0 -2.5457949316 -2.8319845446 -0.0144216991 |
|            |            | H 1.0 -6.7236136808 -1.3167762146 0.2231534279  |
|            |            | H 1.0 -5.2752862336 0.8694411007 -0.1604448528  |
|            |            | C 6.0 -4.8762687390 -1.9632471053 0.3066330062  |
|            |            | H 1.0 -1.8797056703 -0.7732852239 -0.1883948538 |
|            |            | C 6.0 -4.2551142824 0.5653780683 0.0928205585   |
|            |            | H 1.0 -2.6088496296 -3.5701095212 0.7926415230  |
|            |            | H 1.0 1.3854288257 -2.7197055862 0.6208618651   |
|            |            | H 1.0 -5.0467752790 -2.6857380862 1.1202272062  |
|            |            | C 6.0 -2.0563617603 -1.5244826258 0.5931655548  |
|            |            | H 1.0 3.1079948530 -2.2767857116 0.6752197463   |
|            |            | C 6.0 -4.2880732829 -0.6912300979 0.9668496510  |
|            |            | H 1.0 -3.7751889438 1.3756238819 0.6483044805   |
|            |            | H 1.0 2.4885647013 -3.7745400129 2.6323983021   |
|            |            | C 6.0 2.1009299791 -1.9614942153 0.9551862256   |
|            |            | O 8.0 4.1130846121 1.0475962466 -2.7889455995   |
|            |            | O 8.0 3.6481811880 -0.8300464065 -1.1360522298  |
| Idarubicin | 57852-57-0 |                                                 |



|                      |            |   |     |               |               |               |
|----------------------|------------|---|-----|---------------|---------------|---------------|
|                      |            | H | 1.0 | 4.0948554903  | -0.2878757990 | -1.8450067807 |
|                      |            | O | 8.0 | -0.8798012198 | -1.7904457088 | 1.3068648014  |
|                      |            | C | 6.0 | 2.5844788931  | -0.1211816882 | -0.7461460438 |
|                      |            | O | 8.0 | -3.0121137280 | -1.0257261706 | 1.5297399693  |
|                      |            | C | 6.0 | 1.7680849945  | -0.6543939807 | 0.2901418745  |
|                      |            | C | 6.0 | 3.0976676034  | 1.6556810485  | -2.3857844444 |
|                      |            | H | 1.0 | -4.9032146438 | -0.4684096989 | 1.8498682948  |
|                      |            | C | 6.0 | 2.2484839627  | 1.1130532719  | -1.3312904668 |
|                      |            | O | 8.0 | 1.8217307138  | -3.2060127679 | 3.0429735678  |
|                      |            | H | 1.0 | 4.4008371910  | 2.9516027326  | -4.3178809972 |
|                      |            | C | 6.0 | 2.7288802590  | 2.9626296247  | -2.9827582995 |
|                      |            | C | 6.0 | 0.6343458438  | 0.0220813667  | 0.7061701985  |
|                      |            | C | 6.0 | 3.5271124174  | 3.5072192867  | -3.9958564658 |
|                      |            | C | 6.0 | 1.0915014681  | 1.8228489416  | -0.8843527970 |
|                      |            | C | 6.0 | 1.9655574199  | -1.8920119767 | 2.4961787755  |
|                      |            | C | 6.0 | 0.7251758508  | 3.1049209524  | -1.4690711605 |
|                      |            | C | 6.0 | 0.2861953354  | 1.2733588468  | 0.1321009781  |
|                      |            | C | 6.0 | 1.5862132165  | 3.6604981908  | -2.5415538642 |
|                      |            | O | 8.0 | -0.2861580853 | 3.7365455508  | -1.0882118101 |
|                      |            | C | 6.0 | -0.1957344880 | -0.6209951629 | 1.8015103773  |
|                      |            | C | 6.0 | 3.1933049198  | 4.7328137827  | -4.5644038149 |
|                      |            | H | 1.0 | 3.8154538412  | 5.1522598076  | -5.3492510455 |
|                      |            | C | 6.0 | 1.2584211217  | 4.8925162953  | -3.1200373892 |
|                      |            | C | 6.0 | 2.0584099099  | 5.4257604077  | -4.1263196520 |
|                      |            | O | 8.0 | 3.8576507296  | -0.3971854839 | 2.4595914666  |
|                      |            | O | 8.0 | -0.8087980527 | 1.8986588826  | 0.5836966112  |
|                      |            | H | 1.0 | 0.3745824201  | 5.4096617144  | -2.7635241692 |
|                      |            | C | 6.0 | 0.7081698899  | -1.0890292476 | 2.9478000697  |
|                      |            | C | 6.0 | 3.2091713382  | -1.1978796376 | 3.1056698274  |
|                      |            | H | 1.0 | -0.8735781211 | 2.7475557994  | 0.0591944369  |
|                      |            | H | 1.0 | 0.1264689028  | -1.7312206595 | 3.6135412785  |
|                      |            | H | 1.0 | 1.8012202442  | 6.3819655574  | -4.5719116909 |
|                      |            | H | 1.0 | -0.9354712283 | 0.0843237068  | 2.1844059847  |
|                      |            | H | 1.0 | 3.9002333879  | -2.5811756750 | 4.6031805309  |
|                      |            | H | 1.0 | 1.0054793127  | -0.1999617034 | 3.5145230378  |
|                      |            | C | 6.0 | 3.5529960819  | -1.5450738605 | 4.5412422110  |
|                      |            | H | 1.0 | 4.3348406083  | -0.8734464070 | 4.8975404033  |
|                      |            | H | 1.0 | 2.6696080971  | -1.4812661115 | 5.1843092128  |
| 5-Imino daunorubicin | 67324-99-6 | H | 1.0 | 3.6242963394  | 1.5474326107  | -7.0047608862 |
|                      |            | H | 1.0 | 1.4904835904  | 2.4551306063  | -6.0436431501 |
|                      |            | C | 6.0 | 3.2426523756  | 1.1854900357  | -6.0551349548 |
|                      |            | H | 1.0 | 4.8676395522  | -0.1833835448 | -5.7822079982 |
|                      |            | C | 6.0 | 2.0637755337  | 1.6917928104  | -5.5322893814 |

|   |     |               |               |               |
|---|-----|---------------|---------------|---------------|
| C | 6.0 | 3.9480968774  | 0.2030799782  | -5.3621388797 |
| H | 1.0 | 5.2103517815  | -2.2629314517 | -4.9325135415 |
| O | 8.0 | -0.2720147443 | 2.6688443350  | -4.5029440290 |
| C | 6.0 | 1.5840193474  | 1.2150702288  | -4.3071998808 |
| C | 6.0 | 3.4765265332  | -0.2817525568 | -4.1383250518 |
| H | 1.0 | 6.1298787260  | -0.9870974623 | -4.0736785593 |
| C | 6.0 | 5.3710174696  | -1.7701348612 | -3.9672446099 |
| C | 6.0 | 0.3146482143  | 1.8069213867  | -3.8096408601 |
| H | 1.0 | -1.5595335911 | 3.0012480201  | -3.5878814827 |
| C | 6.0 | 2.2686922421  | 0.2183217347  | -3.5735038379 |
| O | 8.0 | 4.1539210643  | -1.2442965813 | -3.4447634529 |
| H | 1.0 | 5.7094944384  | -2.5055299890 | -3.2372726847 |
| O | 8.0 | -2.0844954129 | 2.8523031123  | -2.7507993658 |
| C | 6.0 | -0.2046900420 | 1.3687217605  | -2.5298729271 |
| C | 6.0 | 1.7068211023  | -0.2531475637 | -2.2749475786 |
| H | 1.0 | -4.6517027446 | 0.3816248952  | -2.2666009054 |
| C | 6.0 | -1.4042554368 | 1.9311093004  | -2.0525615006 |
| C | 6.0 | 0.4736330976  | 0.3717804812  | -1.7723424999 |
| N | 7.0 | 2.2319046449  | -1.1895860134 | -1.5402871064 |
| H | 1.0 | -5.8623651146 | -0.7888926341 | -1.6941068052 |
| H | 1.0 | 3.0809709678  | -1.5820590878 | -1.9307961564 |
| H | 1.0 | -6.0269856837 | 0.9613684248  | -1.3242694725 |
| C | 6.0 | -5.3289156579 | 0.1285950799  | -1.4424441029 |
| H | 1.0 | -3.8470104936 | 2.4017255747  | -1.2254838202 |
| C | 6.0 | -1.9355481986 | 1.5317561108  | -0.7985202964 |
| C | 6.0 | -0.0670072577 | -0.0228597037 | -0.5285107400 |
| C | 6.0 | -3.2490672594 | 2.1302460685  | -0.3537649819 |
| H | 1.0 | 1.3106103785  | -1.2964318180 | -0.3293787073 |
| C | 6.0 | -1.2593915329 | 0.5932544610  | -0.0318533115 |
| C | 6.0 | -4.5339395144 | -0.0862638231 | -0.1713809176 |
| H | 1.0 | -3.0871153563 | 3.0630103587  | 0.2015859962  |
| O | 8.0 | 0.4904646200  | -0.9831124667 | 0.2082751522  |
| C | 6.0 | -4.0093838474 | 1.1755378977  | 0.5658934997  |
| O | 8.0 | -4.3667889718 | -1.1950690702 | 0.3045994152  |
| O | 8.0 | -5.1718928660 | 1.8927473733  | 1.0095971867  |
| H | 1.0 | -1.8928819557 | -0.9341537422 | 1.2979356172  |
| C | 6.0 | -1.7697145286 | 0.1542106069  | 1.3345593927  |
| H | 1.0 | -5.5876588691 | 1.3710893317  | 1.7111642340  |
| C | 6.0 | -3.1081822825 | 0.8067321371  | 1.7424842912  |
| H | 1.0 | -2.8880049528 | 1.7361205066  | 2.2779477152  |
| O | 8.0 | -0.7437895823 | 0.5018837477  | 2.2716890946  |
| H | 1.0 | 0.5750125664  | -2.0895454723 | 2.4059057494  |
| H | 1.0 | -3.6457202044 | 0.1356624103  | 2.4206440777  |
| H | 1.0 | 1.5664252197  | 0.1869495030  | 2.7957528409  |

|               |            |                                                 |
|---------------|------------|-------------------------------------------------|
|               |            | H 1.0 -1.7458032100 -1.9120601676 3.1709055295  |
|               |            | C 6.0 0.3838189926 -2.1667052784 3.4811084249   |
|               |            | H 1.0 1.0760493310 -4.0876980755 3.4481488798   |
|               |            | C 6.0 -0.8846692909 0.0536075825 3.6167953029   |
|               |            | H 1.0 2.4884369981 -1.8573833509 3.9327046036   |
|               |            | N 7.0 0.2775276413 -3.5855002429 3.8324704117   |
|               |            | C 6.0 -0.9534489984 -1.4713994924 3.7819813822  |
|               |            | C 6.0 1.4920472416 0.0683679792 3.8823267029    |
|               |            | H 1.0 -1.7667581662 0.5227910921 4.0746369853   |
|               |            | C 6.0 1.5216544382 -1.4269298439 4.2244950753   |
|               |            | O 8.0 0.2129214407 0.5920273610 4.3205524106    |
|               |            | H 1.0 2.4230938128 1.9537976392 4.3597851430    |
|               |            | H 1.0 3.5555514656 0.5909723147 4.2274562223    |
|               |            | C 6.0 2.5633538261 0.8921459581 4.5783130113    |
|               |            | H 1.0 0.3715237861 -3.6549533940 4.8460201165   |
|               |            | H 1.0 -1.2339401002 -1.6663573793 4.8252753051  |
|               |            | O 8.0 1.4114398477 -1.6246450546 5.6377236344   |
|               |            | H 1.0 2.5262505940 0.7453026251 5.6606524662    |
|               |            | H 1.0 0.7599405493 -0.9734770053 5.9401935594   |
| Marcellomycin | 63710-10-1 | H 1.0 7.2804610210 -9.1253416862 0.3623207661   |
|               |            | H 1.0 5.6174863873 -6.3374326310 1.7002088613   |
|               |            | H 1.0 6.1589412003 -10.6745745165 -1.2488095078 |
|               |            | C 6.0 6.2552541029 -8.9641883853 0.0466291482   |
|               |            | O 8.0 6.2394256816 -7.0612474213 1.4336150598   |
|               |            | C 6.0 5.6390490795 -9.8154207976 -0.8386057568  |
|               |            | C 6.0 5.5699563287 -7.8427436239 0.5782319426   |
|               |            | C 6.0 4.2986265186 -9.5944160862 -1.2457557606  |
|               |            | O 8.0 4.0889084698 -5.6671553981 1.5452644063   |
|               |            | C 6.0 4.2376106560 -7.6023083035 0.1899466238   |
|               |            | O 8.0 3.7574134122 -10.4574388535 -2.1093337257 |
|               |            | C 6.0 3.5966651579 -8.4879485167 -0.7320003090  |
|               |            | C 6.0 3.5199078858 -6.4549658677 0.7274015447   |
|               |            | H 1.0 2.8261277104 -10.1379326743 -2.2686015571 |
|               |            | C 6.0 2.2161338704 -8.2625235396 -1.1519590838  |
|               |            | O 8.0 1.6487883165 -9.0307595944 -1.9573441093  |
|               |            | H 1.0 2.9012453952 -4.5603162907 1.8467913755   |
|               |            | C 6.0 2.1409364705 -6.2215916280 0.3182908132   |
|               |            | C 6.0 1.4946376666 -7.0926756118 -0.5960540184  |
|               |            | O 8.0 1.9740623499 -4.2439092695 1.6797207048   |
|               |            | C 6.0 1.4212291067 -5.1123176365 0.8235118883   |
|               |            | H 1.0 -3.3697724879 -9.2565690787 0.1618806311  |
|               |            | O 8.0 -3.0141315399 -6.7767776182 0.9852797922  |
|               |            | C 6.0 0.1830526058 -6.8588744324 -0.9766567433  |

|   |     |               |               |               |
|---|-----|---------------|---------------|---------------|
| H | 1.0 | -0.2847384501 | -7.5417077879 | -1.6775111640 |
| H | 1.0 | -0.3678138404 | -3.5098912042 | 2.0192452266  |
| C | 6.0 | 0.0765855724  | -4.8895022084 | 0.4396567807  |
| C | 6.0 | -0.5322744588 | -5.7609618478 | -0.4622486639 |
| H | 1.0 | -4.8778987457 | -8.3428057589 | -0.0641515309 |
| C | 6.0 | -3.9742060201 | -8.7036309117 | -0.5605728766 |
| H | 1.0 | 0.8179948064  | -1.7140456621 | 1.8697352627  |
| H | 1.0 | -2.5378572438 | -4.4419905700 | 1.5236172104  |
| C | 6.0 | -2.7936831233 | -6.6929017186 | -0.2052904677 |
| C | 6.0 | -0.6213897724 | -3.6527441567 | 0.9638050420  |
| H | 1.0 | -4.2284749417 | -9.3334416655 | -1.4122056256 |
| O | 8.0 | -3.2250217765 | -7.6007635754 | -1.1058751657 |
| C | 6.0 | -1.9867734459 | -5.5857890600 | -0.8851072682 |
| C | 6.0 | -2.1421143964 | -3.7179725884 | 0.8044662154  |
| C | 6.0 | 0.2963265870  | -1.3849967183 | 0.9646879634  |
| O | 8.0 | -0.0587489884 | -2.5453525122 | 0.2096957801  |
| O | 8.0 | -0.8337881495 | -0.6880591554 | 1.4278823863  |
| H | 1.0 | -2.0529605974 | -5.7436316030 | -1.9645222005 |
| H | 1.0 | -2.5534699086 | -2.7362611490 | 1.0467796803  |
| H | 1.0 | 1.9850765153  | -1.2062786847 | -0.3036511145 |
| H | 1.0 | 1.7115148934  | 0.2068125323  | 0.7308288899  |
| C | 6.0 | -2.5568523470 | -4.1537523560 | -0.6097147809 |
| C | 6.0 | 1.2222521314  | -0.5363209264 | 0.0946543715  |
| H | 1.0 | -4.5454740544 | -4.7934666108 | -0.0550828564 |
| H | 1.0 | -3.3595692990 | -0.1222581675 | 1.6201457976  |
| O | 8.0 | -2.0159776220 | -3.2779271489 | -1.6022955273 |
| C | 6.0 | -4.0860583129 | -4.1523404478 | -0.8152099706 |
| H | 1.0 | -1.1892843698 | -2.8987326818 | -1.2581299728 |
| C | 6.0 | -1.5777596733 | 0.0118521968  | 0.4161340385  |
| H | 1.0 | -2.4075036451 | 1.3380988530  | 1.9099745269  |
| H | 1.0 | 3.1520332737  | -0.0648417768 | -1.5904136037 |
| H | 1.0 | -1.9544981568 | -0.7142703160 | -0.3196201309 |
| H | 1.0 | -4.6311329680 | -2.2840673442 | 0.1927755916  |
| C | 6.0 | -2.7562888668 | 0.6504637160  | 1.1358046842  |
| H | 1.0 | -0.4772131059 | 3.5146243448  | 2.6781510636  |
| H | 1.0 | -4.2877968773 | -4.6160938201 | -1.7893521627 |
| C | 6.0 | 0.4680417331  | 0.2049399127  | -1.0229479619 |
| H | 1.0 | -0.0274794631 | -0.5503860208 | -1.6688318961 |
| O | 8.0 | -0.1131268351 | 1.9732313939  | 0.5354309353  |
| C | 6.0 | -4.7342161570 | -2.7660306032 | -0.7849510122 |
| C | 6.0 | -0.6781943197 | 1.0010442239  | -0.3520988860 |
| C | 6.0 | 2.4913913176  | 0.2932544945  | -2.3822488903 |
| H | 1.0 | 0.9600337371  | 3.9059117554  | 1.7175852999  |
| H | 1.0 | 2.1887371464  | -0.5759803196 | -2.9992579642 |

|   |     |               |               |               |
|---|-----|---------------|---------------|---------------|
| H | 1.0 | -3.3955491486 | 1.1941921435  | 0.4334502193  |
| C | 6.0 | -0.1313240835 | 3.9874331063  | 1.7543998957  |
| H | 1.0 | -5.8052470167 | -2.8442621177 | -0.9967389308 |
| N | 7.0 | 1.3623314777  | 1.0409545938  | -1.8346632513 |
| H | 1.0 | -4.2812729245 | -2.1151518848 | -1.5358344510 |
| C | 6.0 | -0.6827222864 | 3.2445701239  | 0.5433348635  |
| H | 1.0 | -1.7785102855 | 3.1874716757  | 0.5846784380  |
| H | 1.0 | 3.0813216450  | 0.9610153507  | -3.0162612096 |
| H | 1.0 | -1.2918758908 | 1.4973836520  | -1.1109891272 |
| H | 1.0 | 0.0455232742  | 6.0037817622  | 2.5016999970  |
| C | 6.0 | -0.5435702475 | 5.4576112988  | 1.7471001207  |
| O | 8.0 | -1.9289329254 | 5.5354199318  | 2.0727945870  |
| C | 6.0 | 0.6520704153  | 1.7212015671  | -2.9155992233 |
| O | 8.0 | -0.3005885017 | 3.9150020770  | -0.6656132094 |
| H | 1.0 | -0.0575659262 | 2.4436369151  | -2.5129567016 |
| H | 1.0 | 0.1213822530  | 1.0239035945  | -3.5942801754 |
| H | 1.0 | -2.8710730299 | 5.0269267681  | -0.1425002082 |
| H | 1.0 | -2.1960948008 | 6.4494264328  | 1.8958633821  |
| H | 1.0 | 1.3750142418  | 2.2816997908  | -3.5154065921 |
| H | 1.0 | 2.9093148591  | 8.4030782280  | 2.1795793784  |
| H | 1.0 | 0.8353504004  | 6.1735120524  | 0.2759338410  |
| C | 6.0 | -0.2529649885 | 6.0927907972  | 0.3797270260  |
| H | 1.0 | 2.3753247853  | 9.7249941706  | 3.2397349709  |
| H | 1.0 | 0.4090737397  | 8.5857634544  | 2.2564979852  |
| C | 6.0 | -0.7932543756 | 5.2549676592  | -0.8050427873 |
| C | 6.0 | -2.3074933746 | 5.3247084290  | -1.0275228676 |
| C | 6.0 | 2.4145271150  | 9.3771598426  | 2.2030858298  |
| H | 1.0 | -2.5788937642 | 4.6755370304  | -1.8653698297 |
| O | 8.0 | -0.8333779153 | 7.4092857613  | 0.4017374672  |
| H | 1.0 | -2.5997199954 | 6.3479647598  | -1.2784740410 |
| C | 6.0 | 1.0077848006  | 9.2663058225  | 1.6375509061  |
| H | 1.0 | -0.3050410512 | 5.6118091768  | -1.7196487915 |
| H | 1.0 | 3.0109641863  | 10.0888199307 | 1.6273063396  |
| H | 1.0 | 0.1599670680  | 11.0597843796 | 2.5229826456  |
| O | 8.0 | 1.1273508517  | 8.7061441143  | 0.3083123777  |
| H | 1.0 | -1.7432849543 | 9.8232065536  | 1.6131898925  |
| C | 6.0 | 0.2672092606  | 10.6038655125 | 1.5327661335  |
| C | 6.0 | -0.1189352890 | 8.4038526921  | -0.3089360872 |
| H | 1.0 | 0.1625688267  | 8.0284977208  | -1.3004577395 |
| C | 6.0 | -1.1277779134 | 10.4024740274 | 0.9155727389  |
| C | 6.0 | -1.0086833800 | 9.6423789795  | -0.4176292162 |
| O | 8.0 | 1.0003938346  | 11.5465826655 | 0.7417653298  |
| H | 1.0 | -1.9990375703 | 9.3632723748  | -0.7860854468 |
| O | 8.0 | -1.7746215563 | 11.6494237354 | 0.7400403116  |

|           |            |   |     |               |               |               |
|-----------|------------|---|-----|---------------|---------------|---------------|
|           |            | H | 1.0 | 1.3851109428  | 11.0430834673 | 0.0079631688  |
|           |            | H | 1.0 | -1.0853406730 | 12.2451278543 | 0.4040846151  |
|           |            | H | 1.0 | -0.5638953147 | 10.3135621079 | -1.1614446624 |
|           |            | H | 1.0 | 7.7029446676  | 1.0150980091  | -0.3151042160 |
|           |            | H | 1.0 | 6.6856704192  | 2.4565621179  | -0.1823968547 |
|           |            | H | 1.0 | 4.0475078482  | 4.8508416590  | 2.8688669713  |
|           |            | H | 1.0 | 5.3114626921  | 3.0573052196  | 1.7642205619  |
|           |            | C | 6.0 | 6.6700814605  | 1.3731519954  | -0.2736837376 |
|           |            | H | 1.0 | 3.4845011498  | 5.2134105654  | 1.2290038349  |
|           |            | H | 1.0 | 7.2872849306  | -0.9030235262 | 0.6662119420  |
|           |            | C | 6.0 | 3.2500193029  | 4.6681051024  | 2.1439068696  |
|           |            | O | 8.0 | 4.5737531404  | 3.3121118891  | -0.0990575602 |
|           |            | N | 7.0 | 6.0176560098  | 0.7385701154  | 0.8749237221  |
|           |            | H | 1.0 | 6.1917128294  | 1.1216249039  | -1.2401234552 |
|           |            | C | 6.0 | 4.4740327235  | 2.6756058904  | 1.1702199638  |
|           |            | H | 1.0 | 2.3093584068  | 5.0351296950  | 2.5607446726  |
|           |            | C | 6.0 | 6.2155772314  | -0.7126498541 | 0.7752956522  |
|           |            | H | 1.0 | 4.9354062065  | 0.4636754810  | 3.1024324303  |
|           |            | H | 1.0 | 3.9966550038  | 2.8402422157  | -0.7160223702 |
|           |            | C | 6.0 | 3.1691403803  | 3.1677929793  | 1.8740779652  |
|           |            | C | 6.0 | 4.6110415842  | 1.1287413199  | 1.0935931220  |
|           |            | H | 1.0 | 5.8606716967  | -1.2309019752 | 1.6627376050  |
|           |            | O | 8.0 | 3.0903847416  | 2.5540083321  | 3.1761204820  |
|           |            | H | 1.0 | 5.6997715486  | -1.1561527360 | -0.0965025368 |
|           |            | C | 6.0 | 4.0931284380  | 0.4467203347  | 2.4012107233  |
|           |            | H | 1.0 | 1.9092605431  | 4.4780558289  | -0.2432557620 |
|           |            | H | 1.0 | 3.9596424311  | 0.7771299216  | 0.2634835895  |
|           |            | C | 6.0 | 2.9318060368  | 1.1774660021  | 3.0944216361  |
|           |            | H | 1.0 | 2.8179904682  | 0.7997780758  | 4.1115332604  |
|           |            | C | 6.0 | 1.9439904304  | 2.7647571393  | 1.0627897206  |
|           |            | C | 6.0 | 1.4635780603  | 3.5234528391  | 0.0089871455  |
|           |            | O | 8.0 | 3.7202164695  | -0.9087427062 | 2.2314717420  |
|           |            | O | 8.0 | 1.6979844935  | 0.8103812165  | 2.4485187498  |
|           |            | H | 1.0 | 2.7840452059  | -0.9367124011 | 1.9667295818  |
|           |            | C | 6.0 | 1.3206894270  | 1.5255987861  | 1.3607564762  |
|           |            | C | 6.0 | 0.3601121088  | 3.1011274354  | -0.7580208005 |
|           |            | O | 8.0 | -0.0657391891 | 3.9259153692  | -1.7232062086 |
|           |            | C | 6.0 | 0.2893648108  | 1.0268350950  | 0.5541215334  |
|           |            | H | 1.0 | -0.8384063910 | 3.4806431654  | -2.1546456771 |
|           |            | C | 6.0 | -0.2266891424 | 1.8419666018  | -0.4968803726 |
|           |            | O | 8.0 | 0.3984016950  | -1.2141010789 | 1.3745928963  |
|           |            | C | 6.0 | -0.1967172155 | -0.3716385308 | 0.7064749204  |
|           |            | C | 6.0 | -1.3763815024 | 1.4051509265  | -1.2879217627 |
| Menogaril | 71628-96-1 |   |     |               |               |               |

|                         |            |   |     |               |               |               |
|-------------------------|------------|---|-----|---------------|---------------|---------------|
|                         |            | O | 8.0 | -1.8410276142 | 2.1552898278  | -2.2007853822 |
|                         |            | C | 6.0 | -1.4340771436 | -0.7493412591 | -0.0414383220 |
|                         |            | C | 6.0 | -1.9940351658 | 0.1207126985  | -1.0070638313 |
|                         |            | H | 1.0 | -3.1372292488 | 1.2877414264  | -2.7323641392 |
|                         |            | H | 1.0 | -1.5300918675 | -2.6473806903 | 0.9102064846  |
|                         |            | C | 6.0 | -2.0045525372 | -1.9883779889 | 0.1909295945  |
|                         |            | C | 6.0 | -3.1560314501 | -0.2931163628 | -1.7078902612 |
|                         |            | O | 8.0 | -3.7037531177 | 0.4748942927  | -2.6617343697 |
|                         |            | C | 6.0 | -3.1630503993 | -2.3980587060 | -0.4975204680 |
|                         |            | C | 6.0 | -3.7635234789 | -1.5403622485 | -1.4261487173 |
|                         |            | H | 1.0 | -5.7318388993 | 0.4567089968  | -0.7868116393 |
|                         |            | H | 1.0 | -2.8925543779 | -4.4817150118 | -0.6860296948 |
|                         |            | H | 1.0 | -3.7072208349 | -4.0223152770 | 0.7988771140  |
|                         |            | C | 6.0 | -3.6613303281 | -3.8115390308 | -0.2749867681 |
|                         |            | H | 1.0 | -5.0654971202 | -1.4788688445 | -3.1350196643 |
|                         |            | C | 6.0 | -5.0499992385 | -1.9334011868 | -2.1370539004 |
|                         |            | C | 6.0 | -6.4662279425 | -0.0850280753 | -1.3952117792 |
|                         |            | H | 1.0 | -6.4593348852 | 0.3362296166  | -2.4073880547 |
|                         |            | O | 8.0 | -6.2201060583 | -1.4837868991 | -1.4185021563 |
|                         |            | H | 1.0 | -4.4294425525 | -3.8245856868 | -2.9386782198 |
|                         |            | H | 1.0 | -7.4571815439 | 0.0432660075  | -0.9538080768 |
|                         |            | C | 6.0 | -5.0375431675 | -4.1650519752 | -0.8837961965 |
|                         |            | C | 6.0 | -5.1926147286 | -3.4539113027 | -2.2437475056 |
|                         |            | O | 8.0 | -6.0783868462 | -3.7858571960 | 0.0166986703  |
|                         |            | H | 1.0 | -6.3060615647 | -2.8602599281 | -0.1733702902 |
|                         |            | H | 1.0 | -4.4022830161 | -6.0836253563 | -1.7204220615 |
|                         |            | H | 1.0 | -5.0556677459 | -6.1694186292 | -0.0698345946 |
|                         |            | C | 6.0 | -5.1634565694 | -5.6821525258 | -1.0438410013 |
|                         |            | H | 1.0 | -6.1739598880 | -3.6858117951 | -2.6692950038 |
|                         |            | H | 1.0 | -6.1533944731 | -5.9308286224 | -1.4358259004 |
|                         |            | H | 1.0 | -1.6755327775 | -1.1783348926 | -4.6943858571 |
|                         |            | O | 8.0 | -0.7443547402 | -1.1519990569 | -4.3325076609 |
|                         |            | O | 8.0 | -3.2681269411 | -0.9103212356 | -4.4842588432 |
|                         |            | H | 1.0 | -5.6371681459 | -0.6473829155 | -4.4838858482 |
|                         |            | H | 1.0 | 3.4625181694  | 0.9816155329  | -4.8831271569 |
|                         |            | H | 1.0 | 1.5861718103  | -0.6522044952 | -4.0853108237 |
|                         |            | H | 1.0 | 4.8106007094  | 1.4033888734  | -3.8430809547 |
|                         |            | C | 6.0 | 3.7534001060  | 1.6390953071  | -4.0509870918 |
|                         |            | C | 6.0 | -5.7427010255 | -0.2255067584 | -3.4919846302 |
|                         |            | H | 1.0 | -7.8805273747 | -0.0039224651 | -3.5667658138 |
|                         |            | H | 1.0 | 1.8199046428  | -1.9566049694 | -2.9494375350 |
|                         |            | C | 6.0 | -3.2964684750 | -0.4449183581 | -3.3235708604 |
|                         |            | C | 6.0 | 1.6496940762  | -0.8743121156 | -3.0164554398 |
| 4'-O-methylodoxorubicin | 77121-90-5 | H | 1.0 | -1.6755327775 | -1.1783348926 | -4.6943858571 |
|                         |            | O | 8.0 | -0.7443547402 | -1.1519990569 | -4.3325076609 |
|                         |            | O | 8.0 | -3.2681269411 | -0.9103212356 | -4.4842588432 |
|                         |            | H | 1.0 | -5.6371681459 | -0.6473829155 | -4.4838858482 |
|                         |            | H | 1.0 | 3.4625181694  | 0.9816155329  | -4.8831271569 |
|                         |            | H | 1.0 | 1.5861718103  | -0.6522044952 | -4.0853108237 |
|                         |            | H | 1.0 | 4.8106007094  | 1.4033888734  | -3.8430809547 |
|                         |            | C | 6.0 | 3.7534001060  | 1.6390953071  | -4.0509870918 |
|                         |            | C | 6.0 | -5.7427010255 | -0.2255067584 | -3.4919846302 |
|                         |            | H | 1.0 | -7.8805273747 | -0.0039224651 | -3.5667658138 |
|                         |            | H | 1.0 | 1.8199046428  | -1.9566049694 | -2.9494375350 |
|                         |            | C | 6.0 | -3.2964684750 | -0.4449183581 | -3.3235708604 |
|                         |            | C | 6.0 | 1.6496940762  | -0.8743121156 | -3.0164554398 |

|   |     |               |               |               |
|---|-----|---------------|---------------|---------------|
| C | 6.0 | -0.8479363122 | -0.6509213712 | -3.0949850594 |
| O | 8.0 | 4.0089349739  | -0.9036571075 | -2.9334452683 |
| O | 8.0 | 3.5793669722  | 2.9879460366  | -4.3798678295 |
| C | 6.0 | -6.9809024270 | 0.1346266881  | -2.9747094310 |
| H | 1.0 | 4.7873075831  | -0.6859915889 | -2.4018137942 |
| C | 6.0 | -4.5939899096 | -0.0418001784 | -2.7194756558 |
| C | 6.0 | -2.0846339295 | -0.2845374594 | -2.5398415185 |
| C | 6.0 | 2.8860297715  | -0.2059157322 | -2.3867028378 |
| C | 6.0 | 0.3521252374  | -0.4982287736 | -2.3429568165 |
| C | 6.0 | 2.9452501984  | 1.2683832495  | -2.8138809244 |
| H | 1.0 | 3.0514063074  | 3.3647767777  | -3.6534310187 |
| O | 8.0 | 2.3591817117  | 2.1501809207  | -2.2051798890 |
| C | 6.0 | -7.0822771749 | 0.6749478089  | -1.6959829463 |
| C | 6.0 | -4.6582569022 | 0.5073260295  | -1.4148741688 |
| H | 1.0 | 2.8816185350  | -1.4579006251 | -0.6783555568 |
| C | 6.0 | -2.1404609993 | 0.2625036560  | -1.2279688607 |
| C | 6.0 | 2.8236912557  | -0.3805848967 | -0.8655064552 |
| C | 6.0 | 0.2990652222  | -0.0130724394 | -1.0460309676 |
| H | 1.0 | -8.0569040739 | 0.9476418328  | -1.3125967797 |
| C | 6.0 | -5.9382179421 | 0.8678865272  | -0.9041238679 |
| H | 1.0 | 3.6890426501  | 0.0873425550  | -0.3822419777 |
| C | 6.0 | -3.4106985494 | 0.6923130142  | -0.6326403301 |
| C | 6.0 | -0.9497688387 | 0.4071219436  | -0.4926976805 |
| C | 6.0 | 1.5450356206  | 0.1374571832  | -0.1872747216 |
| H | 1.0 | 1.6560278980  | 1.1983690412  | 0.0571922524  |
| O | 8.0 | -6.0014198785 | 1.3855667310  | 0.3398471591  |
| O | 8.0 | -3.4212185372 | 1.2012607428  | 0.5090404124  |
| O | 8.0 | 1.3537539425  | -0.6135893136 | 1.0231749705  |
| H | 1.0 | -7.7451483289 | 2.5399020568  | 0.2826304792  |
| O | 8.0 | -0.9419022270 | 0.9571651204  | 0.7258359259  |
| H | 1.0 | -7.9377475614 | 0.8939827411  | 0.9608247844  |
| H | 1.0 | 1.1671716743  | 1.1001395786  | 2.1468529665  |
| C | 6.0 | -7.2642123744 | 1.7556394563  | 0.8794722551  |
| H | 1.0 | -1.9022784873 | 1.1877771821  | 0.9161103796  |
| C | 6.0 | 1.5838838848  | 0.0921065083  | 2.2281357164  |
| H | 1.0 | -0.1086203473 | -0.9254415105 | 3.0529785729  |
| H | 1.0 | -7.0505775311 | 2.1417738148  | 1.8761823651  |
| C | 6.0 | 0.9163150718  | -0.6919107225 | 3.3588948054  |
| H | 1.0 | 3.6329189142  | -1.5540290435 | 1.8222903582  |
| O | 8.0 | 2.9710304432  | 0.2972661653  | 2.4660021813  |
| H | 1.0 | 1.6099239487  | -2.6345337459 | 2.8151629239  |
| H | 1.0 | 0.8532138104  | -0.0394933263 | 4.2346276010  |
| C | 6.0 | 3.7317457668  | -0.9056135388 | 2.7053781195  |
| C | 6.0 | 1.6821338309  | -1.9875224951 | 3.7001379472  |



|                       |            |   |     |               |               |               |
|-----------------------|------------|---|-----|---------------|---------------|---------------|
|                       |            | H | 1.0 | 5.5134893395  | 0.0698229583  | 1.9761146982  |
|                       |            | H | 1.0 | 0.1624443491  | -2.7860654051 | 4.8223595490  |
|                       |            | N | 7.0 | 1.1784237545  | -2.7471103910 | 4.8420121992  |
|                       |            | C | 6.0 | 5.1887528713  | -0.4929674479 | 2.8557572370  |
|                       |            | C | 6.0 | 3.1907437089  | -1.7252119084 | 3.8916979420  |
|                       |            | H | 1.0 | 3.6917216140  | -2.6998056833 | 3.8639138424  |
|                       |            | H | 1.0 | 5.8220358167  | -1.3795513425 | 2.9566016485  |
|                       |            | H | 1.0 | 2.1543259461  | 0.1144737692  | 5.9760036243  |
|                       |            | H | 1.0 | 3.2777414448  | 0.8118286806  | 4.7825289413  |
|                       |            | H | 1.0 | 1.4529093993  | -2.2824338105 | 5.7038847050  |
|                       |            | H | 1.0 | 5.3383819886  | 0.1304795329  | 3.7392847729  |
|                       |            | C | 6.0 | 3.1820738334  | 0.0792310866  | 5.5878052670  |
|                       |            | O | 8.0 | 3.5542226996  | -1.2358236591 | 5.1855092196  |
|                       |            | H | 1.0 | 3.8579102773  | 0.3501541726  | 6.4043503246  |
| Morpholino adriamycin | 89196-04-3 | H | 1.0 | -4.2141316191 | 4.2189006173  | 4.8690221537  |
|                       |            | H | 1.0 | -5.6654406817 | 4.1416721489  | 3.8225975897  |
|                       |            | C | 6.0 | -4.5690827444 | 4.1400638641  | 3.8346491050  |
|                       |            | H | 1.0 | -4.2002077842 | 4.9895923397  | 3.2601866882  |
|                       |            | H | 1.0 | -5.5525219137 | 2.4305358701  | 5.3214219373  |
|                       |            | O | 8.0 | -4.0401367028 | 2.9879977694  | 3.1869160254  |
|                       |            | C | 6.0 | -5.1345120071 | 1.5749163844  | 4.8071796099  |
|                       |            | C | 6.0 | -4.3261313277 | 1.7641405159  | 3.6736804563  |
|                       |            | H | 1.0 | -6.0352771474 | 0.1766160697  | 6.1594349366  |
|                       |            | C | 6.0 | -5.4076817109 | 0.2954899552  | 5.2814114107  |
|                       |            | O | 8.0 | -2.6404605928 | 1.8778251080  | 1.3062086242  |
|                       |            | C | 6.0 | -3.7799064199 | 0.6330014032  | 3.0015453119  |
|                       |            | C | 6.0 | -2.9234022238 | 0.7628845303  | 1.7996775614  |
|                       |            | H | 1.0 | -1.7617564623 | 1.5081051937  | 0.0666348410  |
|                       |            | C | 6.0 | -4.8844858249 | -0.8218527726 | 4.6412330842  |
|                       |            | C | 6.0 | -4.0788858814 | -0.6548008746 | 3.5135009713  |
|                       |            | O | 8.0 | -1.2732530677 | 0.8322648139  | -0.5000370226 |
|                       |            | H | 1.0 | -5.0828283053 | -1.8272774276 | 4.9915566402  |
|                       |            | H | 1.0 | 5.9104026367  | -0.4132062234 | -1.0242367559 |
|                       |            | C | 6.0 | -2.3970701595 | -0.4579722629 | 1.1801624973  |
|                       |            | C | 6.0 | -1.5742624627 | -0.3535042167 | 0.0463783635  |
|                       |            | C | 6.0 | -3.5467962015 | -1.8862318823 | 2.8703152582  |
|                       |            | H | 1.0 | 5.5811179054  | -0.7134355593 | 0.6898276792  |
|                       |            | O | 8.0 | 4.6820055865  | 1.8491026556  | -1.3145874171 |
|                       |            | H | 1.0 | 4.5685964050  | 1.3262692228  | -2.1227166158 |
|                       |            | H | 1.0 | -0.4925116704 | -0.5221214209 | -2.3723714130 |
|                       |            | C | 6.0 | 5.2062360398  | -0.8711256126 | -0.3259375948 |
|                       |            | C | 6.0 | -2.6976585197 | -1.7484879542 | 1.6979310692  |
|                       |            | H | 1.0 | 1.8500279691  | -0.4928446024 | -3.1114297973 |

|   |     |               |               |               |
|---|-----|---------------|---------------|---------------|
| H | 1.0 | 5.1613452500  | -1.9458393978 | -0.5188510465 |
| O | 8.0 | -3.8318118683 | -3.0079969282 | 3.3408727972  |
| C | 6.0 | -1.0446595495 | -1.5237871690 | -0.5698905459 |
| C | 6.0 | -0.1229749278 | -1.3504203414 | -1.7578139646 |
| C | 6.0 | -2.1793867386 | -2.8974259572 | 1.0773502086  |
| H | 1.0 | -0.9562283910 | -2.7938744406 | -3.1337123443 |
| C | 6.0 | 3.7998893138  | 1.2777197418  | -0.3451563988 |
| C | 6.0 | 2.0283578941  | -0.2087099308 | -2.0666044527 |
| C | 6.0 | 3.8254638633  | -0.2535210905 | -0.4687237179 |
| H | 1.0 | 2.3017767163  | 1.8312532536  | -2.6649558664 |
| H | 1.0 | 4.1783188794  | 1.5880213203  | 0.6341934587  |
| H | 1.0 | 1.1458424448  | 4.3528369264  | 1.2446956046  |
| C | 6.0 | -1.3371092168 | -2.7818734318 | -0.0682641815 |
| H | 1.0 | 2.0978419632  | 5.7105535264  | -2.4497966242 |
| H | 1.0 | -3.0338640050 | -4.0140233047 | 2.3200321042  |
| O | 8.0 | 1.1703335452  | -0.9864543253 | -1.2111055270 |
| O | 8.0 | 3.3515090561  | -0.5987827477 | -1.8001672813 |
| C | 6.0 | -0.0132461965 | -2.6225867529 | -2.6041533804 |
| O | 8.0 | -2.4452196959 | -4.1301327324 | 1.5228429813  |
| O | 8.0 | 0.5383348181  | 5.2841875640  | -1.2286198718 |
| C | 6.0 | 1.7934416811  | 1.2933079704  | -1.8564715743 |
| N | 7.0 | 2.1754256346  | 3.1702769754  | -0.1340117863 |
| H | 1.0 | 0.7684348836  | -2.4954797450 | -3.3612286121 |
| H | 1.0 | -1.6760463555 | -4.5595899267 | -1.1948694385 |
| H | 1.0 | 3.1443915567  | -0.6906165855 | 0.2712954040  |
| C | 6.0 | 2.3357439358  | 1.7641145219  | -0.4830729451 |
| C | 6.0 | 0.9177786005  | 3.5920727305  | 0.4824927429  |
| C | 6.0 | 1.6863512049  | 4.8318928061  | -1.9418340478 |
| H | 1.0 | -0.9287464204 | 4.6439057075  | 0.0176282636  |
| C | 6.0 | -0.8351202331 | -4.0557584403 | -0.7019404835 |
| C | 6.0 | -0.0701256804 | 4.2158359022  | -0.5100004233 |
| H | 1.0 | 3.0975491841  | 5.0299502116  | -0.3458927331 |
| C | 6.0 | 2.7260117985  | 4.2222846398  | -0.9943191089 |
| H | 1.0 | 0.7251630489  | 1.5043047745  | -1.9384901303 |
| C | 6.0 | 0.2987303266  | -3.8553734311 | -1.7271785241 |
| H | 1.0 | 1.3828056005  | 4.1018906724  | -2.7114850175 |
| H | 1.0 | 0.4491231603  | 2.7448716863  | 0.9927734800  |
| H | 1.0 | 1.7743814653  | 1.2120652184  | 0.2799041568  |
| O | 8.0 | -0.6284010041 | -5.5247295521 | -3.1939244871 |
| H | 1.0 | -0.4854590679 | -4.7371514617 | 0.0792859072  |
| H | 1.0 | 1.7415663400  | -2.7843134289 | -0.9628239623 |
| H | 1.0 | -0.4446502297 | 3.4540013269  | -1.2139692635 |
| C | 6.0 | 0.3693283179  | -5.0827151910 | -2.6449826929 |
| O | 8.0 | 1.5619732416  | -3.7322183487 | -1.0888833578 |

|     |            |   |     |               |               |               |
|-----|------------|---|-----|---------------|---------------|---------------|
|     |            | H | 1.0 | 3.5816649908  | 3.8300931986  | -1.5454495548 |
|     |            | C | 6.0 | 1.7149567799  | -5.7359817989 | -2.8931638258 |
|     |            | H | 1.0 | 0.6561043879  | -6.8535565668 | -4.0171316093 |
|     |            | H | 1.0 | 2.4180277022  | -4.9647213677 | -3.2427829039 |
|     |            | O | 8.0 | 1.6049998821  | -6.7909903594 | -3.8084785853 |
|     |            | H | 1.0 | 2.1107383840  | -6.0701744240 | -1.9213064128 |
|     |            | H | 1.0 | -2.7778643250 | 3.2183676172  | -4.5064436301 |
|     |            | H | 1.0 | -3.8444055276 | 1.8748886603  | -4.9604454630 |
|     |            | H | 1.0 | -1.5441394476 | 1.0165536480  | -4.6588414453 |
|     |            | C | 6.0 | -3.2201804963 | 2.2818275655  | -4.1588121197 |
|     |            | H | 1.0 | -0.0573583045 | 2.8966401755  | -3.8766536694 |
|     |            | O | 8.0 | 0.7472256646  | 0.8066542053  | -3.8302827888 |
|     |            | O | 8.0 | -0.6168065505 | 3.0761532276  | -3.1043158146 |
|     |            | C | 6.0 | -2.1273483516 | 1.2817279346  | -3.7701974071 |
|     |            | H | 1.0 | 0.8847226898  | -0.1136799139 | -4.1003166584 |
|     |            | H | 1.0 | -3.8819810129 | 2.5211523692  | -3.3192827152 |
|     |            | H | 1.0 | 0.6585187314  | -2.8369848824 | -3.8750366480 |
|     |            | H | 1.0 | -2.5831246910 | 0.3521141196  | -3.4056319377 |
|     |            | O | 8.0 | 0.5900714502  | -1.8535802144 | -3.6650445965 |
|     |            | C | 6.0 | -1.1371003952 | 1.8088765316  | -2.7048832568 |
|     |            | C | 6.0 | 0.0854860278  | 0.8404821487  | -2.5779283663 |
|     |            | O | 8.0 | 0.3484389103  | -4.3357798208 | -3.5168424348 |
|     |            | H | 1.0 | 0.7583913789  | 1.3110235261  | -1.8494933255 |
|     |            | C | 6.0 | -0.1112764425 | -1.7606181097 | -2.5194288655 |
|     |            | H | 1.0 | 0.0146412715  | -6.7474428217 | -3.2298676871 |
|     |            | C | 6.0 | -0.3686227231 | -0.4742478772 | -1.9716234896 |
|     |            | C | 6.0 | -0.3053112669 | -4.2255785153 | -2.4553698174 |
|     |            | H | 1.0 | -2.8914801181 | 1.9008637528  | -1.4160764763 |
|     |            | C | 6.0 | -1.8061566209 | 1.9985178231  | -1.3219159465 |
|     |            | C | 6.0 | -0.5844116710 | -2.9153625093 | -1.8713969066 |
|     |            | C | 6.0 | -0.5540620158 | -6.6847297430 | -2.3099348247 |
|     |            | H | 1.0 | -1.5994342185 | 3.0139066832  | -0.9761010910 |
|     |            | C | 6.0 | -0.8131886421 | -5.4322425177 | -1.7643039537 |
|     |            | H | 1.0 | -0.8290519923 | -8.8112721135 | -2.0876647314 |
|     |            | C | 6.0 | -1.0954061150 | -0.3674013747 | -0.7890918251 |
|     |            | C | 6.0 | -1.0307801724 | -7.8326830702 | -1.6628777132 |
|     |            | C | 6.0 | -1.3313288621 | -2.8011947655 | -0.6633623604 |
|     |            | C | 6.0 | -1.3393695576 | 1.0242194708  | -0.2259124569 |
|     |            | H | 1.0 | 5.8000841708  | 2.7077101675  | 0.3495956544  |
|     |            | C | 6.0 | -1.5552583513 | -5.3047327630 | -0.5609034912 |
|     |            | C | 6.0 | -1.5836802097 | -1.5229372571 | -0.1262341550 |
|     |            | H | 1.0 | 3.5517309780  | 3.9061968145  | 0.3941947379  |
|     |            | C | 6.0 | -1.8275680347 | -3.9904270960 | 0.0125114436  |
| MX2 | NCI 619003 |   |     |               |               |               |

|            |                            |   |     |               |               |               |
|------------|----------------------------|---|-----|---------------|---------------|---------------|
|            |                            | C | 6.0 | -1.7567883945 | -7.7372132141 | -0.4862592165 |
|            |                            | O | 8.0 | -0.1080733649 | 1.5344861403  | 0.3359556978  |
|            |                            | H | 1.0 | 4.4551726318  | 1.6053826408  | 0.7315094311  |
|            |                            | H | 1.0 | -2.0880105523 | 0.9809795389  | 0.5671506967  |
|            |                            | C | 6.0 | -2.0296557246 | -6.4778641479 | 0.0815634864  |
|            |                            | H | 1.0 | -2.1318006532 | -8.6167459052 | 0.0256197316  |
|            |                            | O | 8.0 | -2.2755739581 | -1.3480152377 | 1.0081810576  |
|            |                            | C | 6.0 | 5.0299201349  | 2.4756601960  | 1.0928642456  |
|            |                            | H | 1.0 | 1.5848739007  | 3.4756765081  | 1.1329422729  |
|            |                            | C | 6.0 | 4.1052760977  | 3.6792009646  | 1.3116522780  |
|            |                            | O | 8.0 | -2.4915969884 | -3.8879214679 | 1.0891268525  |
|            |                            | H | 1.0 | -2.5334553437 | -2.2534543849 | 1.3254373855  |
|            |                            | H | 1.0 | -0.7219507544 | 3.6875825410  | 1.5067242991  |
|            |                            | H | 1.0 | 4.7425569454  | 4.5485921280  | 1.5341174835  |
|            |                            | O | 8.0 | -2.7343092802 | -6.4447153856 | 1.2168943341  |
|            |                            | H | 1.0 | -2.8292232552 | -5.4921966748 | 1.4688565671  |
|            |                            | H | 1.0 | 2.2052602173  | 1.0685727662  | 1.2538071824  |
|            |                            | O | 8.0 | 5.7176167880  | 2.1429684353  | 2.2938439449  |
|            |                            | C | 6.0 | 0.1084232549  | 1.2009113658  | 1.6963698520  |
|            |                            | C | 6.0 | 1.8169708713  | 3.0500512978  | 2.1165264651  |
|            |                            | C | 6.0 | 1.5713453978  | 1.5223693771  | 2.0197823471  |
|            |                            | C | 6.0 | -0.6419952523 | 3.3282791410  | 2.5400899263  |
|            |                            | H | 1.0 | 0.9167516438  | 4.7291067128  | 3.1393948332  |
|            |                            | N | 7.0 | 3.1705960916  | 3.5011060039  | 2.4213319327  |
|            |                            | H | 1.0 | -0.1157089404 | 0.1419031031  | 1.8697699150  |
|            |                            | H | 1.0 | -2.7388414020 | 3.5515572444  | 2.9962842864  |
|            |                            | C | 6.0 | 0.7617336884  | 3.6468174088  | 3.0810973822  |
|            |                            | O | 8.0 | -0.7992908808 | 1.8874062963  | 2.5491811999  |
|            |                            | H | 1.0 | -1.7584959335 | 4.9950616786  | 3.3292460855  |
|            |                            | H | 1.0 | 4.2276525863  | 0.9380067743  | 3.0918408689  |
|            |                            | C | 6.0 | -1.7753002392 | 3.9018311041  | 3.3753093136  |
|            |                            | C | 6.0 | 4.8026043678  | 1.8441889026  | 3.3463077358  |
|            |                            | H | 1.0 | 1.8190289127  | 1.0480990012  | 2.9754137238  |
|            |                            | C | 6.0 | 3.8636154767  | 3.0248223756  | 3.6222635179  |
|            |                            | H | 1.0 | 4.4764925568  | 3.8526727611  | 4.0088657331  |
|            |                            | H | 1.0 | 5.4138122448  | 1.6219476559  | 4.2273330544  |
|            |                            | H | 1.0 | -1.6772912027 | 3.6031146113  | 4.4215981029  |
|            |                            | O | 8.0 | 0.8774496684  | 3.1498857268  | 4.4172384866  |
|            |                            | H | 1.0 | 3.1295481895  | 2.7760131592  | 4.3896101844  |
|            |                            | H | 1.0 | 0.3985854022  | 2.3068786516  | 4.4287220290  |
| NSC 286628 | NSC 286628 /<br>67903-59-7 | H | 1.0 | -0.3374915892 | -1.6051806595 | -6.2974900014 |
|            |                            | H | 1.0 | -2.1221541211 | -2.2617139599 | -7.8061109043 |
|            |                            | H | 1.0 | -4.4957332679 | -2.8653292578 | -8.1659034087 |

|   |     |               |               |               |
|---|-----|---------------|---------------|---------------|
| H | 1.0 | -0.8878105439 | 0.0203893531  | -5.8788708448 |
| C | 6.0 | -2.8547274141 | -2.0618449306 | -7.0270835480 |
| C | 6.0 | -4.1931992050 | -2.4010664461 | -7.2318694958 |
| H | 1.0 | -0.7634657938 | -3.5312432682 | -5.4279144951 |
| C | 6.0 | -1.0071284158 | -1.0403067409 | -5.6369475931 |
| C | 6.0 | -2.4491574276 | -1.4638111790 | -5.8290897482 |
| C | 6.0 | -5.1363588580 | -2.1529920450 | -6.2342105902 |
| H | 1.0 | -6.1770593023 | -2.4216955193 | -6.3888336210 |
| C | 6.0 | -3.4005997698 | -1.2136979666 | -4.8330421232 |
| C | 6.0 | -4.7359325301 | -1.5606213854 | -5.0344017542 |
| H | 1.0 | -3.0853276431 | -0.7521540520 | -3.9023285420 |
| H | 1.0 | -0.0485545489 | -5.6432940596 | -4.4075165591 |
| H | 1.0 | -5.4661009537 | -1.3665920540 | -4.2541700524 |
| C | 6.0 | -0.3429441100 | -3.5207036234 | -4.4313794060 |
| O | 8.0 | -0.5606529418 | -1.1174520978 | -4.2790324804 |
| C | 6.0 | 0.0522269704  | -4.7194672511 | -3.8459891498 |
| C | 6.0 | -0.2259912881 | -2.3077363344 | -3.7327299742 |
| C | 6.0 | 0.5665658772  | -4.7396450954 | -2.5550907247 |
| C | 6.0 | 0.2695245809  | -2.3077212269 | -2.3976753564 |
| H | 1.0 | 0.8871922346  | -5.6587391428 | -2.0802562737 |
| O | 8.0 | 0.0185219234  | 0.0426776793  | -2.0423415563 |
| C | 6.0 | 0.6685479326  | -3.5470527019 | -1.8367769713 |
| C | 6.0 | 0.3683667379  | -1.0682679558 | -1.5872402639 |
| H | 1.0 | 0.3172352259  | 1.0193988513  | -0.8499168249 |
| C | 6.0 | 1.2194941793  | -3.6271686720 | -0.4594374380 |
| O | 8.0 | 1.5987167131  | -4.7285639880 | -0.0027102204 |
| C | 6.0 | 0.8810741216  | -1.1654429453 | -0.2156159585 |
| H | 1.0 | -0.4584713917 | 5.5744201660  | -0.2737565781 |
| O | 8.0 | 0.6168438151  | 1.1930036896  | 0.0942693119  |
| C | 6.0 | 1.3036980700  | -2.4099301049 | 0.3290199337  |
| H | 1.0 | -2.5784682771 | 4.2697041865  | 0.7183315408  |
| C | 6.0 | 0.9632954742  | -0.0033888454 | 0.5754536014  |
| N | 7.0 | -0.0657023281 | 5.5290808963  | 0.6650776101  |
| H | 1.0 | -0.2596531450 | 3.4519329076  | 0.6239113284  |
| H | 1.0 | -0.5012323169 | 6.2942664560  | 1.1806661248  |
| C | 6.0 | -0.4836766204 | 4.2791981552  | 1.3050157359  |
| H | 1.0 | -4.4037195123 | 2.7073823303  | 1.9132987283  |
| H | 1.0 | 2.1134470734  | -4.3124083618 | 1.4794815776  |
| C | 6.0 | -1.9920934589 | 4.2281033348  | 1.6452595328  |
| C | 6.0 | 1.8248549066  | -2.4648697417 | 1.6314846478  |
| H | 1.0 | -2.0064507853 | 2.0771207773  | 1.8095760682  |
| C | 6.0 | 1.4519150677  | -0.0751645530 | 1.9178079717  |
| O | 8.0 | 2.2577067510  | -3.6096221334 | 2.1760916420  |
| O | 8.0 | -2.3749896814 | 5.3771943291  | 2.4073161335  |

|             |           |   |     |               |               |              |
|-------------|-----------|---|-----|---------------|---------------|--------------|
|             |           | C | 6.0 | -2.3185107089 | 2.9389627253  | 2.4103698080 |
|             |           | H | 1.0 | 2.0415701257  | 1.9496008149  | 2.1674020985 |
|             |           | C | 6.0 | 1.9061745133  | -1.2837769024 | 2.4239801229 |
|             |           | H | 1.0 | 5.2453819187  | -1.5294470364 | 2.5767348916 |
|             |           | C | 6.0 | -3.7789791635 | 2.7980377691  | 2.8074806818 |
|             |           | H | 1.0 | 1.3954352999  | 3.9788298086  | 2.3403205234 |
|             |           | C | 6.0 | 0.3354683180  | 4.0756725070  | 2.5899172755 |
|             |           | C | 6.0 | 1.4736656215  | 1.2067412953  | 2.7393358586 |
|             |           | H | 1.0 | 6.4498182984  | -0.2980431964 | 3.0080663514 |
|             |           | O | 8.0 | 0.1054527292  | 1.6143187978  | 2.8592433412 |
|             |           | H | 1.0 | -4.1155750159 | 3.6721700137  | 3.3703911966 |
|             |           | H | 1.0 | -3.9179340202 | 1.9053720338  | 3.4226116939 |
|             |           | H | 1.0 | -2.1406547369 | 5.1705654901  | 3.3251610573 |
|             |           | C | 6.0 | 5.5166319252  | -0.7695031045 | 3.3192451631 |
|             |           | H | 1.0 | 0.2521952624  | 4.9749883985  | 3.2141511137 |
|             |           | O | 8.0 | 4.5503392248  | 1.3763913046  | 2.8807478489 |
|             |           | C | 6.0 | -0.1568303041 | 2.8929199170  | 3.4348432542 |
|             |           | O | 8.0 | -1.5501109862 | 2.9522961694  | 3.6392788220 |
|             |           | C | 6.0 | 4.4264525302  | 0.2792688014  | 3.3950901945 |
|             |           | H | 1.0 | 3.2469012129  | -2.2036345876 | 3.8195401657 |
|             |           | C | 6.0 | 2.5214483681  | -1.3884137576 | 3.7986942390 |
|             |           | H | 1.0 | 5.6391446356  | -1.2750024092 | 4.2800830283 |
|             |           | C | 6.0 | 2.1102313345  | 1.0411467701  | 4.1366010035 |
|             |           | C | 6.0 | 3.1601607048  | -0.0656423256 | 4.2244296204 |
|             |           | H | 1.0 | 1.7609679751  | -1.6434513506 | 4.5479819008 |
|             |           | H | 1.0 | 0.2756638522  | 2.9423810694  | 4.4433993001 |
|             |           | H | 1.0 | 2.5552719045  | 1.9914986725  | 4.4491157448 |
|             |           | H | 1.0 | 1.3173602902  | 0.7813680450  | 4.8457951905 |
|             |           | O | 8.0 | 3.5954697225  | -0.2561345629 | 5.5785654780 |
|             |           | H | 1.0 | 3.8610816886  | 0.6070819961  | 5.9269625213 |
|             |           | C | 6.0 | 5.3755924936  | 2.6915009715  | 1.9463591201 |
|             |           | C | 6.0 | 4.6667848500  | 1.3374979602  | 1.8301486558 |
|             |           | C | 6.0 | 5.2893290137  | 0.1915664190  | 2.6622441454 |
|             |           | C | 6.0 | 4.8615781837  | 0.2235990982  | 4.1577129908 |
|             |           | C | 6.0 | 3.3210447764  | 0.3513929119  | 4.2359367445 |
|             |           | C | 6.0 | 2.8537726195  | 1.5728607942  | 3.4341369859 |
|             |           | O | 8.0 | 3.2591999212  | 1.4322961261  | 2.0696335083 |
|             |           | O | 8.0 | 1.4575118869  | 1.6025123129  | 3.4414746323 |
|             |           | C | 6.0 | 0.8598340150  | 2.7904199442  | 2.8837957467 |
|             |           | C | 6.0 | 0.2720594280  | 2.4202564265  | 1.5193755413 |
|             |           | C | 6.0 | -0.7932387953 | 3.4053030884  | 1.0450575336 |
|             |           | C | 6.0 | -1.9770979152 | 3.3348163304  | 2.0612645549 |
|             |           | C | 6.0 | -1.5128018450 | 3.5391177492  | 3.5058434615 |
| Nogalamycin | 1404-15-5 | C | 6.0 | 5.3755924936  | 2.6915009715  | 1.9463591201 |
|             |           | C | 6.0 | 4.6667848500  | 1.3374979602  | 1.8301486558 |
|             |           | C | 6.0 | 5.2893290137  | 0.1915664190  | 2.6622441454 |
|             |           | C | 6.0 | 4.8615781837  | 0.2235990982  | 4.1577129908 |
|             |           | C | 6.0 | 3.3210447764  | 0.3513929119  | 4.2359367445 |
|             |           | C | 6.0 | 2.8537726195  | 1.5728607942  | 3.4341369859 |
|             |           | O | 8.0 | 3.2591999212  | 1.4322961261  | 2.0696335083 |
|             |           | O | 8.0 | 1.4575118869  | 1.6025123129  | 3.4414746323 |
|             |           | C | 6.0 | 0.8598340150  | 2.7904199442  | 2.8837957467 |
|             |           | C | 6.0 | 0.2720594280  | 2.4202564265  | 1.5193755413 |
|             |           | C | 6.0 | -0.7932387953 | 3.4053030884  | 1.0450575336 |
|             |           | C | 6.0 | -1.9770979152 | 3.3348163304  | 2.0612645549 |
|             |           | C | 6.0 | -1.5128018450 | 3.5391177492  | 3.5058434615 |

|   |     |               |               |               |
|---|-----|---------------|---------------|---------------|
| C | 6.0 | -0.1797615981 | 3.3153446872  | 3.8605783726  |
| C | 6.0 | 0.2325524751  | 3.6158219155  | 5.1842974310  |
| C | 6.0 | -0.7061232710 | 4.0442129998  | 6.1576185836  |
| C | 6.0 | -2.0609176160 | 4.1889978019  | 5.7830030867  |
| C | 6.0 | -2.4476908081 | 3.9449198349  | 4.4765472077  |
| C | 6.0 | -3.1018073230 | 4.5905906504  | 6.7753418389  |
| O | 8.0 | -4.2931312613 | 4.5150149287  | 6.4770471995  |
| C | 6.0 | -2.6292103007 | 5.0225517505  | 8.1180075079  |
| C | 6.0 | -3.5145259235 | 5.5646915469  | 9.0594194209  |
| C | 6.0 | -3.1178964686 | 5.7499708666  | 10.4106497763 |
| C | 6.0 | -1.8159705542 | 5.4668592078  | 10.7749890770 |
| C | 6.0 | -0.8684834906 | 5.0254037502  | 9.8314230762  |
| C | 6.0 | -1.2732905423 | 4.7864038387  | 8.4985401910  |
| C | 6.0 | -0.2891080639 | 4.3183103863  | 7.5234557121  |
| O | 8.0 | 0.9207629425  | 4.1602361965  | 7.8683759276  |
| O | 8.0 | 0.3833274303  | 4.8326619157  | 10.2658029093 |
| C | 6.0 | -4.1734632366 | 6.1830243642  | 11.4192212867 |
| C | 6.0 | -4.8897437783 | 4.9620408251  | 12.0564626855 |
| C | 6.0 | -5.5319047028 | 4.0715104416  | 10.9724539648 |
| C | 6.0 | -6.4473805354 | 4.9154062749  | 10.0594694322 |
| C | 6.0 | -5.7426733974 | 6.2258431422  | 9.6488638276  |
| O | 8.0 | -4.7624519367 | 5.9130098552  | 8.6465306977  |
| O | 8.0 | -5.1962510206 | 6.9334562913  | 10.7178498897 |
| O | 8.0 | -6.8884836957 | 4.2209868494  | 8.9074775189  |
| N | 7.0 | -6.1145362349 | 2.8813648102  | 11.6149341298 |
| C | 6.0 | -7.4102636815 | 3.0888007527  | 12.2616968454 |
| C | 6.0 | -6.1445536615 | 1.6954295189  | 10.7537688715 |
| O | 8.0 | -3.9836537854 | 4.2098980014  | 12.8303169168 |
| C | 6.0 | -3.6410835683 | 7.1246283810  | 12.4936785786 |
| O | 8.0 | 1.5305037410  | 3.4942025846  | 5.4719897315  |
| C | 6.0 | -3.0524558293 | 4.3511687448  | 1.6947272453  |
| O | 8.0 | -2.8357760576 | 5.4890930549  | 1.3141464969  |
| O | 8.0 | -4.2908871063 | 3.8479757029  | 1.8242852904  |
| C | 6.0 | -5.3719652839 | 4.7504270640  | 1.5076647171  |
| C | 6.0 | -1.2679774828 | 3.0598848340  | -0.3743117490 |
| O | 8.0 | -0.1852077135 | 4.6930503404  | 1.0666894505  |
| O | 8.0 | 2.9510720060  | 0.4299290370  | 5.6003463368  |
| C | 6.0 | 1.7141106100  | -0.1869028867 | 5.9193749857  |
| C | 6.0 | 5.3229605379  | -1.0299020781 | 4.9065421587  |
| O | 8.0 | 5.3659561547  | 1.4342409070  | 4.7493119244  |
| C | 6.0 | 6.7129780512  | 1.4579242860  | 5.1834233347  |
| O | 8.0 | 4.8855278789  | -1.0748646619 | 2.1419074151  |
| C | 6.0 | 5.6646044700  | -1.5464463286 | 1.0615765759  |
| H | 1.0 | 4.7230946989  | 1.0251741879  | 0.7809409430  |

|   |     |               |               |               |
|---|-----|---------------|---------------|---------------|
| H | 1.0 | 6.3872936665  | 0.2720989350  | 2.6138949149  |
| H | 1.0 | 2.8868429447  | -0.5354251803 | 3.7538234221  |
| H | 1.0 | 3.2570087428  | 2.4932327641  | 3.8724828772  |
| H | 1.0 | 1.6316376882  | 3.5573944936  | 2.7598523035  |
| H | 1.0 | -2.4384473874 | 2.3430743081  | 1.9842739776  |
| H | 1.0 | -5.6803885014 | 5.3975776709  | 12.6918251749 |
| H | 1.0 | -4.7108392480 | 3.6879478574  | 10.3569255222 |
| H | 1.0 | -7.3487366595 | 5.2031091967  | 10.6126781117 |
| H | 1.0 | 6.4179212966  | 2.6034215639  | 1.6192976572  |
| H | 1.0 | 4.8773793426  | 3.4167623435  | 1.2965695090  |
| H | 1.0 | 5.3728430295  | 3.0683416557  | 2.9690806190  |
| H | 1.0 | 1.0878075044  | 2.3631613360  | 0.7950772073  |
| H | 1.0 | -0.1630844590 | 1.4179872799  | 1.5975319744  |
| H | 1.0 | -3.4952491374 | 4.0646761275  | 4.2280126477  |
| H | 1.0 | -1.4842986001 | 5.5790367779  | 11.7995220925 |
| H | 1.0 | 0.9100737204  | 4.5329919851  | 9.4812510705  |
| H | 1.0 | -6.4440570426 | 6.8918722864  | 9.1427092280  |
| H | 1.0 | -6.1650195251 | 4.2476183214  | 8.2566491524  |
| H | 1.0 | -8.2437350675 | 3.1893535630  | 11.5474397025 |
| H | 1.0 | -7.6258596543 | 2.2334541433  | 12.9098925889 |
| H | 1.0 | -7.3874558408 | 3.9823313432  | 12.8912608834 |
| H | 1.0 | -5.1558039234 | 1.5342588409  | 10.3146505687 |
| H | 1.0 | -6.3903050786 | 0.8187091047  | 11.3627308379 |
| H | 1.0 | -6.8760306817 | 1.7760802771  | 9.9373670132  |
| H | 1.0 | -4.3931203186 | 3.3252476676  | 12.8689950011 |
| H | 1.0 | -3.1148748879 | 7.9687378687  | 12.0419634211 |
| H | 1.0 | -4.4829282259 | 7.5073732514  | 13.0766558652 |
| H | 1.0 | -2.9696460428 | 6.5934865243  | 13.1700917449 |
| H | 1.0 | 1.6412410112  | 3.6991947423  | 6.4343801118  |
| H | 1.0 | -6.2840619020 | 4.1841014557  | 1.6893542565  |
| H | 1.0 | -5.3318241479 | 5.6320979324  | 2.1503759742  |
| H | 1.0 | -5.3099345174 | 5.0646828912  | 0.4636697537  |
| H | 1.0 | -1.7080071501 | 2.0580160630  | -0.4234608772 |
| H | 1.0 | -2.0105474484 | 3.7818395080  | -0.7286513365 |
| H | 1.0 | -0.4146091536 | 3.0976696088  | -1.0563603462 |
| H | 1.0 | -0.9038431655 | 5.3431053458  | 0.9806467320  |
| H | 1.0 | 1.5743727726  | -0.0637722231 | 6.9967487121  |
| H | 1.0 | 0.8771945946  | 0.2762368420  | 5.3880040480  |
| H | 1.0 | 1.7296488557  | -1.2634928213 | 5.6877896651  |
| H | 1.0 | 6.4019860917  | -1.1835912644 | 4.8114530978  |
| H | 1.0 | 5.0633664424  | -0.9374912347 | 5.9628028461  |
| H | 1.0 | 4.8283112477  | -1.9090574939 | 4.4920055464  |
| H | 1.0 | 6.9162317225  | 2.4893485417  | 5.4817807249  |
| H | 1.0 | 6.8838977609  | 0.8060107504  | 6.0488498296  |



|             |            |   |     |               |               |               |
|-------------|------------|---|-----|---------------|---------------|---------------|
|             |            | H | 1.0 | 7.4265137341  | 1.1822316548  | 4.3931958460  |
|             |            | H | 1.0 | 5.2450486258  | -2.5095917198 | 0.7617003018  |
|             |            | H | 1.0 | 5.6378076211  | -0.8728791959 | 0.1925084659  |
|             |            | H | 1.0 | 6.7166913027  | -1.6908025396 | 1.3532323916  |
| Pirarubicin | 72496-41-4 | H | 1.0 | 3.3374727201  | 3.4481079269  | -2.5831414204 |
|             |            | H | 1.0 | 3.8464905902  | 1.6673764941  | -0.8968077248 |
|             |            | O | 8.0 | 4.5515006844  | 4.0754944832  | -0.3942812922 |
|             |            | O | 8.0 | 0.8187877122  | 4.6346038842  | -3.7974909395 |
|             |            | H | 1.0 | 0.0674843808  | 4.8371589054  | -4.4244729939 |
|             |            | C | 6.0 | 2.6061118100  | 3.8316387867  | -1.8605933213 |
|             |            | H | 1.0 | -3.5737892985 | 4.2788383980  | -5.9810675272 |
|             |            | H | 1.0 | 3.0862294313  | -2.2763597864 | -0.9262667639 |
|             |            | H | 1.0 | 2.4715769573  | 4.8958581045  | -2.0703378463 |
|             |            | H | 1.0 | -5.8726511604 | 3.3318885602  | -6.3148244533 |
|             |            | H | 1.0 | 4.5846923831  | 4.9769922672  | -0.7472789334 |
|             |            | C | 6.0 | 0.3873989564  | 3.6277681721  | -3.0275399743 |
|             |            | C | 6.0 | 3.2118314829  | 2.1389524073  | -0.1392368396 |
|             |            | O | 8.0 | -1.4310274154 | 4.5092177202  | -4.9676795455 |
|             |            | C | 6.0 | -3.9514795308 | 3.4764961900  | -5.3593613186 |
|             |            | C | 6.0 | 1.2763326116  | 3.1352243078  | -2.0293117706 |
|             |            | H | 1.0 | 1.8533108319  | -4.7729789915 | 0.3695946799  |
|             |            | C | 6.0 | 3.1868517254  | 3.6312925002  | -0.4608690248 |
|             |            | C | 6.0 | -5.2225809458 | 2.9454633632  | -5.5355752722 |
|             |            | H | 1.0 | 3.6885551027  | 1.9654868133  | 0.8295868318  |
|             |            | C | 6.0 | -1.7759742169 | 3.5743790322  | -4.2108276168 |
|             |            | C | 6.0 | -0.8859525689 | 3.0582070848  | -3.1861502168 |
|             |            | C | 6.0 | -3.1263104241 | 2.9686762924  | -4.3528371941 |
|             |            | O | 8.0 | 1.9823714195  | 0.0785302681  | -0.5355694866 |
|             |            | C | 6.0 | 0.8966115688  | 2.0677800350  | -1.2315533496 |
|             |            | C | 6.0 | 2.4448898793  | -2.1868691689 | -0.0420732922 |
|             |            | H | 1.0 | 1.4136845013  | -2.4028317214 | -0.3403736466 |
|             |            | C | 6.0 | -5.6767825620 | 1.9145142890  | -4.7173026087 |
|             |            | C | 6.0 | 1.8273767661  | 1.4667995007  | -0.1917154983 |
|             |            | H | 1.0 | -6.6705944337 | 1.5148705692  | -4.8725757399 |
|             |            | C | 6.0 | -1.3055892436 | 2.0011792623  | -2.3301487683 |
|             |            | C | 6.0 | -3.5548623443 | 1.9219627874  | -3.5003395496 |
|             |            | H | 1.0 | -6.6927615172 | -0.6070445940 | -4.0543664382 |
|             |            | N | 7.0 | 2.8053871383  | -4.5859920293 | 0.6793882361  |
|             |            | C | 6.0 | -0.4203998519 | 1.5173463302  | -1.3473322254 |
|             |            | C | 6.0 | -4.8623761228 | 1.3926681552  | -3.6992055945 |
|             |            | H | 1.0 | 3.5096301856  | -0.4673944860 | 0.7511846853  |
|             |            | C | 6.0 | 2.4733742301  | -0.7550764379 | 0.4761115781  |
|             |            | C | 6.0 | -2.6460995220 | 1.4166610138  | -2.4387461683 |

|   |     |               |               |               |
|---|-----|---------------|---------------|---------------|
| H | 1.0 | 3.9385586575  | -2.9686163842 | 1.3110837231  |
| C | 6.0 | 2.8884504468  | -3.1716275196 | 1.0563048800  |
| C | 6.0 | 2.4450856428  | 4.4869883472  | 0.5915303745  |
| H | 1.0 | 3.4021960125  | -4.7588234354 | -0.1270257893 |
| O | 8.0 | -5.2715651295 | 0.3933174884  | -2.8899092718 |
| H | 1.0 | 3.7874510066  | 4.1438802124  | 2.2250673556  |
| H | 1.0 | 1.3300671458  | 1.5205688730  | 0.7833979379  |
| C | 6.0 | -6.5711855496 | -0.1560938180 | -3.0618842282 |
| O | 8.0 | -2.9996114882 | 0.5151098732  | -1.6497758627 |
| O | 8.0 | -0.7738472226 | 0.5677264723  | -0.4843133771 |
| O | 8.0 | 1.7374268955  | 5.4291012482  | 0.2739819333  |
| H | 1.0 | -0.9805380985 | -5.1999636442 | 1.2744527646  |
| H | 1.0 | -1.7160334569 | 0.3254114266  | -0.7239314693 |
| H | 1.0 | -6.6612348314 | -0.9310288431 | -2.3005104663 |
| C | 6.0 | 2.7025538623  | 4.2279264632  | 2.0704697544  |
| H | 1.0 | 1.6370291834  | 5.7945129154  | 2.2534058443  |
| H | 1.0 | -7.3532605905 | 0.5970245080  | -2.9064090785 |
| O | 8.0 | 1.6579974339  | -0.6282478290 | 1.6276364010  |
| H | 1.0 | 1.0590711639  | -5.3086019617 | 2.7165075372  |
| O | 8.0 | 2.1596700918  | 5.2456960210  | 2.8649418792  |
| C | 6.0 | 2.0744497242  | -2.9326508244 | 2.3413994182  |
| O | 8.0 | 0.7205823340  | -3.3619700398 | 2.1262058260  |
| H | 1.0 | -0.9900965869 | -6.9894257710 | 2.9841480588  |
| H | 1.0 | 2.2700024644  | 3.2447474357  | 2.3259290020  |
| C | 6.0 | -1.0511581442 | -4.9248318121 | 2.3324352795  |
| H | 1.0 | 3.1543745243  | -1.1938983233 | 2.9445569382  |
| C | 6.0 | 0.3207418753  | -4.4947630581 | 2.8401929898  |
| C | 6.0 | 2.0988407106  | -1.4392469700 | 2.7212495941  |
| H | 1.0 | 2.5143967415  | -3.5088794754 | 3.1624956386  |
| H | 1.0 | -2.6179784698 | -6.3322623262 | 2.8754175364  |
| C | 6.0 | -1.5928282656 | -6.0905837505 | 3.1757827214  |
| H | 1.0 | -1.7128685538 | -4.0542638203 | 2.4040357688  |
| H | 1.0 | 0.6008857134  | -6.0851369418 | 4.9269562210  |
| O | 8.0 | 0.2626675625  | -4.1556438885 | 4.2253393761  |
| C | 6.0 | 1.2302372840  | -1.0886953956 | 3.9176490157  |
| H | 1.0 | 0.1920632401  | -1.3537874235 | 3.7139542982  |
| C | 6.0 | -1.5283571468 | -5.7491301438 | 4.6721139071  |
| H | 1.0 | 1.2962005852  | -0.0167915867 | 4.1225351117  |
| C | 6.0 | -0.1255549111 | -5.2613519206 | 5.0382230452  |
| H | 1.0 | -1.7909400274 | -6.6198300172 | 5.2849628779  |
| H | 1.0 | 1.5546279793  | -1.6433160041 | 4.8017218909  |
| H | 1.0 | -2.2483084672 | -4.9549005800 | 4.9043773237  |
| H | 1.0 | -0.0765019222 | -4.9083009520 | 6.0720574223  |

|           |          |               |               |               |               |               |
|-----------|----------|---------------|---------------|---------------|---------------|---------------|
| Pyromycin | 668-17-7 | H             | 1.0           | 4.1865552180  | -0.4965417497 | -7.4982359136 |
|           |          | O             | 8.0           | 2.8116914367  | 1.4974323046  | -6.6733414505 |
|           |          | C             | 6.0           | 3.6437055852  | -0.7081720411 | -6.5832400718 |
|           |          | H             | 1.0           | 2.2081494898  | 2.0860804561  | -6.1404888155 |
|           |          | H             | 1.0           | 4.3303060534  | -2.7339323250 | -6.3873467427 |
|           |          | C             | 6.0           | 2.8455502464  | 0.3272198578  | -6.0320140577 |
|           |          | C             | 6.0           | 3.7226818866  | -1.9364470392 | -5.9732784951 |
|           |          | O             | 8.0           | 1.2298072845  | 2.2726989319  | -4.8283342893 |
|           |          | C             | 6.0           | 2.1285709779  | 0.0862303526  | -4.8451978457 |
|           |          | C             | 6.0           | 3.0097933030  | -2.2043307337 | -4.7770723117 |
|           |          | C             | 6.0           | 1.3082685642  | 1.1537367673  | -4.2799836529 |
|           |          | C             | 6.0           | 2.2105253978  | -1.1927159222 | -4.2098578292 |
|           |          | O             | 8.0           | 3.1387558836  | -3.4252925254 | -4.2452220921 |
|           |          | H             | 1.0           | -5.5285052951 | 2.8558735820  | -2.4452710088 |
|           |          | H             | 1.0           | 2.5818811502  | -3.4375661466 | -3.4262257125 |
|           |          | H             | 1.0           | -0.2798057394 | 2.8341694532  | -2.9731459631 |
|           |          | C             | 6.0           | 0.5618659367  | 0.8786158438  | -3.0276431022 |
|           |          | C             | 6.0           | 1.4732243769  | -1.4513396447 | -2.9821681873 |
|           |          | H             | 1.0           | -4.4793464353 | 2.3819825960  | -3.7980735057 |
|           |          | C             | 6.0           | -0.2261768922 | 1.8735359389  | -2.4719717700 |
|           |          | C             | 6.0           | -4.8400682803 | 2.0896740462  | -2.8094759793 |
|           |          | C             | 6.0           | 0.6532497329  | -0.3925584926 | -2.4065012807 |
|           |          | O             | 8.0           | 1.5427870378  | -2.5876818024 | -2.4172702382 |
|           |          | H             | 1.0           | -5.3328310059 | 1.1187933323  | -2.8499012666 |
|           |          | O             | 8.0           | -3.1850280257 | 4.0852005594  | -2.2712499323 |
|           |          | C             | 6.0           | -2.9700703052 | 3.0298140148  | -1.7184910526 |
|           |          | O             | 8.0           | -3.7365656497 | 1.9276333811  | -1.8994799674 |
|           |          | C             | 6.0           | -0.9423312991 | 1.6482973343  | -1.2809560282 |
|           |          | C             | 6.0           | -0.0674876495 | -0.6153401031 | -1.2084778940 |
|           |          | H             | 1.0           | -1.2316792756 | 3.7021985924  | -0.7701861937 |
|           |          | H             | 1.0           | 0.5611086155  | -2.3881022437 | -1.1200734105 |
|           |          | C             | 6.0           | -1.8141079524 | 2.7778107968  | -0.7491046522 |
|           |          | C             | 6.0           | -0.8611841864 | 0.4108044927  | -0.6418734319 |
|           |          | O             | 8.0           | -0.0335223044 | -1.7988891897 | -0.5818591707 |
|           |          | H             | 1.0           | -4.2603752185 | 3.3695219452  | 0.4974806127  |
|           |          | H             | 1.0           | -3.5301481748 | 0.8975811963  | 0.3426410862  |
| C         | 6.0      | -2.2514510069 | 2.5943266713  | 0.7450177058  |               |               |
| H         | 1.0      | -3.0291930483 | 4.5909817667  | 0.7853932732  |               |               |
| C         | 6.0      | -1.5442325197 | 0.1426287156  | 0.6803265481  |               |               |
| H         | 1.0      | -1.9351419832 | -0.8812706146 | 0.6756874496  |               |               |
| C         | 6.0      | -3.3704843897 | 3.5967454232  | 1.0968868361  |               |               |
| C         | 6.0      | -2.6734805655 | 1.1340687612  | 0.9808004473  |               |               |
| H         | 1.0      | 2.2985838869  | -3.5567228221 | 0.8063347588  |               |               |
| O         | 8.0      | -1.1254540155 | 2.9363166956  | 1.5503841105  |               |               |

|               |            |   |     |               |               |              |
|---------------|------------|---|-----|---------------|---------------|--------------|
|               |            | H | 1.0 | 4.0037532790  | -2.9437622774 | 2.7593102374 |
|               |            | H | 1.0 | -0.6710692175 | 2.1161798867  | 1.8080707917 |
|               |            | O | 8.0 | -0.4974881849 | 0.2336731660  | 1.6833879368 |
|               |            | H | 1.0 | 1.7846781847  | -1.4297004092 | 1.9417604174 |
|               |            | H | 1.0 | -2.9918914385 | 1.0057090440  | 2.0195969498 |
|               |            | C | 6.0 | 1.7115589288  | -4.0102912712 | 1.6294395526 |
|               |            | H | 1.0 | 2.0309166711  | -5.0516593220 | 1.7340784547 |
|               |            | H | 1.0 | 1.5710421369  | 0.7671694292  | 2.9423702542 |
|               |            | C | 6.0 | -3.7393012487 | 3.6354656483  | 2.5825283305 |
|               |            | H | 1.0 | 0.6624053002  | -4.0197906819 | 1.3254473541 |
|               |            | H | 1.0 | -0.5104970156 | -2.3796592205 | 1.8913201572 |
|               |            | C | 6.0 | 3.2552065779  | -3.4759391804 | 3.3787466533 |
|               |            | H | 1.0 | -4.4442661265 | 4.4494660594  | 2.7770899662 |
|               |            | H | 1.0 | -4.2160592726 | 2.7076919046  | 2.9161112995 |
|               |            | H | 1.0 | 3.5135668884  | -4.5390110906 | 3.3597417336 |
|               |            | C | 6.0 | 1.4022799266  | -1.9350784923 | 2.8504952812 |
|               |            | N | 7.0 | 1.8821536390  | -3.3254263581 | 2.9065238128 |
|               |            | C | 6.0 | -0.7194752617 | -0.5015404535 | 2.9000993770 |
|               |            | H | 1.0 | -2.8467855614 | 3.7977390310  | 3.1907312953 |
|               |            | C | 6.0 | -0.1387464342 | -1.9140094695 | 2.8055016561 |
|               |            | H | 1.0 | 3.3411833287  | -3.1362777259 | 4.4120685896 |
|               |            | H | 1.0 | 2.9668903496  | -0.9739703331 | 4.0164313691 |
|               |            | H | 1.0 | -1.7960929955 | -0.5439926114 | 3.1068533882 |
|               |            | C | 6.0 | 1.2774404851  | 0.3414909643  | 3.9100246892 |
|               |            | C | 6.0 | 1.8767970261  | -1.0678090536 | 4.0411524802 |
|               |            | O | 8.0 | -0.1681822449 | 0.2405356961  | 3.9540781980 |
|               |            | H | 1.0 | 2.7596142982  | 1.4621126107  | 5.0028067770 |
|               |            | H | 1.0 | 1.1650951003  | 2.2412047608  | 4.9216695827 |
|               |            | H | 1.0 | -0.5155826609 | -2.5048017850 | 3.6485370689 |
|               |            | C | 6.0 | 1.6803273428  | 1.2838970378  | 5.0317085729 |
|               |            | O | 8.0 | 1.5655732693  | -1.6372127573 | 5.3067036823 |
|               |            | H | 1.0 | 1.4305240489  | 0.8528322274  | 6.0036521456 |
|               |            | H | 1.0 | 0.6144902588  | -1.5172883904 | 5.4405196073 |
|               |            | H | 1.0 | -3.5730168710 | -2.5699024403 | 3.4702594334 |
|               |            | H | 1.0 | -1.9295136691 | -3.2467163553 | 3.4400146332 |
|               |            | C | 6.0 | -2.8738003675 | -3.1814836718 | 2.8947641206 |
|               |            | H | 1.0 | -3.2858413401 | -4.1748906452 | 2.7207880625 |
|               |            | O | 8.0 | -1.8769067891 | -0.7472270744 | 2.5805646151 |
|               |            | H | 1.0 | -2.9053579764 | 1.2951974242  | 1.5265424682 |
|               |            | O | 8.0 | -2.6617350712 | -2.6174477168 | 1.5887849946 |
|               |            | C | 6.0 | -2.1473972872 | -1.3730609554 | 1.5752550144 |
|               |            | H | 1.0 | -4.6164736237 | -0.6311017313 | 1.1228421736 |
|               |            | H | 1.0 | -1.3524242624 | 2.9141896502  | 0.7585339626 |
| Rhodomycinone | 21288-60-8 | H | 1.0 | -3.5730168710 | -2.5699024403 | 3.4702594334 |
|               |            | H | 1.0 | -1.9295136691 | -3.2467163553 | 3.4400146332 |
|               |            | C | 6.0 | -2.8738003675 | -3.1814836718 | 2.8947641206 |
|               |            | H | 1.0 | -3.2858413401 | -4.1748906452 | 2.7207880625 |
|               |            | O | 8.0 | -1.8769067891 | -0.7472270744 | 2.5805646151 |
|               |            | H | 1.0 | -2.9053579764 | 1.2951974242  | 1.5265424682 |
|               |            | O | 8.0 | -2.6617350712 | -2.6174477168 | 1.5887849946 |
|               |            | C | 6.0 | -2.1473972872 | -1.3730609554 | 1.5752550144 |
|               |            | H | 1.0 | -4.6164736237 | -0.6311017313 | 1.1228421736 |
|               |            | H | 1.0 | -1.3524242624 | 2.9141896502  | 0.7585339626 |

|   |     |               |               |               |
|---|-----|---------------|---------------|---------------|
| H | 1.0 | -3.7396503347 | 2.1637487831  | 0.2257516860  |
| C | 6.0 | -2.9248623130 | 1.4695325746  | 0.4470606440  |
| H | 1.0 | -5.8093902923 | 1.2770212500  | 0.0050485766  |
| H | 1.0 | -6.6360822261 | -0.2406627881 | -0.3432248944 |
| C | 6.0 | -1.6198197235 | 2.1407420280  | 0.0276849107  |
| C | 6.0 | -4.5156091664 | -0.4944593707 | 0.0393732865  |
| C | 6.0 | -5.7029933038 | 0.3099992854  | -0.4973353077 |
| O | 8.0 | 0.9030126837  | 3.0560482984  | -0.4681914826 |
| H | 1.0 | 1.8644438447  | 3.2702193881  | -0.6169392397 |
| C | 6.0 | -0.4566887359 | 1.1677606259  | -0.0800305360 |
| C | 6.0 | -1.9857443169 | -0.8485825346 | 0.1495553279  |
| C | 6.0 | -3.1395303731 | 0.1291783236  | -0.2715523956 |
| C | 6.0 | 0.8333771873  | 1.7179504944  | -0.3193476777 |
| C | 6.0 | -0.6229251231 | -0.2032018186 | -0.0048520522 |
| O | 8.0 | 3.4094344581  | 2.7277123695  | -0.7724554895 |
| H | 1.0 | 1.2118648145  | -2.8002874395 | -0.0363037683 |
| H | 1.0 | -4.5303937262 | -1.4967634596 | -0.4041711860 |
| C | 6.0 | 1.9625880154  | 0.8927500619  | -0.4073737185 |
| C | 6.0 | 0.5195125561  | -1.0563820396 | -0.0824539206 |
| C | 6.0 | 3.2764669252  | 1.4715231154  | -0.6393217067 |
| C | 6.0 | 1.8019969496  | -0.5188244449 | -0.2771487681 |
| O | 8.0 | 0.3127700039  | -2.3705868355 | 0.0406843498  |
| O | 8.0 | -1.8548142748 | 2.7684526057  | -1.2501347400 |
| H | 1.0 | -5.5822556869 | 0.4938150894  | -1.5672331354 |
| H | 1.0 | -2.0387602429 | -1.7057101825 | -0.5253402842 |
| H | 1.0 | 5.0699907620  | 2.8928051444  | -1.0055725653 |
| O | 8.0 | 2.8251419335  | -2.6490698045 | -0.2391943626 |
| H | 1.0 | -1.0376310491 | 3.2332544761  | -1.4870754130 |
| C | 6.0 | 2.9530212346  | -1.4112234830 | -0.3527438934 |
| C | 6.0 | 4.4377656877  | 0.5922793769  | -0.7143566413 |
| H | 1.0 | -2.6530031867 | 1.1392618588  | -1.8902110845 |
| O | 8.0 | -3.0549018160 | 0.2771813783  | -1.6884756948 |
| O | 8.0 | 5.9501158846  | 2.4456328665  | -1.0740454150 |
| C | 6.0 | 4.2936904084  | -0.8137266934 | -0.5731065797 |
| C | 6.0 | 5.7322540426  | 1.1340576035  | -0.9293841192 |
| C | 6.0 | 5.4024368759  | -1.6490799202 | -0.6424362935 |
| H | 1.0 | 5.2588658127  | -2.7171597741 | -0.5313415279 |
| C | 6.0 | 6.8421467979  | 0.2711690785  | -0.9952485625 |
| C | 6.0 | 6.6732887113  | -1.0972997790 | -0.8529743827 |
| H | 1.0 | 7.8195827901  | 0.7113214862  | -1.1599986793 |
| H | 1.0 | 7.5395433673  | -1.7497886081 | -0.9064382839 |

|             |            |               |               |               |               |               |
|-------------|------------|---------------|---------------|---------------|---------------|---------------|
| Steffimycin | 11033-34-4 | H             | 1.0           | 0.6452440786  | -1.4093226640 | -6.0584533401 |
|             |            | H             | 1.0           | -0.6421296466 | -0.1882621449 | -5.9497683846 |
|             |            | H             | 1.0           | 0.1655372008  | 1.9163791913  | -5.7328518094 |
|             |            | C             | 6.0           | -0.0753266652 | -0.9379597982 | -5.3857722381 |
|             |            | H             | 1.0           | -0.1865921805 | 3.4770427573  | -4.9639763859 |
|             |            | H             | 1.0           | -1.4241807219 | 2.2160165286  | -4.9880976866 |
|             |            | C             | 6.0           | -0.3495226983 | 2.4001007865  | -4.8996532361 |
|             |            | H             | 1.0           | -0.7516949537 | -1.6992888409 | -4.9874495815 |
|             |            | O             | 8.0           | 0.6909341331  | -0.3529925049 | -4.3302537048 |
|             |            | H             | 1.0           | 2.2709842180  | -4.2460053641 | -1.9320433936 |
|             |            | H             | 1.0           | 2.0076665396  | 1.4332986511  | -4.0736621271 |
|             |            | C             | 6.0           | 0.2062594180  | 1.8880294890  | -3.5725644694 |
|             |            | O             | 8.0           | 1.6191416780  | 2.1112202226  | -3.4971207006 |
|             |            | H             | 1.0           | -1.1139218980 | 0.1552294318  | -3.4072498867 |
|             |            | C             | 6.0           | -0.0423980043 | 0.3769820753  | -3.3409620451 |
|             |            | H             | 1.0           | 2.0211002893  | -5.9299896692 | -1.4215602591 |
|             |            | H             | 1.0           | 0.8514452354  | -2.5203968416 | -2.5318580787 |
|             |            | C             | 6.0           | 1.8069449297  | -4.8885297905 | -1.1716806563 |
|             |            | H             | 1.0           | 2.2541415008  | -4.6517016225 | -0.1956658237 |
|             |            | O             | 8.0           | -1.1091130803 | 3.6488351751  | -2.5588780927 |
|             |            | C             | 6.0           | -0.3915599694 | 2.6798669982  | -2.3941699913 |
|             |            | C             | 6.0           | -0.1030610501 | -2.5003410327 | -1.9968527053 |
|             |            | H             | 1.0           | 1.4906328342  | -0.4819693650 | -2.1106745680 |
|             |            | C             | 6.0           | 0.4646096473  | -0.1210973154 | -1.9652957941 |
|             |            | O             | 8.0           | 0.3954290220  | -4.7531496595 | -1.1436176207 |
|             |            | H             | 1.0           | 0.5812844574  | -3.0116961172 | -0.0182302699 |
|             |            | O             | 8.0           | -1.0643834747 | -2.8827153964 | -2.9538896734 |
|             |            | O             | 8.0           | -0.3549657295 | -1.1995313024 | -1.4891355769 |
|             |            | C             | 6.0           | -0.0713260791 | -3.4518396184 | -0.7818774600 |
|             |            | C             | 6.0           | 0.0051168355  | 2.2123874016  | -1.0331458480 |
|             |            | H             | 1.0           | -0.9483364811 | -5.3489764333 | 0.4855311103  |
|             |            | C             | 6.0           | 0.4744522564  | 0.9111296110  | -0.8556283134 |
|             |            | H             | 1.0           | -3.2781789407 | -2.5848770526 | -4.4040338821 |
|             |            | C             | 6.0           | -2.4182964400 | -3.0010518954 | -2.4617385619 |
|             |            | H             | 1.0           | -2.9472799647 | -4.3031774262 | -4.0999721891 |
|             |            | O             | 8.0           | -1.5040452450 | -4.6236095694 | 0.8139016219  |
|             |            | H             | 1.0           | -0.4671554670 | 4.1140277602  | -0.1254837063 |
|             |            | H             | 1.0           | -2.7367177668 | -2.0361609266 | -2.0450362407 |
|             |            | C             | 6.0           | -1.4814779877 | -3.6501474707 | -0.2249833756 |
|             |            | C             | 6.0           | -3.2966763088 | -3.3714551097 | -3.6441221495 |
| C           | 6.0        | -0.0725437060 | 3.1183690145  | 0.0367647810  |               |               |
| H           | 1.0        | -1.8253601352 | -2.7098634847 | 0.2180101080  |               |               |
| H           | 1.0        | -2.1195358707 | -5.0090096041 | -1.7662516223 |               |               |
| C           | 6.0        | -2.4498378296 | -4.0460692814 | -1.3429606703 |               |               |

|               |            |   |     |               |               |               |
|---------------|------------|---|-----|---------------|---------------|---------------|
|               |            | C | 6.0 | 0.9726936564  | 0.5366760766  | 0.4178045912  |
|               |            | O | 8.0 | 1.5183211033  | -0.6791554069 | 0.5522568735  |
|               |            | H | 1.0 | -4.3255163223 | -3.5113088674 | -3.3049700814 |
|               |            | C | 6.0 | 0.3685516041  | 2.7420448228  | 1.2937298223  |
|               |            | H | 1.0 | 1.8151251918  | -0.7495330435 | 1.4996063397  |
|               |            | C | 6.0 | 0.9157232156  | 1.4500308347  | 1.4999147160  |
|               |            | O | 8.0 | -3.7718781605 | -4.1380030940 | -0.8374783603 |
|               |            | H | 1.0 | -3.6911915411 | -4.6119900998 | 0.0043207610  |
|               |            | O | 8.0 | -0.1994958777 | 4.8385751673  | 2.2471501081  |
|               |            | C | 6.0 | 0.2763828485  | 3.7231988640  | 2.4149212617  |
|               |            | C | 6.0 | 1.4294064031  | 1.0604965977  | 2.8177790854  |
|               |            | O | 8.0 | 1.9405909548  | -0.0907352736 | 2.9832755775  |
|               |            | C | 6.0 | 0.7885913768  | 3.2901328638  | 3.7513365892  |
|               |            | C | 6.0 | 1.3476060548  | 1.9934553673  | 3.9213931546  |
|               |            | H | 1.0 | 0.2808470463  | 5.1606059765  | 4.6549847146  |
|               |            | C | 6.0 | 0.7090490524  | 4.1770673743  | 4.8046191022  |
|               |            | H | 1.0 | 2.3516354738  | -0.0691168450 | 4.6056804627  |
|               |            | C | 6.0 | 1.8286893898  | 1.6310812874  | 5.2093318996  |
|               |            | O | 8.0 | 2.3719157554  | 0.4356707332  | 5.4582302352  |
|               |            | C | 6.0 | 1.1889227914  | 3.7982630385  | 6.0783862865  |
|               |            | C | 6.0 | 1.7449697480  | 2.5369959688  | 6.2789759704  |
|               |            | O | 8.0 | 1.0630070754  | 4.7374455383  | 7.0410970431  |
|               |            | H | 1.0 | 2.1239511759  | 2.2125770133  | 7.2390228154  |
|               |            | C | 6.0 | 1.5193877905  | 4.4376656038  | 8.3576445920  |
|               |            | H | 1.0 | 2.5955506281  | 4.2300709389  | 8.3681521693  |
|               |            | H | 1.0 | 0.9784827935  | 3.5836570771  | 8.7812206640  |
|               |            | H | 1.0 | 1.3150760249  | 5.3283229292  | 8.9516727538  |
|               |            | H | 1.0 | -1.3776298036 | -5.8645557372 | -1.9659679170 |
|               |            | H | 1.0 | -1.9330585829 | -4.1948515430 | -2.2175573691 |
|               |            | H | 1.0 | -5.9843875763 | -1.3321786838 | -0.5727699038 |
|               |            | C | 6.0 | -1.1473505039 | -4.8156433715 | -1.7660933752 |
|               |            | H | 1.0 | -0.1881459082 | -4.5604638013 | -2.2388567327 |
|               |            | O | 8.0 | -1.0879826622 | -4.6677570191 | -0.3571388492 |
|               |            | C | 6.0 | -5.3038567950 | -0.8644752426 | 0.1428383309  |
|               |            | H | 1.0 | -2.4580019611 | -2.4294137651 | -0.8164986341 |
|               |            | H | 1.0 | -4.8908495557 | -1.6310999797 | 0.8044078589  |
|               |            | H | 1.0 | -5.8637402040 | -0.1244916030 | 0.7265670472  |
|               |            | O | 8.0 | -4.2639127310 | -0.2639977353 | -0.6322588587 |
|               |            | H | 1.0 | -3.9628049223 | -4.2706343822 | 2.9723153296  |
|               |            | H | 1.0 | -4.0107429165 | 1.5281967629  | -1.9526906959 |
|               |            | O | 8.0 | -2.8598468036 | -2.8237936837 | 1.0971130727  |
|               |            | H | 1.0 | -1.5806736805 | -4.9407643537 | 2.2678669296  |
|               |            | C | 6.0 | -1.9165136430 | -2.4168586605 | 0.1345220086  |
| Steffimycin B | NCI 204856 |   |     |               |               |               |

|   |     |               |               |               |
|---|-----|---------------|---------------|---------------|
| H | 1.0 | -2.0432583451 | -0.3918030292 | -1.4439275260 |
| C | 6.0 | -0.7062031386 | -3.3642436815 | 0.0926933997  |
| H | 1.0 | -5.6615086735 | 1.9868449542  | -0.0937628846 |
| H | 1.0 | 0.5748113611  | -5.2501967481 | 0.8769441489  |
| H | 1.0 | 0.0495807143  | -2.9379818026 | -0.5781034791 |
| H | 1.0 | -4.3058601649 | -2.5617904042 | 3.3064802221  |
| C | 6.0 | -3.5274037736 | -3.3298857787 | 3.3243369009  |
| O | 8.0 | -3.4281384519 | 2.2006460958  | -1.5638892529 |
| C | 6.0 | -3.2692594625 | 0.4641313492  | 0.0952864040  |
| C | 6.0 | -2.3550221076 | -2.9292456228 | 2.4440216731  |
| C | 6.0 | -1.1924915295 | -3.9378635680 | 2.5072309800  |
| C | 6.0 | -1.8958232324 | -0.0337134233 | -0.4172783053 |
| O | 8.0 | -1.4195979155 | -1.1143572778 | 0.3990690718  |
| C | 6.0 | -0.1008128441 | -3.5672713780 | 1.4877720159  |
| H | 1.0 | -3.1835332880 | -3.4605719408 | 4.3521050945  |
| O | 8.0 | 0.9373985463  | -4.5353792334 | 1.4241071925  |
| C | 6.0 | -4.8281643841 | 2.4848634260  | 0.4073412083  |
| H | 1.0 | -3.3298820102 | 0.2429593318  | 1.1673433079  |
| C | 6.0 | -3.5015444146 | 1.9751076594  | -0.1512036510 |
| O | 8.0 | 0.6176831406  | -0.5880688543 | -1.4803564333 |
| H | 1.0 | -4.9022815157 | 3.5587473517  | 0.2289155504  |
| H | 1.0 | -4.9062152471 | 2.3160425652  | 1.4852535113  |
| H | 1.0 | -1.9683884228 | -1.9510892946 | 2.7593469848  |
| H | 1.0 | 1.5636973023  | -0.6584799913 | -1.7808123218 |
| O | 8.0 | -0.7039779816 | -3.8946228298 | 3.8398094937  |
| C | 6.0 | -0.0713138109 | -5.0808469526 | 4.2992059666  |
| H | 1.0 | 0.3599335584  | -2.6299948358 | 1.8148966319  |
| C | 6.0 | -0.7862164788 | 0.9987376226  | -0.4271478459 |
| C | 6.0 | 0.4856710265  | 0.6256944380  | -0.9301519620 |
| C | 6.0 | -2.3224272666 | 2.7655289715  | 0.4467581466  |
| O | 8.0 | 3.0481406663  | 0.0017528850  | -1.9084405914 |
| C | 6.0 | -0.9622267369 | 2.2986158755  | 0.0467758065  |
| C | 6.0 | 1.5681007068  | 1.5387101067  | -0.8731875863 |
| H | 1.0 | 4.6724094170  | 0.0198635530  | -2.3132852152 |
| O | 8.0 | -2.4863900120 | 3.7324728807  | 1.1672846992  |
| C | 6.0 | 2.8849800065  | 1.1498640318  | -1.3899844573 |
| C | 6.0 | 0.1081182151  | 3.2040099927  | 0.1248857515  |
| O | 8.0 | 5.5262673504  | 0.5226658108  | -2.3288353252 |
| C | 6.0 | 1.3637968635  | 2.8288865372  | -0.3209742928 |
| H | 1.0 | -0.0529798893 | 4.1985112565  | 0.5228942037  |
| C | 6.0 | 3.9906072735  | 2.0801695729  | -1.3022791300 |
| C | 6.0 | 5.2787693637  | 1.7165441032  | -1.7816664099 |
| C | 6.0 | 2.4856663878  | 3.8091771840  | -0.2277606517 |
| C | 6.0 | 3.8223018237  | 3.3749742693  | -0.7384699400 |



|             |            |   |     |               |               |               |
|-------------|------------|---|-----|---------------|---------------|---------------|
|             |            | C | 6.0 | 6.3504885484  | 2.6194273082  | -1.6913342551 |
|             |            | H | 1.0 | 7.3108142270  | 2.2939469896  | -2.0686862698 |
|             |            | O | 8.0 | 2.3183985467  | 4.9246797535  | 0.2481313498  |
|             |            | C | 6.0 | 4.8774230051  | 4.2592978413  | -0.6534204102 |
|             |            | C | 6.0 | 6.1514404811  | 3.8791716060  | -1.1313772611 |
|             |            | H | 1.0 | 4.7290344562  | 5.2416565106  | -0.2220922481 |
|             |            | H | 1.0 | 8.4444067106  | 4.3096908130  | -2.5314904872 |
|             |            | O | 8.0 | 7.1162502493  | 4.8155915614  | -0.9993140109 |
|             |            | C | 6.0 | 8.4327221814  | 4.5142823629  | -1.4547541479 |
|             |            | H | 1.0 | 8.8539081233  | 3.6577850875  | -0.9158932936 |
|             |            | H | 1.0 | 9.0283886013  | 5.4030909083  | -1.2471516653 |
|             |            | H | 1.0 | 0.1148833496  | -4.9405014702 | 5.3672216274  |
|             |            | H | 1.0 | 0.8734801839  | -5.2670578132 | 3.7795641739  |
|             |            | H | 1.0 | -0.7253128311 | -5.9570346637 | 4.1694389122  |
|             |            | O | 8.0 | -7.6821437903 | -1.9537722787 | -2.9143273995 |
|             |            | H | 1.0 | -7.8589867580 | -2.4749533985 | -2.1119390247 |
|             |            | H | 1.0 | -6.3142032017 | -0.4169631185 | -3.0066732811 |
|             |            | H | 1.0 | -5.6878402731 | -1.9894013797 | -3.4943528960 |
|             |            | C | 6.0 | -6.3680580130 | -1.4914220151 | -2.7804790506 |
|             |            | C | 6.0 | -5.8216879895 | -1.7584074087 | -1.3863741981 |
|             |            | H | 1.0 | -5.4601564648 | 0.7767259894  | -1.2383223511 |
|             |            | H | 1.0 | -3.7184346011 | -0.7808716905 | -2.8896659374 |
|             |            | O | 8.0 | -6.4728901107 | -2.4633472126 | -0.6279635487 |
|             |            | C | 6.0 | -4.7314597081 | 0.3232821593  | -0.5525207783 |
|             |            | H | 1.0 | -3.2370954337 | -2.3402863910 | -2.2283697412 |
|             |            | C | 6.0 | -3.3905938825 | -1.2882231814 | -1.9741545403 |
|             |            | C | 6.0 | -4.4850010098 | -1.1699023514 | -0.9008691591 |
|             |            | H | 1.0 | -5.1980530642 | 0.3664437648  | 0.4361016744  |
|             |            | O | 8.0 | -4.8507788527 | 2.8783351475  | 0.3840080323  |
|             |            | H | 1.0 | -1.3990709506 | -0.6239582765 | -2.4283481991 |
|             |            | H | 1.0 | 6.8230393831  | -3.6957344634 | 0.0849986175  |
|             |            | C | 6.0 | -3.4964744620 | 1.1936425828  | -0.5692625598 |
|             |            | H | 1.0 | -4.8962345793 | -2.2985045353 | 0.5953442170  |
|             |            | H | 1.0 | 5.9408166058  | -2.5157819895 | -1.8853160748 |
|             |            | H | 1.0 | -4.7597026758 | 3.8277370412  | 0.6817631803  |
|             |            | H | 1.0 | -1.6873113325 | -3.2454718929 | -1.1651316301 |
|             |            | C | 6.0 | -2.0609067360 | -0.6398991840 | -1.5545967760 |
|             |            | O | 8.0 | -4.0841912114 | -1.8908091555 | 0.2466917952  |
|             |            | C | 6.0 | -3.6461191228 | 2.5251410652  | -0.0818840661 |
|             |            | O | 8.0 | 4.4738846297  | -3.7963647359 | -1.3849412211 |
|             |            | C | 6.0 | -2.2738373387 | 0.7810253295  | -1.0701823396 |
|             |            | H | 1.0 | 5.0286180457  | -5.3710351881 | 0.8890962475  |
|             |            | H | 1.0 | -0.1888492191 | -4.2460541336 | 0.4119107720  |
| Theprubicin | 95343-20-7 |   |     |               |               |               |

|   |     |               |               |               |
|---|-----|---------------|---------------|---------------|
| C | 6.0 | 5.2848512741  | -2.6719005878 | -1.0237380358 |
| O | 8.0 | 0.0972437029  | -2.6001898451 | -1.7676818651 |
| C | 6.0 | 6.0899852074  | -2.8962343046 | 0.2520166220  |
| H | 1.0 | 3.4956573444  | -5.4211254804 | -0.7988140071 |
| H | 1.0 | 2.5081470699  | -2.9705197433 | -2.8929900267 |
| O | 8.0 | -1.3936914612 | -1.3104920688 | -0.4811494542 |
| C | 6.0 | -0.8910937748 | -2.6098358989 | -0.7619166684 |
| O | 8.0 | -3.8338515992 | 5.1591066662  | 0.8567190594  |
| H | 1.0 | 6.6503204379  | -1.9850273574 | 0.4920033510  |
| C | 6.0 | -2.5625286255 | 3.4173580098  | -0.1041406719 |
| H | 1.0 | 1.6092995339  | -1.5599101259 | -3.5079948595 |
| C | 6.0 | -0.3789573563 | -3.1768933845 | 0.5573279115  |
| C | 6.0 | 3.6441130207  | -4.4081568753 | -0.4125582699 |
| C | 6.0 | -1.1699602689 | 1.6857965664  | -1.1099358814 |
| C | 6.0 | 4.3362520787  | -4.5225865556 | 0.9635106786  |
| C | 6.0 | -2.7377932145 | 4.7685781307  | 0.3976007580  |
| H | 1.0 | -1.1475007889 | -3.0627847721 | 1.3247109697  |
| C | 6.0 | 2.1845993411  | -1.9538933029 | -2.6658124078 |
| H | 1.0 | 4.6687996483  | -1.7680938973 | -0.9185005190 |
| O | 8.0 | 2.3071722707  | -3.9256958145 | -0.3813561248 |
| H | 1.0 | 5.7063122008  | -3.5158473040 | 2.3053059203  |
| C | 6.0 | 5.1453133467  | -3.2921307449 | 1.3909686774  |
| H | 1.0 | 1.6136087992  | -4.0454104691 | 2.1181112543  |
| C | 6.0 | -1.3074188971 | 3.0004044840  | -0.6300235561 |
| C | 6.0 | 1.3215111492  | -1.9249574078 | -1.4150784906 |
| O | 8.0 | -0.0229214747 | 1.2465914197  | -1.6382126896 |
| H | 1.0 | 3.5864683749  | -4.7958927735 | 1.7100516342  |
| H | 1.0 | -2.7543655219 | 7.2465686222  | 1.2455509697  |
| C | 6.0 | 1.9534838502  | -2.5541286491 | -0.1535386933 |
| H | 1.0 | 3.0720802896  | -1.3270384717 | -2.5373092500 |
| C | 6.0 | -1.5786476311 | 5.6994367493  | 0.3562031898  |
| C | 6.0 | 0.9195367533  | -2.4954663782 | 1.0031873580  |
| H | 1.0 | 1.0838983212  | -0.8838566504 | -1.1616803889 |
| H | 1.0 | 4.4817604728  | -2.4514374078 | 1.6303933254  |
| H | 1.0 | 0.6076860156  | 2.0275721042  | -1.5830197308 |
| N | 7.0 | 1.3489645473  | -3.0753013610 | 2.2745041179  |
| C | 6.0 | -1.7777608116 | 6.9887365090  | 0.8547502392  |
| C | 6.0 | -0.1611028882 | 3.9128482404  | -0.6901452523 |
| C | 6.0 | -0.3275721159 | 5.2934358402  | -0.1708595664 |
| H | 1.0 | 2.8318944888  | -1.9596502778 | 0.1235401943  |
| O | 8.0 | 0.9229334872  | 3.5184107201  | -1.1720446764 |
| H | 1.0 | 2.1766737945  | -2.5979621775 | 2.6253648018  |
| H | 1.0 | 0.7044531325  | -1.4350453050 | 1.1830373653  |
| C | 6.0 | -0.7289663146 | 7.8995176511  | 0.8370904118  |

|            |            |   |     |               |               |               |
|------------|------------|---|-----|---------------|---------------|---------------|
|            |            | H | 1.0 | -0.8720868757 | 8.9043984711  | 1.2227947437  |
|            |            | C | 6.0 | 0.7330910708  | 6.2443967775  | -0.1806880217 |
|            |            | C | 6.0 | 0.5137230338  | 7.5359342388  | 0.3258584345  |
|            |            | O | 8.0 | 1.9243181477  | 5.8600391419  | -0.6839716095 |
|            |            | H | 1.0 | 1.3164717423  | 8.2618391622  | 0.3213802707  |
|            |            | H | 1.0 | 2.7654484705  | 7.6639317327  | -1.3278329301 |
|            |            | C | 6.0 | 3.0021180923  | 6.7874444985  | -0.7126595036 |
|            |            | H | 1.0 | 3.8364068538  | 6.2474814693  | -1.1605497835 |
|            |            | H | 1.0 | 3.2816407170  | 7.1146783322  | 0.2960775675  |
|            |            | H | 1.0 | 8.2202185260  | 3.2395579621  | -2.0238190150 |
|            |            | C | 6.0 | 7.3708537087  | 2.5688021646  | -1.9361066990 |
|            |            | H | 1.0 | 8.4252270546  | 0.9280012747  | -2.8175746410 |
|            |            | H | 1.0 | 6.0639062357  | 4.0328920780  | -1.0179357366 |
|            |            | C | 6.0 | 7.4881989664  | 1.2572983434  | -2.3875465106 |
|            |            | C | 6.0 | 6.1809612996  | 3.0180202127  | -1.3774472153 |
|            |            | H | 1.0 | 8.5343231150  | -1.3306048283 | -2.5604599924 |
|            |            | H | 1.0 | 7.9748129987  | -0.8341657152 | -4.1873319945 |
|            |            | C | 6.0 | 7.7076347430  | -1.3871038719 | -3.2787702716 |
|            |            | C | 6.0 | 6.4089301609  | 0.3633525276  | -2.2903227745 |
|            |            | C | 6.0 | 5.0974010161  | 2.1431495102  | -1.2704541318 |
|            |            | O | 8.0 | 3.8011780270  | 3.8683712090  | -0.2858742661 |
|            |            | H | 1.0 | 7.5217201041  | -2.4304922486 | -3.5334205922 |
|            |            | O | 8.0 | 6.4902557026  | -0.9137784807 | -2.7156375411 |
|            |            | C | 6.0 | 5.1786812994  | 0.8028740934  | -1.7221081248 |
|            |            | C | 6.0 | 3.8512023685  | 2.6755829672  | -0.6606357788 |
|            |            | H | 1.0 | 2.2867353079  | 3.9723442856  | 0.2860117293  |
|            |            | C | 6.0 | 3.9989607300  | -0.0899517362 | -1.5960652981 |
|            |            | C | 6.0 | 2.7125638516  | 1.7857021664  | -0.5123086760 |
|            |            | O | 8.0 | 1.4058954742  | 3.5397083881  | 0.4790164057  |
|            |            | O | 8.0 | 4.0204847073  | -1.2666257799 | -2.0154255327 |
|            |            | C | 6.0 | 2.7854058330  | 0.4377393548  | -0.9617055958 |
|            |            | C | 6.0 | 1.5266725541  | 2.2717366620  | 0.0609073269  |
|            |            | C | 6.0 | 1.6659394677  | -0.4033860853 | -0.8077039426 |
|            |            | C | 6.0 | 0.4015953466  | 1.4133408777  | 0.2199748903  |
|            |            | H | 1.0 | 2.5716089534  | -1.7948133779 | -1.6603647856 |
|            |            | H | 1.0 | -0.9136706113 | 3.0600625848  | 0.5745905602  |
|            |            | H | 1.0 | -2.9581365355 | 7.0596212588  | 0.0150655525  |
|            |            | H | 1.0 | -0.8424328917 | 1.9252259253  | 1.9055377951  |
|            |            | H | 1.0 | -2.7599058269 | 5.6954062242  | 1.1328634262  |
|            |            | C | 6.0 | 0.4762657259  | 0.0891295856  | -0.1824554874 |
|            |            | O | 8.0 | 1.6654409623  | -1.6602485161 | -1.2506380515 |
|            |            | C | 6.0 | -0.8610344061 | 1.9948842377  | 0.8096479635  |
|            |            | C | 6.0 | -3.3125693569 | 6.0546900940  | 0.2577290158  |
| Valrubicin | 56124-62-0 |   |     |               |               |               |

|   |     |               |               |               |
|---|-----|---------------|---------------|---------------|
| H | 1.0 | -4.8032346575 | 8.0089767780  | 1.5426890854  |
| O | 8.0 | -2.7761020110 | 5.5446906208  | -2.0565221521 |
| H | 1.0 | -4.6119526513 | 6.6526263556  | 2.6409496587  |
| C | 6.0 | -2.9943552348 | 5.1757429107  | -0.9279609533 |
| H | 1.0 | -1.9490942353 | 3.2764166178  | -2.2714676456 |
| C | 6.0 | -5.1626290931 | 6.9932828613  | 1.7539966766  |
| O | 8.0 | -0.2098003542 | -1.9333334083 | 0.8412404539  |
| H | 1.0 | 0.8263730851  | -4.0749025913 | 1.5781596820  |
| O | 8.0 | -3.0169731782 | 3.8473286115  | -0.5811130073 |
| C | 6.0 | -0.6896466933 | -0.8686458276 | -0.0138994658 |
| C | 6.0 | -2.1247627555 | 1.2515234620  | 0.3420981129  |
| C | 6.0 | -4.8240545809 | 6.0816900500  | 0.5684707773  |
| C | 6.0 | -2.7754677101 | 2.9142051867  | -1.6515240851 |
| H | 1.0 | -0.4314781601 | -3.7580923009 | 2.7749368826  |
| H | 1.0 | -1.8762531472 | -0.3472013822 | 1.7015842526  |
| H | 1.0 | -3.3704684159 | 2.6164371633  | 0.9580897067  |
| H | 1.0 | -0.9227032588 | -1.2888664674 | -0.9949688070 |
| C | 6.0 | -2.4305626241 | 1.5087879246  | -1.1510766692 |
| C | 6.0 | -1.9473527560 | -0.2405459496 | 0.6143477936  |
| H | 1.0 | -5.3658307197 | 6.4208236584  | -0.3235123792 |
| C | 6.0 | -0.2542774840 | -4.0997255590 | 1.7524240255  |
| H | 1.0 | -6.8729941466 | 7.6879149294  | 2.9146028172  |
| H | 1.0 | 0.8873276260  | -5.1780579403 | -0.5896767410 |
| O | 8.0 | -3.2732073142 | 1.6605010331  | 1.0858541533  |
| H | 1.0 | -5.1716185581 | 5.0620241949  | 0.7764474365  |
| H | 1.0 | 0.8905679801  | -6.7716966733 | 1.8571630860  |
| C | 6.0 | -0.8985181064 | -3.1375784790 | 0.7566927148  |
| C | 6.0 | -6.6617423001 | 7.0328899906  | 2.0638542930  |
| O | 8.0 | -2.4272268283 | 0.6218614719  | -1.9816881988 |
| H | 1.0 | -3.6575148557 | 2.8440317785  | -2.2944665875 |
| O | 8.0 | 0.6406068199  | -7.8089231262 | 4.0818132944  |
| O | 8.0 | -0.7971945354 | -3.6451902770 | -0.5780818558 |
| H | 1.0 | -7.2341576725 | 7.4050855517  | 1.2070532924  |
| N | 7.0 | 0.0277836745  | -6.5011731404 | 2.3186086144  |
| H | 1.0 | -2.8426742325 | -0.7717769712 | 0.2830647158  |
| H | 1.0 | -7.0431071106 | 6.0354526915  | 2.3090174342  |
| O | 8.0 | 0.5903736974  | -6.0751785416 | -0.3641236900 |
| C | 6.0 | -0.1447984097 | -7.0449832025 | 3.5481563696  |
| H | 1.0 | -1.9749329301 | -3.0061306331 | 0.9792720245  |
| C | 6.0 | -0.7810756295 | -5.5380343221 | 1.5753158580  |
| F | 9.0 | -1.5686427251 | -5.3256564763 | 4.4483437020  |
| H | 1.0 | -0.5449573095 | -5.3400954603 | -2.6299380826 |
| C | 6.0 | -0.7548760970 | -5.9413427579 | 0.0842793904  |
| C | 6.0 | -1.4999461537 | -4.8829880130 | -0.7451900447 |

|                        |            |   |     |               |               |               |
|------------------------|------------|---|-----|---------------|---------------|---------------|
|                        |            | H | 1.0 | -1.8147082767 | -5.6005151902 | 1.9225844794  |
|                        |            | C | 6.0 | -1.4549226385 | -6.6682689249 | 4.2891352225  |
|                        |            | F | 9.0 | -1.4934516822 | -7.2312621883 | 5.4928488826  |
|                        |            | C | 6.0 | -1.5516798834 | -5.1909021266 | -2.2333443645 |
|                        |            | H | 1.0 | -2.0232733209 | -4.3644482905 | -2.7701130432 |
|                        |            | H | 1.0 | -2.5259685837 | -4.7806810871 | -0.3519116042 |
|                        |            | H | 1.0 | -1.2246178454 | -6.9241849382 | -0.0311288518 |
|                        |            | F | 9.0 | -2.5437920378 | -7.0812224077 | 3.5938889849  |
|                        |            | H | 1.0 | -2.1302046088 | -6.1023737182 | -2.4118672989 |
| Zorubicin / Rubidazone | 36508-71-1 | H | 1.0 | 8.5969652474  | 5.2086636079  | 1.2943412100  |
|                        |            | H | 1.0 | 9.2441517588  | 5.6140365242  | 3.6581389839  |
|                        |            | C | 6.0 | 8.0239030774  | 4.7606713613  | 2.1006746150  |
|                        |            | H | 1.0 | 6.6777069059  | 3.7559970489  | 0.7654722918  |
|                        |            | C | 6.0 | 8.3911455061  | 4.9822089114  | 3.4285974487  |
|                        |            | H | 1.0 | 2.8071160011  | 4.3835743764  | -0.4268388688 |
|                        |            | C | 6.0 | 6.9259051756  | 3.9526742967  | 1.8046259720  |
|                        |            | H | 1.0 | 3.9947632846  | 3.3527159446  | -1.2452965996 |
|                        |            | H | 1.0 | 2.3249068249  | 3.3797990732  | -1.8129003281 |
|                        |            | C | 6.0 | 2.9482275745  | 3.4128633610  | -0.9207634041 |
|                        |            | H | 1.0 | -3.3211884521 | 3.7345075360  | 0.1596457387  |
|                        |            | H | 1.0 | 4.5529450662  | 3.5468189858  | 0.8897162279  |
|                        |            | C | 6.0 | 7.6668689854  | 4.3801874664  | 4.4607787288  |
|                        |            | H | 1.0 | -0.0316788554 | 3.0601138049  | -0.6323764685 |
|                        |            | O | 8.0 | -2.3688980368 | 3.4340561123  | 0.1312905997  |
|                        |            | C | 6.0 | 6.1850060656  | 3.3587394704  | 2.8368362821  |
|                        |            | H | 1.0 | 7.9565528705  | 4.5424058233  | 5.4947297761  |
|                        |            | N | 7.0 | 4.3316056146  | 2.7060525371  | 1.4099922386  |
|                        |            | O | 8.0 | -4.9065770299 | 3.3659473494  | 0.2228285700  |
|                        |            | C | 6.0 | 6.5752653887  | 3.5677800073  | 4.1664037939  |
|                        |            | C | 6.0 | 2.6015400434  | 2.2682507705  | 0.0032861102  |
|                        |            | H | 1.0 | 0.8833061217  | 0.4448926100  | -1.9501104386 |
|                        |            | H | 1.0 | 0.2386679930  | 2.6711934193  | 1.0546315115  |
|                        |            | C | 6.0 | 4.9964353612  | 2.4667255686  | 2.6044485329  |
|                        |            | C | 6.0 | 0.1000725571  | 2.2241169710  | 0.0605194787  |
|                        |            | H | 1.0 | -7.2765647793 | 3.1590482629  | 0.2973255920  |
|                        |            | N | 7.0 | 3.2439297606  | 1.9544137698  | 1.0686185656  |
|                        |            | C | 6.0 | -2.4095224102 | 2.0954668190  | 0.1406332671  |
|                        |            | C | 6.0 | 1.3690656433  | 1.4289921031  | -0.3309739905 |
|                        |            | O | 8.0 | 1.4115223834  | 1.2371684795  | -1.7505881571 |
|                        |            | C | 6.0 | -4.8752505560 | 2.1151705257  | 0.2363939992  |
|                        |            | H | 1.0 | 6.0079173771  | 3.0781300921  | 4.9504644864  |
|                        |            | C | 6.0 | -1.1656277388 | 1.3993998924  | 0.0909899989  |
|                        |            | C | 6.0 | -7.3354214478 | 2.0778424235  | 0.3189143064  |

|   |     |               |               |               |
|---|-----|---------------|---------------|---------------|
| O | 8.0 | 4.6483737449  | 1.6194592929  | 3.4083880768  |
| C | 6.0 | -3.6201490084 | 1.3856003846  | 0.1966732605  |
| H | 1.0 | -9.4818387047 | 1.9678966588  | 0.3911781938  |
| C | 6.0 | -6.1462287838 | 1.3450705976  | 0.2931190126  |
| C | 6.0 | -8.5513007241 | 1.4086075837  | 0.3704020635  |
| H | 1.0 | 1.3566220321  | 0.2536764163  | 1.4860064311  |
| C | 6.0 | 1.3581926862  | 0.0806672432  | 0.4061512759  |
| C | 6.0 | -1.1589535475 | 0.0147364221  | 0.1108319764  |
| H | 1.0 | 2.2801193668  | -0.4657870546 | 0.1902617051  |
| C | 6.0 | -3.6145041519 | -0.0382643658 | 0.2206319294  |
| C | 6.0 | 0.1379942651  | -0.7621103518 | 0.0260811175  |
| C | 6.0 | -6.1475944005 | -0.0712045936 | 0.3188350943  |
| O | 8.0 | 0.2251761826  | -1.2153675122 | -1.3621904911 |
| C | 6.0 | -2.3833436046 | -0.7182262937 | 0.1817392449  |
| H | 1.0 | 1.6512688036  | -1.6881030637 | -3.5502207535 |
| C | 6.0 | -8.5908393640 | 0.0171258234  | 0.3960238338  |
| C | 6.0 | -4.8585685796 | -0.8096673526 | 0.2925128723  |
| C | 6.0 | -7.4060760210 | -0.7365395714 | 0.3705773438  |
| H | 1.0 | 0.0670263153  | -1.6515778611 | 0.6563563781  |
| H | 1.0 | -9.5491973319 | -0.4841954644 | 0.4363413466  |
| H | 1.0 | 2.0433539535  | -2.1838550667 | -1.1461845823 |
| C | 6.0 | 1.1510702724  | -2.5500258351 | -3.0917870863 |
| H | 1.0 | 0.1399073728  | -2.6173427815 | -3.5069263173 |
| C | 6.0 | 1.0402364346  | -2.3376436318 | -1.5861736225 |
| O | 8.0 | -2.3031242119 | -2.0477480044 | 0.2253034532  |
| H | 1.0 | 2.2717140325  | -3.3535770064 | -5.3336456217 |
| O | 8.0 | -4.8169345761 | -2.0577308608 | 0.3285578511  |
| O | 8.0 | -7.4092584546 | -2.0856975373 | 0.3925974249  |
| H | 1.0 | -3.2504486686 | -2.3700712438 | 0.2783332376  |
| H | 1.0 | 2.9487201024  | -3.7288374563 | -2.9704952647 |
| N | 7.0 | 1.9211238461  | -4.1519485456 | -4.8081042643 |
| C | 6.0 | 1.9252214381  | -3.8414129842 | -3.3746741441 |
| O | 8.0 | 0.4371589823  | -3.4539178699 | -0.9576853197 |
| H | 1.0 | -9.2659432354 | -2.5639706561 | -0.4435874466 |
| H | 1.0 | -9.2150286508 | -2.5414873305 | 1.3455321418  |
| C | 6.0 | -8.6488454533 | -2.7803375468 | 0.4369948104  |
| H | 1.0 | 2.5855399836  | -4.9056999732 | -4.9716900474 |
| H | 1.0 | 2.2006367038  | -4.5349274080 | -0.7145643162 |
| C | 6.0 | 1.1783582924  | -4.6697453974 | -1.1093496977 |
| C | 6.0 | 1.2853726701  | -5.0040316846 | -2.6054528229 |
| H | 1.0 | 0.2702849563  | -5.1601450354 | -2.9968498318 |
| H | 1.0 | -8.3876552556 | -3.8386298580 | 0.4430846816  |
| H | 1.0 | 1.7026460423  | -6.6956450025 | -3.4853267173 |
| O | 8.0 | 2.0719922946  | -6.1917618516 | -2.7508190424 |

|                  |  |   |      |                |               |               |
|------------------|--|---|------|----------------|---------------|---------------|
|                  |  | H | 1.0  | 0.4329823063   | -5.4677331712 | 0.7529092633  |
|                  |  | C | 6.0  | 0.4594928276   | -5.7400630996 | -0.3053112615 |
|                  |  | H | 1.0  | -0.5715738031  | -5.8469821967 | -0.6568089838 |
|                  |  | H | 1.0  | 0.9751947584   | -6.6961413419 | -0.4173897516 |
|                  |  | H | 1.0  | -6.5560770275  | 4.7115768901  | 6.2380159943  |
|                  |  | O | 8.0  | -6.8350000000  | 5.6340000000  | 6.2380000000  |
|                  |  | C | 6.0  | -6.3370000000  | 6.2240000000  | 5.0360000000  |
|                  |  | C | 6.0  | -7.1530000000  | 5.7650000000  | 3.8500000000  |
|                  |  | O | 8.0  | -6.2830000000  | 5.6140000000  | 2.7070000000  |
|                  |  | C | 6.0  | -7.8460000000  | 4.4140000000  | 4.0030000000  |
|                  |  | O | 8.0  | -9.0400000000  | 4.3900000000  | 3.2110000000  |
|                  |  | C | 6.0  | -6.8110000000  | 3.4360000000  | 3.4810000000  |
|                  |  | C | 6.0  | -6.0740000000  | 4.2370000000  | 2.4190000000  |
|                  |  | N | 7.0  | -4.6320000000  | 4.0120000000  | 2.3840000000  |
|                  |  | C | 6.0  | -3.8400000000  | 3.4100000000  | 3.3270000000  |
|                  |  | N | 7.0  | -2.5650000000  | 3.3960000000  | 3.0150000000  |
|                  |  | C | 6.0  | -2.5200000000  | 4.0280000000  | 1.7790000000  |
|                  |  | C | 6.0  | -1.4600000000  | 4.3360000000  | 0.9060000000  |
|                  |  | N | 7.0  | -0.1820000000  | 4.0460000000  | 1.1470000000  |
|                  |  | N | 7.0  | -1.7620000000  | 4.9660000000  | -0.2450000000 |
|                  |  | C | 6.0  | -3.0420000000  | 5.2600000000  | -0.5020000000 |
|                  |  | N | 7.0  | -4.1210000000  | 5.0240000000  | 0.2340000000  |
|                  |  | C | 6.0  | -3.7870000000  | 4.4000000000  | 1.3750000000  |
|                  |  | H | 1.0  | -5.2970000000  | 5.9330000000  | 4.8870000000  |
|                  |  | H | 1.0  | -6.3970000000  | 7.3100000000  | 5.1100000000  |
|                  |  | H | 1.0  | -7.9360000000  | 6.5020000000  | 3.6930000000  |
|                  |  | H | 1.0  | -8.0960000000  | 4.2170000000  | 5.0410000000  |
|                  |  | H | 1.0  | -6.1490000000  | 3.0970000000  | 4.2760000000  |
|                  |  | H | 1.0  | -7.2810000000  | 2.5530000000  | 3.0470000000  |
|                  |  | H | 1.0  | -6.4810000000  | 4.0360000000  | 1.4290000000  |
|                  |  | H | 1.0  | -4.2310000000  | 2.9900000000  | 4.2430000000  |
|                  |  | H | 1.0  | 0.5340000000   | 4.3030000000  | 0.4820000000  |
|                  |  | H | 1.0  | 0.0780000000   | 3.5770000000  | 1.9940000000  |
|                  |  | H | 1.0  | -3.2250000000  | 5.7670000000  | -1.4480000000 |
|                  |  | P | 15.0 | -9.8590000000  | 3.0180000000  | 3.0320000000  |
|                  |  | O | 8.0  | -11.2920000000 | 3.3760000000  | 2.8880000000  |
|                  |  | O | 8.0  | -9.4440000000  | 2.0700000000  | 4.0970000000  |
|                  |  | O | 8.0  | -9.3520000000  | 2.4480000000  | 1.6320000000  |
|                  |  | C | 6.0  | -9.1310000000  | 3.3160000000  | 0.5170000000  |
|                  |  | C | 6.0  | -8.7530000000  | 2.5120000000  | -0.7050000000 |
|                  |  | O | 8.0  | -7.3060000000  | 2.4820000000  | -0.8210000000 |
|                  |  | C | 6.0  | -9.1880000000  | 1.0490000000  | -0.6690000000 |
|                  |  | O | 8.0  | -9.4480000000  | 0.5780000000  | -1.9980000000 |
| AG-TC base pairs |  |   |      |                |               |               |

|   |     |                |               |               |
|---|-----|----------------|---------------|---------------|
| C | 6.0 | -7.9720000000  | 0.3700000000  | -0.0720000000 |
| C | 6.0 | -6.8600000000  | 1.1370000000  | -0.7540000000 |
| N | 7.0 | -5.5830000000  | 1.1080000000  | -0.0540000000 |
| C | 6.0 | -5.3740000000  | 0.7080000000  | 1.2370000000  |
| N | 7.0 | -4.1210000000  | 0.7520000000  | 1.5960000000  |
| C | 6.0 | -3.4600000000  | 1.2130000000  | 0.4650000000  |
| C | 6.0 | -2.0840000000  | 1.4530000000  | 0.2430000000  |
| O | 8.0 | -1.1430000000  | 1.3070000000  | 1.0290000000  |
| N | 7.0 | -1.8430000000  | 1.9090000000  | -1.0500000000 |
| C | 6.0 | -2.8100000000  | 2.1160000000  | -2.0050000000 |
| N | 7.0 | -2.3910000000  | 2.5650000000  | -3.2000000000 |
| N | 7.0 | -4.1000000000  | 1.9000000000  | -1.8070000000 |
| C | 6.0 | -4.3510000000  | 1.4480000000  | -0.5600000000 |
| H | 1.0 | -8.3240000000  | 4.0090000000  | 0.7490000000  |
| H | 1.0 | -10.0380000000 | 3.8820000000  | 0.3060000000  |
| H | 1.0 | -9.2440000000  | 2.9630000000  | -1.5660000000 |
| H | 1.0 | -10.0780000000 | 0.9140000000  | -0.0540000000 |
| H | 1.0 | -7.9490000000  | 0.4840000000  | 1.0120000000  |
| H | 1.0 | -7.9640000000  | -0.6930000000 | -0.2880000000 |
| H | 1.0 | -6.7070000000  | 0.7760000000  | -1.7680000000 |
| H | 1.0 | -6.1690000000  | 0.3730000000  | 1.8830000000  |
| H | 1.0 | -0.8790000000  | 2.0950000000  | -1.2860000000 |
| H | 1.0 | -1.4170000000  | 2.7470000000  | -3.4050000000 |
| H | 1.0 | -3.0790000000  | 2.7250000000  | -3.9210000000 |
| H | 1.0 | -10.1859538275 | 1.1011808790  | -2.3337575760 |
| O | 8.0 | 5.4980000000   | 1.2440000000  | -6.6360000000 |
| C | 6.0 | 4.1520000000   | 1.1020000000  | -7.1020000000 |
| C | 6.0 | 3.3930000000   | 2.3960000000  | -6.9180000000 |
| O | 8.0 | 2.5140000000   | 2.2470000000  | -5.7750000000 |
| C | 6.0 | 4.2630000000   | 3.6210000000  | -6.6190000000 |
| O | 8.0 | 3.7120000000   | 4.8170000000  | -7.1890000000 |
| C | 6.0 | 4.2030000000   | 3.7060000000  | -5.1080000000 |
| C | 6.0 | 2.7640000000   | 3.2960000000  | -4.8600000000 |
| N | 7.0 | 2.4430000000   | 2.8080000000  | -3.5050000000 |
| C | 6.0 | 1.0990000000   | 2.7330000000  | -3.1270000000 |
| O | 8.0 | 0.2240000000   | 3.0390000000  | -3.9500000000 |
| N | 7.0 | 0.7860000000   | 2.3330000000  | -1.8760000000 |
| C | 6.0 | 1.7550000000   | 2.0210000000  | -1.0150000000 |
| N | 7.0 | 1.3980000000   | 1.6740000000  | 0.2170000000  |
| C | 6.0 | 3.1300000000   | 2.0610000000  | -1.3790000000 |
| C | 6.0 | 3.4260000000   | 2.4480000000  | -2.6220000000 |
| H | 1.0 | 3.6530000000   | 0.3150000000  | -6.5370000000 |
| H | 1.0 | 4.1540000000   | 0.8380000000  | -8.1620000000 |
| H | 1.0 | 2.8590000000   | 2.6020000000  | -7.8460000000 |



|   |      |              |              |               |
|---|------|--------------|--------------|---------------|
| H | 1.0  | 5.281000000  | 3.482000000  | -6.982000000  |
| H | 1.0  | 4.915000000  | 3.020000000  | -4.652000000  |
| H | 1.0  | 4.435000000  | 4.713000000  | -4.753000000  |
| H | 1.0  | 2.083000000  | 4.114000000  | -5.101000000  |
| H | 1.0  | 0.419000000  | 1.718000000  | 0.454000000   |
| H | 1.0  | 2.091000000  | 1.431000000  | 0.911000000   |
| H | 1.0  | 3.912000000  | 1.783000000  | -0.673000000  |
| H | 1.0  | 4.467000000  | 2.462000000  | -2.935000000  |
| H | 1.0  | 6.0007987932 | 1.6049866582 | -7.3757594648 |
| P | 15.0 | 3.520000000  | 4.943000000  | -8.782000000  |
| O | 8.0  | 3.935000000  | 3.665000000  | -9.415000000  |
| O | 8.0  | 4.153000000  | 6.213000000  | -9.218000000  |
| O | 8.0  | 1.942000000  | 5.094000000  | -8.950000000  |
| C | 6.0  | 1.070000000  | 4.956000000  | -7.825000000  |
| C | 6.0  | 0.712000000  | 6.313000000  | -7.266000000  |
| O | 8.0  | 0.147000000  | 6.122000000  | -5.951000000  |
| C | 6.0  | 1.894000000  | 7.266000000  | -7.094000000  |
| O | 8.0  | 1.912000000  | 8.194000000  | -8.192000000  |
| C | 6.0  | 1.628000000  | 7.960000000  | -5.765000000  |
| C | 6.0  | 0.558000000  | 7.143000000  | -5.060000000  |
| N | 7.0  | 0.978000000  | 6.489000000  | -3.803000000  |
| C | 6.0  | -0.011000000 | 6.134000000  | -2.917000000  |
| O | 8.0  | -1.191000000 | 6.339000000  | -3.137000000  |
| N | 7.0  | 0.436000000  | 5.531000000  | -1.765000000  |
| C | 6.0  | 1.743000000  | 5.279000000  | -1.416000000  |
| O | 8.0  | 1.994000000  | 4.763000000  | -0.330000000  |
| C | 6.0  | 2.732000000  | 5.683000000  | -2.391000000  |
| C | 6.0  | 4.181000000  | 5.571000000  | -2.040000000  |
| C | 6.0  | 2.308000000  | 6.247000000  | -3.531000000  |
| H | 1.0  | 1.563000000  | 4.372000000  | -7.049000000  |
| H | 1.0  | 0.159000000  | 4.447000000  | -8.126000000  |
| H | 1.0  | 0.024000000  | 6.788000000  | -7.967000000  |
| H | 1.0  | 2.834000000  | 6.718000000  | -7.081000000  |
| H | 1.0  | 2.534000000  | 8.057000000  | -5.172000000  |
| H | 1.0  | 1.216000000  | 8.956000000  | -5.910000000  |
| H | 1.0  | -0.311000000 | 7.768000000  | -4.843000000  |
| H | 1.0  | -0.239000000 | 5.172000000  | -1.096000000  |
| H | 1.0  | 4.310000000  | 5.752000000  | -0.972000000  |
| H | 1.0  | 4.749000000  | 6.310000000  | -2.605000000  |
| H | 1.0  | 4.540000000  | 4.573000000  | -2.284000000  |
| H | 1.0  | 3.047000000  | 6.508000000  | -4.285000000  |
| H | 1.0  | 2.5782171538 | 7.8157226091 | -8.7999646631 |

6. Optimized 3D chemical structures of anthracyclines and 3D structure of AG-TC base pairs

| Name                              | NSC No. / CAS No. | 3D chemical structures |                                                                                                                                                                                                                                                                                                                                                                                                                                                                              |
|-----------------------------------|-------------------|------------------------|------------------------------------------------------------------------------------------------------------------------------------------------------------------------------------------------------------------------------------------------------------------------------------------------------------------------------------------------------------------------------------------------------------------------------------------------------------------------------|
| 3'-Acetoxy-4'-O-acetyldoxorubicin | 73113-92-5        |                        | 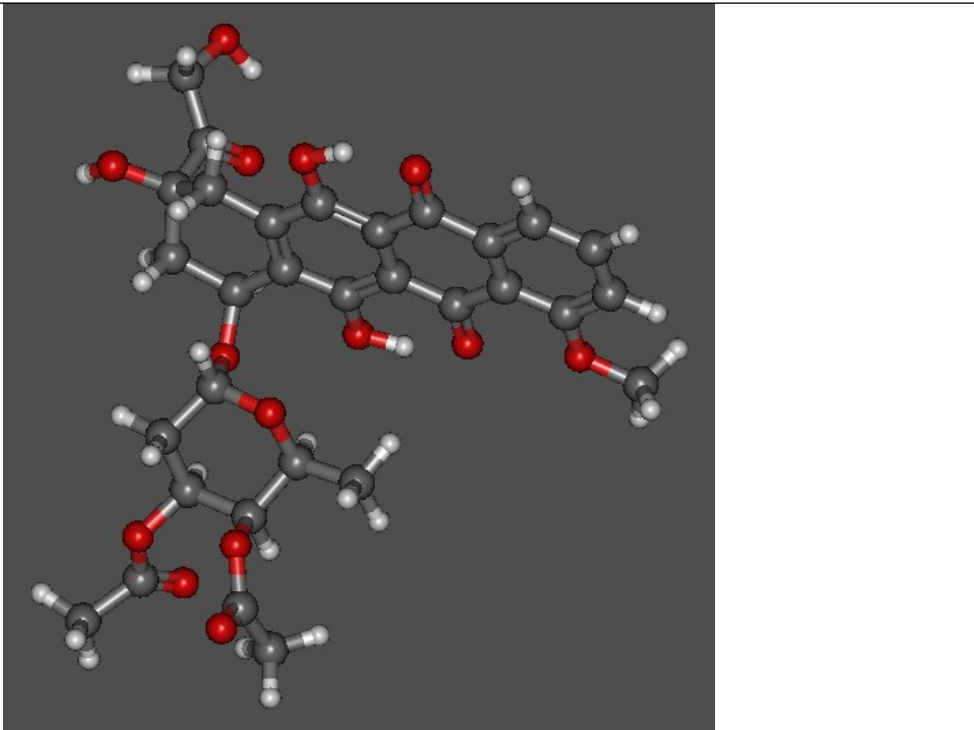 A 3D ball-and-stick model of the anthracycline derivative 3'-Acetoxy-4'-O-acetyldoxorubicin. The molecule is shown in a perspective view against a dark gray background. It features a complex polycyclic core with several hydroxyl groups and two acetoxy groups attached to the sugar moiety. The atoms are represented by spheres: carbon (gray), oxygen (red), and hydrogen (white). |

Aclacinomycin X

NSC 670120

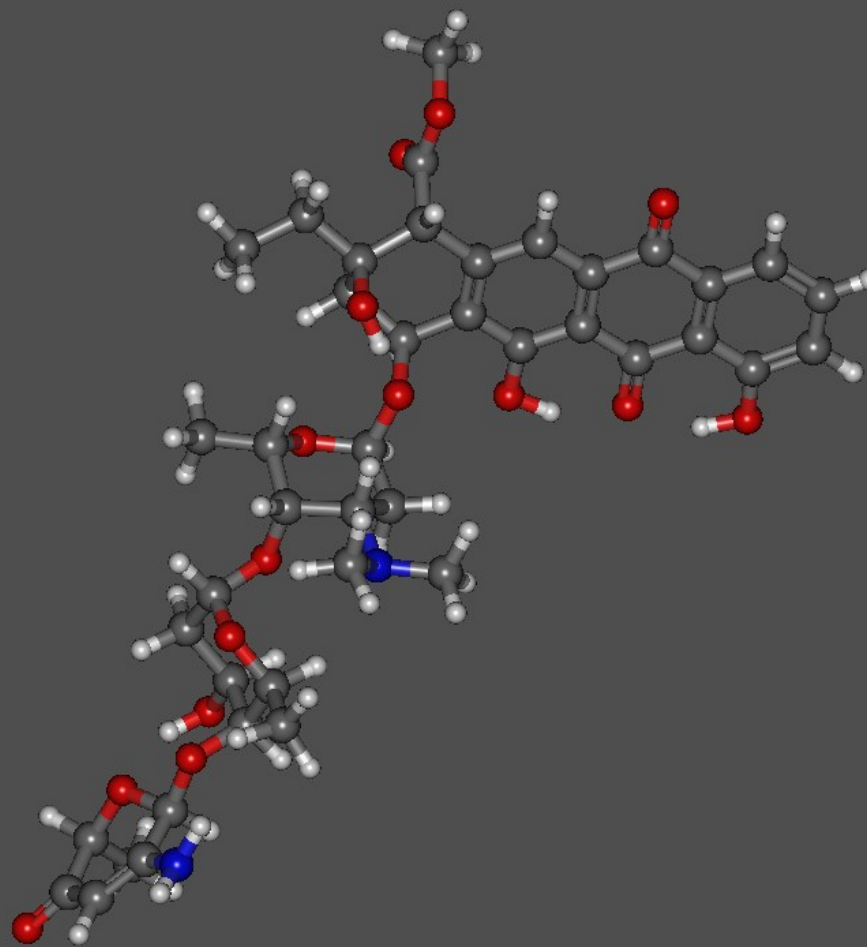

Aclarubicin

57576-44-0

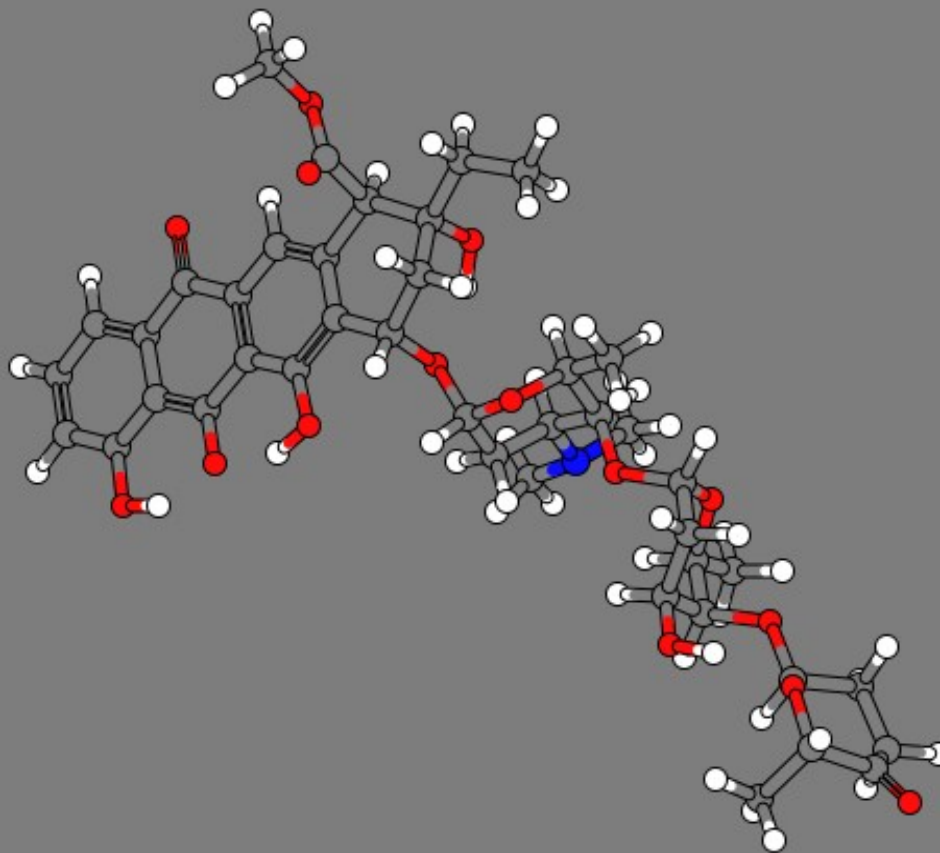

Adriamycin 14-octanoate

51898-39-6

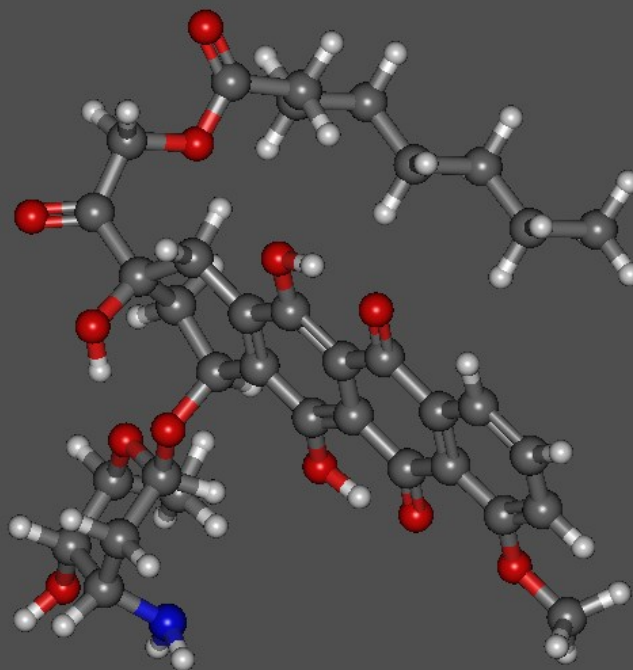

|                                     |                   |                                                                                                                                                                                                                                                                                                                                                                                                                                |
|-------------------------------------|-------------------|--------------------------------------------------------------------------------------------------------------------------------------------------------------------------------------------------------------------------------------------------------------------------------------------------------------------------------------------------------------------------------------------------------------------------------|
| <p>Aklavin</p>                      | <p>60504-57-6</p> | 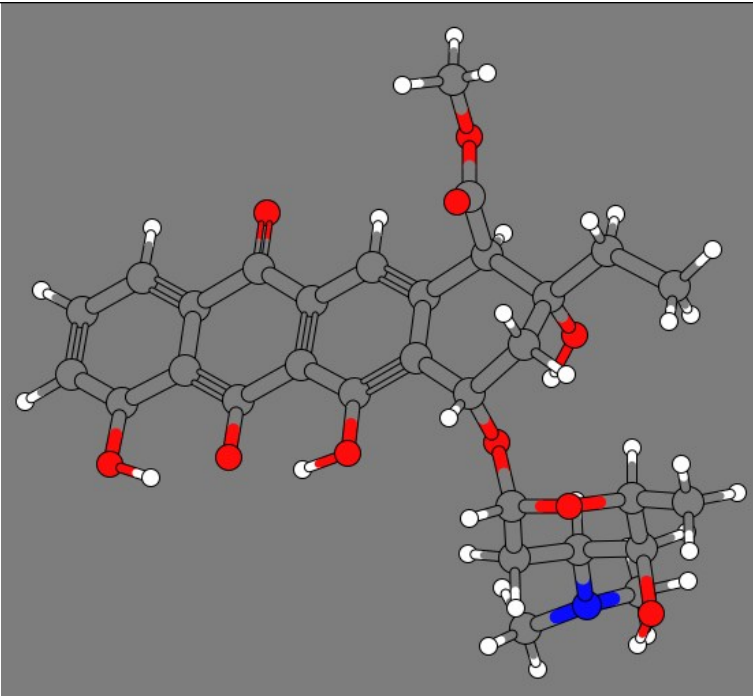 A 3D ball-and-stick model of the molecule Aklavin. The structure features a complex polycyclic core with several fused rings. It includes multiple hydroxyl groups (red and white spheres) and a side chain with a nitrogen atom (blue sphere) and a methyl group (grey and white spheres). The model is set against a dark grey background. |
| <p>2'-Bromo-4'-epi-daunorubicin</p> | <p>NSC 650931</p> |  A 3D ball-and-stick model of the molecule 2'-Bromo-4'-epi-daunorubicin. The structure is a complex polycyclic molecule with a central ring system and several hydroxyl groups. A bromine atom (dark red sphere) is attached to the 2' position. The model is set against a dark grey background.                                           |

Cinerubin A

NSC 243022 /  
34044-10-5

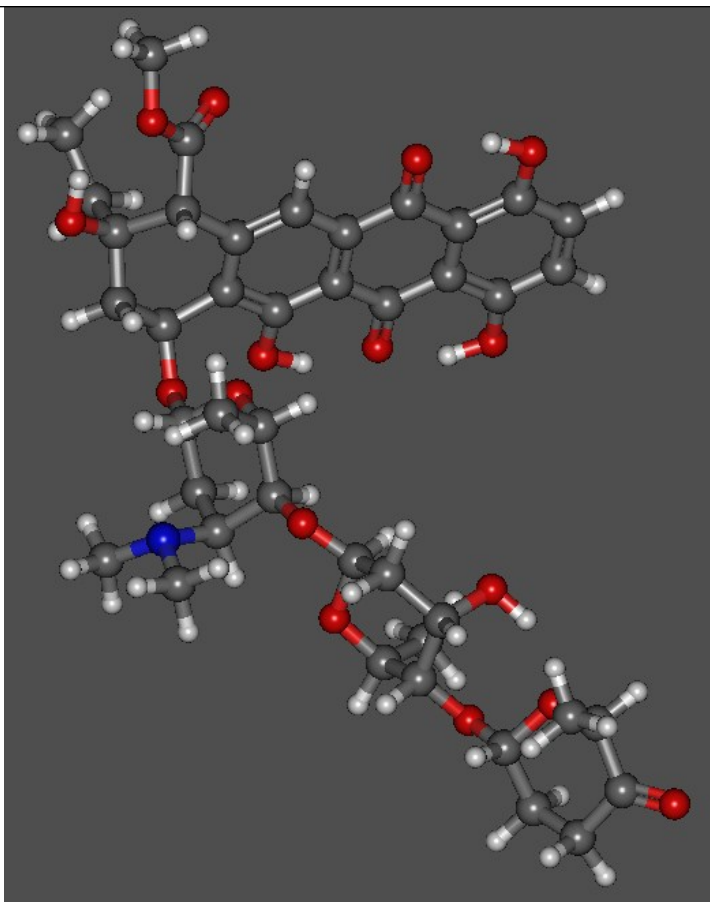

|                                                   |                   |  |                                                                                                                                                                                                                                                                                                                                                                        |  |
|---------------------------------------------------|-------------------|--|------------------------------------------------------------------------------------------------------------------------------------------------------------------------------------------------------------------------------------------------------------------------------------------------------------------------------------------------------------------------|--|
| <p>N-(1-Cyano-2-methoxyethyl)<br/>doxorubicin</p> | <p>NSC 639659</p> |  | 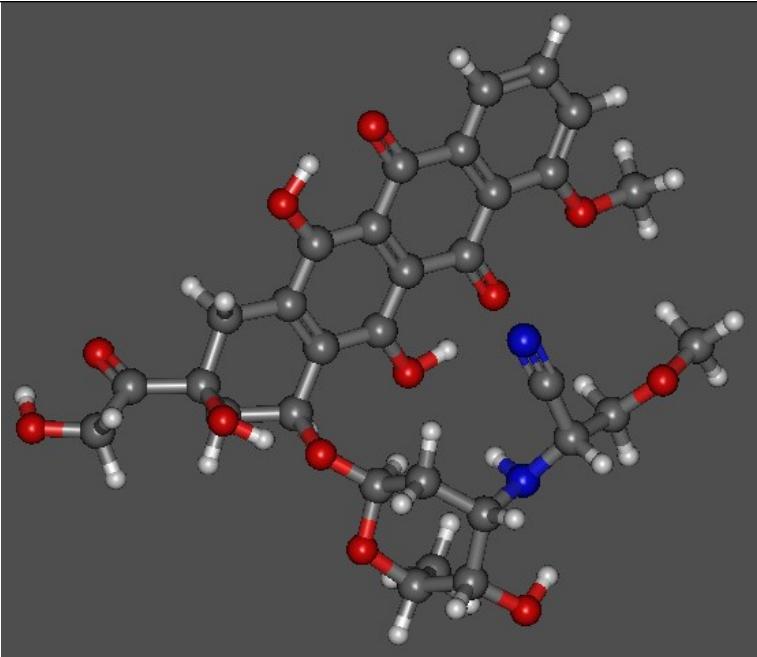 A 3D ball-and-stick model of N-(1-Cyano-2-methoxyethyl)doxorubicin. The molecule features a tetracyclic doxorubicin core with a cyanoethyl group at C-13 and a methoxy group at C-10. The atoms are color-coded: carbon (grey), oxygen (red), hydrogen (white), and nitrogen (blue). |  |
| <p>Cyanomorpholino doxorubicin</p>                | <p>88254-07-3</p> |  |  A 3D ball-and-stick model of Cyanomorpholino doxorubicin. The molecule features a tetracyclic doxorubicin core with a cyanomorpholino group at C-13 and a methoxy group at C-10. The atoms are color-coded: carbon (grey), oxygen (red), hydrogen (white), and nitrogen (blue).    |  |



|                                                 |                   |  |                                                                                     |  |
|-------------------------------------------------|-------------------|--|-------------------------------------------------------------------------------------|--|
| <p>Daunomycin 3,4-dichlorobenzoyl hydrazone</p> | <p>66996-54-1</p> |  | 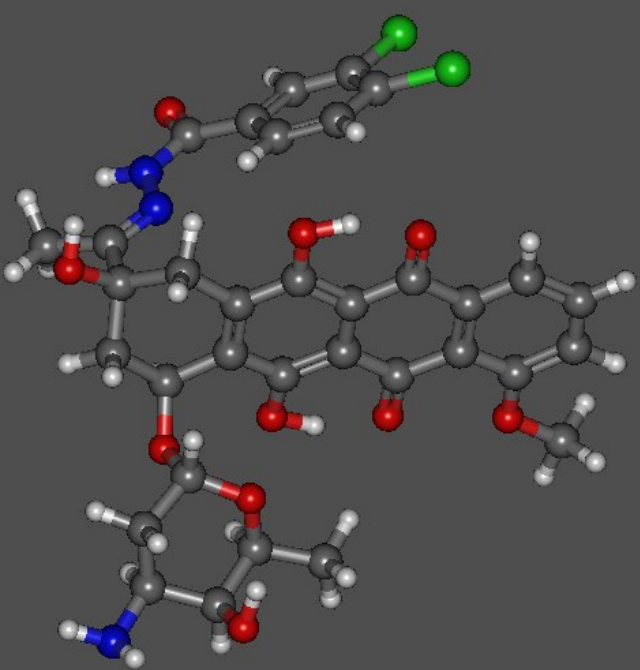  |  |
| <p>Daunomycin 4-nitrobenzoylhydrazone</p>       | <p>66996-56-3</p> |  |  |  |

|                           |                            |  |                                                                                                                                                                                                                                                                                                                                                                                                                  |  |
|---------------------------|----------------------------|--|------------------------------------------------------------------------------------------------------------------------------------------------------------------------------------------------------------------------------------------------------------------------------------------------------------------------------------------------------------------------------------------------------------------|--|
| Daunomycin 3-oxime        | 34610-60-1                 |  | 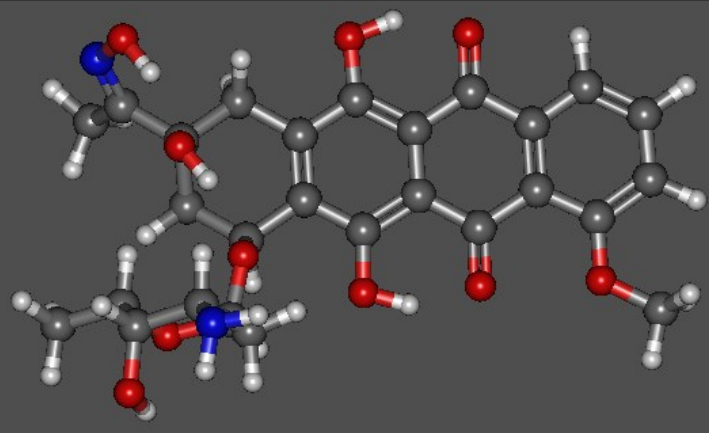 A ball-and-stick model of Daunomycin 3-oxime. The molecule features a complex polycyclic core with a central nitrogen atom (blue) bonded to a hydrogen atom (white) and two oxygen atoms (red). The structure is highly branched and includes several hydroxyl groups (red and white) and a carbonyl group (red and grey).     |  |
| Daunorubicin / Daunomycin | 20830-81-3 /<br>23541-50-6 |  |  A ball-and-stick model of Daunorubicin / Daunomycin. The molecule is a complex polycyclic structure with a central nitrogen atom (blue) bonded to a hydrogen atom (white) and two oxygen atoms (red). It features a highly branched core with multiple hydroxyl groups (red and white) and a carbonyl group (red and grey). |  |

|                                                |                   |  |                                                                                                                                                                                                                                                                                                                                                                                                                   |  |
|------------------------------------------------|-------------------|--|-------------------------------------------------------------------------------------------------------------------------------------------------------------------------------------------------------------------------------------------------------------------------------------------------------------------------------------------------------------------------------------------------------------------|--|
| <p>4-Demethoxyadriamycin /<br/>Medorubicin</p> | <p>64363-63-9</p> |  | 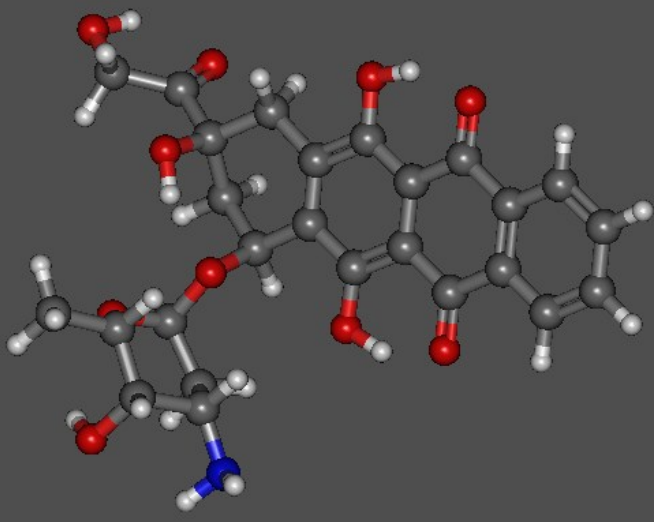 <p>A ball-and-stick model of the anticancer drug 4-Demethoxyadriamycin (Medorubicin). The molecule features a tetracyclic anthracycline core with a dimethylamino group at position 10 and a hydroxyl group at position 4. The atoms are color-coded: carbon (grey), oxygen (red), hydrogen (white), and nitrogen (blue).</p>   |  |
| <p>N,N-dibenzyl-daunorubicin</p>               | <p>70878-51-2</p> |  |  <p>A ball-and-stick model of the anticancer drug N,N-dibenzyl-daunorubicin. The molecule features a tetracyclic anthracycline core with a dimethylamino group at position 10 and two hydroxyl groups at positions 1 and 4. The atoms are color-coded: carbon (grey), oxygen (red), hydrogen (white), and nitrogen (blue).</p> |  |

|                        |            |  |                                                                                                                                                                                                                                                                                                                                                                                      |  |
|------------------------|------------|--|--------------------------------------------------------------------------------------------------------------------------------------------------------------------------------------------------------------------------------------------------------------------------------------------------------------------------------------------------------------------------------------|--|
| N,N-diethyladriamycin  | 70844-09-6 |  | 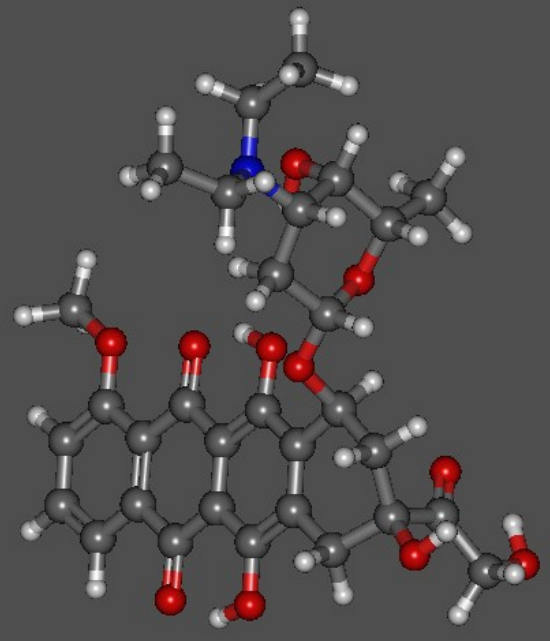 A 3D ball-and-stick model of N,N-diethyladriamycin. The molecule features a complex polycyclic core with a central nitrogen atom (blue) bonded to two ethyl groups (grey and white). The core includes several oxygen atoms (red) and hydrogen atoms (white) attached to carbon atoms (grey).    |  |
| N,N-dimethyladriamycin | 67106-76-7 |  |  A 3D ball-and-stick model of N,N-dimethyladriamycin. The molecule features a complex polycyclic core with a central nitrogen atom (blue) bonded to two methyl groups (grey and white). The core includes several oxygen atoms (red) and hydrogen atoms (white) attached to carbon atoms (grey). |  |

|                                 |                                    |  |                                                                                                                                                                                                                                                                                                                                                                                           |  |
|---------------------------------|------------------------------------|--|-------------------------------------------------------------------------------------------------------------------------------------------------------------------------------------------------------------------------------------------------------------------------------------------------------------------------------------------------------------------------------------------|--|
| <p>N,N-dimethyldaunomycin</p>   | <p>70095-84-0</p>                  |  | 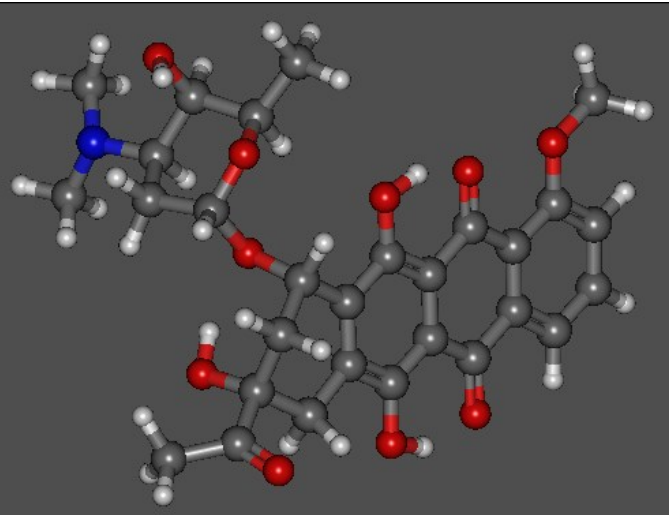 A ball-and-stick model of N,N-dimethyldaunomycin. The molecule features a complex polycyclic core with a central nitrogen atom (blue) bonded to two methyl groups (grey and white). It has several hydroxyl groups (red and white) and a dimethylamino group (blue and grey) attached to the structure. |  |
| <p>Doxorubicin / Adriamycin</p> | <p>25316-40-9 /<br/>23214-92-8</p> |  |  A ball-and-stick model of Doxorubicin / Adriamycin. The molecule consists of a tetracyclic anthracycline core with a dimethylamino group (blue and grey) and a D-glucopyranoside sugar moiety (grey, white, and red) attached to the structure.                                                       |  |

|                    |                   |  |                                                                                                                                                                                                                                                                                                                                                |  |
|--------------------|-------------------|--|------------------------------------------------------------------------------------------------------------------------------------------------------------------------------------------------------------------------------------------------------------------------------------------------------------------------------------------------|--|
| <p>Duborimycin</p> | <p>NSC 180510</p> |  | 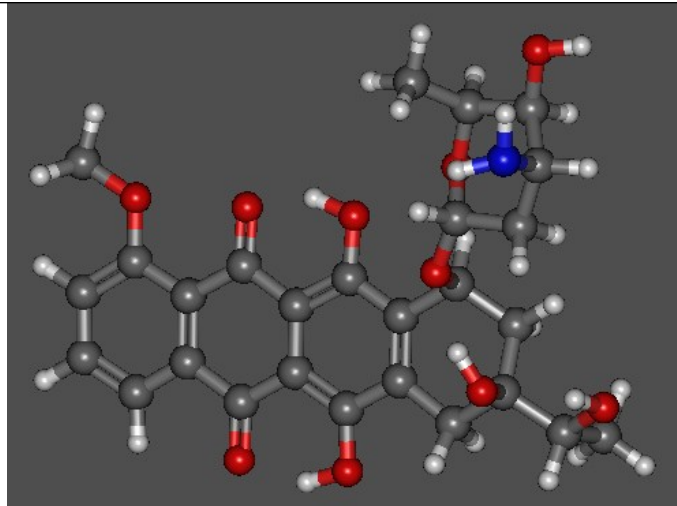 A 3D ball-and-stick model of the molecule Duborimycin. The structure features a complex polycyclic core with several hydroxyl groups and a nitrogen atom. The atoms are color-coded: carbon is grey, oxygen is red, hydrogen is white, and nitrogen is blue. |  |
| <p>Epirubicin</p>  | <p>56390-09-1</p> |  |  A 3D ball-and-stick model of the molecule Epirubicin. The structure is a complex polycyclic system with multiple hydroxyl groups and a nitrogen atom. The atoms are color-coded: carbon is grey, oxygen is red, hydrogen is white, and nitrogen is blue.   |  |

Esorubicin

63950-06-1

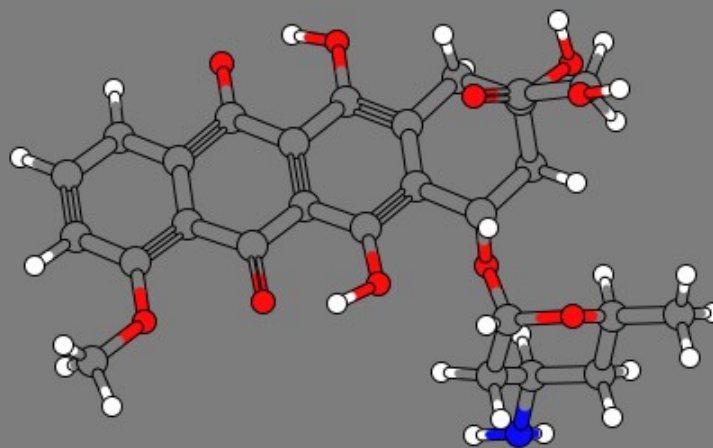

11-Hydroxy aclacinomycin A

NSC 670121

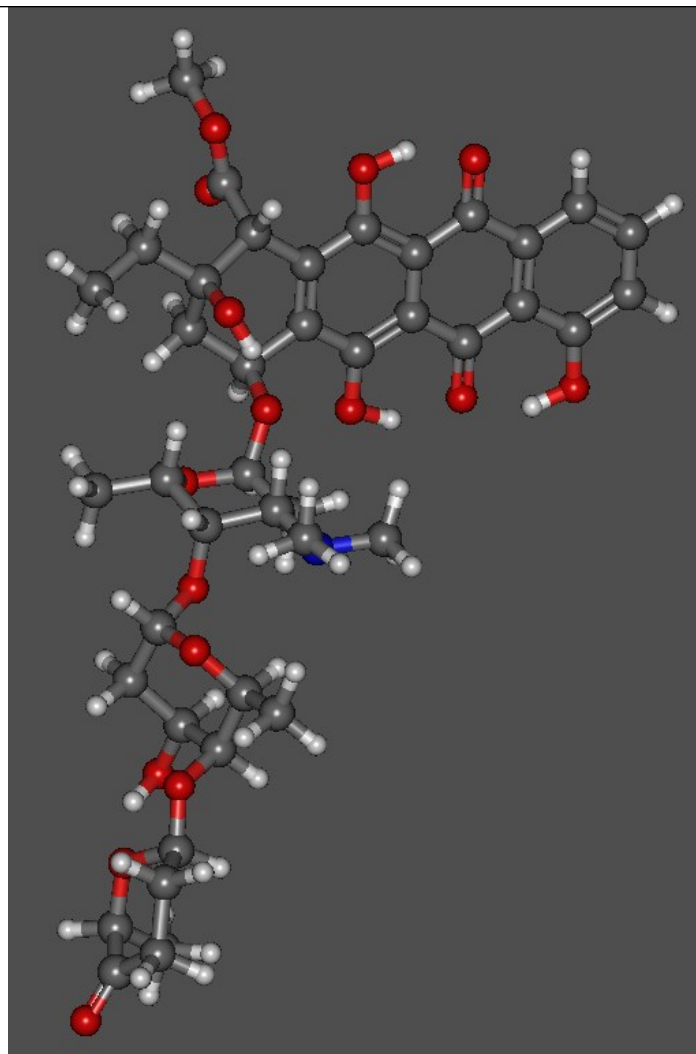



|                                   |                   |  |                                                                                                                                                                                                                                                                                                                                                                                                                                                                        |  |
|-----------------------------------|-------------------|--|------------------------------------------------------------------------------------------------------------------------------------------------------------------------------------------------------------------------------------------------------------------------------------------------------------------------------------------------------------------------------------------------------------------------------------------------------------------------|--|
| <p>11-Hydroxy aclacinomycin X</p> | <p>NSC 670122</p> |  | 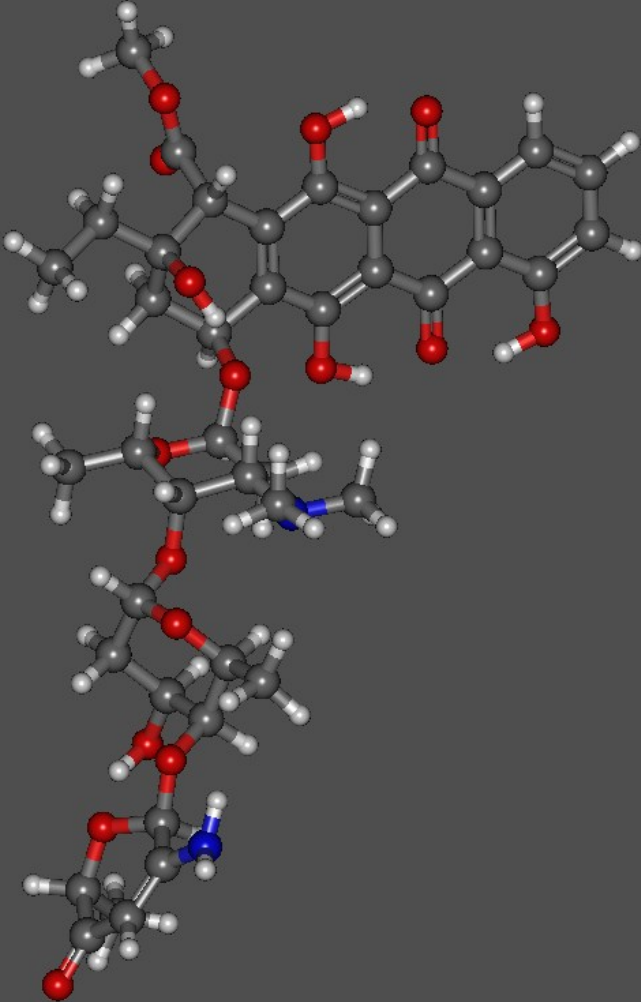 <p>A 3D ball-and-stick model of the molecule 11-Hydroxy aclacinomycin X. The structure is a complex polycyclic molecule with a central fused ring system. It features several hydroxyl groups (red oxygen atoms bonded to white hydrogen atoms) and a nitrogen atom (blue) within the ring system. The model is rendered in a perspective view against a dark gray background.</p> |  |
|-----------------------------------|-------------------|--|------------------------------------------------------------------------------------------------------------------------------------------------------------------------------------------------------------------------------------------------------------------------------------------------------------------------------------------------------------------------------------------------------------------------------------------------------------------------|--|

|                                |                   |  |                                                                                                                                                                                                                                                                                                                                                            |  |
|--------------------------------|-------------------|--|------------------------------------------------------------------------------------------------------------------------------------------------------------------------------------------------------------------------------------------------------------------------------------------------------------------------------------------------------------|--|
| <p>3'-Hydroxy daunorubicin</p> | <p>64842-75-7</p> |  | 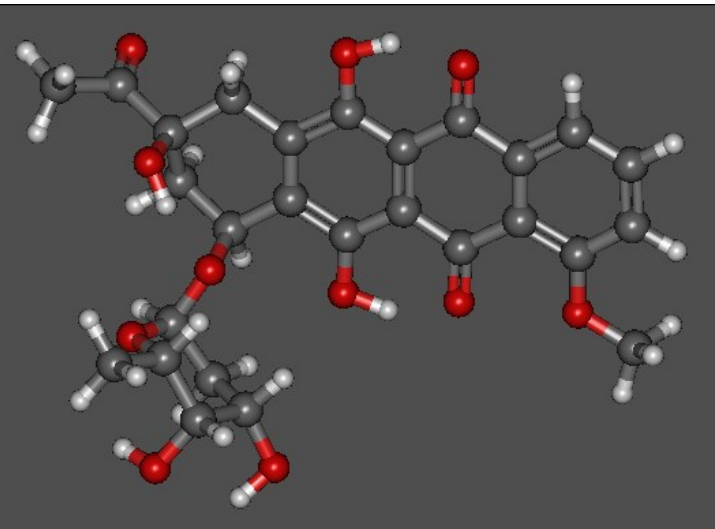 A ball-and-stick model of 3'-Hydroxy daunorubicin. The molecule features a tetracyclic anthracycline core with a hydroxyl group at the 3' position of the aglycone moiety. The atoms are color-coded: carbon (grey), oxygen (red), and hydrogen (white).                 |  |
| <p>Idarubicin</p>              | <p>57852-57-0</p> |  |  A ball-and-stick model of Idarubicin. The molecule features a tetracyclic anthracycline core with a 4-oxo-1,2,3,4-tetrahydrophthalazine ring system at the 12-position. The atoms are color-coded: carbon (grey), oxygen (red), hydrogen (white), and nitrogen (blue). |  |

5-Imino daunorubicin

67324-99-6

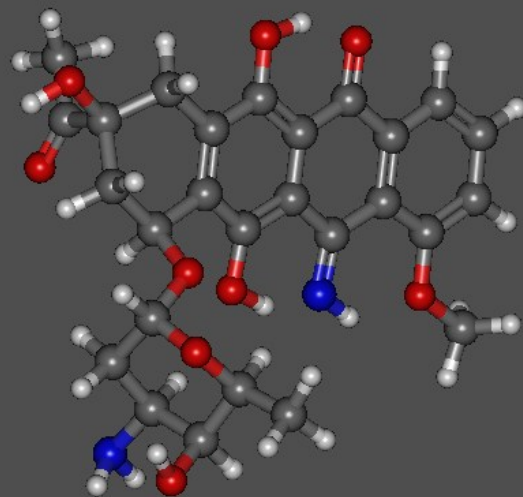

Marcellomycin

63710-10-1

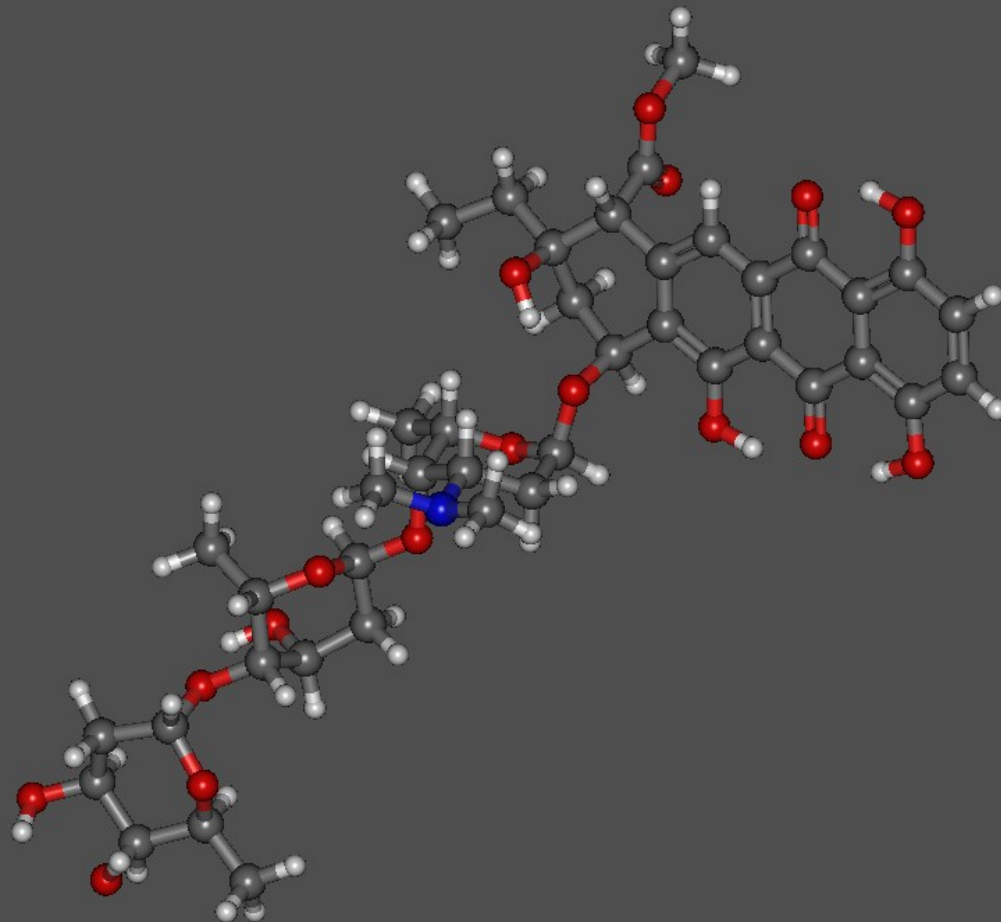

|                                |                   |                                                                                                                                                                                                                                                                                                                                                                                           |
|--------------------------------|-------------------|-------------------------------------------------------------------------------------------------------------------------------------------------------------------------------------------------------------------------------------------------------------------------------------------------------------------------------------------------------------------------------------------|
| <p>Menogaril</p>               | <p>71628-96-1</p> | 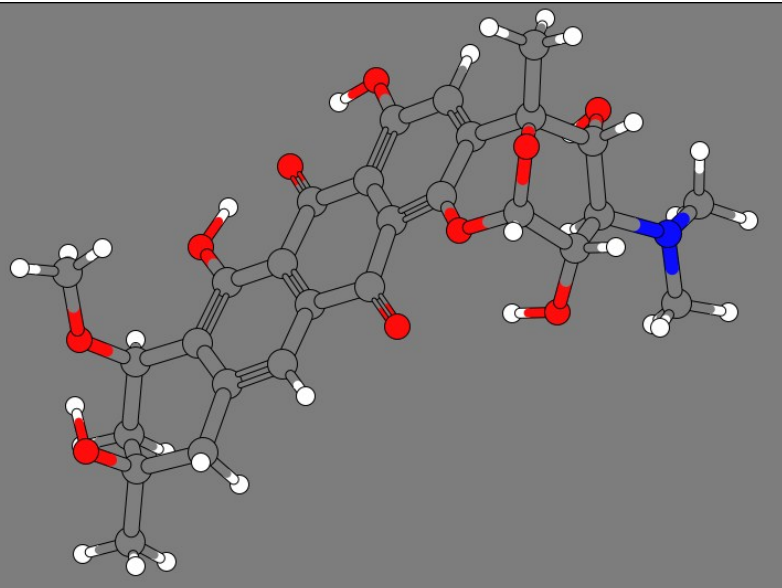 <p>A 3D ball-and-stick model of the Menogaril molecule. The structure features a complex polycyclic core with multiple hydroxyl groups (red and white) and a methylamino group (blue and white). The atoms are color-coded: carbon is grey, oxygen is red, hydrogen is white, and nitrogen is blue.</p> |
| <p>4'-O-methylodoxorubicin</p> | <p>77121-90-5</p> |  <p>A 3D ball-and-stick model of the 4'-O-methylodoxorubicin molecule. It shows a tetracyclic anthracycline core with several hydroxyl groups and a methylamino group. The atoms are color-coded: carbon is grey, oxygen is red, hydrogen is white, and nitrogen is blue.</p>                          |

|                              |                   |  |                                                                                                                                                                                                                                                                                                                                                                                                                           |  |
|------------------------------|-------------------|--|---------------------------------------------------------------------------------------------------------------------------------------------------------------------------------------------------------------------------------------------------------------------------------------------------------------------------------------------------------------------------------------------------------------------------|--|
| <p>Morpholino adriamycin</p> | <p>89196-04-3</p> |  | 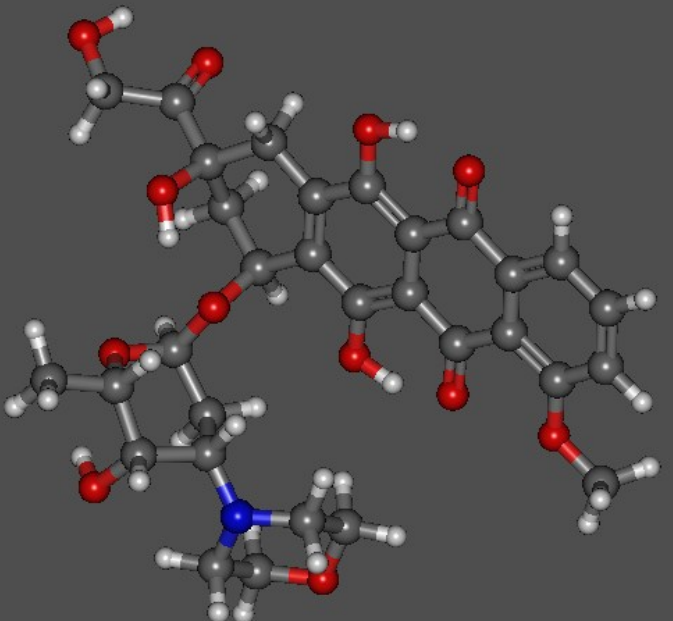 A 3D ball-and-stick model of Morpholino adriamycin. The molecule features a complex polycyclic core with multiple hydroxyl groups (red and white spheres) and a morpholine ring system (blue and white spheres) attached to the side chain. The atoms are colored: carbon (grey), oxygen (red), nitrogen (blue), and hydrogen (white). |  |
| <p>MX2</p>                   | <p>NCI 619003</p> |  |  A 3D ball-and-stick model of MX2. The structure is similar to Morpholino adriamycin but with a different side chain configuration. It shows a complex polycyclic core with multiple hydroxyl groups and a morpholine ring system. The atoms are colored: carbon (grey), oxygen (red), nitrogen (blue), and hydrogen (white).          |  |

NSC 286628

NSC 286628 /  
67903-59-7

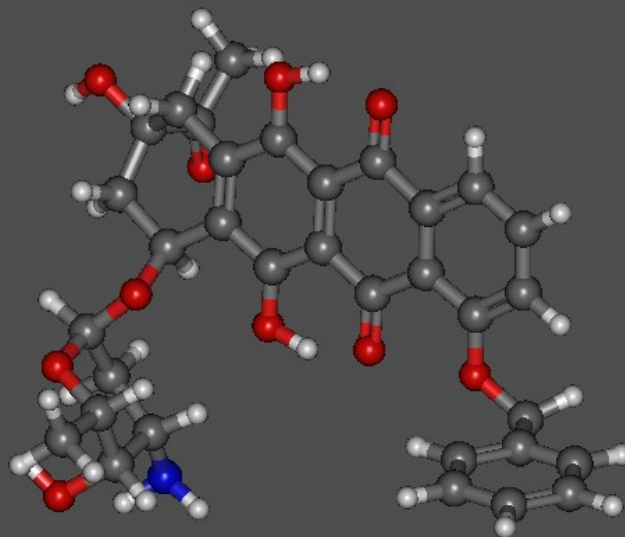

Nogalamycin

1404-15-5

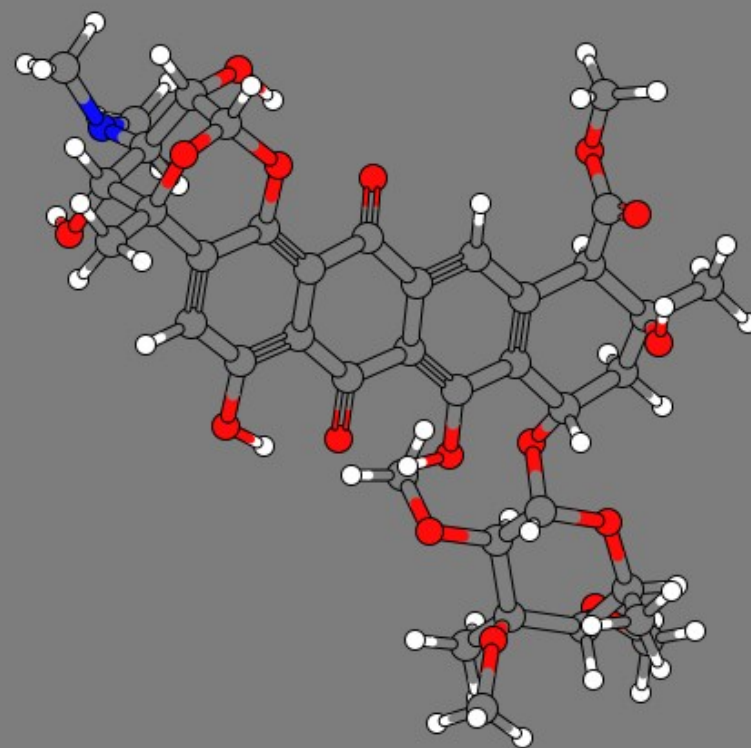

Pirarubicin

72496-41-4

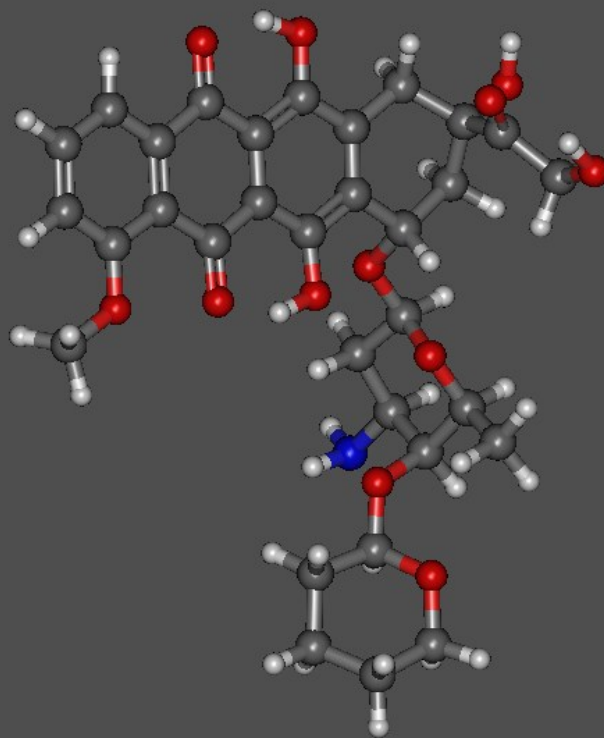



|                      |                   |  |                                                                                                                                                                                                                                                                                                                                                                                                                                                     |  |
|----------------------|-------------------|--|-----------------------------------------------------------------------------------------------------------------------------------------------------------------------------------------------------------------------------------------------------------------------------------------------------------------------------------------------------------------------------------------------------------------------------------------------------|--|
| <p>Pyrrromycin</p>   | <p>668-17-7</p>   |  | 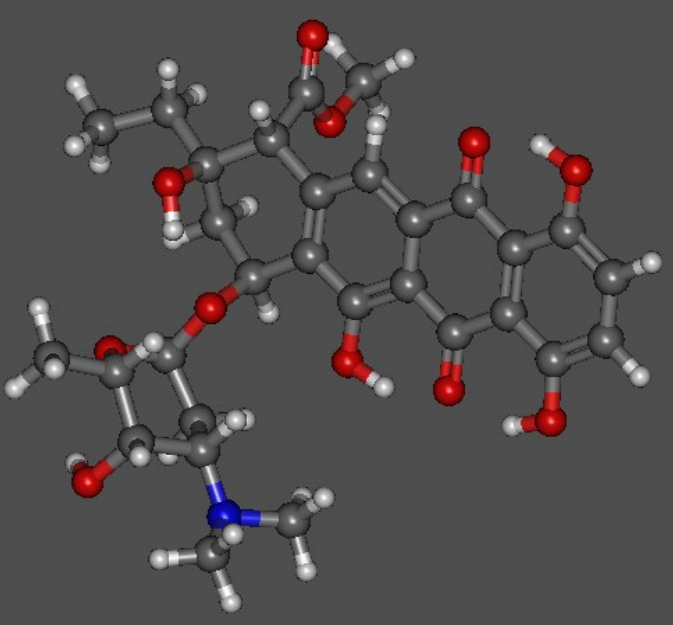 A 3D ball-and-stick model of the molecule Pyrrromycin. The structure features a complex polycyclic ring system with several hydroxyl groups (red oxygen atoms bonded to white hydrogen atoms) and a nitrogen atom (blue) bonded to two hydrogen atoms. The atoms are represented by spheres: carbon (grey), oxygen (red), hydrogen (white), and nitrogen (blue). |  |
| <p>Rhodomyconone</p> | <p>21288-60-8</p> |  |  A 3D ball-and-stick model of the molecule Rhodomyconone. The structure is a complex polycyclic ring system with multiple hydroxyl groups (red oxygen atoms bonded to white hydrogen atoms). The atoms are represented by spheres: carbon (grey), oxygen (red), and hydrogen (white).                                                                            |  |

|               |            |                                                                                                                                                                                                                                                                                                                                                                                                                               |
|---------------|------------|-------------------------------------------------------------------------------------------------------------------------------------------------------------------------------------------------------------------------------------------------------------------------------------------------------------------------------------------------------------------------------------------------------------------------------|
| Steffimycin   | 11033-34-4 | 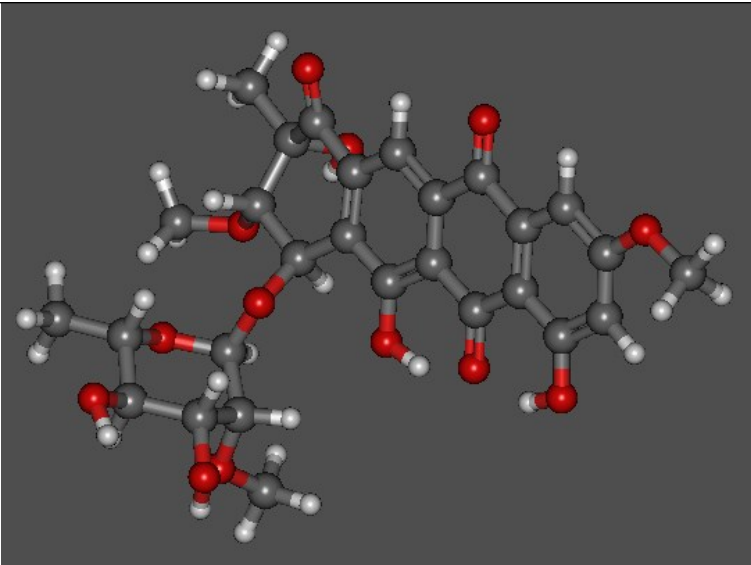 A 3D ball-and-stick model of Steffimycin, a complex polyketide antibiotic. The molecule features a long, zig-zagging carbon backbone with several oxygen-containing functional groups, including hydroxyl and ether linkages, and a terminal methyl group. The atoms are color-coded: carbon is grey, oxygen is red, and hydrogen is white. |
| Steffimycin B | NCI 204856 |  A 3D ball-and-stick model of Steffimycin B, another complex polyketide antibiotic. It has a similar structure to Steffimycin but with a different arrangement of oxygen-containing groups, particularly in the terminal region. The atoms are color-coded: carbon is grey, oxygen is red, and hydrogen is white.                          |

Theprubicin

95343-20-7

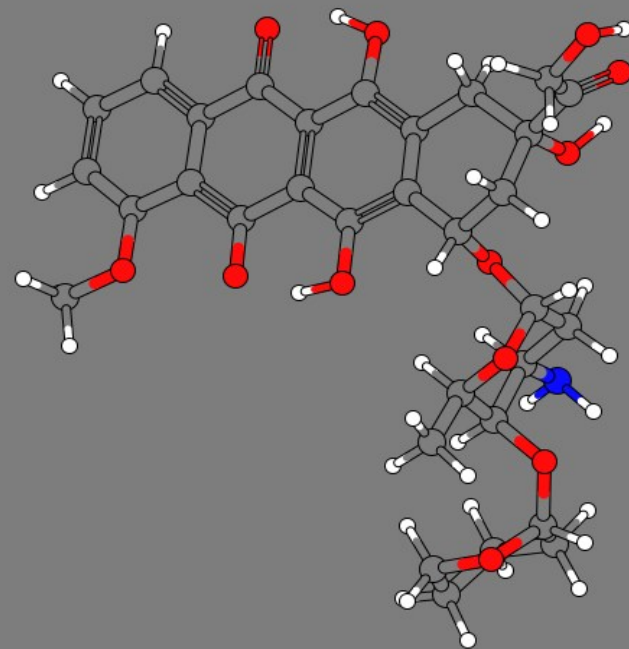

|                               |                   |                                                                                                                                                                                                                                                                                                                                                                                                                                                                                                                                                   |
|-------------------------------|-------------------|---------------------------------------------------------------------------------------------------------------------------------------------------------------------------------------------------------------------------------------------------------------------------------------------------------------------------------------------------------------------------------------------------------------------------------------------------------------------------------------------------------------------------------------------------|
| <p>Valrubicin</p>             | <p>56124-62-0</p> | 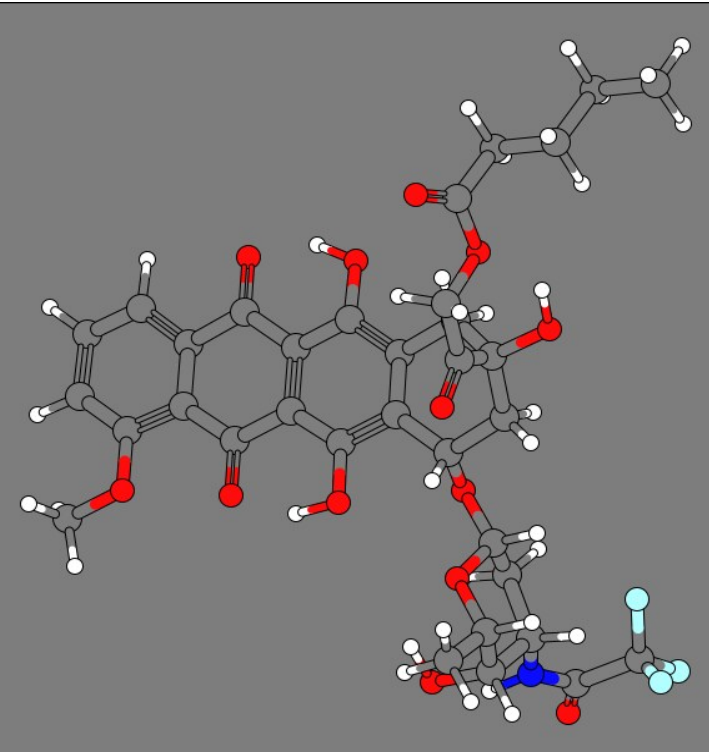 <p>A 3D ball-and-stick model of Valrubicin, a complex polycyclic molecule. The structure features a central core with multiple fused rings, including a benzene ring and a pyridine ring. It is substituted with several hydroxyl groups (red and white), a methyl group (grey and white), and a side chain containing a carbonyl group (red and white) and a methyl group (grey and white). The model is set against a dark grey background.</p>               |
| <p>Zorubicin / Rubidazole</p> | <p>36508-71-1</p> |  <p>A 3D ball-and-stick model of Zorubicin / Rubidazole, a complex polycyclic molecule. The structure features a central core with multiple fused rings, including a benzene ring and a pyridine ring. It is substituted with several hydroxyl groups (red and white), a methyl group (grey and white), and a side chain containing a carbonyl group (red and white) and a methyl group (grey and white). The model is set against a dark grey background.</p> |

AG-TC base pairs

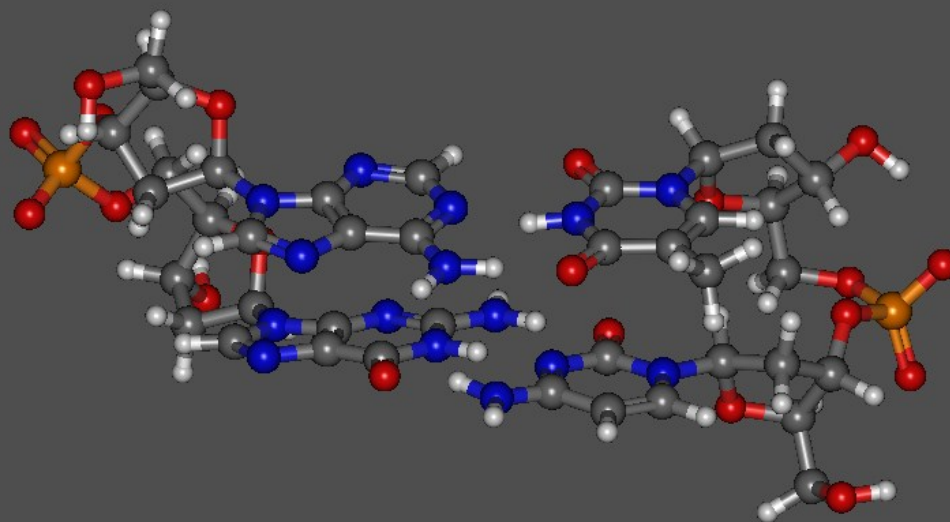

## 7. Cartesian coordinates of the optimized chemical structures of anthracycline's semi-quinone free radicals

| Name                                            | NSC No. / CAS No. | Cartesian coordinates                           |
|-------------------------------------------------|-------------------|-------------------------------------------------|
| 3'-Acetoxy-4'-O-acetylodoxorubicin              | 73113-92-5        | H 1.0 -2.7645709770 -1.6775907201 -6.6969163819 |
|                                                 |                   | H 1.0 -1.0063748326 -1.9735035253 -6.7792928583 |
|                                                 |                   | H 1.0 -2.1374068937 -3.3478612394 -6.6513276900 |
|                                                 |                   | C 6.0 -1.9439526571 -2.3130087816 -6.3339661410 |
|                                                 |                   | H 1.0 -4.1581955812 -3.1275420452 -5.6875609320 |
|                                                 |                   | O 8.0 -1.7664109122 -2.2077501420 -4.9392134710 |
|                                                 |                   | C 6.0 -4.0067583074 -3.0353238379 -4.6193125715 |
|                                                 |                   | H 1.0 -5.9886535281 -3.7576585006 -4.1601506098 |
|                                                 |                   | C 6.0 -2.7962775189 -2.5669640244 -4.1185181602 |
|                                                 |                   | C 6.0 -5.0516046973 -3.3944213481 -3.7449356727 |
|                                                 |                   | C 6.0 -2.5839537193 -2.4415296088 -2.7048283914 |
|                                                 |                   | O 8.0 -0.3241388222 -1.6247403032 -2.8460173399 |
|                                                 |                   | H 1.0 2.1463090704 6.4391768739 -3.1277411163   |
|                                                 |                   | C 6.0 -4.8869032632 -3.2852891704 -2.3832421763 |
|                                                 |                   | H 1.0 0.9713508134 2.2666325939 -3.0696103617   |
|                                                 |                   | C 6.0 -1.3303982711 -1.9653469404 -2.1283643086 |
|                                                 |                   | H 1.0 -5.6701106464 -3.5513440539 -1.6830068971 |
|                                                 |                   | C 6.0 -3.6689696523 -2.8126628175 -1.8458811776 |
|                                                 |                   | H 1.0 3.2165384020 5.3729742658 -2.1819706342   |
|                                                 |                   | C 6.0 2.2064595584 5.4978855760 -2.5826648363   |
|                                                 |                   | H 1.0 0.6862403489 -1.3030411654 -1.8129831942  |
|                                                 |                   | O 8.0 4.8641964008 4.2963491049 -0.3390783724   |
|                                                 |                   | H 1.0 2.6633582949 3.4431497652 -1.4357958189   |
|                                                 |                   | H 1.0 2.0213971494 4.6686639379 -3.2724709868   |
|                                                 |                   | C 6.0 0.3219516052 2.0275618325 -2.2193967498   |
|                                                 |                   | H 1.0 -0.1038739535 1.0370725951 -2.3915868282  |
|                                                 |                   | C 6.0 1.1520655410 5.5410825990 -1.4886431593   |
|                                                 |                   | H 1.0 5.7023065762 6.5296101772 0.6194900577    |
|                                                 |                   | H 1.0 -0.4832171534 2.7650142863 -2.1685631882  |
|                                                 |                   | O 8.0 0.4333723468 6.4999660190 -1.3200087429   |
|                                                 |                   | C 6.0 -1.2412512189 -1.8686297445 -0.6799765950 |
|                                                 |                   | O 8.0 1.0356076292 -1.1279660487 -0.8594117359  |
| C 6.0 -3.5655044622 -2.7187195849 -0.3960600037 |                   |                                                 |
| H 1.0 1.8605628048 1.2105353434 -0.9606056974   |                   |                                                 |
| C 6.0 4.2885540620 4.9274561556 0.5255950499    |                   |                                                 |
| C 6.0 1.8925151130 3.3320390023 -0.6734648212   |                   |                                                 |
| C 6.0 1.1225066209 2.0208037867 -0.9260432921   |                   |                                                 |
| O 8.0 0.9869549833 4.4567278858 -0.6925736352   |                   |                                                 |

|                 |            |   |     |               |               |               |
|-----------------|------------|---|-----|---------------|---------------|---------------|
|                 |            | C | 6.0 | 4.7686086517  | 6.2410086718  | 1.1012886826  |
|                 |            | C | 6.0 | -0.0308312405 | -1.4070961815 | -0.0877143420 |
|                 |            | O | 8.0 | -4.5449119252 | -3.0667679760 | 0.3549446396  |
|                 |            | C | 6.0 | -2.3309377255 | -2.2255463531 | 0.1632897336  |
|                 |            | H | 1.0 | 3.3493816447  | 2.5338036928  | 0.6777499194  |
|                 |            | H | 1.0 | 4.0102309695  | 7.0138643709  | 0.9461008587  |
|                 |            | O | 8.0 | 3.1273297268  | 4.5575549079  | 1.0956486775  |
|                 |            | C | 6.0 | 2.5492477324  | 3.2772121861  | 0.7135824263  |
|                 |            | H | 1.0 | 4.9179425612  | 6.1442999450  | 2.1805633666  |
|                 |            | O | 8.0 | 0.2040745505  | 1.7564667033  | 0.1374705721  |
|                 |            | C | 6.0 | 0.0686699120  | -1.2426136999 | 1.3044466967  |
|                 |            | C | 6.0 | -2.1970809823 | -2.1127023948 | 1.5740769849  |
|                 |            | O | 8.0 | 1.7853719325  | 0.5924296609  | 1.4376051098  |
|                 |            | H | 1.0 | 2.1832462147  | -1.3616510757 | 1.4773934437  |
|                 |            | H | 1.0 | -3.9373038668 | -2.7948160754 | 1.7454708852  |
|                 |            | C | 6.0 | 1.5274232270  | 2.9228160656  | 1.7862582526  |
|                 |            | C | 6.0 | 0.8193452547  | 1.6143806512  | 1.4048379177  |
|                 |            | C | 6.0 | 1.3777618747  | -0.7383992161 | 1.8751206735  |
|                 |            | C | 6.0 | -1.0134851567 | -1.6236071923 | 2.1364212035  |
|                 |            | H | 1.0 | 0.7852141961  | 3.7236253077  | 1.8498000308  |
|                 |            | O | 8.0 | -3.2101559012 | -2.4873236439 | 2.3889513980  |
|                 |            | H | 1.0 | 2.0195907889  | 2.8164274571  | 2.7570706383  |
|                 |            | H | 1.0 | 1.7282034939  | -5.3789887267 | 3.6439215886  |
|                 |            | H | 1.0 | -0.0102617191 | 1.4037572763  | 2.0890609667  |
|                 |            | O | 8.0 | 0.8376120133  | -5.6328552738 | 3.9465960057  |
|                 |            | C | 6.0 | 1.4368606069  | -0.7500031601 | 3.4184150694  |
|                 |            | C | 6.0 | -0.8921996118 | -1.5812480509 | 3.6427834910  |
|                 |            | H | 1.0 | 1.0851080799  | 0.2144509504  | 3.8007415262  |
|                 |            | O | 8.0 | 2.2364069463  | -3.4547555304 | 3.5296696991  |
|                 |            | H | 1.0 | -1.1998609527 | -0.6102828776 | 4.0565356335  |
|                 |            | H | 1.0 | 2.4789880561  | -0.8694189760 | 3.7331453198  |
|                 |            | C | 6.0 | 1.0617032455  | -3.2371090319 | 3.7959444311  |
|                 |            | H | 1.0 | -1.5653928543 | -2.3179767384 | 4.0872364726  |
|                 |            | C | 6.0 | 0.1264526560  | -4.4209627603 | 3.9905486587  |
|                 |            | C | 6.0 | 0.5536596761  | -1.8091933944 | 4.0729452388  |
|                 |            | H | 1.0 | -0.6526096994 | -4.3725781694 | 3.2129082197  |
|                 |            | H | 1.0 | -0.3824784122 | -4.3029084282 | 4.9576776223  |
|                 |            | O | 8.0 | 0.5952402832  | -1.6966540908 | 5.5117896344  |
|                 |            | H | 1.0 | 1.5300372114  | -1.6940805975 | 5.7647135867  |
| Aclacinomycin X | NSC 670120 | H | 1.0 | -0.4262582990 | 10.1567019898 | 3.5734493682  |
|                 |            | H | 1.0 | 1.0628690561  | 11.3294823952 | 1.9393872066  |
|                 |            | C | 6.0 | 0.2581762042  | 9.5993978509  | 2.9411497890  |
|                 |            | C | 6.0 | 1.0992852619  | 10.2451519431 | 2.0201067503  |

|   |     |               |               |               |
|---|-----|---------------|---------------|---------------|
| O | 8.0 | -0.5308961375 | 7.6147131400  | 3.9537472163  |
| C | 6.0 | 0.2871759029  | 8.2124166672  | 3.0619959091  |
| C | 6.0 | 1.9678818930  | 9.5202977880  | 1.2195375515  |
| H | 1.0 | 2.6258153610  | 9.9972960914  | 0.5016406940  |
| H | 1.0 | -0.3392162191 | 6.6353054560  | 3.8670651194  |
| C | 6.0 | 1.1758005360  | 7.4398380363  | 2.2470800859  |
| C | 6.0 | 2.0212700830  | 8.1175626932  | 1.3176143664  |
| O | 8.0 | 0.4322796674  | 5.3844778829  | 3.2203226886  |
| C | 6.0 | 1.2084454860  | 6.0040076144  | 2.3703669519  |
| C | 6.0 | 2.9537502081  | 7.3780459848  | 0.4520116473  |
| O | 8.0 | 3.6994805329  | 7.9641405495  | -0.3654855234 |
| C | 6.0 | 2.1170679214  | 5.2618804421  | 1.5357532951  |
| H | 1.0 | 0.8378611765  | 3.9074802253  | 2.9486094728  |
| C | 6.0 | 2.9667093052  | 5.9161712410  | 0.5966935530  |
| O | 8.0 | 1.3608862857  | 3.1785935493  | 2.4775846599  |
| C | 6.0 | 2.1721652722  | 3.8391613162  | 1.6251649866  |
| C | 6.0 | 3.8348053757  | 5.1529941796  | -0.2034509869 |
| H | 1.0 | 4.4668756225  | 5.6880760747  | -0.9042706945 |
| H | 1.0 | -2.6536069859 | 1.5409816458  | -0.3225312151 |
| H | 1.0 | -3.4727679787 | 1.4188555560  | -1.8774128449 |
| H | 1.0 | -1.8730287074 | 2.1882945201  | -1.7835049765 |
| H | 1.0 | -0.6981435067 | 1.4231111080  | 0.4986639956  |
| C | 6.0 | -2.4958270709 | 1.3649850092  | -1.3874824147 |
| C | 6.0 | 3.0572349576  | 3.0987455089  | 0.8332338134  |
| C | 6.0 | 3.8865816631  | 3.7695316522  | -0.0973813463 |
| H | 1.0 | 8.0078563629  | 5.1052055364  | 0.4488821071  |
| H | 1.0 | -1.1113869919 | -0.2236153104 | 1.0206120121  |
| C | 6.0 | -0.4429150348 | 0.3686158192  | 0.3882529298  |
| H | 1.0 | 1.0266010348  | 0.3916032830  | 1.9836419581  |
| H | 1.0 | 2.9055929432  | 1.3029636071  | 1.9862529205  |
| C | 6.0 | 3.0131889055  | 1.6009926698  | 0.9380559194  |
| O | 8.0 | 1.7872563009  | 1.1709134771  | 0.2473219444  |
| N | 7.0 | -1.9247964200 | 0.0366010827  | -1.6231139370 |
| H | 1.0 | 4.8679256552  | 3.3907821553  | -1.9696046601 |
| C | 6.0 | 4.8903840738  | 2.9883508691  | -0.9532262134 |
| C | 6.0 | 0.9906896666  | 0.2141961714  | 0.9038515549  |
| O | 8.0 | 6.8928896176  | 4.2540853978  | -1.0953900836 |
| H | 1.0 | 8.4905879162  | 5.4858684170  | -1.2347057969 |
| C | 6.0 | 6.2725922008  | 3.2829600652  | -0.3806581241 |
| C | 6.0 | 8.1443385093  | 4.7041135246  | -0.5583793005 |
| H | 1.0 | -2.9342157804 | -0.0436463522 | -3.4575573652 |
| O | 8.0 | 6.7811316412  | 2.7699881667  | 0.5977787162  |
| C | 6.0 | -0.5640916577 | -0.1073369187 | -1.0667363402 |
| H | 1.0 | 0.1393558151  | 0.4955647846  | -1.6729918765 |



|   |     |               |               |               |
|---|-----|---------------|---------------|---------------|
| H | 1.0 | 2.6492638762  | 1.4174308333  | -1.4458466300 |
| H | 1.0 | -5.6383118609 | -2.4278253546 | -1.7803748970 |
| H | 1.0 | -3.3856619721 | -1.9188956716 | -0.6783376892 |
| C | 6.0 | -1.9362461638 | -0.2491956158 | -3.0586287275 |
| H | 1.0 | -1.2154840378 | 0.3690263310  | -3.6274087280 |
| H | 1.0 | -4.9090392407 | -3.3511413927 | 0.5636906273  |
| C | 6.0 | 4.2332597805  | 0.9104692099  | 0.3249536186  |
| H | 1.0 | 5.0940958971  | 1.0806978786  | 0.9789901596  |
| O | 8.0 | 3.4630531060  | 1.3123130168  | -1.9662174517 |
| H | 1.0 | -2.6585843463 | -3.0742909332 | 1.4228708636  |
| C | 6.0 | 4.5732966583  | 1.4637447707  | -1.0688340510 |
| H | 1.0 | 8.8661213369  | 3.8837483718  | -0.5160077132 |
| H | 1.0 | -4.3607308794 | -1.9296129792 | -2.9025453525 |
| O | 8.0 | 1.4814372579  | -1.1096452135 | 0.7371744422  |
| C | 6.0 | -4.6717431904 | -2.7133619505 | -2.2094572057 |
| H | 1.0 | -6.6033841610 | -6.6108027127 | 2.7781381483  |
| C | 6.0 | -3.6247919507 | -2.8953497343 | -1.1186914172 |
| H | 1.0 | -1.7230685942 | -1.3030147328 | -3.2445048571 |
| C | 6.0 | -4.0742429578 | -3.8221073950 | 0.0242105248  |
| C | 6.0 | -0.0417327493 | -1.5608992055 | -1.1302716287 |
| H | 1.0 | 4.0389065211  | -0.1644117069 | 0.2816840736  |
| H | 1.0 | -5.8990581079 | -5.2686730678 | 0.9652399785  |
| O | 8.0 | -0.8653097011 | -2.4192972843 | -0.3259756633 |
| H | 1.0 | -5.0140941388 | -6.9899584716 | 3.4704507537  |
| C | 6.0 | -2.9063531702 | -4.0530051511 | 0.9982538379  |
| O | 8.0 | -3.2555787135 | -4.8726307740 | 2.0985853220  |
| H | 1.0 | 2.0075449308  | -0.9421487317 | -1.2620684663 |
| C | 6.0 | -5.8438431519 | -7.3920899326 | 2.8833675160  |
| C | 6.0 | 1.4103053994  | -1.5942883513 | -0.6078777788 |
| H | 1.0 | -4.7823673244 | -3.6396404071 | -2.7810029988 |
| H | 1.0 | -6.2967237273 | -8.2283295113 | 3.4216434897  |
| H | 1.0 | 6.0013122971  | 1.2711933951  | -2.6554231097 |
| C | 6.0 | 5.7533065462  | 0.7261153628  | -1.7348428542 |
| H | 1.0 | -0.0376148543 | -1.9211534671 | -2.1659176526 |
| H | 1.0 | 6.6257074925  | 0.7950926485  | -1.0777626670 |
| O | 8.0 | -2.4491813365 | -3.3996360632 | -1.7720860481 |
| H | 1.0 | -3.4670216068 | -5.7554171452 | 1.7468600881  |
| O | 8.0 | -4.5564503310 | -5.0553401750 | -0.5698925451 |
| C | 6.0 | -5.3950860931 | -5.8678175689 | 0.1884272762  |
| C | 6.0 | -1.3335287850 | -3.6077261949 | -0.9130142903 |
| C | 6.0 | -1.6901173284 | -4.5692386770 | 0.2232229101  |
| H | 1.0 | -0.8393940894 | -4.6782268614 | 0.9003449698  |
| N | 7.0 | -6.8906708019 | -5.6664633277 | -1.7087270883 |
| O | 8.0 | -4.6148006757 | -6.8912861004 | 0.7902585085  |

|             |            |                                                 |
|-------------|------------|-------------------------------------------------|
|             |            | C 6.0 -5.3505106345 -7.8940886579 1.5225322064  |
|             |            | C 6.0 -6.4516428575 -6.4881781700 -0.7218387010 |
|             |            | H 1.0 4.6024684065 -0.8198202511 -2.7322993632  |
|             |            | C 6.0 2.0232674989 -2.9868591595 -0.5933354795  |
|             |            | C 6.0 -6.9589807682 -7.7218315034 -0.4411006647 |
|             |            | C 6.0 5.4813695619 -0.7386974008 -2.0886299586  |
|             |            | H 1.0 1.4624348793 -3.6421587417 0.0780275253   |
|             |            | H 1.0 -0.5729855679 -4.0398840259 -1.5749808605 |
|             |            | H 1.0 5.3065775549 -1.3498743885 -1.1968676418  |
|             |            | H 1.0 -6.2573898856 -4.9350211764 -1.9998885082 |
|             |            | H 1.0 3.0544765931 -2.9333099156 -0.2349954057  |
|             |            | H 1.0 -1.9241585955 -5.5484703225 -0.2083127917 |
|             |            | C 6.0 -6.5014334506 -8.4877408038 0.6965930723  |
|             |            | H 1.0 -7.5173028102 -6.0380599384 -2.4065507261 |
|             |            | H 1.0 -4.6260110524 -8.6987685526 1.6757943655  |
|             |            | H 1.0 -7.7496522281 -8.1566045024 -1.0466499808 |
|             |            | H 1.0 2.0312590046 -3.4220536279 -1.5983864274  |
|             |            | H 1.0 6.3388305899 -1.1705997842 -2.6165843438  |
|             |            | O 8.0 -6.9894250761 -9.5590912009 1.0503381374  |
| Aclarubicin | 57576-44-0 | H 1.0 6.2825965797 -2.7170210918 1.1027379867   |
|             |            | H 1.0 5.9269260085 -2.7240940140 -1.3370344154  |
|             |            | H 1.0 4.5421727951 -2.8012405803 0.7621800100   |
|             |            | C 6.0 5.4307576621 -2.1709066393 0.6823685020   |
|             |            | H 1.0 -1.7543881822 -3.1983178499 1.3499956102  |
|             |            | C 6.0 5.6985607526 -1.8053228749 -0.7803013854  |
|             |            | H 1.0 -1.2848345308 -3.5968241287 -0.3297139071 |
|             |            | H 1.0 -6.7186700392 -1.6778388664 5.9529393724  |
|             |            | H 1.0 8.3997214796 -1.3308898744 -5.5619233537  |
|             |            | H 1.0 -2.9928730637 -3.3941005664 0.1153784620  |
|             |            | H 1.0 6.5817374732 -1.1627107824 -0.8484882420  |
|             |            | H 1.0 5.2739166895 -1.2832965856 1.3043904453   |
|             |            | C 6.0 -1.9839514911 -3.0129941276 0.2996454986  |
|             |            | H 1.0 -0.5163572680 -1.5307481157 4.0778540444  |
|             |            | O 8.0 3.3992198360 -1.9883417348 -1.3480538447  |
|             |            | H 1.0 2.0490671626 -1.6039850447 3.4164827418   |
|             |            | H 1.0 -0.0473742389 -2.1479018332 1.9414051661  |
|             |            | H 1.0 -5.5601039059 -1.5579265505 7.2827097851  |
|             |            | H 1.0 -4.8467795409 -2.6674567049 3.8270280507  |
|             |            | H 1.0 -7.8040663184 -0.9940055401 8.2347365597  |
|             |            | O 8.0 -2.4008838582 -1.7523984545 3.4757441765  |
|             |            | O 8.0 6.8172016885 -1.1658790176 -4.3139411122  |
|             |            | H 1.0 2.5942781438 -1.4508414059 -1.4351901095  |
|             |            | H 1.0 4.7799974879 -2.0000440103 -3.4392087448  |

|   |     |               |               |               |
|---|-----|---------------|---------------|---------------|
| C | 6.0 | -6.2585230944 | -0.9849617724 | 6.6642022539  |
| C | 6.0 | 8.0761146948  | -0.6535537696 | -4.7713666209 |
| H | 1.0 | -1.8408911572 | -0.1590169297 | 5.6009182406  |
| C | 6.0 | 4.5247309692  | -1.1109283324 | -1.5016364366 |
| H | 1.0 | -4.3069973869 | -2.9718816959 | 2.1622797837  |
| C | 6.0 | -1.2922868250 | -0.8808762031 | 3.6545955534  |
| H | 1.0 | 8.8063771641  | -0.6342957413 | -3.9576362121 |
| H | 1.0 | 0.1052734807  | -1.6565205339 | -0.4760461829 |
| C | 6.0 | -7.3300651582 | -0.3043666580 | 7.5313222650  |
| H | 1.0 | -8.1340090097 | 0.0798697122  | 6.8847052776  |
| H | 1.0 | 1.9945528574  | -1.2680683572 | 0.9369125552  |
| C | 6.0 | 2.0469466533  | -0.5991040767 | 2.9809176101  |
| C | 6.0 | -4.6504998439 | -2.2037697473 | 2.8578213380  |
| C | 6.0 | -0.0445780540 | -1.1116596876 | 1.5828780468  |
| O | 8.0 | -4.4413778002 | -0.5619749345 | 5.1872653477  |
| H | 1.0 | 3.0815096735  | -0.2528405130 | 2.9127482994  |
| C | 6.0 | 4.8302116896  | -0.9880898549 | -3.0281674339 |
| H | 1.0 | 7.9587708483  | 0.3598630953  | -5.1629386071 |
| N | 7.0 | -1.9525188185 | -1.5793389908 | 0.0078923473  |
| C | 6.0 | -1.6357047036 | 0.2641154625  | 4.6116288346  |
| C | 6.0 | 6.2225158508  | -0.4454497570 | -3.3308172600 |
| C | 6.0 | -3.5967611057 | -1.1143311107 | 2.9943296139  |
| H | 1.0 | 4.0316467028  | 0.2352033711  | 0.1430573319  |
| C | 6.0 | 1.4141607174  | -0.6067720508 | 1.5971375912  |
| C | 6.0 | -0.5834251216 | -1.0415927100 | 0.1354025321  |
| H | 1.0 | -1.9305676681 | -1.7457119533 | -2.1437452675 |
| C | 6.0 | -5.4430740810 | 0.0575623763  | 5.9106469456  |
| H | 1.0 | 1.5032885717  | 0.0790931063  | 3.6436348396  |
| H | 1.0 | -0.7884077948 | 0.9494552292  | 4.6922735024  |
| O | 8.0 | -0.8493908390 | -0.3002392849 | 2.4507001672  |
| H | 1.0 | -3.5213006377 | -1.8146813359 | -1.3529852084 |
| C | 6.0 | 4.2162263212  | 0.2842666702  | -0.9332739237 |
| H | 1.0 | -6.0849157123 | 0.6624989836  | 5.2487553974  |
| H | 1.0 | -5.5852359862 | -1.7831884951 | 2.4711507771  |
| C | 6.0 | -2.5368246976 | -1.3387337554 | -1.3131079869 |
| C | 6.0 | -4.0293190738 | 0.0271257336  | 3.9298933226  |
| H | 1.0 | -3.3836149837 | -0.6810652555 | 2.0087503130  |
| H | 1.0 | 4.3926710351  | -0.8972503469 | -5.7241701715 |
| H | 1.0 | 5.0875244998  | 0.9237336275  | -1.1059549260 |
| C | 6.0 | -6.8179848376 | 0.8974359731  | 8.3154068692  |
| O | 8.0 | 1.7673147968  | 0.2516038781  | -1.1745010450 |
| O | 8.0 | 6.7586661542  | 0.5162256055  | -2.8143174732 |
| C | 6.0 | 3.8397756908  | -0.1018378105 | -3.7925757823 |
| C | 6.0 | -2.8740415622 | 1.0222003441  | 4.1216755992  |

|   |     |               |               |                |
|---|-----|---------------|---------------|----------------|
| O | 8.0 | -7.2992195521 | 1.2348014735  | 9.3797285584   |
| O | 8.0 | -4.8192352703 | 0.9237056635  | 6.8838572200   |
| H | 1.0 | -7.0140310338 | 2.5969530916  | 6.1170529595   |
| C | 6.0 | 3.7782726298  | -0.1901003595 | -5.1769872056  |
| O | 8.0 | 1.4963058836  | 0.7377418538  | 1.1116325302   |
| H | 1.0 | -3.5150749799 | 1.7537320989  | 5.8040067858   |
| C | 6.0 | 3.0012097482  | 0.9258088792  | -1.6066864828  |
| H | 1.0 | -4.8910063915 | 0.5481307334  | 3.4876742637   |
| C | 6.0 | -0.4508942954 | 0.4120842025  | -0.3418147363  |
| H | 1.0 | -2.6816123070 | -0.2720334098 | -1.4901293943  |
| C | 6.0 | 0.9894030715  | 0.9128712007  | -0.2044662156  |
| O | 8.0 | -3.2183738473 | 2.1175826809  | 4.9514316747   |
| H | 1.0 | -0.7180799933 | 0.5257191285  | -1.3930248969  |
| C | 6.0 | 3.0332625504  | 0.8372480562  | -3.1060080761  |
| C | 6.0 | -5.7075492386 | 1.7341706527  | 7.6653934282   |
| H | 1.0 | -2.6548846442 | 1.4498494713  | 3.1375830813   |
| H | 1.0 | -1.1055193583 | 1.0507688013  | 0.2590095050   |
| C | 6.0 | -6.2894084178 | 2.9159595531  | 6.8724607622   |
| H | 1.0 | 2.9142554193  | 1.9723640810  | -1.2964359520  |
| O | 8.0 | 3.6260325981  | -0.3144309417 | -7.9892477722  |
| C | 6.0 | 2.9229315945  | 0.6368524247  | -5.9257150401  |
| H | 1.0 | -5.0906644467 | 2.1249112446  | 8.4794996579   |
| H | 1.0 | -5.4781848713 | 3.4413124810  | 6.3617825762   |
| H | 1.0 | -6.7945050982 | 3.6040118109  | 7.5555797928   |
| H | 1.0 | 1.0347662620  | 1.9927109503  | -0.3797268609  |
| C | 6.0 | 2.8998789327  | 0.5106561576  | -7.3891843977  |
| C | 6.0 | 2.1607170708  | 1.6560174193  | -3.8320393711  |
| C | 6.0 | 2.0962404586  | 1.5850965543  | -5.2554627169  |
| O | 8.0 | 1.3713029725  | 2.5173842548  | -3.1568314110  |
| H | 1.0 | 2.5597334624  | 0.5990295681  | -10.0058545186 |
| C | 6.0 | 1.9818081092  | 1.4042122456  | -8.1131589338  |
| C | 6.0 | 1.9192514280  | 1.3245114876  | -9.5167306624  |
| H | 1.0 | 0.8539174628  | 3.0076371589  | -3.8766552061  |
| C | 6.0 | 1.2015936186  | 2.4475221613  | -5.9826643812  |
| C | 6.0 | 1.1591123718  | 2.3425080330  | -7.4196938071  |
| C | 6.0 | 1.0636984020  | 2.1515121402  | -10.2271618415 |
| O | 8.0 | 0.4468501477  | 3.3062390487  | -5.3490045917  |
| H | 1.0 | 1.0200022254  | 2.0847849640  | -11.3121928574 |
| C | 6.0 | 0.2838225300  | 3.1852191707  | -8.1776087254  |
| C | 6.0 | 0.2451454590  | 3.0818633832  | -9.5657435098  |
| O | 8.0 | -0.5120096808 | 4.0867458343  | -7.5646830419  |
| H | 1.0 | -0.4287816395 | 3.7350153992  | -10.1117317868 |
| H | 1.0 | -0.3167495303 | 3.9840216298  | -6.5873868960  |

|                         |            |               |               |               |               |               |
|-------------------------|------------|---------------|---------------|---------------|---------------|---------------|
| Adriamycin 14-octanoate | 51898-39-6 | H             | 1.0           | 5.7078906790  | 1.0529375339  | -2.0139084597 |
|                         |            | O             | 8.0           | 6.3926492958  | -1.3902437872 | -1.7223178658 |
|                         |            | H             | 1.0           | 4.0370766933  | 0.6769319692  | -1.5473616181 |
|                         |            | C             | 6.0           | 5.0844028474  | 0.6009485471  | -1.2377297977 |
|                         |            | H             | 1.0           | 4.9423746458  | -3.3868913582 | -1.2723279100 |
|                         |            | H             | 1.0           | 5.5790923524  | 3.3056902381  | -0.7115977451 |
|                         |            | H             | 1.0           | 0.1757778724  | -2.0621722478 | -4.4814012385 |
|                         |            | C             | 6.0           | 5.4482572597  | -0.8665217966 | -1.1720541592 |
|                         |            | H             | 1.0           | 3.8018246404  | 5.1761671182  | -0.8761307836 |
|                         |            | H             | 1.0           | 5.6953564144  | -3.1566794614 | 0.3093288342  |
|                         |            | H             | 1.0           | 1.9898341384  | 7.0439305254  | -1.0594261247 |
|                         |            | H             | 1.0           | 3.1621974268  | 2.7604001523  | -1.1471140678 |
|                         |            | O             | 8.0           | 0.7174864556  | -2.3638385491 | -3.6772441779 |
|                         |            | H             | 1.0           | -2.6259567888 | -0.1621805041 | -6.4697894535 |
|                         |            | O             | 8.0           | -0.9645103919 | -1.2789475593 | -5.1918542601 |
|                         |            | H             | 1.0           | 1.3963013441  | 4.5990500113  | -1.3316961956 |
|                         |            | C             | 6.0           | 4.7911717508  | -2.9631264867 | -0.2724644906 |
|                         |            | C             | 6.0           | 4.9659346100  | 2.8232560155  | 0.0634290115  |
|                         |            | O             | 8.0           | 4.5722449232  | -1.5457556048 | -0.3886347492 |
|                         |            | C             | 6.0           | 3.1879255305  | 4.6573819287  | -0.1248812894 |
|                         |            | C             | 6.0           | 5.2920538354  | 1.3220902798  | 0.1095413360  |
|                         |            | H             | 1.0           | 1.6960980201  | -3.7755454729 | -1.7605394737 |
|                         |            | H             | 1.0           | 2.6798174884  | -2.3316863845 | -1.6607733463 |
|                         |            | H             | 1.0           | 6.3369790927  | 1.1915307382  | 0.4186789996  |
|                         |            | C             | 6.0           | 3.4862321707  | 3.1537073000  | -0.1750970105 |
|                         |            | C             | 6.0           | 1.4183629039  | 6.4979899886  | -0.2992991760 |
|                         |            | C             | 6.0           | 1.7103515959  | 4.9956789511  | -0.3576072936 |
|                         |            | H             | 1.0           | -4.6030224802 | 1.3089604517  | -6.9204733511 |
|                         |            | H             | 1.0           | 0.3568933910  | 6.7047253355  | -0.4693701871 |
|                         |            | C             | 6.0           | -3.1510709178 | 0.3481511754  | -5.6706188758 |
|                         |            | C             | 6.0           | -1.5205217181 | -0.7186699775 | -4.1808034458 |
|                         |            | H             | 1.0           | 5.2789328738  | 3.2714448491  | 1.0164415153  |
|                         |            | C             | 6.0           | 0.1033555110  | -1.7653227231 | -2.6311031494 |
|                         |            | C             | 6.0           | 1.8353887349  | -2.8499279804 | -1.1923678578 |
|                         |            | H             | 1.0           | 3.5032600878  | 5.0579925892  | 0.8500753712  |
|                         |            | C             | 6.0           | 3.6310297850  | -3.7069697931 | 0.4067043489  |
| H                       | 1.0        | 1.6871179997  | 6.9168078811  | 0.6778771043  |               |               |
| C                       | 6.0        | -4.2375378374 | 1.1579311546  | -5.9074033091 |               |               |
| H                       | 1.0        | 4.6766513099  | 0.8352518103  | 0.8749370585  |               |               |
| H                       | 1.0        | 2.8749347543  | 2.6374800014  | 0.5781297694  |               |               |
| C                       | 6.0        | -2.6757841406 | 0.1512987178  | -4.3541379690 |               |               |
| H                       | 1.0        | 1.0974645600  | 4.4742782076  | 0.3889604390  |               |               |
| C                       | 6.0        | -1.0252417420 | -0.9266131305 | -2.8409831012 |               |               |
| O                       | 8.0        | 3.9355703164  | -4.7106765018 | 1.0186435619  |               |               |

|   |     |               |               |               |
|---|-----|---------------|---------------|---------------|
| C | 6.0 | 0.6070033421  | -1.9764963900 | -1.3412374713 |
| C | 6.0 | 2.1645041292  | -3.2394263750 | 0.2693658404  |
| O | 8.0 | 1.3617683755  | -4.3353946005 | 0.6710812389  |
| H | 1.0 | 2.6078042469  | -1.2106482875 | 0.9161274114  |
| C | 6.0 | -4.8915111043 | 1.8025540006  | -4.8373285711 |
| C | 6.0 | -3.3166238092 | 0.7915347056  | -3.2420285335 |
| C | 6.0 | -1.6548872226 | -0.2927473673 | -1.7305585737 |
| H | 1.0 | -5.7447510546 | 2.4363353670  | -5.0449944414 |
| H | 1.0 | 0.6071848147  | -3.9793853771 | 1.1688490944  |
| C | 6.0 | 1.9461044612  | -2.0289688812 | 1.2115101010  |
| C | 6.0 | -0.0100304568 | -1.3422199067 | -0.2441911524 |
| C | 6.0 | -4.4465401431 | 1.6273544081  | -3.5313371729 |
| C | 6.0 | -2.8101741395 | 0.5780436590  | -1.8897558821 |
| H | 1.0 | 2.1825878459  | -2.3143098127 | 2.2409735738  |
| C | 6.0 | -1.1335663770 | -0.5209094499 | -0.4286656634 |
| C | 6.0 | 0.4987494071  | -1.5347002135 | 1.1572253568  |
| H | 1.0 | 0.4109431400  | -0.5958823278 | 1.7116751990  |
| O | 8.0 | -5.0589683907 | 2.2375090398  | -2.4729234506 |
| H | 1.0 | -5.9217023728 | 3.9187335595  | -3.3657978103 |
| O | 8.0 | -3.3349586149 | 1.1226905506  | -0.8572362833 |
| O | 8.0 | -0.3578532933 | -2.5151551387 | 1.8395876204  |
| O | 8.0 | -1.7048923827 | 0.0561647744  | 0.6503558909  |
| H | 1.0 | -3.2509839944 | -3.6563581129 | 5.0786632916  |
| C | 6.0 | -6.1732015223 | 3.0631424492  | -2.7221225242 |
| H | 1.0 | -7.0039984118 | 2.5118096163  | -3.1861931342 |
| H | 1.0 | -2.4760675016 | 0.6026674574  | 0.2385067381  |
| H | 1.0 | 0.5376251155  | -2.0195322350 | 5.9970114369  |
| H | 1.0 | -2.8321283923 | -3.0197632767 | 2.6229612753  |
| C | 6.0 | -2.6248832205 | -2.7895689328 | 4.7799605549  |
| C | 6.0 | -0.9325176428 | -2.1004014709 | 3.0372078892  |
| H | 1.0 | -4.2133005863 | -1.6187045676 | 4.2085440128  |
| H | 1.0 | -6.4932341364 | 3.4342563350  | -1.7459516002 |
| N | 7.0 | -3.3742157822 | -1.5331224411 | 4.7748425296  |
| C | 6.0 | -2.0488757071 | -3.0775869136 | 3.3863062099  |
| H | 1.0 | -1.0317331787 | -3.7164427916 | 5.8570664927  |
| C | 6.0 | -0.3240658086 | -1.7684270480 | 5.3666548635  |
| H | 1.0 | -1.3180153020 | -1.0806550897 | 2.9308931727  |
| O | 8.0 | 0.0925818368  | -2.1359748875 | 4.0483943386  |
| C | 6.0 | -1.4708086433 | -2.7088569177 | 5.7967438240  |
| H | 1.0 | 0.3006680490  | 0.2842820549  | 5.2116191713  |
| H | 1.0 | -1.4472309975 | 0.0579237383  | 4.9340618089  |
| C | 6.0 | -0.5906203796 | -0.2687878938 | 5.5240516414  |
| H | 1.0 | -3.6498628868 | -1.3020542342 | 5.7253028541  |
| H | 1.0 | -1.6306886328 | -4.0904619963 | 3.3569018914  |

|         |            |   |     |               |               |               |
|---------|------------|---|-----|---------------|---------------|---------------|
|         |            | O | 8.0 | -1.9315552541 | -2.2983790714 | 7.0903850742  |
|         |            | H | 1.0 | -0.7933228511 | -0.0401545368 | 6.5745199161  |
|         |            | H | 1.0 | -2.4655885152 | -3.0215060386 | 7.4452577289  |
|         |            | H | 1.0 | 4.9461018233  | 0.0416232751  | -5.0236848023 |
|         |            | H | 1.0 | 2.5002333315  | -3.3884080744 | -2.1388641430 |
|         |            | C | 6.0 | 4.9713713868  | 0.0088115830  | -3.9342618041 |
|         |            | H | 1.0 | 3.0659253148  | -5.1756411055 | -0.5318454350 |
|         |            | O | 8.0 | 3.6596400597  | -0.4046540101 | -3.5287282638 |
|         |            | H | 1.0 | 5.2052167906  | 0.9964830999  | -3.5292278021 |
|         |            | H | 1.0 | 5.7271659845  | -0.7015008894 | -3.5877107643 |
|         |            | H | 1.0 | 3.7482690468  | -2.8146084353 | -1.0348446764 |
|         |            | C | 6.0 | 2.6960893220  | -3.1106254577 | -1.0944755958 |
|         |            | H | 1.0 | 1.5481133392  | -1.1734362691 | -2.7809704811 |
|         |            | C | 6.0 | 2.4473209210  | -4.3322614375 | -0.2051685515 |
|         |            | H | 1.0 | 1.3985629608  | -4.6339813848 | -0.2530382418 |
|         |            | C | 6.0 | 3.4684254516  | -0.4886663802 | -2.1884283470 |
|         |            | C | 6.0 | 2.0084022641  | -0.7870759858 | -1.8676145694 |
|         |            | H | 1.0 | 2.6944309364  | -4.1328154927 | 0.8427010042  |
|         |            | C | 6.0 | 1.8179297638  | -1.8835195222 | -0.7728573966 |
|         |            | H | 1.0 | 1.3621697019  | 1.2528319498  | -3.5669779694 |
|         |            | O | 8.0 | 0.4601936046  | -2.3427317920 | -0.8474117956 |
|         |            | O | 8.0 | 4.3691811820  | -0.3094012320 | -1.3912121731 |
|         |            | H | 1.0 | -0.0781210133 | -1.7563261430 | -0.2898927051 |
|         |            | O | 8.0 | 0.6286954828  | 3.3881819829  | -4.5462824289 |
|         |            | C | 6.0 | 1.1182053856  | 1.4763093613  | -2.5337872461 |
|         |            | C | 6.0 | 1.3513652422  | 0.5539176565  | -1.5225220516 |
|         |            | H | 1.0 | -4.9073345487 | -2.3242674003 | 0.4221404257  |
|         |            | H | 1.0 | -0.5490196969 | -5.2335850871 | 2.9746048871  |
|         |            | C | 6.0 | 2.1185416894  | -1.2786439517 | 0.6084041647  |
|         |            | H | 1.0 | 3.1497927298  | -0.9123284515 | 0.6040990762  |
|         |            | H | 1.0 | 2.0225359702  | -2.0325296565 | 1.3943888646  |
|         |            | H | 1.0 | -0.4348404618 | -3.1789174251 | 1.5692492238  |
|         |            | H | 1.0 | -2.6037329457 | -3.8835705598 | 2.0856339206  |
|         |            | H | 1.0 | -4.6210734242 | -3.6002727124 | 1.6268179474  |
|         |            | C | 6.0 | -4.9835333990 | -2.5788123558 | 1.4946792209  |
|         |            | H | 1.0 | -2.5847819201 | -1.7027177146 | 0.9997559499  |
|         |            | C | 6.0 | 0.3334218870  | 3.6783104733  | -3.3644404276 |
|         |            | H | 1.0 | -6.0420031601 | -2.5634780458 | 1.7731457616  |
|         |            | C | 6.0 | 0.5595638702  | 2.7366359239  | -2.2595981578 |
|         |            | H | 1.0 | 0.9336550832  | -4.3170614084 | 3.3163406481  |
|         |            | H | 1.0 | -0.2270828760 | 5.6371298129  | -5.0434796432 |
|         |            | C | 6.0 | -0.1570743597 | -4.2998594900 | 3.3910536037  |
|         |            | C | 6.0 | 1.0316297328  | 0.8755885370  | -0.1816644658 |
| Aklavin | 60504-57-6 |   |     |               |               |               |

|                              |            |   |     |               |               |               |
|------------------------------|------------|---|-----|---------------|---------------|---------------|
|                              |            | C | 6.0 | -0.7108636268 | -3.1027630767 | 2.6309029395  |
|                              |            | C | 6.0 | 1.1867893327  | -0.1108179289 | 0.9412655827  |
|                              |            | H | 1.0 | -4.7239350022 | 0.1294490771  | 1.2339565167  |
|                              |            | O | 8.0 | -0.1625703525 | -0.6075657837 | 1.2455499112  |
|                              |            | C | 6.0 | -2.2440063580 | -3.0319000222 | 2.6898058810  |
|                              |            | C | 6.0 | -2.7816047353 | -1.7088857944 | 2.0852080052  |
|                              |            | H | 1.0 | -0.4427446347 | -4.2387059114 | 4.4432567641  |
|                              |            | C | 6.0 | -0.4941055144 | 5.9189872686  | -4.0310220142 |
|                              |            | N | 7.0 | -4.2427647314 | -1.6489875357 | 2.3493538454  |
|                              |            | C | 6.0 | -0.2563142946 | 4.9792569051  | -3.0108939689 |
|                              |            | C | 6.0 | 0.2233589787  | 3.0810315420  | -0.9178639496 |
|                              |            | C | 6.0 | -4.8315908154 | -0.3130489348 | 2.2399933658  |
|                              |            | H | 1.0 | 1.5431823084  | 0.4033530611  | 1.8404520446  |
|                              |            | C | 6.0 | 0.4599183957  | 2.1195508535  | 0.1097961868  |
|                              |            | H | 1.0 | -5.9010890639 | -0.3835860410 | 2.4627466907  |
|                              |            | O | 8.0 | -0.0838484673 | -1.9399772891 | 3.1893361493  |
|                              |            | O | 8.0 | -2.7016440908 | -3.1540919282 | 4.0273442761  |
|                              |            | C | 6.0 | -0.5098031316 | -0.7208682853 | 2.6076925033  |
|                              |            | C | 6.0 | -2.0236503965 | -0.5372567103 | 2.7229326777  |
|                              |            | H | 1.0 | -2.2685257468 | 0.4158001700  | 2.2505984617  |
|                              |            | H | 1.0 | -1.2308042317 | 7.8743983933  | -4.5241312465 |
|                              |            | H | 1.0 | -4.3875121214 | 0.3707682843  | 2.9637476722  |
|                              |            | C | 6.0 | -1.0498755760 | 7.1524280303  | -3.7306002987 |
|                              |            | H | 1.0 | -3.5642426927 | -2.6985580866 | 4.0147541279  |
|                              |            | C | 6.0 | -0.5899004676 | 5.3000436232  | -1.6603253979 |
|                              |            | C | 6.0 | -0.3572880992 | 4.3582800032  | -0.5941154793 |
|                              |            | H | 1.0 | 0.0063047835  | 0.0596185632  | 3.1770736774  |
|                              |            | O | 8.0 | 0.1271816483  | 2.3942725131  | 1.3885323705  |
|                              |            | H | 1.0 | -2.2731510535 | -0.4822150022 | 3.7877527177  |
|                              |            | H | 1.0 | -0.2421377659 | 3.3366756764  | 1.3592364925  |
|                              |            | C | 6.0 | -1.3865514249 | 7.4893350769  | -2.4091128502 |
|                              |            | O | 8.0 | -0.6655539839 | 4.6529440699  | 0.6416188992  |
|                              |            | C | 6.0 | -1.1639598623 | 6.5811275155  | -1.3773068806 |
|                              |            | H | 1.0 | -1.8227259326 | 8.4522771700  | -2.1613228397 |
|                              |            | H | 1.0 | -1.2502041534 | 6.1342411507  | 0.4448130081  |
|                              |            | O | 8.0 | -1.4965313962 | 6.9274089430  | -0.1157303442 |
|                              |            | H | 1.0 | 7.3762858800  | -1.7832195746 | 2.1658179681  |
|                              |            | H | 1.0 | 7.3087839084  | -2.3262603203 | -0.2386294301 |
|                              |            | H | 1.0 | 7.3044704959  | -1.8489885084 | -2.4358400136 |
|                              |            | H | 1.0 | 6.5595051285  | -3.4247574797 | -2.0535652498 |
|                              |            | C | 6.0 | 6.4987249401  | -1.5105470402 | 1.5842779900  |
|                              |            | C | 6.0 | 6.4622500728  | -1.8215851082 | 0.2100631381  |
|                              |            | C | 6.0 | 6.3761089835  | -2.4352854013 | -2.4970897735 |
| 2'-Bromo-4'-epi-daunorubicin | NSC 650931 | H | 1.0 | 7.3762858800  | -1.7832195746 | 2.1658179681  |
|                              |            | H | 1.0 | 7.3087839084  | -2.3262603203 | -0.2386294301 |
|                              |            | H | 1.0 | 7.3044704959  | -1.8489885084 | -2.4358400136 |
|                              |            | H | 1.0 | 6.5595051285  | -3.4247574797 | -2.0535652498 |
|                              |            | C | 6.0 | 6.4987249401  | -1.5105470402 | 1.5842779900  |
|                              |            | C | 6.0 | 6.4622500728  | -1.8215851082 | 0.2100631381  |
|                              |            | C | 6.0 | 6.3761089835  | -2.4352854013 | -2.4970897735 |



|    |      |               |               |               |
|----|------|---------------|---------------|---------------|
| H  | 1.0  | 6.1029724810  | -2.5606144502 | -3.5471130587 |
| H  | 1.0  | 5.4313241876  | -0.6165593290 | 3.2336607512  |
| C  | 6.0  | 5.4366380752  | -0.8705039777 | 2.1800190859  |
| C  | 6.0  | 5.3539764372  | -1.4848849884 | -0.5603611517 |
| O  | 8.0  | 5.2873751549  | -1.7744511220 | -1.8935089711 |
| C  | 6.0  | 4.2973408143  | -0.5167323016 | 1.4226707352  |
| C  | 6.0  | 4.2270147309  | -0.8155661850 | 0.0232352621  |
| O  | 8.0  | 3.3012873582  | 0.4176773883  | 3.3728201672  |
| C  | 6.0  | 3.2104849415  | 0.1578293546  | 2.1203148079  |
| C  | 6.0  | 3.0417479949  | -0.4373976277 | -0.7417451098 |
| O  | 8.0  | 2.9260292380  | -0.6688925075 | -1.9951963079 |
| C  | 6.0  | 2.0380950416  | 0.5196993477  | 1.3606512900  |
| H  | 1.0  | 1.9358560528  | 1.1077351411  | 3.6117030189  |
| C  | 6.0  | 1.9590025181  | 0.2262762972  | -0.0314081249 |
| H  | 1.0  | 1.6019617900  | -0.0840694290 | -2.2922297334 |
| O  | 8.0  | 1.0196990936  | 1.4496332595  | 3.3356610279  |
| C  | 6.0  | 0.9537679542  | 1.1732726874  | 2.0142111170  |
| C  | 6.0  | 0.7846758914  | 0.5970979295  | -0.7499472132 |
| O  | 8.0  | 0.6937916018  | 0.3551741247  | -2.0752144508 |
| C  | 6.0  | -0.1908222230 | 1.5258191933  | 1.2938277386  |
| C  | 6.0  | -0.2791981864 | 1.2197200022  | -0.0819326207 |
| H  | 1.0  | -0.8640554320 | -2.8646057285 | -1.1626457005 |
| H  | 1.0  | -0.2134157354 | -1.9107102588 | -2.5180608968 |
| H  | 1.0  | -2.9174832358 | -3.1595369380 | 1.2213622307  |
| H  | 1.0  | -0.7884995154 | -3.5759556837 | -2.7784023259 |
| H  | 1.0  | -1.6646627731 | -0.9035056207 | -0.3307749904 |
| C  | 6.0  | -0.9664527057 | -2.6461522027 | -2.2253881197 |
| H  | 1.0  | -2.9176231211 | -4.4020199244 | 0.1484137874  |
| N  | 7.0  | -2.8081957609 | -3.3957431595 | 0.2379454985  |
| H  | 1.0  | -0.9614826702 | 2.7096028783  | 2.8811268421  |
| O  | 8.0  | -1.2743079036 | 5.3324163968  | 1.2168103314  |
| C  | 6.0  | -1.3479489783 | 2.1833317294  | 2.0025984977  |
| H  | 1.0  | -1.3092535676 | 1.6474135645  | -1.9061547803 |
| C  | 6.0  | -1.4970399660 | 1.6822673749  | -0.8316474494 |
| H  | 1.0  | -2.0251430831 | 1.4134004121  | 2.3935268661  |
| C  | 6.0  | -2.0950581544 | 4.5567735927  | 1.6724781713  |
| C  | 6.0  | -2.5772883294 | -0.5016155718 | -0.7839883449 |
| H  | 1.0  | -1.0510641392 | 3.7565806137  | -0.5600871334 |
| BR | 35.0 | -4.0763499097 | -0.8646977954 | 1.6928571053  |
| H  | 1.0  | -2.6725684058 | 5.9053857182  | 3.2330691487  |
| O  | 8.0  | -2.6996337754 | 0.8578206841  | -0.5718712438 |
| C  | 6.0  | -2.3541600854 | -2.1126805583 | -2.5794898263 |
| C  | 6.0  | -2.2530948934 | 3.1271056582  | 1.1240133697  |
| C  | 6.0  | -1.8900548291 | 3.0819021669  | -0.3726106047 |

|             |                            |   |     |               |               |               |
|-------------|----------------------------|---|-----|---------------|---------------|---------------|
|             |                            | C | 6.0 | -3.8315573101 | -2.7083644574 | -0.5473523478 |
|             |                            | H | 1.0 | -2.9712283025 | 4.1755044731  | 3.6159550293  |
|             |                            | O | 8.0 | -2.5756301076 | -0.7375994410 | -2.2007110131 |
|             |                            | C | 6.0 | -2.9919059644 | 4.9409135254  | 2.8347794298  |
|             |                            | C | 6.0 | -3.8298158142 | -1.2017531553 | -0.2537410135 |
|             |                            | H | 1.0 | -3.4360596165 | -3.9814020447 | -2.2620353196 |
|             |                            | C | 6.0 | -3.5711506663 | -2.9094091473 | -2.0697532234 |
|             |                            | H | 1.0 | -2.4435309907 | -2.0857475338 | -3.6719050226 |
|             |                            | H | 1.0 | -4.8534742388 | -3.0762333966 | -0.3593914165 |
|             |                            | H | 1.0 | -2.7553783806 | 3.4463974016  | -0.9367489741 |
|             |                            | H | 1.0 | -3.7317487366 | 1.8955727986  | 0.9641330696  |
|             |                            | H | 1.0 | -4.7020975552 | -0.7305169846 | -0.7062506075 |
|             |                            | O | 8.0 | -3.6334310570 | 2.7939821882  | 1.3174674684  |
|             |                            | H | 1.0 | -4.0273243349 | 4.9964056992  | 2.4858440093  |
|             |                            | O | 8.0 | -4.7320999754 | -2.5108486677 | -2.7998565187 |
|             |                            | H | 1.0 | -4.6319789462 | -1.5559990963 | -2.9359028268 |
| Cinerubin A | NSC 243022 /<br>34044-10-5 | H | 1.0 | 8.6450430776  | 0.6769188219  | -5.8562400886 |
|             |                            | H | 1.0 | 6.9629260196  | 0.5818148037  | -5.2864583551 |
|             |                            | C | 6.0 | 7.9668361914  | 0.9360071367  | -5.0386373335 |
|             |                            | H | 1.0 | 7.9365686259  | 2.0268549775  | -4.9534035399 |
|             |                            | H | 1.0 | 8.4842660118  | -0.8169533167 | -3.9003276800 |
|             |                            | O | 8.0 | 10.8225466435 | 0.1832157178  | -3.9333465878 |
|             |                            | C | 6.0 | 8.4422772809  | 0.2640707510  | -3.7407612502 |
|             |                            | C | 6.0 | 9.8696945704  | 0.7103230727  | -3.3932304140 |
|             |                            | H | 1.0 | -8.9232922076 | -1.5016477493 | -2.8090605763 |
|             |                            | O | 8.0 | 7.5249342316  | 0.4437207238  | -2.6541150623 |
|             |                            | H | 1.0 | 9.9596968435  | 2.7889339708  | -3.0456334453 |
|             |                            | H | 1.0 | 7.3144244342  | 2.5163687210  | -2.6927972651 |
|             |                            | C | 6.0 | 10.0176977103 | 1.8780259720  | -2.4297917152 |
|             |                            | H | 1.0 | 5.2437356576  | 3.0385313581  | -1.7044504329 |
|             |                            | H | 1.0 | -8.2204718077 | -3.0446957267 | -2.2212043412 |
|             |                            | C | 6.0 | -8.5492001140 | -2.0420497526 | -1.9389038801 |
|             |                            | H | 1.0 | -1.0832067128 | 1.9725046580  | -2.6615431668 |
|             |                            | H | 1.0 | 11.0261420369 | 1.8511073991  | -2.0090626654 |
|             |                            | H | 1.0 | 2.9626341299  | 2.3691341306  | -2.9286836875 |
|             |                            | C | 6.0 | 7.5518043753  | 1.7120437472  | -1.9735720392 |
|             |                            | H | 1.0 | -9.3289765478 | -2.1306090206 | -1.1778767916 |
|             |                            | H | 1.0 | 4.8346697913  | 2.9258077305  | 0.6044048421  |
|             |                            | H | 1.0 | -2.6498587839 | 1.3183669312  | -2.1404215907 |
|             |                            | O | 8.0 | -7.4399228222 | -1.2719511138 | -1.4495695132 |
|             |                            | C | 6.0 | 8.9257279702  | 1.9194153059  | -1.3510011539 |
|             |                            | C | 6.0 | 5.2499502561  | 2.0177689776  | -1.2903142622 |
|             |                            | C | 6.0 | -1.7629406891 | 1.8680134903  | -1.8106574194 |
|             |                            | H | 1.0 | 0.8845559479  | 4.0409032094  | -1.5262933659 |

|   |     |               |               |               |
|---|-----|---------------|---------------|---------------|
| O | 8.0 | 3.1075831775  | 2.3661791415  | -0.2390537853 |
| H | 1.0 | 5.0779662994  | 1.2986470409  | -3.3173593635 |
| C | 6.0 | 4.4757180472  | 2.0544513929  | 0.0451026466  |
| C | 6.0 | 3.1103410078  | 1.3911644833  | -2.4574551530 |
| O | 8.0 | 6.6046561512  | 1.6573245349  | -0.9634448191 |
| H | 1.0 | 9.0714524523  | 1.1208522736  | -0.6161339862 |
| H | 1.0 | -2.0492532717 | 2.8677771531  | -1.4825182903 |
| O | 8.0 | 1.1264595275  | 1.8756623477  | -1.2693949400 |
| H | 1.0 | -0.8092408168 | 0.0932357578  | -1.0941578810 |
| C | 6.0 | 4.6070392464  | 1.0891679877  | -2.3433486038 |
| H | 1.0 | -5.2710073486 | -0.4451213486 | -0.8320434444 |
| H | 1.0 | 8.9441451633  | 2.8723190325  | -0.8131596072 |
| H | 1.0 | 0.0426510536  | 5.5935486923  | -1.3373367422 |
| C | 6.0 | 2.4331291621  | 1.4313144567  | -1.0930769479 |
| H | 1.0 | -7.4999324134 | 0.5904762097  | -0.6718690622 |
| H | 1.0 | 2.6397544473  | 0.6324107794  | -3.0889227282 |
| O | 8.0 | -3.4503488289 | -5.4831604999 | -0.1698553557 |
| H | 1.0 | -4.7437584144 | -3.4237616406 | -0.2410729405 |
| C | 6.0 | 0.5053563663  | 4.7569395817  | -0.8023358061 |
| H | 1.0 | -2.7345866468 | -6.8736538545 | -0.1705165451 |
| C | 6.0 | -1.0726941607 | 1.0790535428  | -0.6944687741 |
| C | 6.0 | -6.8017446054 | -1.8057410118 | -0.3500761822 |
| O | 8.0 | -2.0730007417 | -7.5583537870 | 0.1751447643  |
| O | 8.0 | -7.0415867559 | 1.1848996663  | -0.0595013529 |
| H | 1.0 | 1.3681323706  | 5.1509369724  | -0.2305435627 |
| C | 6.0 | -5.6831240475 | -0.8706266416 | 0.0927062427  |
| C | 6.0 | 0.2381958544  | 1.6904459332  | -0.1528007824 |
| C | 6.0 | 4.6458371020  | 0.8194703102  | 0.9354090052  |
| H | 1.0 | 5.6879892241  | 0.7380859425  | 1.2544603506  |
| H | 1.0 | 4.0168591355  | 0.9311130890  | 1.8232128474  |
| H | 1.0 | 2.4383930907  | 0.4377888829  | -0.6207442485 |
| C | 6.0 | -4.2282712415 | -2.8790205830 | 0.5394292783  |
| H | 1.0 | -4.5485468635 | 1.4686101634  | 0.3010497588  |
| N | 7.0 | -0.4986110036 | 4.1282934730  | 0.0581658811  |
| O | 8.0 | -7.1745821517 | -2.8377599984 | 0.1524989850  |
| O | 8.0 | 4.7659456152  | -0.2806430933 | -2.0182456619 |
| C | 6.0 | -2.8650479142 | -4.9236405956 | 0.8204284653  |
| H | 1.0 | 0.6784619777  | 0.9302961270  | 0.5057488265  |
| H | 1.0 | 5.7229956526  | -0.4404827560 | -2.0034526395 |
| O | 8.0 | -1.9421726880 | 0.7795956921  | 0.4008953710  |
| C | 6.0 | -4.5704015364 | -1.5739827475 | 0.8685054992  |
| C | 6.0 | -6.2804718252 | 0.3751487504  | 0.8455803775  |
| C | 6.0 | -1.4742337454 | -6.9371318150 | 1.2132256920  |
| H | 1.0 | -8.7204325162 | -1.2932306718 | 1.3528329150  |

|                                           |            |   |     |               |               |               |
|-------------------------------------------|------------|---|-----|---------------|---------------|---------------|
|                                           |            | H | 1.0 | 4.3829397816  | -0.1045696942 | 0.4196102370  |
|                                           |            | H | 1.0 | -1.3422165070 | 6.0095100328  | 0.3657619320  |
|                                           |            | C | 6.0 | 0.0273183238  | 2.9304913670  | 0.7567375529  |
|                                           |            | C | 6.0 | -3.2115458648 | -3.5659060459 | 1.2214692713  |
|                                           |            | H | 1.0 | -2.7892505927 | 2.6260127177  | 0.7664897845  |
|                                           |            | H | 1.0 | -0.2257397198 | -8.6167520553 | 1.6436324825  |
|                                           |            | C | 6.0 | -5.0793164102 | 1.2417106820  | 1.2294644520  |
|                                           |            | C | 6.0 | -1.8381658040 | -5.6087894362 | 1.5772775468  |
|                                           |            | H | 1.0 | -9.0859579452 | 0.4458989538  | 1.2584694684  |
|                                           |            | C | 6.0 | -1.0442206263 | 5.1396432384  | 0.9597152526  |
|                                           |            | C | 6.0 | -0.4863994625 | -7.6048678708 | 1.9392383766  |
|                                           |            | H | 1.0 | 1.0045316409  | 3.1683254223  | 1.2158155158  |
|                                           |            | C | 6.0 | -2.2180264193 | 1.8493494112  | 1.3032092006  |
|                                           |            | C | 6.0 | -8.5994755576 | -0.3310539015 | 1.8555835577  |
|                                           |            | H | 1.0 | -5.4436385532 | 2.1902707532  | 1.6393553479  |
|                                           |            | C | 6.0 | -3.8569515550 | -0.8859148559 | 1.8869002282  |
|                                           |            | C | 6.0 | -7.1272629207 | 0.0232459564  | 2.1011793612  |
|                                           |            | H | 1.0 | -1.9353162454 | 4.7792589871  | 1.4769003032  |
|                                           |            | H | 1.0 | -0.3195773089 | 5.4903747281  | 1.7214021284  |
|                                           |            | C | 6.0 | -0.9176828545 | 2.4248871942  | 1.8658350070  |
|                                           |            | C | 6.0 | -2.5484255140 | -2.9353733929 | 2.3110769050  |
|                                           |            | C | 6.0 | -4.1266287968 | 0.5720903880  | 2.2209865146  |
|                                           |            | C | 6.0 | -1.1849310532 | -4.9741453585 | 2.6849355196  |
|                                           |            | H | 1.0 | -6.6332153157 | -0.7868857509 | 2.6482767943  |
|                                           |            | H | 1.0 | -9.1286388717 | -0.4012161714 | 2.8119122953  |
|                                           |            | C | 6.0 | -2.9028963556 | -1.5905421814 | 2.6396112206  |
|                                           |            | H | 1.0 | -0.4324088510 | 1.6082820117  | 2.4092770921  |
|                                           |            | C | 6.0 | 0.1507507333  | -6.9856061762 | 3.0207477882  |
|                                           |            | O | 8.0 | -2.9262671024 | 1.3660735924  | 2.3993858865  |
|                                           |            | H | 1.0 | -7.1017287077 | 0.9039129545  | 2.7556103013  |
|                                           |            | C | 6.0 | -1.5350395158 | -3.6300028876 | 3.0673557980  |
|                                           |            | H | 1.0 | -1.1422998236 | 3.1969376566  | 2.6036788905  |
|                                           |            | C | 6.0 | -0.1809686639 | -5.6866760995 | 3.4042601891  |
|                                           |            | H | 1.0 | 0.9190778542  | -7.5049721011 | 3.5859426028  |
|                                           |            | H | 1.0 | -4.5560179181 | 0.6200490096  | 3.2289752712  |
|                                           |            | O | 8.0 | -0.9449938577 | -3.0486813174 | 4.0756704874  |
|                                           |            | O | 8.0 | -2.3174889942 | -0.9844481279 | 3.6873173941  |
|                                           |            | H | 1.0 | -1.6715542636 | -1.6675900764 | 4.0543876627  |
|                                           |            | O | 8.0 | 0.4627545588  | -5.1285350467 | 4.4579474734  |
|                                           |            | H | 1.0 | 0.0651802427  | -4.2148978376 | 4.5426920784  |
| N-(1-Cyano-2-methoxyethyl)<br>doxorubicin | NSC 639659 | H | 1.0 | 1.8698951923  | -3.5044337255 | -7.0095746463 |
|                                           |            | O | 8.0 | 1.5747809429  | -4.3790750852 | -6.6944325443 |
|                                           |            | H | 1.0 | -0.0073336651 | -4.3843828560 | -5.3358517552 |

|   |     |               |               |               |
|---|-----|---------------|---------------|---------------|
| C | 6.0 | 1.0596997109  | -4.1264532317 | -5.4115618637 |
| O | 8.0 | 1.7205518692  | -1.9004849651 | -5.8655499655 |
| C | 6.0 | 1.2152429181  | -2.6583062537 | -5.0486105861 |
| H | 1.0 | 1.5636235889  | -4.7285826232 | -4.6413557834 |
| H | 1.0 | 0.1561268652  | -0.3637648743 | -4.6547191242 |
| H | 1.0 | 2.5056763143  | -0.9429754853 | -3.4265328629 |
| C | 6.0 | 0.7598101003  | -2.1865141402 | -3.6673491239 |
| H | 1.0 | -1.1796802832 | -1.3598315587 | -4.1140468428 |
| C | 6.0 | -0.1942621969 | -0.9843788056 | -3.8199214607 |
| H | 1.0 | 2.7128202479  | -2.5827395204 | -2.7788426618 |
| C | 6.0 | 2.0109579419  | -1.7475402275 | -2.8735878886 |
| O | 8.0 | -2.1567680312 | 0.9291200689  | -3.6649632024 |
| H | 1.0 | -2.7870007307 | 1.6918200889  | -3.4418591359 |
| O | 8.0 | 0.1130586929  | -3.2993082611 | -3.0559061194 |
| C | 6.0 | -0.3284454528 | -0.1172023607 | -2.5866452028 |
| C | 6.0 | -1.3372124690 | 0.8553633515  | -2.5960789918 |
| C | 6.0 | 1.6432828248  | -1.2568282015 | -1.4738929192 |
| H | 1.0 | 0.2668770517  | -3.2418805212 | -2.0969004328 |
| H | 1.0 | 2.5366938842  | -0.8585090769 | -0.9823330386 |
| C | 6.0 | 0.5513409149  | -0.2063476999 | -1.4846133442 |
| O | 8.0 | -3.3231912927 | 2.8486618313  | -2.5464606832 |
| C | 6.0 | -1.4826528974 | 1.7614157049  | -1.5124903717 |
| O | 8.0 | 1.2316349485  | -2.4535220320 | -0.7303729014 |
| C | 6.0 | -2.5188306315 | 2.7651503754  | -1.5560351681 |
| C | 6.0 | 0.4147795168  | 0.6800575341  | -0.4012023323 |
| C | 6.0 | -0.5985292878 | 1.6798385229  | -0.3999177107 |
| H | 1.0 | -4.2542620244 | 4.6922710490  | -1.3817438694 |
| H | 1.0 | -0.5794985315 | -2.3660671024 | 1.2096662141  |
| O | 8.0 | 1.2637997150  | 0.6055560179  | 0.6583309808  |
| H | 1.0 | 0.1434969429  | -3.9855563306 | 1.1941967973  |
| C | 6.0 | -2.6131498936 | 3.6976934009  | -0.4395529303 |
| C | 6.0 | 1.5103816952  | -2.4362539507 | 0.6408170646  |
| C | 6.0 | -3.6115894959 | 4.6928927051  | -0.5091410582 |
| C | 6.0 | 0.3226709117  | -2.9352606218 | 1.4519637815  |
| H | 1.0 | 1.7604602023  | -1.4137092232 | 0.9236867553  |
| H | 1.0 | 0.9511957596  | 1.4114316678  | 1.2572865671  |
| C | 6.0 | -0.7000923114 | 2.5927264578  | 0.7250005210  |
| C | 6.0 | -1.7228433260 | 3.6255017886  | 0.6822730310  |
| O | 8.0 | 2.6385632300  | -3.2831398398 | 0.8799506787  |
| N | 7.0 | -2.7825882913 | -1.5089450957 | 3.2071171626  |
| O | 8.0 | 0.1194750163  | 2.4653820232  | 1.7154239764  |
| C | 6.0 | -3.7425838631 | 5.6214206718  | 0.4975855610  |
| H | 1.0 | -4.5106578935 | 6.3888951385  | 0.4459086162  |
| H | 1.0 | 0.7784729280  | -0.7513339500 | 2.6068979721  |

|                             |            |   |     |               |               |              |
|-----------------------------|------------|---|-----|---------------|---------------|--------------|
|                             |            | C | 6.0 | -1.7580624762 | -1.2277167044 | 3.6761234401 |
|                             |            | C | 6.0 | 0.6645822989  | -2.7994127336 | 2.9442411152 |
|                             |            | C | 6.0 | -1.8885972806 | 4.6167422887  | 1.7078379104 |
|                             |            | H | 1.0 | -0.0896628193 | -3.3194542216 | 3.5448970059 |
|                             |            | C | 6.0 | -2.8771521567 | 5.5884374466  | 1.6091084474 |
|                             |            | N | 7.0 | 0.6947732020  | -1.3873207726 | 3.4004862045 |
|                             |            | C | 6.0 | 3.1455897694  | -3.1588022674 | 2.2178590277 |
|                             |            | H | 1.0 | 3.2435239797  | -0.9578043971 | 2.3946205051 |
|                             |            | H | 1.0 | 1.8604583047  | -4.5577096595 | 3.2210429518 |
|                             |            | H | 1.0 | 4.6722003165  | -1.7303620341 | 1.6915465498 |
|                             |            | O | 8.0 | -1.0336482353 | 4.5679757565  | 2.7769084822 |
|                             |            | C | 6.0 | 2.0262404471  | -3.4738881932 | 3.2549149782 |
|                             |            | H | 1.0 | 3.8870884233  | -3.9621943776 | 2.2969312418 |
|                             |            | C | 6.0 | -0.4131391236 | -0.9529767398 | 4.2498265912 |
|                             |            | C | 6.0 | 3.8896529983  | -1.8369049491 | 2.4485886582 |
|                             |            | H | 1.0 | -2.9959499826 | 6.3291045000  | 2.3899903890 |
|                             |            | H | 1.0 | -0.3160539303 | 1.1380443783  | 3.6486264187 |
|                             |            | H | 1.0 | -0.8957492962 | 6.6012692228  | 3.2273487923 |
|                             |            | H | 1.0 | -0.3659845901 | -1.5089220671 | 5.1946355442 |
|                             |            | C | 6.0 | -1.0634055273 | 5.6284807173  | 3.7093442383 |
|                             |            | C | 6.0 | -0.2515241556 | 0.5400147675  | 4.5699472635 |
|                             |            | O | 8.0 | 2.4311217098  | -3.1569195895 | 4.5766668839 |
|                             |            | H | 1.0 | 4.3596118250  | -1.8505489724 | 3.4355476168 |
|                             |            | H | 1.0 | -0.2506146557 | 5.4304659298  | 4.4113375442 |
|                             |            | H | 1.0 | 2.2182743040  | -2.2084637487 | 4.6513400071 |
|                             |            | H | 1.0 | -2.0117783273 | 5.6710060103  | 4.2637949583 |
|                             |            | O | 8.0 | -1.2630995943 | 0.8974119688  | 5.4891004178 |
|                             |            | H | 1.0 | 0.7536212845  | 0.6846564536  | 4.9981120263 |
|                             |            | H | 1.0 | -1.4883880894 | 2.8169975890  | 4.7048248188 |
|                             |            | C | 6.0 | -1.3587235102 | 2.2996465708  | 5.6642202212 |
|                             |            | H | 1.0 | -2.2263583928 | 2.4833883809  | 6.3031327735 |
|                             |            | H | 1.0 | -0.4619029867 | 2.7074052356  | 6.1594148092 |
|                             |            | H | 1.0 | -3.7177354209 | 4.2946088464  | 4.8202662384 |
|                             |            | H | 1.0 | -5.2041346875 | 4.3681922662  | 3.8331846754 |
|                             |            | C | 6.0 | -4.1096082711 | 4.2728609927  | 3.7941138426 |
|                             |            | H | 1.0 | -3.6965598893 | 5.1154931850  | 3.2365121818 |
|                             |            | H | 1.0 | -5.1873119762 | 2.6342616713  | 5.2643789110 |
|                             |            | O | 8.0 | -3.7021152346 | 3.1142848719  | 3.0970150464 |
|                             |            | C | 6.0 | -4.8297631274 | 1.7575497654  | 4.7391004344 |
|                             |            | C | 6.0 | -4.0495249414 | 1.8941011871  | 3.5959169306 |
|                             |            | H | 1.0 | -5.7745851666 | 0.3995539275  | 6.1248336099 |
|                             |            | C | 6.0 | -5.1633022179 | 0.4795717746  | 5.2292989326 |
|                             |            | O | 8.0 | -2.4261770617 | 1.9431499533  | 1.1418773367 |
| Cyanomorpholino doxorubicin | 88254-07-3 | H | 1.0 | -3.7177354209 | 4.2946088464  | 4.8202662384 |
|                             |            | H | 1.0 | -5.2041346875 | 4.3681922662  | 3.8331846754 |
|                             |            | C | 6.0 | -4.1096082711 | 4.2728609927  | 3.7941138426 |
|                             |            | H | 1.0 | -3.6965598893 | 5.1154931850  | 3.2365121818 |
|                             |            | H | 1.0 | -5.1873119762 | 2.6342616713  | 5.2643789110 |
|                             |            | O | 8.0 | -3.7021152346 | 3.1142848719  | 3.0970150464 |
|                             |            | C | 6.0 | -4.8297631274 | 1.7575497654  | 4.7391004344 |
|                             |            | C | 6.0 | -4.0495249414 | 1.8941011871  | 3.5959169306 |
|                             |            | H | 1.0 | -5.7745851666 | 0.3995539275  | 6.1248336099 |
|                             |            | C | 6.0 | -5.1633022179 | 0.4795717746  | 5.2292989326 |
|                             |            | O | 8.0 | -2.4261770617 | 1.9431499533  | 1.1418773367 |

|   |     |               |               |               |
|---|-----|---------------|---------------|---------------|
| C | 6.0 | -3.5718884596 | 0.7383169416  | 2.8907802395  |
| C | 6.0 | -2.7627820568 | 0.8226825660  | 1.6856163657  |
| H | 1.0 | -1.7084066782 | 1.5006794539  | -0.0018847587 |
| C | 6.0 | -4.7166001825 | -0.6518894959 | 4.5850041797  |
| C | 6.0 | -3.9221607427 | -0.5462895247 | 3.4227262478  |
| O | 8.0 | -1.1925906837 | 0.8370310924  | -0.6310656010 |
| H | 1.0 | -4.9505323528 | -1.6490461863 | 4.9392374413  |
| H | 1.0 | 5.8912605787  | -0.2139004289 | -0.7802579373 |
| C | 6.0 | -2.3162419824 | -0.4166747757 | 1.0778009847  |
| C | 6.0 | -1.5029441845 | -0.3612216103 | -0.0859456274 |
| C | 6.0 | -3.4735958464 | -1.7872304346 | 2.8000373766  |
| H | 1.0 | 5.4503951062  | -0.6002750498 | 0.8919490600  |
| O | 8.0 | 4.5370589732  | 1.9665748948  | -1.1180183886 |
| H | 1.0 | 4.5024691649  | 1.4474808698  | -1.9363754085 |
| H | 1.0 | -0.4003210174 | -0.5744760127 | -2.4737969777 |
| C | 6.0 | 5.1667795722  | -0.7422474578 | -0.1555367703 |
| C | 6.0 | -2.6505844976 | -1.6905625940 | 1.6186177380  |
| H | 1.0 | 1.9774663253  | -0.5062448403 | -3.1538508139 |
| H | 1.0 | 5.2073575691  | -1.8096276287 | -0.3873063155 |
| O | 8.0 | -3.7969750960 | -2.9225837181 | 3.2937445720  |
| C | 6.0 | -1.0168019669 | -1.5368388469 | -0.6732331635 |
| C | 6.0 | -0.0805304006 | -1.4088285854 | -1.8409275851 |
| C | 6.0 | -2.1694760707 | -2.8742228220 | 0.9938133226  |
| H | 1.0 | -0.9052403173 | -2.8496084770 | -3.2221394964 |
| C | 6.0 | 3.6297936539  | 1.3134913398  | -0.2210577532 |
| C | 6.0 | 2.0733608175  | -0.2350446435 | -2.0931178163 |
| C | 6.0 | 3.7626422250  | -0.2092738256 | -0.3889592616 |
| H | 1.0 | 2.2625893007  | 1.8352714900  | -2.6382786089 |
| H | 1.0 | 3.9216322934  | 1.6184347996  | 0.7892823667  |
| C | 6.0 | -1.3480523728 | -2.8002653164 | -0.1385135309 |
| H | 1.0 | 1.7171348980  | 5.7607602261  | -2.2891387957 |
| H | 1.0 | -3.0709927569 | -3.8797728076 | 2.2951966738  |
| O | 8.0 | 1.2457120865  | -1.0756557986 | -1.2974066014 |
| O | 8.0 | 3.4173233561  | -0.5295865982 | -1.7623168752 |
| C | 6.0 | 0.0270720509  | -2.6914108086 | -2.6705301090 |
| O | 8.0 | -2.4971404864 | -4.0884499081 | 1.4851027829  |
| O | 8.0 | 0.2251244538  | 5.2765319191  | -1.0059168944 |
| C | 6.0 | 1.7367395769  | 1.2491688937  | -1.8745012497 |
| N | 7.0 | 1.8856732908  | 3.1065495823  | -0.1250460294 |
| H | 1.0 | 0.8342308627  | -2.5937397080 | -3.4070222424 |
| H | 1.0 | -1.7297797817 | -4.5533582931 | -1.3150701923 |
| H | 1.0 | 3.0567590953  | -0.7135638120 | 0.2806153962  |
| C | 6.0 | 2.1530445143  | 1.7110864327  | -0.4593743316 |
| C | 6.0 | 0.6499799152  | 3.4495635954  | 0.5741371245  |

|                                          |            |   |     |               |               |               |
|------------------------------------------|------------|---|-----|---------------|---------------|---------------|
|                                          |            | C | 6.0 | 1.3308569077  | 4.8585589493  | -1.8022902009 |
|                                          |            | H | 1.0 | -1.2096193273 | 4.5486334049  | 0.2430155375  |
|                                          |            | C | 6.0 | -0.8899751782 | -4.0907374384 | -0.7800087331 |
|                                          |            | C | 6.0 | -0.3667985472 | 4.1702783047  | -0.3391340318 |
|                                          |            | H | 1.0 | 2.8191115806  | 4.9760793772  | -0.2670793995 |
|                                          |            | C | 6.0 | 2.4103303174  | 4.2048738503  | -0.9371574040 |
|                                          |            | H | 1.0 | 0.6631600557  | 1.3968885925  | -2.0049368755 |
|                                          |            | C | 6.0 | 0.2822602060  | -3.9225480778 | -1.7706430515 |
|                                          |            | H | 1.0 | 0.9854817915  | 4.1599070994  | -2.5831898559 |
|                                          |            | H | 1.0 | 0.1614124306  | 2.5434601550  | 0.9442119992  |
|                                          |            | H | 1.0 | 1.5635200335  | 1.1180093906  | 0.2467170290  |
|                                          |            | O | 8.0 | -0.5753231849 | -5.5564037100 | -3.3280368146 |
|                                          |            | H | 1.0 | -0.5926685171 | -4.8022250320 | -0.0031867678 |
|                                          |            | H | 1.0 | 1.7157394241  | -2.8642314568 | -0.9779232682 |
|                                          |            | H | 1.0 | -0.7420056763 | 3.4365830518  | -1.0670445989 |
|                                          |            | C | 6.0 | 0.3734751337  | -5.1577285835 | -2.6661792485 |
|                                          |            | O | 8.0 | 1.5323799306  | -3.8132244310 | -1.0954316324 |
|                                          |            | H | 1.0 | 3.2383699043  | 3.8326383648  | -1.5411424056 |
|                                          |            | C | 6.0 | 1.6943239782  | -5.9053552060 | -2.7566528834 |
|                                          |            | H | 1.0 | 0.6675035578  | -6.9588219739 | -3.9529718205 |
|                                          |            | H | 1.0 | 2.4768481651  | -5.1912739340 | -3.0522210630 |
|                                          |            | O | 8.0 | 1.5971459638  | -6.9783994069 | -3.6582716784 |
|                                          |            | H | 1.0 | 1.9668807420  | -6.2382763580 | -1.7435806145 |
|                                          |            | C | 6.0 | 0.9732895379  | 4.2962917855  | 1.7535563830  |
|                                          |            | N | 7.0 | 1.2446264525  | 4.9594913256  | 2.6674742779  |
|                                          |            | H | 1.0 | 5.2135421315  | 2.6011266145  | -1.0249977026 |
|                                          |            | H | 1.0 | 4.3719461263  | 3.2980358699  | 0.3525850056  |
|                                          |            | H | 1.0 | 3.5967589980  | 3.2893081348  | -1.2441538979 |
|                                          |            | C | 6.0 | 4.2281777107  | 2.7140079959  | -0.5550527460 |
|                                          |            | H | 1.0 | 4.4466239129  | 1.4916283984  | -2.5785386417 |
|                                          |            | O | 8.0 | 4.8874735107  | 0.0004650347  | -4.2937771764 |
|                                          |            | N | 7.0 | 4.0457566345  | 0.5945319465  | -2.3186426997 |
|                                          |            | C | 6.0 | 3.6172058130  | 1.3676806002  | -0.2300202344 |
|                                          |            | C | 6.0 | 4.2607732303  | -0.3588749036 | -3.2977032477 |
|                                          |            | H | 1.0 | 4.8747457307  | 0.4869205996  | 1.8446793496  |
|                                          |            | O | 8.0 | 4.3280492838  | 1.2626332212  | 2.0365395285  |
|                                          |            | H | 1.0 | 2.6522479005  | 3.2221595389  | 1.6524494495  |
|                                          |            | N | 7.0 | 3.5645503409  | 0.3834087926  | -1.0583084225 |
|                                          |            | C | 6.0 | 3.1466481776  | 1.1384407513  | 1.2093864439  |
|                                          |            | H | 1.0 | 2.2355530065  | -1.4987476339 | -1.6470971525 |
|                                          |            | C | 6.0 | 2.1962815173  | 2.2298375189  | 1.7127709349  |
|                                          |            | C | 6.0 | 3.7545688644  | -1.7624332559 | -3.1648463555 |
|                                          |            | H | 1.0 | 0.8614129067  | 2.8820417045  | 0.1245250745  |
| Daunomycin 3,4-dichlorobenzoyl hydrazone | 66996-54-1 | H | 1.0 | 5.2135421315  | 2.6011266145  | -1.0249977026 |
|                                          |            | H | 1.0 | 4.3719461263  | 3.2980358699  | 0.3525850056  |
|                                          |            | H | 1.0 | 3.5967589980  | 3.2893081348  | -1.2441538979 |
|                                          |            | C | 6.0 | 4.2281777107  | 2.7140079959  | -0.5550527460 |
|                                          |            | H | 1.0 | 4.4466239129  | 1.4916283984  | -2.5785386417 |
|                                          |            | O | 8.0 | 4.8874735107  | 0.0004650347  | -4.2937771764 |
|                                          |            | N | 7.0 | 4.0457566345  | 0.5945319465  | -2.3186426997 |
|                                          |            | C | 6.0 | 3.6172058130  | 1.3676806002  | -0.2300202344 |
|                                          |            | C | 6.0 | 4.2607732303  | -0.3588749036 | -3.2977032477 |
|                                          |            | H | 1.0 | 4.8747457307  | 0.4869205996  | 1.8446793496  |
|                                          |            | O | 8.0 | 4.3280492838  | 1.2626332212  | 2.0365395285  |
|                                          |            | H | 1.0 | 2.6522479005  | 3.2221595389  | 1.6524494495  |
|                                          |            | N | 7.0 | 3.5645503409  | 0.3834087926  | -1.0583084225 |
|                                          |            | C | 6.0 | 3.1466481776  | 1.1384407513  | 1.2093864439  |
|                                          |            | H | 1.0 | 2.2355530065  | -1.4987476339 | -1.6470971525 |
|                                          |            | C | 6.0 | 2.1962815173  | 2.2298375189  | 1.7127709349  |
|                                          |            | C | 6.0 | 3.7545688644  | -1.7624332559 | -3.1648463555 |
|                                          |            | H | 1.0 | 0.8614129067  | 2.8820417045  | 0.1245250745  |



|    |      |               |               |               |
|----|------|---------------|---------------|---------------|
| C  | 6.0  | 2.7183784620  | -2.1894695689 | -2.3235557824 |
| H  | 1.0  | 2.0590781070  | 2.0246334376  | 2.7797615303  |
| H  | 1.0  | 5.1363500439  | -2.3432875965 | -4.7024164045 |
| C  | 6.0  | 0.8200683087  | 2.2553700468  | 1.0225218014  |
| C  | 6.0  | 4.3541881178  | -2.6839335332 | -4.0356232910 |
| H  | 1.0  | 3.0619602095  | -1.0316442338 | 1.0350655685  |
| C  | 6.0  | 2.4668571368  | -0.2138467048 | 1.4513826460  |
| H  | 1.0  | 0.3203878477  | 3.8368293334  | 4.2895470349  |
| O  | 8.0  | -0.0681699820 | 3.0306006416  | 1.8783692023  |
| H  | 1.0  | -1.0203795905 | 5.7135347241  | 5.4167283091  |
| H  | 1.0  | 2.4558834024  | -0.3595254256 | 2.5406811120  |
| C  | 6.0  | 2.2894553950  | -3.5161383506 | -2.3570081207 |
| H  | 1.0  | -1.3831886247 | 5.1245286351  | 3.0431056878  |
| H  | 1.0  | 1.4736593364  | -3.8407385746 | -1.7180908708 |
| C  | 6.0  | 0.3124837824  | 0.8864052107  | 0.6272892789  |
| C  | 6.0  | 3.9442512563  | -4.0100143311 | -4.0538224212 |
| C  | 6.0  | 1.0709556433  | -0.2816559578 | 0.8728083658  |
| C  | 6.0  | -0.6786695562 | 3.4097027483  | 4.1465895426  |
| N  | 7.0  | -1.9220863459 | 5.4296738204  | 5.0373560735  |
| C  | 6.0  | 2.9027154999  | -4.4306768771 | -3.2133692905 |
| C  | 6.0  | -1.7154944976 | 4.5254875176  | 3.9002709847  |
| O  | 8.0  | -1.5545771507 | 1.9278753221  | -0.3997659689 |
| C  | 6.0  | -0.6408519697 | 2.3940638973  | 2.9942327975  |
| H  | 1.0  | -0.0747210272 | 1.4969153022  | 3.2701664990  |
| CL | 17.0 | 4.7479025267  | -5.1236055285 | -5.1487827977 |
| C  | 6.0  | -0.9049996615 | 0.7975345397  | -0.0709189615 |
| H  | 1.0  | -2.4352022358 | 3.4882887895  | 1.4871027355  |
| H  | 1.0  | -0.9464695230 | 2.8790328046  | 5.0690407986  |
| C  | 6.0  | 0.5610834454  | -1.5338349970 | 0.5179738477  |
| H  | 1.0  | -2.3978321118 | 1.5845179521  | -0.8767105308 |
| H  | 1.0  | -2.3873643416 | 4.8900388856  | 5.7666677021  |
| CL | 17.0 | 2.3502955987  | -6.0898814283 | -3.2181991775 |
| O  | 8.0  | 1.2938528107  | -2.6423433951 | 0.7881674876  |
| O  | 8.0  | -1.9548927893 | 1.9061710162  | 2.7338774696  |
| C  | 6.0  | -3.0638550866 | 3.8852971881  | 3.5236418870  |
| C  | 6.0  | -1.4380368226 | -0.4697382402 | -0.4401799477 |
| C  | 6.0  | -2.8776499653 | 2.9426708258  | 2.3264575826  |
| H  | 1.0  | -3.7836367639 | 4.6774501168  | 3.2882574952  |
| C  | 6.0  | -0.6923555623 | -1.6454350091 | -0.1423466068 |
| H  | 1.0  | 0.7135009064  | -3.4041871272 | 0.4439044018  |
| O  | 8.0  | -3.3547855840 | 0.5537662821  | -1.3697905595 |
| C  | 6.0  | -2.7215808343 | -0.5304377210 | -1.1212584270 |
| O  | 8.0  | -3.6016829856 | 3.1703304248  | 4.6454767291  |
| H  | 1.0  | -3.2055811125 | 2.2863678574  | 4.5866838331  |

|                                    |            |                                                                                                                                                                                                                                                                                                                                                                                                                                                                                                                                                                                                                                                                                                                                                                                                                                                                                                                                                                                                                                                                                                                                                                   |
|------------------------------------|------------|-------------------------------------------------------------------------------------------------------------------------------------------------------------------------------------------------------------------------------------------------------------------------------------------------------------------------------------------------------------------------------------------------------------------------------------------------------------------------------------------------------------------------------------------------------------------------------------------------------------------------------------------------------------------------------------------------------------------------------------------------------------------------------------------------------------------------------------------------------------------------------------------------------------------------------------------------------------------------------------------------------------------------------------------------------------------------------------------------------------------------------------------------------------------|
|                                    |            | C 6.0 -1.1782650088 -2.9433062934 -0.5334420736<br>H 1.0 -3.9533815947 1.6105069815 1.0151327715<br>C 6.0 -4.1558073549 2.2565752380 1.8711957131<br>H 1.0 -4.8919311325 3.0100529096 1.5698438819<br>O 8.0 -0.4851032707 -4.0079803983 -0.3125077467<br>C 6.0 -3.2372929055 -1.8470201095 -1.4883315849<br>C 6.0 -2.4656854221 -3.0206511332 -1.2034089591<br>H 1.0 -4.5927111398 1.6626620444 2.6789760540<br>O 8.0 -5.2384029320 -0.9199812801 -2.4084015920<br>C 6.0 -4.4989414506 -2.0355364108 -2.1439846483<br>C 6.0 -2.9377268262 -4.3017245043 -1.5686090873<br>H 1.0 -6.8901635099 -0.0613454758 -3.1521810161<br>H 1.0 -2.3092693642 -5.1520139453 -1.3312410828<br>H 1.0 -6.3886572062 -1.5224400333 -4.0459297014<br>C 6.0 -6.4861354872 -1.0704847406 -3.0484712907<br>C 6.0 -4.9395456481 -3.3095763935 -2.4894924296<br>C 6.0 -4.1522504020 -4.4411869234 -2.1998586982<br>H 1.0 -5.8929411784 -3.4435133757 -2.9850321372<br>H 1.0 -7.1852300382 -1.6781551605 -2.4562777288<br>H 1.0 -4.5171668595 -5.4260053905 -2.4812381521                                                                                                                  |
| Daunomycin 4-nitrobenzoylhydrazone | 66996-56-3 | H 1.0 5.3940111968 2.3052135118 -0.8156190012<br>H 1.0 3.8507808468 3.1736752007 -0.8608143372<br>H 1.0 4.7137145835 2.9617109620 0.6763872494<br>C 6.0 4.4602765907 2.4793203047 -0.2674720931<br>H 1.0 4.3064591862 1.3579980684 -2.4743072149<br>O 8.0 3.8950986372 -0.0728921213 -4.3353407777<br>H 1.0 2.6653358967 3.0260573459 1.7972690919<br>N 7.0 4.0509835106 0.4305612290 -2.1430531910<br>H 1.0 -4.8303759850 2.8885383563 0.9721740967<br>H 1.0 -2.3750084020 3.3313978035 1.1614343705<br>C 6.0 3.7546721952 -0.4483642187 -3.1766864762<br>H 1.0 1.0104651669 2.6845040246 0.1232811604<br>H 1.0 -3.8584958285 1.4789605677 0.5058847291<br>C 6.0 3.7346736121 1.1783069937 -0.0064047708<br>H 1.0 -3.8883016209 4.5135500527 2.8321812751<br>N 7.0 3.5770439894 0.2450068146 -0.8723686625<br>H 1.0 -1.4656283986 4.9215424738 2.8382381483<br>C 6.0 -4.1429346566 2.1199791785 1.3423479252<br>C 6.0 2.1989392877 2.0363265677 1.8255129806<br>C 6.0 -2.9103672320 2.7794261777 1.9404591854<br>H 1.0 1.9773305884 -1.8839852208 -4.5171737204<br>O 8.0 -0.0740719762 2.8331256340 1.7871467348<br>C 6.0 0.8889612133 2.0596889464 1.0153134574 |

|   |     |               |               |               |
|---|-----|---------------|---------------|---------------|
| O | 8.0 | 4.2959817628  | 1.0553617835  | 2.3182718012  |
| C | 6.0 | 3.2928947966  | -1.8242685634 | -2.8220163659 |
| C | 6.0 | 3.1838547306  | 0.9403025513  | 1.4035548515  |
| C | 6.0 | -3.2070347786 | 3.7073450068  | 3.1271016179  |
| H | 1.0 | 1.9677885259  | 1.8356420366  | 2.8771251588  |
| C | 6.0 | 2.3431456876  | -2.4336128008 | -3.6567553682 |
| H | 1.0 | 4.8337195083  | 0.2598654134  | 2.1937510789  |
| N | 7.0 | -2.2055058061 | 5.2182730291  | 4.7689182034  |
| C | 6.0 | -1.8956646502 | 4.3212524776  | 3.6498374149  |
| H | 1.0 | -4.6732637705 | 1.5247882763  | 2.0910702546  |
| O | 8.0 | -1.3228190229 | 1.7487555632  | -0.6448085916 |
| H | 1.0 | 4.5367795114  | -2.0965214897 | -1.0668479769 |
| H | 1.0 | -1.3438466664 | 5.4840637722  | 5.2427928453  |
| H | 1.0 | -2.7516235917 | 4.6793625144  | 5.4404448235  |
| H | 1.0 | -2.1026156417 | 1.4154390802  | -1.2227309549 |
| O | 8.0 | -2.0506816892 | 1.7232185007  | 2.4259279190  |
| C | 6.0 | 3.7962767391  | -2.5242481901 | -1.7252109532 |
| C | 6.0 | -0.7635356974 | 2.1877803855  | 2.8289726908  |
| C | 6.0 | 0.4174154053  | 0.6911041305  | 0.5711422321  |
| O | 8.0 | -3.8665195888 | 2.9838114777  | 4.1759928441  |
| C | 6.0 | 1.8575556681  | -3.7057859898 | -3.3605261072 |
| C | 6.0 | -0.7178387191 | 0.6116718945  | -0.2572040541 |
| C | 6.0 | -0.9074615841 | 3.1854832890  | 3.9882747127  |
| H | 1.0 | 0.0771415718  | 3.5944262817  | 4.2419181120  |
| H | 1.0 | 1.0850116961  | -4.1492071537 | -3.9797233726 |
| C | 6.0 | 2.4790793585  | -0.4103553246 | 1.5910696230  |
| H | 1.0 | -3.4790561615 | 2.0946427116  | 4.1423912067  |
| O | 8.0 | 3.4302128336  | -5.6643098693 | -0.0945595750 |
| C | 6.0 | 3.3185800356  | -3.8042928058 | -1.4660404935 |
| H | 1.0 | -0.2404298705 | 1.2781519066  | 3.1454204628  |
| H | 1.0 | 3.1042974709  | -1.2361650964 | 1.2396158652  |
| C | 6.0 | 1.1421719508  | -0.4780748001 | 0.8859221121  |
| O | 8.0 | -2.9939663389 | 0.3901317720  | -1.8432139728 |
| C | 6.0 | 2.3343181875  | -4.4041249615 | -2.2525125180 |
| H | 1.0 | 2.3669120221  | -0.5453789863 | 2.6760862184  |
| H | 1.0 | -1.2787329055 | 2.6459226199  | 4.8686834335  |
| N | 7.0 | 3.8622702826  | -4.5301257773 | -0.3182138962 |
| C | 6.0 | -1.2052592173 | -0.6492360031 | -0.6989432722 |
| C | 6.0 | -2.3960638276 | -0.6970920951 | -1.5335898695 |
| H | 1.0 | 1.9490235298  | -5.3763458761 | -1.9786097943 |
| H | 1.0 | -6.2543463423 | -0.1863588973 | -4.1016355733 |
| C | 6.0 | 0.6687461507  | -1.7295284956 | 0.4712623444  |
| O | 8.0 | 4.7435965476  | -3.9810588248 | 0.3533733902  |
| C | 6.0 | -0.5033049060 | -1.8302526597 | -0.3230825252 |

|                    |            |   |     |               |               |               |
|--------------------|------------|---|-----|---------------|---------------|---------------|
|                    |            | O | 8.0 | -4.7195425347 | -1.0604694750 | -3.1533222871 |
|                    |            | H | 1.0 | -5.6408155373 | -1.6388609324 | -4.9377825603 |
|                    |            | C | 6.0 | -5.8704097119 | -1.1982850833 | -3.9570108974 |
|                    |            | O | 8.0 | 1.3570194773  | -2.8401304579 | 0.8233908023  |
|                    |            | C | 6.0 | -2.8618228528 | -2.0071090820 | -1.9854921951 |
|                    |            | C | 6.0 | -4.0248189326 | -2.1819767336 | -2.8059406607 |
|                    |            | C | 6.0 | -0.9449251518 | -3.1246435314 | -0.7816421223 |
|                    |            | H | 1.0 | 0.8334895061  | -3.5989177239 | 0.3986193291  |
|                    |            | H | 1.0 | -6.6441724655 | -1.8100855912 | -3.4716216908 |
|                    |            | C | 6.0 | -2.1376567166 | -3.1864720111 | -1.6161720626 |
|                    |            | O | 8.0 | -0.3021805508 | -4.1936384702 | -0.4817363855 |
|                    |            | C | 6.0 | -4.4184739483 | -3.4500894987 | -3.2244256767 |
|                    |            | H | 1.0 | -5.2974954490 | -3.5734316402 | -3.8445989009 |
|                    |            | C | 6.0 | -2.5612127929 | -4.4605728451 | -2.0548775579 |
|                    |            | C | 6.0 | -3.6808867438 | -4.5883442642 | -2.8452584867 |
|                    |            | H | 1.0 | -1.9748008705 | -5.3163852134 | -1.7412702839 |
|                    |            | H | 1.0 | -4.0088666667 | -5.5686257997 | -3.1827127506 |
| Daunomycin 3-oxime | 34610-60-1 | H | 1.0 | -7.4831192452 | 2.2151344243  | -3.6613992939 |
|                    |            | H | 1.0 | -6.7335821264 | 3.5961605713  | -2.8150517256 |
|                    |            | C | 6.0 | -7.0481491308 | 2.5555030871  | -2.7105498001 |
|                    |            | H | 1.0 | -8.0964530340 | 0.3501000830  | -2.5613980861 |
|                    |            | O | 8.0 | -5.8856919710 | 1.8352764975  | -2.3688295173 |
|                    |            | C | 6.0 | -7.1928216700 | -0.1885955958 | -2.3048394896 |
|                    |            | C | 6.0 | -5.9833212769 | 0.4864047003  | -2.1780770630 |
|                    |            | H | 1.0 | -8.2147277095 | -2.0883177926 | -2.2048813044 |
|                    |            | C | 6.0 | -7.2581341562 | -1.5817198388 | -2.1010797261 |
|                    |            | O | 8.0 | -3.3261369834 | 1.7051176232  | -1.8566341071 |
|                    |            | H | 1.0 | -7.8213180893 | 2.4914832591  | -1.9311954837 |
|                    |            | C | 6.0 | -4.7790400887 | -0.2161832397 | -1.8394275262 |
|                    |            | H | 1.0 | 2.6682096491  | -1.0815004344 | -1.8661768170 |
|                    |            | H | 1.0 | -1.8803382421 | 1.8722965961  | -1.5995549481 |
|                    |            | C | 6.0 | -3.4863366285 | 0.4453989340  | -1.6948498084 |
|                    |            | C | 6.0 | -6.1247225727 | -2.2905523703 | -1.7754440939 |
|                    |            | H | 1.0 | 1.4631901033  | 0.9685187410  | -1.4595219992 |
|                    |            | C | 6.0 | -4.8816142008 | -1.6324555102 | -1.6409306070 |
|                    |            | O | 8.0 | -0.9217073372 | 1.5662112995  | -1.3607773425 |
|                    |            | H | 1.0 | -6.1406854092 | -3.3619706652 | -1.6127602537 |
|                    |            | C | 6.0 | -2.3387497372 | -0.3810651561 | -1.3525853537 |
|                    |            | C | 6.0 | -1.0661158314 | 0.2330241986  | -1.2030054607 |
|                    |            | H | 1.0 | 1.4066044861  | -3.4039385309 | -1.2369799147 |
|                    |            | C | 6.0 | -3.7241325266 | -2.4484993753 | -1.2971356141 |
|                    |            | C | 6.0 | -2.4480515043 | -1.7883649022 | -1.1586131210 |
|                    |            | O | 8.0 | -3.8421627367 | -3.7130898538 | -1.1246464811 |

|   |     |               |               |               |
|---|-----|---------------|---------------|---------------|
| C | 6.0 | 0.0609082785  | -0.5408185058 | -0.8897788135 |
| C | 6.0 | 1.3720343992  | 0.1690991523  | -0.7181919050 |
| C | 6.0 | -1.2946133854 | -2.5523625672 | -0.8256702874 |
| C | 6.0 | 2.5800854016  | -0.7669896508 | -0.8208496796 |
| C | 6.0 | -0.0476385372 | -1.9320540832 | -0.6851755692 |
| H | 1.0 | -2.3685625448 | -4.0894534495 | -0.7922633316 |
| O | 8.0 | -1.3840703005 | -3.8884855058 | -0.6463815458 |
| H | 1.0 | 3.4901189746  | -0.2189184426 | -0.5585636261 |
| C | 6.0 | 1.1543880196  | -2.7926482148 | -0.3580025029 |
| H | 1.0 | 3.7478882205  | -3.2877383063 | -2.1258864006 |
| H | 1.0 | 1.1996893220  | 2.6670343112  | -0.2467002511 |
| C | 6.0 | 3.6240356711  | -2.9571559240 | 0.0123577408  |
| H | 1.0 | 5.5146644513  | 1.6624714492  | 0.3407918733  |
| C | 6.0 | 2.4167277451  | -2.0089824966 | 0.0760934634  |
| H | 1.0 | 5.1509447419  | -3.8371443627 | -1.1822890796 |
| H | 1.0 | 0.9035547138  | -3.5129388930 | 0.4268391347  |
| C | 6.0 | 4.4026521056  | -3.0487494777 | -1.2782953055 |
| O | 8.0 | 1.3563013078  | 0.8154656640  | 0.6049193606  |
| O | 8.0 | 3.0455143506  | 2.4555862034  | 0.5309060061  |
| C | 6.0 | 1.6393745372  | 2.1907744727  | 0.6347162544  |
| N | 7.0 | 4.0141559483  | -3.7811197253 | 0.9215159148  |
| H | 1.0 | 5.5239662464  | 3.2018611798  | 1.2305388004  |
| C | 6.0 | 5.2823512907  | 2.1379021370  | 1.2974217805  |
| H | 1.0 | 4.9105718387  | -2.1078875919 | -1.5202608716 |
| H | 1.0 | 1.7436813870  | -0.7763700762 | 1.4778296003  |
| C | 6.0 | 3.8141186590  | 1.9393107232  | 1.6413811880  |
| H | 1.0 | 3.6024849905  | 0.8691216024  | 1.7597639088  |
| O | 8.0 | 2.3095413818  | -1.5689239945 | 1.4491838804  |
| H | 1.0 | 5.9139148649  | 1.6902294801  | 2.0712597360  |
| C | 6.0 | 1.0616490049  | 2.7784379262  | 1.9251612114  |
| H | 1.0 | 1.0560382289  | 3.8710610665  | 1.8252663153  |
| H | 1.0 | 3.3825099342  | 4.2854151306  | 1.8387240607  |
| H | 1.0 | 0.0209323328  | 2.4547842625  | 2.0206637382  |
| O | 8.0 | 3.3486632276  | -3.8262510296 | 2.1370231705  |
| H | 1.0 | 2.7583643823  | -3.0419203039 | 2.1873093580  |
| C | 6.0 | 3.3699460600  | 2.6835462009  | 2.9089494559  |
| O | 8.0 | 3.6026010916  | 4.0904220443  | 2.7633002510  |
| C | 6.0 | 1.8807899734  | 2.4046811452  | 3.1784904002  |
| H | 1.0 | 1.7775753290  | 1.3270642224  | 3.3604674696  |
| H | 1.0 | 3.9584496880  | 2.3620213463  | 3.7750291054  |
| H | 1.0 | 1.7072415492  | 4.0901579315  | 4.2793958445  |
| N | 7.0 | 1.4824462600  | 3.1038169954  | 4.4024386725  |
| H | 1.0 | 0.4726559195  | 3.0447864484  | 4.5183343980  |

|                           |                            |               |               |               |               |               |
|---------------------------|----------------------------|---------------|---------------|---------------|---------------|---------------|
| Daunorubicin / Daunomycin | 20830-81-3 /<br>23541-50-6 | H             | 1.0           | -4.5631121078 | 5.2690230186  | 1.9915039681  |
|                           |                            | O             | 8.0           | -2.3767776036 | 5.3769536212  | 0.7473120973  |
|                           |                            | H             | 1.0           | -4.7538336434 | 3.5307919279  | 1.5599654734  |
|                           |                            | C             | 6.0           | -4.0947563930 | 4.2832359106  | 2.0030620384  |
|                           |                            | H             | 1.0           | -1.5012884918 | 3.4604626064  | -0.9535336075 |
|                           |                            | C             | 6.0           | -2.7844134604 | 4.3407330499  | 1.2452966383  |
|                           |                            | H             | 1.0           | -3.9156209825 | 3.9520083162  | 3.0307511246  |
|                           |                            | H             | 1.0           | -2.9912229662 | 2.5131826202  | -0.7728579356 |
|                           |                            | C             | 6.0           | -1.9718719637 | 2.6440527820  | -0.3959320118 |
|                           |                            | C             | 6.0           | -1.9881509118 | 3.0305026590  | 1.0992554525  |
|                           |                            | O             | 8.0           | 2.9398109940  | -1.5590704158 | -1.1210566368 |
|                           |                            | H             | 1.0           | -1.0566242352 | 1.1855296649  | -1.7036297148 |
|                           |                            | H             | 1.0           | 1.5716507669  | -1.0823482574 | -1.4525581931 |
|                           |                            | O             | 8.0           | -2.6516343675 | 2.0344883135  | 1.8779081508  |
|                           |                            | C             | 6.0           | 3.2661744348  | -0.7842556742 | -0.1556402378 |
|                           |                            | C             | 6.0           | -1.1936337260 | 1.3483292352  | -0.6300149468 |
|                           |                            | O             | 8.0           | 0.7285232252  | -0.4975981046 | -1.3503149124 |
|                           |                            | C             | 6.0           | 1.0630842724  | 0.3386305811  | -0.3437438720 |
|                           |                            | C             | 6.0           | 2.3288580717  | 0.2348475696  | 0.2927039511  |
|                           |                            | C             | 6.0           | 0.1387481874  | 1.3125026416  | 0.0650632520  |
|                           |                            | H             | 1.0           | 7.1782101818  | -3.1931554282 | -1.5386699920 |
|                           |                            | O             | 8.0           | 4.1979629425  | 1.8472929602  | 3.0011108404  |
|                           |                            | C             | 6.0           | 2.6337171973  | 1.1298153252  | 1.3595165560  |
|                           |                            | H             | 1.0           | -2.5312218330 | 1.1818447410  | 1.4269204658  |
|                           |                            | C             | 6.0           | 0.4352908468  | 2.1919806915  | 1.1256388302  |
|                           |                            | C             | 6.0           | 3.9048381201  | 1.0511249492  | 2.0390910664  |
|                           |                            | C             | 6.0           | 1.6794988670  | 2.1040024549  | 1.7637622110  |
|                           |                            | C             | 6.0           | 4.5518270055  | -0.8707111559 | 0.5298255281  |
|                           |                            | H             | 1.0           | -0.2084834421 | 4.2403261936  | 1.2345144178  |
|                           |                            | C             | 6.0           | -0.5395417130 | 3.2540122349  | 1.5842400642  |
|                           |                            | H             | 1.0           | 2.8938403545  | 2.6923213999  | 3.0658792383  |
|                           |                            | C             | 6.0           | 4.8518396301  | 0.0347513398  | 1.6011082708  |
|                           |                            | O             | 8.0           | 1.9603821682  | 2.9609096980  | 2.7713590469  |
|                           |                            | O             | 8.0           | 5.2744512282  | -2.6993854794 | -0.8320232620 |
|                           |                            | C             | 6.0           | 5.5591269190  | -1.8333315882 | 0.1866121543  |
|                           |                            | H             | 1.0           | 5.8043599897  | -4.2284008155 | -2.0148708747 |
|                           |                            | C             | 6.0           | 6.2425337764  | -3.6569294722 | -1.1935465403 |
|                           |                            | C             | 6.0           | 6.0926284095  | -0.0318923429 | 2.2749987023  |
|                           |                            | H             | 1.0           | 6.2612651645  | 0.6798442984  | 3.0749046599  |
|                           |                            | C             | 6.0           | 6.7707832028  | -1.8753309734 | 0.8678237530  |
| O                         | 8.0                        | -1.9940971799 | 0.2216953311  | -0.1245394491 |               |               |
| C                         | 6.0                        | 7.0337659869  | -0.9680636878 | 1.9150506190  |               |               |
| H                         | 1.0                        | 7.5247715872  | -2.6052596965 | 0.6005681506  |               |               |
| H                         | 1.0                        | -0.5376019599 | 3.3011233405  | 2.6781591624  |               |               |

|                                        |            |                                                                                                                                                                                                                                                                                                                                                                                                                                                                                                                                                                                                                                                                                                                                                                                                                                                                                                                                                                                                                                                                                                                                                                                                              |
|----------------------------------------|------------|--------------------------------------------------------------------------------------------------------------------------------------------------------------------------------------------------------------------------------------------------------------------------------------------------------------------------------------------------------------------------------------------------------------------------------------------------------------------------------------------------------------------------------------------------------------------------------------------------------------------------------------------------------------------------------------------------------------------------------------------------------------------------------------------------------------------------------------------------------------------------------------------------------------------------------------------------------------------------------------------------------------------------------------------------------------------------------------------------------------------------------------------------------------------------------------------------------------|
|                                        |            | H 1.0 7.9885873064 -1.0195044439 2.4332215503<br>O 8.0 -3.7428556725 -0.0075530757 -1.5775513663<br>H 1.0 6.4796265226 -4.3420167866 -0.3663825403<br>H 1.0 -5.4093472919 -0.2085619228 -2.6614000402<br>C 6.0 -2.5405275860 -0.6299268866 -1.0763223856<br>H 1.0 -3.6057334695 0.2064328064 -4.2599181498<br>H 1.0 -1.8282052219 -0.7798614282 -1.8949852513<br>C 6.0 -4.4690788643 -0.7689837928 -2.5436520762<br>H 1.0 -3.4777182844 -1.7391888692 0.4895504596<br>C 6.0 -3.7869970289 -0.8160968630 -3.9146597730<br>C 6.0 -2.8725953328 -1.9542658216 -0.3986724257<br>H 1.0 -5.5117309561 -1.9229417550 -1.0775745668<br>H 1.0 -1.9407161965 -2.4199918278 -0.0610217726<br>H 1.0 -2.8468622254 -1.3664865448 -3.8781361655<br>C 6.0 -4.8400335795 -2.1392475297 -1.9239126553<br>H 1.0 -4.4358799255 -1.3165162205 -4.6411312158<br>C 6.0 -3.6397528705 -2.8958680209 -1.3381347529<br>H 1.0 -6.2319819653 -2.5317600309 -3.2403170456<br>O 8.0 -5.4893117960 -3.0125075057 -2.8524554765<br>H 1.0 -4.0558188927 -3.7265552490 -0.7390187852<br>N 7.0 -2.7628729176 -3.3657430724 -2.4147702976<br>H 1.0 -2.0009307065 -3.9155707397 -2.0267034823<br>H 1.0 -3.2955266091 -3.9661255943 -3.0383310251 |
| 4-Demethoxyadriamycin /<br>Medorubicin | 64363-63-9 | H 1.0 2.2726585267 4.1968709828 -7.2481741887<br>H 1.0 0.8563059445 2.1905212846 -6.7950245156<br>C 6.0 2.2570165008 3.7445189705 -6.2593026130<br>C 6.0 1.4700728056 2.6342607332 -6.0178588889<br>O 8.0 -0.1117094587 0.3675260166 -5.4610619430<br>H 1.0 3.6620686514 5.1675648039 -5.4149751488<br>C 6.0 3.0435450344 4.2942540655 -5.2214966152<br>H 1.0 -0.7771485109 -0.8262898927 -4.7077913005<br>C 6.0 1.4358072419 2.0318809080 -4.7405448019<br>C 6.0 0.5973457582 0.8615471979 -4.5161869214<br>O 8.0 -0.9514347767 -1.4153006005 -3.9002641195<br>C 6.0 3.0261595231 3.7219429596 -3.9636739178<br>C 6.0 2.2293303565 2.5871327596 -3.6936900033<br>C 6.0 0.5984237551 0.2842267104 -3.1885527420<br>H 1.0 3.6194816577 4.1212071112 -3.1474502938<br>C 6.0 -0.2023561018 -0.8607801748 -2.9216118190<br>C 6.0 2.2286086198 2.0032493472 -2.3611828057<br>H 1.0 -2.0270522795 -2.5632927738 -1.9354896478<br>C 6.0 1.3943108102 0.8432406157 -2.1412941496<br>H 1.0 -0.5698316532 -3.5379526996 -1.9235730870                                                                                                                                                                                  |

|   |     |               |               |               |
|---|-----|---------------|---------------|---------------|
| C | 6.0 | -0.2239573409 | -1.4377712485 | -1.6455513611 |
| C | 6.0 | -1.0585774059 | -2.6822645617 | -1.4392480662 |
| O | 8.0 | 2.9422134496  | 2.5010401079  | -1.4183093104 |
| C | 6.0 | 1.3610322972  | 0.2461803237  | -0.8533926121 |
| O | 8.0 | -1.1092264431 | -5.4192913172 | -0.3145724014 |
| C | 6.0 | 0.5629132140  | -0.8798004753 | -0.6131172645 |
| C | 6.0 | -1.3028316880 | -3.0388951717 | 0.0427645458  |
| C | 6.0 | -1.7609571876 | -4.4923450616 | 0.1478428034  |
| O | 8.0 | -2.3367217758 | -2.2436251250 | 0.6165141314  |
| O | 8.0 | 2.1034667943  | 0.7609963058  | 0.1530136860  |
| H | 1.0 | 2.5932240458  | 1.5488949283  | -0.2820275038 |
| H | 1.0 | -1.9125482691 | -1.4636693636 | 1.0183508226  |
| H | 1.0 | 0.7658753242  | -3.5563669628 | 0.3967927571  |
| C | 6.0 | 0.5308920219  | -1.4429676964 | 0.7797017103  |
| C | 6.0 | 0.0176377488  | -2.8861723532 | 0.8317749724  |
| H | 1.0 | -3.8722957282 | -4.2561295580 | 0.3665672005  |
| H | 1.0 | 1.5323561414  | -1.3837603227 | 1.2178321375  |
| C | 6.0 | -3.0620065871 | -4.8039488083 | 0.8708902452  |
| O | 8.0 | -0.3569111327 | -0.5806050714 | 1.5711906183  |
| H | 1.0 | -2.5450882073 | -6.5661024544 | 0.4013802767  |
| H | 1.0 | -3.0049110013 | -4.3778674277 | 1.8832924526  |
| H | 1.0 | -0.1331099448 | -3.1961429448 | 1.8730452360  |
| H | 1.0 | -1.7082726136 | 1.3198346312  | 2.0576727011  |
| O | 8.0 | -3.2959591007 | -6.1892661384 | 0.8972725758  |
| H | 1.0 | 0.7394420330  | 2.0338814698  | 2.0015572509  |
| H | 1.0 | -3.7791003982 | 0.7644054180  | 3.3525413859  |
| C | 6.0 | -0.1225519599 | -0.5159589719 | 2.9729720077  |
| C | 6.0 | -1.6941369488 | 1.2789393023  | 3.1526746950  |
| H | 1.0 | 0.0273668961  | -1.5263253101 | 3.3790237013  |
| H | 1.0 | 1.9504871876  | 0.1158004591  | 2.7643439919  |
| O | 8.0 | -1.3238038287 | -0.0599849985 | 3.5671936912  |
| H | 1.0 | -3.4519490235 | 2.5108866325  | 3.3561403836  |
| C | 6.0 | 0.7630058497  | 1.8801404320  | 3.0851125991  |
| C | 6.0 | -3.0886789173 | 1.5372172682  | 3.7002562607  |
| H | 1.0 | -0.8794143186 | 3.2735030051  | 3.4047686477  |
| C | 6.0 | 1.0598711311  | 0.3916636385  | 3.3323943511  |
| C | 6.0 | -0.6203610873 | 2.2417820956  | 3.6747713043  |
| H | 1.0 | 1.8261588110  | 3.6197006286  | 3.2339907854  |
| N | 7.0 | 1.8539947257  | 2.6872019065  | 3.6412073332  |
| H | 1.0 | -3.0809819044 | 1.5420876610  | 4.7932109620  |
| H | 1.0 | 1.2892991104  | 0.2361935669  | 4.3954346507  |
| H | 1.0 | 1.6664977620  | 2.8056642615  | 4.6367949868  |
| O | 8.0 | -0.5805345487 | 2.2099514176  | 5.1088604249  |
| H | 1.0 | -0.6516334456 | 1.2711917740  | 5.3412502867  |



|                           |            |                                                                                                                                                                                                                                                                                                                                                                                                                                                                                                                                                                                                                                                                                                                                                                                                                                                                                                                                                                                                                                                                                                                                                                                                                                                                                                                                                                                                                                                                                                                                                                                                                                                                                                                                                                                                                                                                                                                                                                                                                                                                                                  |
|---------------------------|------------|--------------------------------------------------------------------------------------------------------------------------------------------------------------------------------------------------------------------------------------------------------------------------------------------------------------------------------------------------------------------------------------------------------------------------------------------------------------------------------------------------------------------------------------------------------------------------------------------------------------------------------------------------------------------------------------------------------------------------------------------------------------------------------------------------------------------------------------------------------------------------------------------------------------------------------------------------------------------------------------------------------------------------------------------------------------------------------------------------------------------------------------------------------------------------------------------------------------------------------------------------------------------------------------------------------------------------------------------------------------------------------------------------------------------------------------------------------------------------------------------------------------------------------------------------------------------------------------------------------------------------------------------------------------------------------------------------------------------------------------------------------------------------------------------------------------------------------------------------------------------------------------------------------------------------------------------------------------------------------------------------------------------------------------------------------------------------------------------------|
|                           |            |                                                                                                                                                                                                                                                                                                                                                                                                                                                                                                                                                                                                                                                                                                                                                                                                                                                                                                                                                                                                                                                                                                                                                                                                                                                                                                                                                                                                                                                                                                                                                                                                                                                                                                                                                                                                                                                                                                                                                                                                                                                                                                  |
| N,N-dibenzyl-daunorubicin | 70878-51-2 | H 1.0 5.7427127730 -0.6633936726 -7.4940678168<br>H 1.0 5.3883866417 2.4845687444 -1.4817360000<br>C 6.0 4.8592979537 -0.7483036441 -6.8669390570<br>H 1.0 4.5303598074 1.3813616278 -6.7608147026<br>H 1.0 4.9277110770 -2.9009876098 -6.7787554565<br>C 6.0 4.1780209513 0.4006711533 -6.4519354022<br>C 6.0 4.7129125193 1.7633426381 -1.0275932245<br>C 6.0 4.4011046474 -2.0026928561 -6.4674229567<br>H 1.0 5.2980634240 2.2505680328 0.9923104556<br>H 1.0 3.9171714897 1.0944565834 -2.9190548004<br>C 6.0 4.6653889686 1.6293173225 0.3633389230<br>C 6.0 3.8912919648 0.9811270395 -1.8393932069<br>C 6.0 3.0482729764 0.2947890005 -5.6433975372<br>C 6.0 3.2667746870 -2.1071532033 -5.6568919853<br>H 1.0 2.5108665758 1.1776565138 -5.3084685241<br>C 6.0 3.7912459606 0.7071061547 0.9395001085<br>H 1.0 2.8464980079 -1.5413254611 -2.6626692906<br>H 1.0 2.9135276922 -3.0871746692 -5.3438895278<br>C 6.0 3.0141550780 0.0474366247 -1.2718647774<br>C 6.0 2.5794535887 -0.9643634524 -5.2385732166<br>H 1.0 3.6968273741 0.6015699652 2.0159361677<br>C 6.0 2.9792481155 -0.0806736287 0.1211311425<br>C 6.0 2.1623540989 -0.8548427172 -2.1508799215<br>N 7.0 1.3744612887 -0.1899758143 -3.2115173507<br>H 1.0 0.8494633260 1.9439689616 -1.6530448745<br>H 1.0 5.1576890249 -0.2349204955 4.5718982943<br>C 6.0 1.3193673615 -1.0549609968 -4.3974758270<br>H 1.0 2.2868064374 -0.7732770642 0.5913505776<br>H 1.0 0.5183308174 0.5479750833 -0.6430732057<br>H 1.0 1.5200430769 -1.4861784383 -1.5130193895<br>H 1.0 0.0599981010 2.8898609449 -3.5276553435<br>C 6.0 0.1450936386 1.1214140554 -1.4871490474<br>H 1.0 0.4829867448 -0.7393160302 -5.0248880555<br>H 1.0 1.1181896428 -2.1109363663 -4.1380509541<br>O 8.0 0.0846902410 2.2612437228 -4.2643699339<br>C 6.0 4.6048925412 -0.9807653756 5.1468924335<br>C 6.0 0.0437397729 0.2805469392 -2.7680075114<br>H 1.0 4.6770776550 -0.7358387696 6.2162645184<br>H 1.0 5.0597697173 -1.9680691571 4.9831010101<br>C 6.0 -0.6833223203 1.1387145866 -3.8397074793<br>O 8.0 3.2760925110 -0.9225584821 4.6767239646 |

|   |     |               |               |               |
|---|-----|---------------|---------------|---------------|
| H | 1.0 | -1.0515138311 | 2.4399647128  | -0.2669863776 |
| H | 1.0 | 0.5278090244  | 0.7976929844  | 2.2011547071  |
| H | 1.0 | -0.6173605950 | -0.5809456132 | -2.5505030299 |
| H | 1.0 | -0.8726906443 | 0.5556975569  | -4.7471093310 |
| C | 6.0 | -1.2013100576 | 1.6953099039  | -1.0526379190 |
| O | 8.0 | 1.4102412107  | 0.0805967055  | 3.1413042006  |
| O | 8.0 | -1.8336994941 | 2.4127488807  | -2.1242958182 |
| H | 1.0 | -2.2696221910 | 3.2805530110  | -4.6139424606 |
| O | 8.0 | -0.3467042194 | 0.9857603623  | 1.6858579958  |
| C | 6.0 | -2.0482014484 | 1.5925905356  | -3.2827731125 |
| H | 1.0 | 3.7020028406  | -2.7184013817 | 6.6028254808  |
| C | 6.0 | 2.3507651745  | -1.7662962676 | 5.2259078114  |
| O | 8.0 | -2.0064832621 | 0.6464872508  | -0.5875801905 |
| C | 6.0 | -2.8521891271 | 2.4206378301  | -4.2744029170 |
| C | 6.0 | 0.5996489570  | -0.7567987139 | 3.6811573239  |
| C | 6.0 | 2.6868596522  | -2.6678351223 | 6.2297212959  |
| H | 1.0 | -2.6223243048 | 0.7032432386  | -2.9902658105 |
| H | 1.0 | -2.7184506419 | 1.9691572520  | 0.8225201461  |
| H | 1.0 | -3.1179482968 | 1.8185316765  | -5.1497801123 |
| C | 6.0 | -1.2087628150 | 0.0842099335  | 2.2021173452  |
| C | 6.0 | 1.0080004545  | -1.6896350455 | 4.7236069062  |
| C | 6.0 | -2.8826253544 | 0.9210591188  | 0.5345664846  |
| H | 1.0 | -3.7722200767 | 2.7777175364  | -3.8040457113 |
| H | 1.0 | -4.5172348676 | 3.3038579499  | 1.3332223935  |
| C | 6.0 | -0.7853137208 | -0.7937967100 | 3.2384866469  |
| H | 1.0 | -5.9359307948 | 3.7008204078  | 2.3388468203  |
| C | 6.0 | -2.5206859152 | 0.0255834713  | 1.7023046581  |
| H | 1.0 | -4.6256481351 | 1.5853967624  | -0.5700749407 |
| C | 6.0 | 1.7126259070  | -3.5290776167 | 6.7743552262  |
| C | 6.0 | -5.5429193013 | 3.0155836682  | 1.5863137554  |
| C | 6.0 | -4.3204541617 | 0.7254927955  | 0.0335575561  |
| H | 1.0 | 1.9999404990  | -4.2250677678 | 7.5588464118  |
| C | 6.0 | 0.0445002939  | -2.5846818862 | 5.2961486010  |
| H | 1.0 | -6.1364765535 | 3.0820295240  | 0.6691284612  |
| H | 1.0 | -4.3238047615 | -0.1443965186 | -0.6314356877 |
| C | 6.0 | -1.7318460207 | -1.6961852502 | 3.8025837000  |
| C | 6.0 | 0.4162576864  | -3.4890004771 | 6.3157686592  |
| C | 6.0 | -5.5896978820 | 1.5994091394  | 2.1307294488  |
| C | 6.0 | -3.4650284945 | -0.8402518359 | 2.2961867317  |
| C | 6.0 | -1.3439842018 | -2.6039950159 | 4.8550993087  |
| C | 6.0 | -5.3251456951 | 0.4298199680  | 1.1426137457  |
| C | 6.0 | -3.0731004089 | -1.6959959616 | 3.3331452709  |
| O | 8.0 | -5.9596146411 | 1.3751539984  | 3.2688490024  |
| H | 1.0 | -0.3567032864 | -4.1384910822 | 6.7099877343  |

|                       |            |   |     |               |               |               |
|-----------------------|------------|---|-----|---------------|---------------|---------------|
|                       |            | C | 6.0 | -4.9132154821 | -0.8545375893 | 1.8606421947  |
|                       |            | O | 8.0 | -6.6078161376 | 0.2724722904  | 0.4893847422  |
|                       |            | O | 8.0 | -2.1887552909 | -3.4079655839 | 5.3864264400  |
|                       |            | H | 1.0 | -5.1081205800 | -1.6855053832 | 1.1679028106  |
|                       |            | H | 1.0 | -5.5451349784 | -1.0154560750 | 2.7390192156  |
|                       |            | H | 1.0 | -7.2062484216 | -0.0858823371 | 1.1614712334  |
|                       |            | H | 1.0 | -3.4671042740 | -3.0365269775 | 4.5838556430  |
|                       |            | O | 8.0 | -3.9877582453 | -2.5312569724 | 3.8732842778  |
| N,N-diethyladriamycin | 70844-09-6 | H | 1.0 | -2.0288479399 | -6.8570070548 | -3.8382645968 |
|                       |            | H | 1.0 | -2.3036796897 | -4.6569990410 | -4.4386483957 |
|                       |            | H | 1.0 | 3.3025841996  | 2.0925977745  | -4.1253072949 |
|                       |            | H | 1.0 | -1.7462472862 | -7.8523096546 | -2.4073310528 |
|                       |            | H | 1.0 | -4.6930883025 | -3.9311082879 | -4.5915826417 |
|                       |            | H | 1.0 | -0.5287532597 | -6.6790087760 | -2.9242552655 |
|                       |            | C | 6.0 | -1.6061678858 | -6.8500276772 | -2.8280861974 |
|                       |            | O | 8.0 | 2.7082766104  | 2.7936865499  | -3.8204275021 |
|                       |            | H | 1.0 | -4.5685678588 | -5.3488908609 | -3.5504045837 |
|                       |            | C | 6.0 | -4.2860590892 | -4.2954972658 | -3.6421937625 |
|                       |            | C | 6.0 | -2.7697458405 | -4.0877180860 | -3.6099666277 |
|                       |            | H | 1.0 | -0.2346334292 | -3.8966153903 | -3.0795906554 |
|                       |            | H | 1.0 | 0.9761261067  | 0.9603964116  | -3.1464979099 |
|                       |            | H | 1.0 | -2.5732417510 | -3.0354475012 | -3.8300034970 |
|                       |            | H | 1.0 | 2.5762424544  | 0.3229904788  | -2.7163075604 |
|                       |            | H | 1.0 | 0.4076695282  | 3.3203748889  | -2.7979802721 |
|                       |            | H | 1.0 | 0.9712206947  | -1.5835135097 | -2.5492134511 |
|                       |            | H | 1.0 | -1.4881021540 | -1.7419166687 | -2.7326937447 |
|                       |            | C | 6.0 | -2.2830980071 | -5.8009547433 | -1.9229836410 |
|                       |            | H | 1.0 | -3.3526078347 | -6.0332048272 | -1.8690787438 |
|                       |            | C | 6.0 | 2.3182364664  | 2.4494809049  | -2.4730730233 |
|                       |            | C | 6.0 | 1.7866066588  | 1.0188985071  | -2.4120836423 |
|                       |            | N | 7.0 | -2.1627302765 | -4.3933500954 | -2.3130561603 |
|                       |            | H | 1.0 | -4.7613381690 | -3.7438270648 | -2.8256826745 |
|                       |            | C | 6.0 | -0.8367138763 | -3.7626115289 | -2.1569396769 |
|                       |            | C | 6.0 | 1.2133845697  | 3.4140757010  | -2.0564844915 |
|                       |            | H | 1.0 | 1.8403472459  | -3.6069928724 | -1.9563716670 |
|                       |            | H | 1.0 | 1.5490516280  | 4.4524330153  | -2.1060223820 |
|                       |            | C | 6.0 | -0.9979014242 | -2.2487562261 | -1.8974195400 |
|                       |            | H | 1.0 | -1.9154873982 | -5.8932473090 | -0.8993351730 |
|                       |            | C | 6.0 | 3.6178106562  | 2.6136636938  | -1.6599382916 |
|                       |            | O | 8.0 | 4.3560690182  | 1.6616475717  | -1.4422066436 |
|                       |            | C | 6.0 | 0.3374385056  | -1.5533921763 | -1.6386843022 |
|                       |            | H | 1.0 | 3.3676786587  | 4.3954428221  | -0.5023998661 |
|                       |            | H | 1.0 | 4.0134529375  | 4.6597873504  | -2.1257127582 |

|   |     |               |               |               |
|---|-----|---------------|---------------|---------------|
| H | 1.0 | 0.2474468208  | -5.4099425553 | -1.2202983639 |
| C | 6.0 | 4.0786073842  | 4.0029222745  | -1.2462824987 |
| O | 8.0 | 0.0639933416  | -0.2582036118 | -1.2447746233 |
| C | 6.0 | 0.0320487329  | -4.3553595580 | -1.0196673767 |
| C | 6.0 | 1.2200744320  | 0.6089822806  | -1.0326667042 |
| C | 6.0 | 1.3652472220  | -3.5801159051 | -0.9592306164 |
| H | 1.0 | -1.6320165934 | -2.1029586806 | -1.0178383971 |
| O | 8.0 | 1.0670578827  | -2.2320895851 | -0.6043187455 |
| C | 6.0 | 0.7368844204  | 3.0940560463  | -0.6589425788 |
| H | 1.0 | 1.9595655101  | 0.0286827730  | -0.4745987883 |
| O | 8.0 | 0.3107344526  | 5.4050238931  | -0.3157871585 |
| H | 1.0 | 2.6572244724  | -5.1370131058 | -0.1928073410 |
| C | 6.0 | 0.7666071554  | 1.7663721360  | -0.1730251685 |
| C | 6.0 | 2.3345275520  | -4.1263290539 | 0.0789575312  |
| H | 1.0 | 3.2133858867  | -3.4802553225 | 0.1443530424  |
| O | 8.0 | -0.6066388211 | -4.3110698629 | 0.2489269036  |
| O | 8.0 | 5.3927836713  | 3.9657444313  | -0.7471360616 |
| C | 6.0 | 0.3163589972  | 4.1401563760  | 0.1676980602  |
| H | 1.0 | -0.0258285417 | 5.9611402775  | 0.4694232977  |
| H | 1.0 | 5.5966460937  | 3.0154728248  | -0.6784217139 |
| H | 1.0 | -0.5166393789 | -3.3966783952 | 0.5639926452  |
| H | 1.0 | 1.8549107564  | -4.1676024127 | 1.0591180824  |
| C | 6.0 | 0.3970236047  | 1.4957270329  | 1.1571240420  |
| C | 6.0 | -0.0898067303 | 3.8793895940  | 1.5051251008  |
| O | 8.0 | 0.4783977923  | 0.2360874555  | 1.6153978069  |
| C | 6.0 | -0.0454200907 | 2.5488606640  | 2.0110119158  |
| O | 8.0 | -0.5480817612 | 6.1789551681  | 1.8989709114  |
| C | 6.0 | -0.5220509954 | 4.9734278306  | 2.3399831662  |
| H | 1.0 | 0.1633821414  | 0.3164100209  | 2.5865909852  |
| C | 6.0 | -0.4322649424 | 2.2366174643  | 3.3805784522  |
| C | 6.0 | -0.9302010225 | 4.6722204788  | 3.7040639582  |
| O | 8.0 | -0.3572978002 | 1.0330808254  | 3.8000994295  |
| H | 1.0 | -1.3670368554 | 6.7365291799  | 4.0581310330  |
| C | 6.0 | -0.8946209595 | 3.3377725060  | 4.2247602240  |
| C | 6.0 | -1.3652936642 | 5.7503920889  | 4.5077989400  |
| C | 6.0 | -1.3222770481 | 3.1544960175  | 5.5817837197  |
| C | 6.0 | -1.7663044211 | 5.5345591688  | 5.8057386090  |
| O | 8.0 | -1.2949452249 | 1.8832331353  | 6.0803139937  |
| C | 6.0 | -1.7477270496 | 4.2343328360  | 6.3492842604  |
| H | 1.0 | -2.1019714443 | 6.3630003051  | 6.4252266545  |
| C | 6.0 | -1.7103449778 | 1.6695609663  | 7.4099297971  |
| H | 1.0 | -2.7599085156 | 1.9568364183  | 7.5690896229  |
| H | 1.0 | -1.6041913554 | 0.5968793159  | 7.5859142010  |
| H | 1.0 | -2.0690531526 | 4.0860370100  | 7.3726839834  |

|                        |            |               |               |               |               |               |
|------------------------|------------|---------------|---------------|---------------|---------------|---------------|
|                        |            | H             | 1.0           | -1.0864932272 | 2.2148846458  | 8.1329639551  |
| N,N-dimethyladriamycin | 67106-76-7 | H             | 1.0           | 3.3224218970  | 0.5002502122  | -5.9981446382 |
|                        |            | H             | 1.0           | 5.5462643699  | 1.6471696560  | -5.8699761985 |
|                        |            | C             | 6.0           | 3.8022559212  | 0.7097215811  | -5.0491766761 |
|                        |            | O             | 8.0           | 1.3458776376  | -0.5543612672 | -5.2081974520 |
|                        |            | C             | 6.0           | 5.0229810906  | 1.3391389870  | -4.9678978895 |
|                        |            | H             | 1.0           | 0.0114643070  | -1.2592200622 | -4.8326775952 |
|                        |            | O             | 8.0           | -0.6724957776 | -1.6400028748 | -4.1858007429 |
|                        |            | C             | 6.0           | 1.8329133389  | -0.3488534163 | -4.0406540983 |
|                        |            | C             | 6.0           | 3.1224985772  | 0.3098889646  | -3.8769414685 |
|                        |            | H             | 1.0           | 6.5712339627  | 2.0916084424  | -3.6705375949 |
|                        |            | C             | 6.0           | 5.6105244977  | 1.5937245681  | -3.7122143315 |
|                        |            | C             | 6.0           | -0.1391898664 | -1.3964052562 | -2.9684296143 |
|                        |            | C             | 6.0           | 1.1256108210  | -0.7561795042 | -2.8504505903 |
|                        |            | H             | 1.0           | -5.8113103422 | -2.5571230063 | -1.4068502277 |
|                        |            | C             | 6.0           | 3.6921313361  | 0.5503790198  | -2.5831293399 |
|                        |            | H             | 1.0           | -2.7500339996 | -2.0111234626 | -2.7961760754 |
|                        |            | C             | 6.0           | 4.9652123990  | 1.2112211143  | -2.5410091566 |
|                        |            | H             | 1.0           | -5.6547696993 | -2.9095305599 | 0.3020412795  |
|                        |            | H             | 1.0           | -1.9768076535 | -3.5277042652 | -2.3753162855 |
|                        |            | C             | 6.0           | -5.5430267940 | -3.3545620387 | -0.6974639548 |
|                        |            | C             | 6.0           | -2.1659082108 | -2.5079591316 | -2.0149946932 |
|                        |            | H             | 1.0           | 6.7234130097  | 3.1051083825  | -1.6683469319 |
|                        |            | O             | 8.0           | -6.3470451592 | -4.4962011471 | -0.8561138170 |
|                        |            | H             | 1.0           | 7.5518057890  | 1.5259099595  | -1.7278612487 |
|                        |            | C             | 6.0           | -0.8489427671 | -1.7876533302 | -1.8267037914 |
|                        |            | C             | 6.0           | 1.6884581037  | -0.5263563543 | -1.5624491431 |
|                        |            | O             | 8.0           | 5.5059864264  | 1.4450536923  | -1.3090033094 |
|                        |            | C             | 6.0           | 2.9771763178  | 0.1238999268  | -1.3857894403 |
|                        |            | C             | 6.0           | 6.7536815406  | 2.0965278765  | -1.2313055010 |
|                        |            | H             | 1.0           | -5.7149622586 | -5.2006416404 | -1.0925196335 |
|                        |            | C             | 6.0           | -4.0762456869 | -3.6966943542 | -0.9074184456 |
|                        |            | C             | 6.0           | -3.0293111673 | -2.5966309631 | -0.7376074382 |
|                        |            | C             | 6.0           | -0.2952906478 | -1.5512193945 | -0.5504907856 |
| O                      | 8.0        | -3.7432252548 | -1.3870304008 | -0.4979694638 |               |               |
| O                      | 8.0        | 3.4364543303  | 0.2976048226  | -0.2011381142 |               |               |
| C                      | 6.0        | 0.9589921360  | -0.9378484151 | -0.4140915808 |               |               |
| H                      | 1.0        | 6.9822305240  | 2.1760835099  | -0.1663478391 |               |               |
| H                      | 1.0        | -3.2000234555 | -0.8485236304 | 0.1058346728  |               |               |
| O                      | 8.0        | -3.7762096226 | -4.8492742986 | -1.1889940681 |               |               |
| H                      | 1.0        | -1.6609005845 | -3.9292251376 | 0.2748134240  |               |               |
| C                      | 6.0        | -2.1336708795 | -2.9610295288 | 0.4687595072  |               |               |

|                         |            |   |     |               |               |               |
|-------------------------|------------|---|-----|---------------|---------------|---------------|
|                         |            | C | 6.0 | -1.0543857679 | -1.8981011837 | 0.6982555628  |
|                         |            | H | 1.0 | 2.3868317628  | -0.2980054574 | 0.6206883718  |
|                         |            | O | 8.0 | 1.4721567132  | -0.7474927768 | 0.8202514876  |
|                         |            | H | 1.0 | -2.5356520581 | 1.6088342365  | 1.3181068301  |
|                         |            | O | 8.0 | -1.6933172804 | -0.6658585594 | 1.1835775805  |
|                         |            | H | 1.0 | -2.7498781718 | -3.0689940630 | 1.3699407750  |
|                         |            | H | 1.0 | -0.3512915627 | -2.2342668545 | 1.4674528445  |
|                         |            | H | 1.0 | -4.9387992903 | 1.7370009408  | 2.0136139322  |
|                         |            | H | 1.0 | -4.1324577348 | 3.3158356968  | 2.1374672778  |
|                         |            | H | 1.0 | -0.1604024895 | 1.6225413113  | 1.8585580368  |
|                         |            | C | 6.0 | -2.8172788840 | 1.6227157138  | 2.3777404994  |
|                         |            | C | 6.0 | -4.1676874354 | 2.3004477809  | 2.5451802641  |
|                         |            | H | 1.0 | 0.8757098201  | 4.0066555931  | 2.8262399348  |
|                         |            | C | 6.0 | -1.8425396584 | -0.5428555533 | 2.5955190176  |
|                         |            | O | 8.0 | -2.9769339962 | 0.2611966327  | 2.8382161593  |
|                         |            | H | 1.0 | -1.5957039459 | 3.3222487434  | 2.8538170300  |
|                         |            | H | 1.0 | 2.2761005437  | 1.8221242936  | 2.2088459698  |
|                         |            | H | 1.0 | -2.0887640122 | -1.5214412050 | 3.0308786367  |
|                         |            | C | 6.0 | -0.3684489318 | 1.5253667206  | 2.9404634755  |
|                         |            | C | 6.0 | -1.6921131275 | 2.2848153766  | 3.1892768931  |
|                         |            | H | 1.0 | -4.4344091294 | 2.3643151966  | 3.6027942339  |
|                         |            | H | 1.0 | 0.2756809564  | -0.5509621556 | 2.8977954080  |
|                         |            | C | 6.0 | -0.5796025306 | 0.0283748193  | 3.2479134522  |
|                         |            | C | 6.0 | 0.8094650360  | 3.5026997741  | 3.8113199151  |
|                         |            | H | 1.0 | -0.0628336134 | 3.8840955159  | 4.3461884024  |
|                         |            | N | 7.0 | 0.7618910770  | 2.0476594609  | 3.7317710585  |
|                         |            | C | 6.0 | 2.0440017925  | 1.5306840080  | 3.2483590557  |
|                         |            | H | 1.0 | 1.6982816239  | 3.7907419223  | 4.3823059788  |
|                         |            | H | 1.0 | 2.0657189157  | 0.4408594156  | 3.2909149333  |
|                         |            | H | 1.0 | -2.3294105734 | 1.4635340422  | 4.8158097002  |
|                         |            | O | 8.0 | -2.0489867709 | 2.3567503633  | 4.5689061627  |
|                         |            | H | 1.0 | -0.6530572229 | -0.0979317817 | 4.3354221550  |
|                         |            | H | 1.0 | 2.8438562700  | 1.9045828679  | 3.8964383105  |
|                         |            | H | 1.0 | 5.3395360926  | -2.4020310356 | -1.8254288497 |
|                         |            | H | 1.0 | 1.5263214802  | -1.1815925652 | -3.5947756440 |
|                         |            | H | 1.0 | 0.5547181227  | 0.7388414063  | -2.3867122026 |
|                         |            | H | 1.0 | 5.3955844679  | -3.8584856091 | -2.8801334551 |
|                         |            | C | 6.0 | 4.8024511894  | -3.2953922834 | -2.1577838120 |
|                         |            | H | 1.0 | 2.8457335586  | -0.2482331291 | -2.9013483367 |
|                         |            | H | 1.0 | 3.0679963334  | 1.5103998872  | -1.7425053513 |
|                         |            | C | 6.0 | 1.9865064234  | -0.8803408759 | -2.6489691596 |
|                         |            | H | 1.0 | 1.0285751392  | -3.6055133254 | -2.5932787256 |
|                         |            | C | 6.0 | 0.9678005056  | -0.0962866483 | -1.8149247231 |
| N,N-dimethyl-daunomycin | 70095-84-0 |   |     |               |               |               |

|   |     |               |               |               |
|---|-----|---------------|---------------|---------------|
| C | 6.0 | 3.4852369141  | -2.8976271939 | -2.7900110250 |
| H | 1.0 | 4.6232905629  | -3.8882625680 | -1.2553382509 |
| O | 8.0 | -1.4918878848 | 0.9812079993  | -1.0452141950 |
| O | 8.0 | 3.2222088859  | -3.1643617539 | -3.9504879494 |
| H | 1.0 | -2.4540868019 | 1.1487341345  | -0.6994800005 |
| C | 6.0 | -0.1467917726 | -0.9640481949 | -1.2950188636 |
| H | 1.0 | 3.7627812944  | 1.0063379310  | 0.6568163496  |
| C | 6.0 | 2.4692338716  | -2.1472167357 | -1.9120972866 |
| C | 6.0 | 1.2612721837  | -3.0764665107 | -1.6594492718 |
| C | 6.0 | -1.3492267688 | -0.3534964898 | -0.9027962133 |
| C | 6.0 | 2.4107346294  | 1.6497437749  | -0.8742074362 |
| H | 1.0 | 4.0015295289  | 2.6751926779  | 0.1469777548  |
| C | 6.0 | 0.0189423690  | -2.3614491088 | -1.1727518398 |
| C | 6.0 | 3.2386477888  | 1.9256343388  | 0.3832840944  |
| O | 8.0 | 1.6412334532  | 0.4904582863  | -0.6359930962 |
| O | 8.0 | -3.7553152254 | 0.8003146160  | -0.1191253500 |
| H | 1.0 | 4.1768092322  | 0.9188893490  | 2.7324131691  |
| C | 6.0 | -2.4123411523 | -1.1302394561 | -0.3643141198 |
| C | 6.0 | -1.0178848345 | -3.1397903430 | -0.6442794084 |
| C | 6.0 | -3.6453163702 | -0.4664148865 | 0.0322928086  |
| H | 1.0 | 1.5495617436  | -3.8460123628 | -0.9358751208 |
| H | 1.0 | -8.2264493874 | 0.7542404204  | 0.7552940600  |
| O | 8.0 | 1.6087924726  | 2.7672436276  | -1.2252564577 |
| C | 6.0 | -2.2365138753 | -2.5371579386 | -0.2291480834 |
| O | 8.0 | -0.8457047150 | -4.4770944944 | -0.5437031619 |
| H | 1.0 | -7.2899012584 | 2.2277830619  | 1.1264696062  |
| O | 8.0 | -6.1480176989 | 0.5954317077  | 0.9033839954  |
| H | 1.0 | 2.6035671747  | -1.1086109712 | -0.2772755377 |
| O | 8.0 | 3.1353807653  | -1.8089925829 | -0.6935913039 |
| C | 6.0 | -4.7113313607 | -1.2904381107 | 0.5928406557  |
| H | 1.0 | -1.7149938575 | -4.8039265173 | -0.1325091207 |
| C | 6.0 | -7.3722946341 | 1.1560036056  | 1.3195630944  |
| C | 6.0 | -3.2888799926 | -3.3597724120 | 0.3179441853  |
| C | 6.0 | -5.9687460558 | -0.7528942872 | 1.0279713524  |
| C | 6.0 | -4.5243559966 | -2.7055700939 | 0.7265051413  |
| H | 1.0 | 2.6443217184  | 4.5771243190  | -0.2496504827 |
| C | 6.0 | 3.6970011635  | 1.6336654167  | 3.4054463180  |
| O | 8.0 | -3.1464968694 | -4.6279390109 | 0.4438800197  |
| H | 1.0 | 2.8640324176  | 1.1078702422  | 3.9127525697  |
| H | 1.0 | 4.4322379331  | 1.9140132880  | 4.1676378281  |
| C | 6.0 | 2.3874098709  | 2.4725060006  | 1.5474571748  |
| C | 6.0 | -6.9559757161 | -1.5796868856 | 1.5536694728  |
| C | 6.0 | -5.5459723845 | -3.5203924876 | 1.2644815554  |
| H | 1.0 | -7.9018813070 | -1.1647869889 | 1.8790209950  |

|                          |                            |                                                                                                                                                                                                                                                                                                                                                                                                                                                                                                                                                                                                                                                                                                                                                                                                                                                                                                                                                                                                                                                                                                                                                                                                                                                  |
|--------------------------|----------------------------|--------------------------------------------------------------------------------------------------------------------------------------------------------------------------------------------------------------------------------------------------------------------------------------------------------------------------------------------------------------------------------------------------------------------------------------------------------------------------------------------------------------------------------------------------------------------------------------------------------------------------------------------------------------------------------------------------------------------------------------------------------------------------------------------------------------------------------------------------------------------------------------------------------------------------------------------------------------------------------------------------------------------------------------------------------------------------------------------------------------------------------------------------------------------------------------------------------------------------------------------------|
|                          |                            | H 1.0 1.6630543308 1.6945813193 1.8531216246<br>C 6.0 0.6924862012 3.1573322107 -0.1714407916<br>C 6.0 -6.7386777776 -2.9676880422 1.6699964766<br>H 1.0 -5.3462426887 -4.5829778909 1.3402315874<br>N 7.0 3.2692189577 2.8233066157 2.6796949909<br>H 1.0 -7.5590014280 0.9978027458 2.3917334488<br>O 8.0 2.3228742463 4.7766119528 0.6426526132<br>H 1.0 0.0961302546 2.2869371003 0.1145041851<br>H 1.0 -0.7556235731 3.7966613605 -1.6167303122<br>H 1.0 0.3346187261 5.1007166055 -1.0683207861<br>H 1.0 -7.5250218924 -3.5944370760 2.0840431908<br>C 6.0 1.5318519056 3.6482190261 1.0182248238<br>C 6.0 -0.2266625729 4.2148558084 -0.7579135381<br>H 1.0 0.8526701571 3.9961205473 1.8032637292<br>C 6.0 2.7258221559 3.8098057298 3.6045669576<br>H 1.0 -0.9681857710 4.5195871942 -0.0125402757<br>H 1.0 3.4683654974 3.9972209117 4.3880771803<br>H 1.0 1.7911623388 3.4906920422 4.1075172368<br>H 1.0 2.5446549293 4.7526424456 3.0862360562                                                                                                                                                                                                                                                                                      |
| Doxorubicin / Adriamycin | 25316-40-9 /<br>23214-92-8 | H 1.0 -2.7202958187 -4.6947561437 -0.6773970421<br>H 1.0 -2.6770208139 -3.9289650280 0.7754357082<br>H 1.0 7.2640481612 -0.9073455788 2.4420069025<br>H 1.0 6.5132738062 -3.2677929902 -1.4305172735<br>N 7.0 -2.7048039261 -3.7820138597 -0.2300983696<br>H 1.0 7.2014365972 -1.8384350843 0.1600821880<br>O 8.0 -4.0263222136 -4.3819192232 -2.5855499953<br>C 6.0 6.3599636154 -0.7966141730 1.8479083402<br>H 1.0 -1.6281132396 -3.4885506687 -3.6139774789<br>C 6.0 6.3266131055 -1.3286953956 0.5438951201<br>H 1.0 -4.0008696347 -4.3613581077 -3.5508699676<br>H 1.0 -1.2319548069 -2.8779834602 -2.0050245612<br>H 1.0 -4.8359235514 -3.5407959157 -0.1925380042<br>H 1.0 5.2536745045 0.2728759093 3.3611686520<br>C 6.0 6.2481266760 -2.3810904767 -2.0243296275<br>C 6.0 -3.9261785465 -3.0568067785 -0.5945064608<br>C 6.0 5.2617315800 -0.1469137752 2.3620442806<br>C 6.0 -1.6548148049 -2.6017908236 -2.9706043691<br>H 1.0 5.9690471689 -2.6970259443 -3.0317450734<br>H 1.0 7.1292319878 -1.7260729958 -2.0851757919<br>C 6.0 5.1844432326 -1.2024258884 -0.2417064701<br>C 6.0 -4.0918483689 -3.0290283771 -2.1228900360<br>O 8.0 5.1210005450 -1.7109594388 -1.5066731349<br>H 1.0 -1.0366192910 -1.8196795212 -3.4171555197 |



|   |     |               |               |               |
|---|-----|---------------|---------------|---------------|
| C | 6.0 | 4.0879056053  | -0.0056718369 | 1.5874976915  |
| H | 1.0 | -3.6041441091 | -1.6151464172 | 1.0006065343  |
| C | 6.0 | 4.0197865572  | -0.5298704011 | 0.2558080264  |
| H | 1.0 | -1.8413178976 | -1.1323311143 | -0.6970403072 |
| C | 6.0 | -3.0928789838 | -2.0887732077 | -2.8419155758 |
| C | 6.0 | -3.8672841074 | -1.6154297691 | -0.0634434849 |
| H | 1.0 | -5.0950481960 | -2.6154627676 | -2.3165273871 |
| C | 6.0 | 2.9613892118  | 0.6856241865  | 2.1908898936  |
| O | 8.0 | 3.0409598165  | 1.1633253561  | 3.3837996766  |
| H | 1.0 | -3.4813096224 | -1.9292732595 | -3.8598563573 |
| C | 6.0 | -2.8646204154 | -0.7655885873 | -0.8386420739 |
| H | 1.0 | -4.8484323664 | -1.1365947032 | -0.1607844125 |
| C | 6.0 | 2.7998301954  | -0.3611079999 | -0.5360317912 |
| H | 1.0 | 1.6837628121  | 1.7697848198  | 3.5375159515  |
| C | 6.0 | 1.7513507688  | 0.8168482229  | 1.4203061712  |
| O | 8.0 | 0.7224148453  | 2.0161367011  | 3.2475613028  |
| O | 8.0 | -3.1921262087 | -0.7988104994 | -2.2400579574 |
| C | 6.0 | 1.6713788058  | 0.3147913271  | 0.0894805385  |
| C | 6.0 | 0.6265503885  | 1.4669707687  | 1.9977809648  |
| O | 8.0 | 2.6995697164  | -0.7767473762 | -1.7378645517 |
| H | 1.0 | -2.6458306710 | 1.6832987609  | 1.7774327829  |
| H | 1.0 | 1.3043524961  | -0.3477810791 | -2.1022353913 |
| C | 6.0 | 0.4662031797  | 0.5010994487  | -0.6595103109 |
| C | 6.0 | -0.5550244030 | 1.5753997588  | 1.2757607353  |
| O | 8.0 | -2.9940220902 | 0.5495297051  | -0.4101857170 |
| O | 8.0 | 0.3855264259  | 0.0721179177  | -1.9335469930 |
| H | 1.0 | -1.6069814329 | 2.6746991547  | 2.8075831340  |
| C | 6.0 | -0.6292412601 | 1.1402629507  | -0.0662598120 |
| C | 6.0 | -1.7536643675 | 2.3185110418  | 1.7922864486  |
| C | 6.0 | -1.9089898859 | 1.4484764327  | -0.8160772845 |
| H | 1.0 | -1.7515205016 | 1.3109593012  | -1.8872317476 |
| C | 6.0 | -1.9918164264 | 3.4752370660  | 0.8056500050  |
| O | 8.0 | -0.4355315788 | 4.6402810287  | 3.0977341242  |
| H | 1.0 | 1.0652297933  | 4.8056610452  | 1.6509264787  |
| C | 6.0 | -2.4473986319 | 2.8788486391  | -0.5381818330 |
| H | 1.0 | -0.0076226427 | 3.7836385084  | 3.3095151968  |
| H | 1.0 | -2.7070488311 | 4.6297071910  | 2.1804516686  |
| H | 1.0 | -3.5390217104 | 2.8234718680  | -0.5252412922 |
| O | 8.0 | -2.9959800938 | 4.3871808145  | 1.2859268135  |
| C | 6.0 | -0.0051351459 | 5.0016978499  | 1.8007140447  |
| C | 6.0 | -0.7267939377 | 4.3643854419  | 0.5965332593  |
| H | 1.0 | -2.1412832038 | 3.5457702686  | -1.3463023968 |
| O | 8.0 | -0.3355875103 | 4.6904039501  | -0.5087652422 |
| H | 1.0 | -0.1418771864 | 6.0851482908  | 1.6930576092  |

|             |            |                                                                                                                                                                                                                                                                                                                                                                                                                                                                                                                                                                                                                                                                                                                                                                                                                                                                                                                                                                                                                                                                                                                                                                                                                                                                                                                                                                                                                                                                                                                                                                                                                                                                                                                                                                                                                                                                                                                                                                                                                                                                                                                       |
|-------------|------------|-----------------------------------------------------------------------------------------------------------------------------------------------------------------------------------------------------------------------------------------------------------------------------------------------------------------------------------------------------------------------------------------------------------------------------------------------------------------------------------------------------------------------------------------------------------------------------------------------------------------------------------------------------------------------------------------------------------------------------------------------------------------------------------------------------------------------------------------------------------------------------------------------------------------------------------------------------------------------------------------------------------------------------------------------------------------------------------------------------------------------------------------------------------------------------------------------------------------------------------------------------------------------------------------------------------------------------------------------------------------------------------------------------------------------------------------------------------------------------------------------------------------------------------------------------------------------------------------------------------------------------------------------------------------------------------------------------------------------------------------------------------------------------------------------------------------------------------------------------------------------------------------------------------------------------------------------------------------------------------------------------------------------------------------------------------------------------------------------------------------------|
|             |            |                                                                                                                                                                                                                                                                                                                                                                                                                                                                                                                                                                                                                                                                                                                                                                                                                                                                                                                                                                                                                                                                                                                                                                                                                                                                                                                                                                                                                                                                                                                                                                                                                                                                                                                                                                                                                                                                                                                                                                                                                                                                                                                       |
| Duborimycin | NSC 180510 | H 1.0 0.0876837715 4.1440533871 -7.4706420919<br>H 1.0 -1.1282462431 2.0889047092 -6.7088118222<br>C 6.0 0.2839631013 3.7068490090 -6.4944371578<br>H 1.0 1.7546054253 5.2006059475 -5.9896392781<br>C 6.0 -0.3887590862 2.5786970268 -6.0858825757<br>C 6.0 1.2372047998 4.3120193076 -5.6498701221<br>H 1.0 3.7038173235 5.3267220582 -4.8809759563<br>O 8.0 -1.7410451201 0.3100913878 -5.2587051524<br>C 6.0 -0.1339388329 2.0118236801 -4.8166662499<br>H 1.0 2.4169900245 6.3366481892 -4.1690558965<br>C 6.0 1.5097900229 3.7758777061 -4.3959833267<br>C 6.0 3.1048099744 5.5008071357 -3.9752281151<br>C 6.0 -0.8861044109 0.8197851859 -4.4502662324<br>C 6.0 0.8309735615 2.5991293830 -3.9331143700<br>H 1.0 -2.2316587044 -0.8995362560 -4.4143369589<br>O 8.0 2.4261302756 4.3396427022 -3.5540894290<br>H 1.0 3.7715357981 5.7707083775 -3.1533765346<br>O 8.0 -2.2479067995 -1.4987920281 -3.5948791318<br>C 6.0 -0.6389147142 0.2359978623 -3.1534636253<br>C 6.0 1.0824509941 1.9966425622 -2.6292184724<br>C 6.0 -1.3510185750 -0.9285938999 -2.7590013548<br>C 6.0 0.3186398105 0.8116547737 -2.2700352036<br>O 8.0 1.9412445032 2.4665410847 -1.8013278389<br>C 6.0 -1.1284482058 -1.5141812102 -1.5061819656<br>H 1.0 -2.9471914339 -2.6502499087 -1.4098152952<br>H 1.0 -1.5377378707 -3.5746274626 -1.8587670127<br>C 6.0 0.5327648002 0.2065300786 -1.0011944103<br>H 1.0 1.8154099831 1.5457236020 -0.6872731230<br>C 6.0 -1.8854494442 -2.7845042196 -1.1778227541<br>C 6.0 -0.1815579391 -0.9441448470 -0.6272239194<br>H 1.0 -1.1567491735 -5.6657600445 -1.2244863731<br>O 8.0 1.4389805196 0.7386834997 -0.1474541736<br>C 6.0 -1.3066435031 -5.8018518826 -0.1498501127<br>C 6.0 -1.7629089344 -3.2610766150 0.2770413225<br>H 1.0 -3.2058632798 -4.7983732562 -0.0770464018<br>H 1.0 -1.7509269921 -6.7889235232 0.0110387663<br>H 1.0 -0.3328024160 -5.7912830561 0.3478917793<br>C 6.0 0.0773515709 -1.5612155601 0.7256754096<br>H 1.0 0.3664188682 -3.5991454428 0.1626830846<br>C 6.0 -2.2281979342 -4.7375647312 0.4346901306<br>H 1.0 1.1328901718 -1.4582142223 0.9888073473 |

|            |            |   |     |               |               |               |
|------------|------------|---|-----|---------------|---------------|---------------|
|            |            | C | 6.0 | -0.3322818207 | -3.0333052204 | 0.7895025859  |
|            |            | O | 8.0 | -2.7087030456 | -2.5478754534 | 1.1084369779  |
|            |            | H | 1.0 | -2.2586560436 | -1.7630391844 | 1.4659747281  |
|            |            | O | 8.0 | -0.6940468398 | -0.8551605909 | 1.7652422774  |
|            |            | H | 1.0 | -0.2377891232 | -3.3990097227 | 1.8160034366  |
|            |            | O | 8.0 | -2.3911565698 | -5.0324343327 | 1.8173315965  |
|            |            | H | 1.0 | -2.7594485900 | -4.2025079582 | 2.1697759315  |
|            |            | O | 8.0 | 0.7152107620  | -0.7540049832 | 3.5595428033  |
|            |            | C | 6.0 | 0.0265979047  | 0.0274112065  | 2.5658407298  |
|            |            | H | 1.0 | 0.7587118640  | 0.5532999207  | 1.9452530691  |
|            |            | H | 1.0 | -1.6872911942 | 0.3864675745  | 3.7783792137  |
|            |            | C | 6.0 | -0.9448687089 | 0.9886745935  | 3.2425888314  |
|            |            | H | 1.0 | 3.3693784654  | -0.3026884135 | 3.3221900681  |
|            |            | H | 1.0 | -1.4686485936 | 1.5846640826  | 2.4888235503  |
|            |            | H | 1.0 | 1.8729412003  | -0.7195769897 | 5.1949813878  |
|            |            | C | 6.0 | 1.5523382495  | 0.0045248702  | 4.4365258758  |
|            |            | C | 6.0 | 2.8212873432  | 0.5364799445  | 3.7602216503  |
|            |            | H | 1.0 | -0.0084627141 | 0.4778431084  | 5.8028743262  |
|            |            | H | 1.0 | 2.6181139275  | 1.2546776975  | 2.9646865577  |
|            |            | C | 6.0 | 0.6798091154  | 1.0510421219  | 5.1602162120  |
|            |            | C | 6.0 | -0.2028623591 | 1.9112026247  | 4.2220364013  |
|            |            | H | 1.0 | 0.8592272420  | 2.6621183469  | 2.6174181507  |
|            |            | H | 1.0 | 3.4575425894  | 1.0247460323  | 4.5031949216  |
|            |            | H | 1.0 | -0.9532363385 | 2.3951467819  | 4.8711193058  |
|            |            | N | 7.0 | 0.5024103255  | 2.9836376764  | 3.5127331148  |
|            |            | O | 8.0 | 1.5382759173  | 1.8638462251  | 5.9680482946  |
|            |            | H | 1.0 | 1.3032702837  | 3.2785692533  | 4.0668784308  |
|            |            | H | 1.0 | 0.9703906187  | 2.4296223572  | 6.5088615871  |
|            |            | H | 1.0 | -0.6820815571 | 4.7792495056  | 0.7355405074  |
|            |            | H | 1.0 | -2.2614896851 | 5.0968679552  | -1.5836436430 |
|            |            | O | 8.0 | -1.5058991282 | 5.0891295991  | 0.3062039779  |
|            |            | H | 1.0 | 7.5127102519  | -0.7856244056 | -2.6393470313 |
|            |            | C | 6.0 | -1.5923956299 | 4.4823299757  | -0.9683218324 |
|            |            | H | 1.0 | -0.6241112351 | 4.4609120609  | -1.4867351888 |
|            |            | O | 8.0 | -2.2439289441 | 2.5374797811  | -2.1428915779 |
|            |            | H | 1.0 | 7.8870640425  | 0.6460643083  | -0.9498610838 |
|            |            | H | 1.0 | 7.8088335491  | 2.8337028582  | 0.1859864483  |
|            |            | C | 6.0 | 6.9295554349  | 1.0402307914  | -0.6331705908 |
|            |            | C | 6.0 | 6.8828192917  | 2.2892816204  | 0.0170631378  |
|            |            | C | 6.0 | 7.0116716254  | -1.4287194458 | -1.9016335701 |
|            |            | C | 6.0 | -2.1505694558 | 3.0467153547  | -1.0410065292 |
|            |            | H | 1.0 | 6.7797204294  | -2.3896985227 | -2.3655421654 |
|            |            | O | 8.0 | 5.7747931213  | -0.8956744827 | -1.4842896029 |
| Epirubicin | 56390-09-1 | H | 1.0 | -0.6820815571 | 4.7792495056  | 0.7355405074  |
|            |            | H | 1.0 | -2.2614896851 | 5.0968679552  | -1.5836436430 |
|            |            | O | 8.0 | -1.5058991282 | 5.0891295991  | 0.3062039779  |
|            |            | H | 1.0 | 7.5127102519  | -0.7856244056 | -2.6393470313 |
|            |            | C | 6.0 | -1.5923956299 | 4.4823299757  | -0.9683218324 |
|            |            | H | 1.0 | -0.6241112351 | 4.4609120609  | -1.4867351888 |
|            |            | O | 8.0 | -2.2439289441 | 2.5374797811  | -2.1428915779 |
|            |            | H | 1.0 | 7.8870640425  | 0.6460643083  | -0.9498610838 |
|            |            | H | 1.0 | 7.8088335491  | 2.8337028582  | 0.1859864483  |
|            |            | C | 6.0 | 6.9295554349  | 1.0402307914  | -0.6331705908 |
|            |            | C | 6.0 | 6.8828192917  | 2.2892816204  | 0.0170631378  |
|            |            | C | 6.0 | 7.0116716254  | -1.4287194458 | -1.9016335701 |
|            |            | C | 6.0 | -2.1505694558 | 3.0467153547  | -1.0410065292 |
|            |            | H | 1.0 | 6.7797204294  | -2.3896985227 | -2.3655421654 |
|            |            | O | 8.0 | 5.7747931213  | -0.8956744827 | -1.4842896029 |

|   |     |               |               |               |
|---|-----|---------------|---------------|---------------|
| H | 1.0 | 5.6105557043  | 3.7664929191  | 0.9419014068  |
| C | 6.0 | 5.7611359756  | 0.3202366677  | -0.8644466103 |
| C | 6.0 | 5.6804876690  | 2.8107340503  | 0.4356760343  |
| H | 1.0 | 7.6987240313  | -1.5928761084 | -1.0589178750 |
| C | 6.0 | 4.4782394389  | 2.1009145066  | 0.2163604606  |
| C | 6.0 | 4.4869760156  | 0.8312049902  | -0.4496435454 |
| H | 1.0 | 1.7020560915  | -1.2615934129 | -1.3316097083 |
| C | 6.0 | 3.2440158634  | 2.7025307041  | 0.6920779469  |
| H | 1.0 | -1.5527935107 | 3.3310491665  | 1.8218719975  |
| C | 6.0 | 3.2303485629  | 0.1205450307  | -0.6868446402 |
| O | 8.0 | 0.7164937730  | -1.0900064048 | -1.0966633539 |
| O | 8.0 | 3.2462912018  | 3.8500209289  | 1.2739707144  |
| C | 6.0 | 2.0173260941  | 1.9711395607  | 0.5037047678  |
| C | 6.0 | 2.0062776968  | 0.7173722168  | -0.1717640802 |
| H | 1.0 | -5.9338835117 | -2.0798478290 | -1.1747783138 |
| H | 1.0 | -3.6069291831 | 3.9077573358  | 0.8960935697  |
| H | 1.0 | 1.7821545557  | 4.0239584162  | 1.5621902396  |
| C | 6.0 | 0.7595404703  | 0.0596264831  | -0.3947847670 |
| C | 6.0 | 0.8011181402  | 2.5114159793  | 0.9947469474  |
| C | 6.0 | -2.6889845174 | 2.3432135057  | 0.2342606244  |
| O | 8.0 | 0.7868856438  | 3.7499165025  | 1.5742796295  |
| O | 8.0 | 3.1720923155  | -0.9847209760 | -1.3239216323 |
| H | 1.0 | -1.6959640780 | -0.2077880681 | -1.3871836799 |
| C | 6.0 | -0.3882421626 | 1.8011680419  | 0.8546841818  |
| C | 6.0 | -1.6828691855 | 2.3426910625  | 1.3905872594  |
| C | 6.0 | -0.4333718502 | 0.6122633569  | 0.0947413282  |
| O | 8.0 | -3.8980005509 | 3.0393502296  | 0.5748504837  |
| H | 1.0 | -3.6972373944 | 0.8003651167  | -0.9093851130 |
| C | 6.0 | -1.7605712320 | -0.0046930254 | -0.3136473442 |
| C | 6.0 | -5.6926261320 | -3.0007818291 | -0.6366029083 |
| C | 6.0 | -3.0163518059 | 0.8781047779  | -0.0590791634 |
| H | 1.0 | -6.4774186167 | -3.2063451581 | 0.0957448021  |
| H | 1.0 | -5.6616854471 | -3.8225652091 | -1.3603666854 |
| H | 1.0 | -2.0844400779 | 1.6949014174  | 2.1813245732  |
| O | 8.0 | -3.3670360453 | -2.6172413839 | -0.9502872509 |
| H | 1.0 | -4.3815994690 | -2.0172353054 | 0.7632314306  |
| C | 6.0 | -4.3500479099 | -2.8640662360 | 0.0638962576  |
| H | 1.0 | -3.5327991078 | 0.4907862529  | 0.8240638503  |
| O | 8.0 | -1.9430680229 | -1.2780174691 | 0.3635933046  |
| H | 1.0 | -1.4293327791 | -2.2792296084 | -1.3574070212 |
| C | 6.0 | -2.0403258527 | -2.4089331973 | -0.4607051612 |
| C | 6.0 | -3.9611580769 | -4.1155120180 | 0.8624151187  |
| H | 1.0 | -3.9297760722 | -4.9682173457 | 0.1552435695  |
| O | 8.0 | -4.9163472759 | -4.3534162314 | 1.8843152203  |

|            |            |   |     |               |               |               |
|------------|------------|---|-----|---------------|---------------|---------------|
|            |            | C | 6.0 | -1.5618690788 | -3.6145159597 | 0.3551981316  |
|            |            | H | 1.0 | -2.6123957475 | -3.0921623915 | 2.1588982641  |
|            |            | H | 1.0 | -1.4705481764 | -4.4756228185 | -0.3206921253 |
|            |            | C | 6.0 | -2.5627462175 | -3.9413471282 | 1.4676095162  |
|            |            | H | 1.0 | -4.4278802022 | -4.8922383218 | 2.5309488725  |
|            |            | H | 1.0 | -0.5684399248 | -3.3919401207 | 0.7559287087  |
|            |            | N | 7.0 | -2.2706539305 | -5.1347596261 | 2.2850375037  |
|            |            | H | 1.0 | -2.0057077161 | -5.9057289637 | 1.6721187114  |
|            |            | H | 1.0 | -1.4634635926 | -4.9574844815 | 2.8784515504  |
|            |            | H | 1.0 | 3.2289213262  | 2.3199864348  | -5.6787783154 |
|            |            | O | 8.0 | 2.9090951825  | 1.5969930967  | -5.1255937500 |
|            |            | H | 1.0 | 3.1967298006  | 2.7655778055  | -3.4031378428 |
|            |            | H | 1.0 | -0.5286622965 | 6.5619242990  | -1.1439559130 |
|            |            | C | 6.0 | 3.4574062783  | 1.7882632725  | -3.8380179107 |
|            |            | H | 1.0 | 4.5580707106  | 1.7423203195  | -3.8361078379 |
|            |            | H | 1.0 | -2.8533164942 | 3.4224556449  | 0.6943411040  |
|            |            | H | 1.0 | -1.5301706620 | 2.1692826047  | -0.9162136692 |
|            |            | O | 8.0 | -0.6116790027 | 3.9524520285  | -0.7728210810 |
|            |            | H | 1.0 | 1.0108881517  | 5.8100554151  | -1.5969569456 |
|            |            | H | 1.0 | -1.7581073031 | 5.7431682674  | 0.9514202988  |
|            |            | C | 6.0 | 0.3833427250  | 6.1015360266  | -0.7495969481 |
|            |            | C | 6.0 | -1.0005406590 | 2.7276493653  | -0.1407028894 |
|            |            | H | 1.0 | 0.2982056186  | 1.3460479460  | -1.6403801935 |
|            |            | C | 6.0 | -1.9147954608 | 2.9860489509  | 1.0561257690  |
|            |            | C | 6.0 | 2.9504239696  | 0.6851219399  | -2.9027669331 |
|            |            | O | 8.0 | 2.3503462533  | -0.2771137057 | -3.3273781389 |
|            |            | C | 6.0 | 0.0388095469  | 4.8847013913  | 0.0994121814  |
|            |            | H | 1.0 | 2.1848076773  | 2.7796473181  | -1.2567191825 |
|            |            | H | 1.0 | 0.9227011992  | 6.8482322654  | -0.1568118737 |
|            |            | H | 1.0 | -2.1416704885 | 2.0208645680  | 1.5185378133  |
|            |            | C | 6.0 | -0.8543261287 | 5.2258489095  | 1.2990458133  |
|            |            | H | 1.0 | -2.3048468416 | -0.8659258933 | 0.0754469808  |
|            |            | C | 6.0 | 0.8124419952  | 1.2128776476  | -0.6785808209 |
|            |            | C | 6.0 | -1.2759125034 | 3.9574646972  | 2.0506629030  |
|            |            | O | 8.0 | 0.1081042620  | 1.9968959061  | 0.3139555339  |
|            |            | C | 6.0 | 2.2249009301  | 1.8081958974  | -0.7533214173 |
|            |            | N | 7.0 | -2.2457015355 | 4.2998176051  | 3.1057938662  |
|            |            | H | 1.0 | -0.3186909195 | 5.9136002602  | 1.9692440652  |
|            |            | H | 1.0 | 0.9678286193  | 4.4287950687  | 0.4733848303  |
|            |            | O | 8.0 | 4.5246236249  | 1.6019324276  | -1.3130273160 |
|            |            | C | 6.0 | 3.2674406646  | 0.8935800848  | -1.4045811238 |
|            |            | H | 1.0 | 5.2220447682  | 0.9360458182  | -1.3919243117 |
|            |            | O | 8.0 | -1.5766709447 | -0.1795682064 | -0.1766632164 |
| Esorubicin | 63950-06-1 |   |     |               |               |               |

|                            |            |   |     |               |               |               |
|----------------------------|------------|---|-----|---------------|---------------|---------------|
|                            |            | H | 1.0 | -2.5409593659 | 3.4402468004  | 3.5673952791  |
|                            |            | H | 1.0 | -1.7748227107 | 4.8481394500  | 3.8249739909  |
|                            |            | C | 6.0 | 0.7996165866  | -0.2552126466 | -0.3009613605 |
|                            |            | H | 1.0 | -0.3673489658 | 3.4774992584  | 2.4511168233  |
|                            |            | H | 1.0 | 2.5680571521  | 1.9891682140  | 0.2711007561  |
|                            |            | C | 6.0 | -0.4324086139 | -0.8817865406 | -0.0426103423 |
|                            |            | H | 1.0 | 3.9073056958  | -1.1736601936 | -1.1799113158 |
|                            |            | C | 6.0 | 3.3358343346  | -0.4221430469 | -0.6223556895 |
|                            |            | H | 1.0 | -6.1600070313 | -4.2030274779 | 1.4753086225  |
|                            |            | C | 6.0 | 1.9910941114  | -1.0096730399 | -0.2582885329 |
|                            |            | H | 1.0 | -5.5531825619 | -5.7959597621 | 0.9462021976  |
|                            |            | O | 8.0 | -2.8413279053 | -2.1660731417 | 0.5220041818  |
|                            |            | C | 6.0 | -0.4830992171 | -2.2507369928 | 0.3476941372  |
|                            |            | O | 8.0 | -4.1648322494 | -4.2747156507 | 1.2995211237  |
|                            |            | C | 6.0 | -5.3661272670 | -4.9407219506 | 1.6119513014  |
|                            |            | C | 6.0 | -1.7731564041 | -2.8614980206 | 0.6367695225  |
|                            |            | H | 1.0 | 3.9133607892  | -0.2079835589 | 0.2889331306  |
|                            |            | C | 6.0 | 1.9609779599  | -2.3552727744 | 0.1220201068  |
|                            |            | C | 6.0 | 0.7312703043  | -2.9880163755 | 0.4411495449  |
|                            |            | H | 1.0 | 2.8381809759  | -3.9754838359 | 0.4733196656  |
|                            |            | C | 6.0 | -2.9902550135 | -4.9684623797 | 1.3820354089  |
|                            |            | C | 6.0 | -1.7857985160 | -4.2611549951 | 1.0528952630  |
|                            |            | H | 1.0 | -5.3853280682 | -5.2995216468 | 2.6515619279  |
|                            |            | O | 8.0 | 3.1252069175  | -3.0440614829 | 0.1819879128  |
|                            |            | H | 1.0 | -3.8682976529 | -6.8280062257 | 2.0167431910  |
|                            |            | C | 6.0 | -2.9533594947 | -6.3036735715 | 1.7701857382  |
|                            |            | C | 6.0 | -0.5551309050 | -4.9920543653 | 1.1443054911  |
|                            |            | C | 6.0 | 0.7261688497  | -4.3763181746 | 0.8342081990  |
|                            |            | C | 6.0 | -1.7249849639 | -6.9920587543 | 1.8477380496  |
|                            |            | C | 6.0 | -0.5487108221 | -6.3488420385 | 1.5405862875  |
|                            |            | O | 8.0 | 1.8151235137  | -5.0518182160 | 0.9098915316  |
|                            |            | H | 1.0 | -1.7206611491 | -8.0359517658 | 2.1530122005  |
|                            |            | H | 1.0 | 0.4124840868  | -6.8475095042 | 1.5889107122  |
| 11-Hydroxy aclacinomycin A | NSC 670121 | H | 1.0 | -8.0609413708 | -6.9240960627 | 0.0228441060  |
|                            |            | H | 1.0 | -6.6333813119 | -5.9863603973 | -1.7207062385 |
|                            |            | H | 1.0 | -7.7163266731 | -8.2727894507 | -1.0480492332 |
|                            |            | H | 1.0 | -5.4707330122 | -7.3120535471 | -1.5914985360 |
|                            |            | H | 1.0 | -5.5163533117 | -2.5039666025 | -1.8141765006 |
|                            |            | C | 6.0 | -7.2511788806 | -7.5677923262 | -0.3540030759 |
|                            |            | H | 1.0 | -4.7613749355 | -3.8550273234 | -2.6916930358 |
|                            |            | C | 6.0 | -6.1765979862 | -6.6965496928 | -1.0245057162 |
|                            |            | H | 1.0 | -4.2288501391 | -2.1869846626 | -2.9907743865 |
|                            |            | C | 6.0 | -4.5753302377 | -2.8847586768 | -2.2260455108 |

|   |     |               |               |               |
|---|-----|---------------|---------------|---------------|
| H | 1.0 | -2.9313225148 | -0.1274631496 | -3.3883695491 |
| O | 8.0 | -7.2289581099 | -9.4162813158 | 1.1850632859  |
| C | 6.0 | -6.7476778701 | -8.3505627155 | 0.8522960939  |
| H | 1.0 | -3.4830561971 | 1.3290715627  | -1.8038499566 |
| H | 1.0 | -6.0235921415 | -5.2827595770 | 0.6264658726  |
| C | 6.0 | -5.3736196473 | -5.9408920231 | 0.0261644984  |
| O | 8.0 | -4.3694180379 | -5.2124731724 | -0.5832142687 |
| H | 1.0 | -4.8367785617 | -3.5155306039 | 0.5240005052  |
| C | 6.0 | -3.5309711989 | -3.0151743930 | -1.1268906128 |
| H | 1.0 | -6.9624948204 | -6.1539005796 | 2.5537294024  |
| C | 6.0 | -1.9226111930 | -0.3018844741 | -3.0020171995 |
| H | 1.0 | -1.6796968830 | -1.3483883293 | -3.1921902607 |
| H | 1.0 | -1.2273221451 | 0.3389687798  | -3.5777909865 |
| H | 1.0 | -3.3266875464 | -2.0284865286 | -0.6919034900 |
| C | 6.0 | -3.9684793599 | -3.9535280023 | 0.0104417237  |
| C | 6.0 | -2.5009332326 | 1.2960381071  | -1.3223880687 |
| C | 6.0 | -5.6459998919 | -7.6981508901 | 1.6986750204  |
| O | 8.0 | -2.3263329010 | -3.4891096455 | -1.7544745494 |
| O | 8.0 | -4.7535799929 | -6.9130722138 | 0.8962671288  |
| H | 1.0 | -1.9005446439 | 2.1344148202  | -1.7220942532 |
| C | 6.0 | -6.2391341206 | -6.9086532372 | 2.8771238917  |
| H | 1.0 | -6.7482733829 | -7.5940811634 | 3.5598705311  |
| N | 7.0 | -1.9034430396 | -0.0182444562 | -1.5666197602 |
| H | 1.0 | -2.6539660668 | 1.4659383540  | -0.2557202470 |
| H | 1.0 | -5.0296637539 | -8.5109030358 | 2.0931361176  |
| H | 1.0 | -5.4331705963 | -6.3972718257 | 3.4098423260  |
| C | 6.0 | -2.8211951683 | -4.1413548763 | 1.0154672302  |
| H | 1.0 | -3.4587838178 | -5.8292929253 | 1.7378210586  |
| C | 6.0 | -1.2253431338 | -3.6624767893 | -0.8727386777 |
| H | 1.0 | -1.7707155861 | -5.6128210463 | -0.1588322136 |
| H | 1.0 | -2.6107252624 | -3.1574546952 | 1.4478673605  |
| H | 1.0 | 0.0189609343  | -1.9382187693 | -2.1254893465 |
| O | 8.0 | -3.1712698670 | -4.9753951911 | 2.1057924033  |
| H | 1.0 | -0.4400102317 | -4.0795733431 | -1.5152040945 |
| C | 6.0 | -0.5370200651 | -0.1380710252 | -1.0200711030 |
| C | 6.0 | -1.5735587528 | -4.6232316152 | 0.2674899038  |
| H | 1.0 | 0.1512858521  | 0.4776389778  | -1.6310230810 |
| O | 8.0 | -0.7954063355 | -2.4566935642 | -0.2856043016 |
| C | 6.0 | 0.0108321364  | -1.5822205864 | -1.0884073072 |
| H | 1.0 | -0.6918395023 | 1.3871920990  | 0.5493859300  |
| H | 1.0 | -1.0699647982 | -0.2689621261 | 1.0682248516  |
| C | 6.0 | -0.4161413170 | 0.3383040875  | 0.4347671212  |
| H | 1.0 | -0.7317095804 | -4.7012120184 | 0.9597891380  |
| C | 6.0 | 1.4660227090  | -1.5898969804 | -0.5727813854 |

|   |     |               |               |               |
|---|-----|---------------|---------------|---------------|
| H | 1.0 | 2.0491361530  | -0.9282126046 | -1.2301467861 |
| H | 1.0 | 2.1151436345  | -3.4090175806 | -1.5619319177 |
| C | 6.0 | 1.0221736382  | 0.2104736629  | 0.9421012448  |
| H | 1.0 | 2.6176616946  | 1.4597574330  | -1.4221630990 |
| H | 1.0 | -0.5585657092 | 10.0934051961 | 3.6946615716  |
| H | 1.0 | 1.5590863445  | -3.6345352110 | 0.1181623456  |
| O | 8.0 | -0.6344030584 | 7.5451381955  | 4.0380883151  |
| C | 6.0 | 2.1043114272  | -2.9711797293 | -0.5581478471 |
| C | 6.0 | 0.1388505346  | 9.5534453834  | 3.0617405786  |
| O | 8.0 | 1.7975552430  | 1.1821285830  | 0.2789289267  |
| H | 1.0 | 0.9320904717  | 11.3070015140 | 2.0926386460  |
| H | 1.0 | -0.4283207224 | 6.5683324521  | 3.9390750523  |
| C | 6.0 | 0.1836009283  | 8.1648086539  | 3.1640022019  |
| O | 8.0 | 3.4252248507  | 1.3729981767  | -1.9553043472 |
| O | 8.0 | 1.5383442102  | -1.1021104117 | 0.7719640633  |
| C | 6.0 | 0.9810287660  | 10.2223153025 | 2.1584367161  |
| H | 1.0 | 1.0625358640  | 0.3915131898  | 2.0209278319  |
| O | 8.0 | 0.3620738304  | 5.3419106425  | 3.2853631518  |
| C | 6.0 | 1.0888607454  | 7.4146434297  | 2.3474007985  |
| C | 6.0 | 1.8670590527  | 9.5219736290  | 1.3560501996  |
| C | 6.0 | 1.1369484247  | 5.9768503392  | 2.4506571874  |
| H | 1.0 | 2.5241622699  | 10.0218760610 | 0.6537134244  |
| C | 6.0 | 1.9352786255  | 8.1170610325  | 1.4362218136  |
| H | 1.0 | 0.7968818536  | 3.8439597924  | 3.0047129486  |
| H | 1.0 | 4.5870410883  | -0.7073861551 | -2.7857498694 |
| O | 8.0 | 1.3333070992  | 3.1406022252  | 2.5248989928  |
| C | 6.0 | 2.0584823231  | 5.2549093652  | 1.6124494609  |
| C | 6.0 | 2.8710101255  | 7.3919889045  | 0.5855479958  |
| C | 6.0 | 2.1318275566  | 3.8385442368  | 1.6798439821  |
| H | 1.0 | 3.1361116957  | -2.8978341108 | -0.2047044746 |
| C | 6.0 | 2.9077687990  | 5.9492091593  | 0.6958250922  |
| O | 8.0 | 3.6327263800  | 8.0143622417  | -0.2334159823 |
| H | 1.0 | 4.7665009011  | 3.4997631742  | -1.9590047438 |
| C | 6.0 | 3.0298435621  | 3.1318987672  | 0.8702510050  |
| C | 6.0 | 3.8050537660  | 5.2103076484  | -0.1223248229 |
| C | 6.0 | 3.0196014738  | 1.6308348649  | 0.9567121296  |
| C | 6.0 | 3.8592026630  | 3.8115544388  | -0.0447301319 |
| O | 8.0 | 4.6258488931  | 5.8471247100  | -0.9829456078 |
| C | 6.0 | 4.5462913659  | 1.5464046714  | -1.0788645812 |
| H | 1.0 | 4.3951007991  | 6.8320857597  | -0.8592415108 |
| C | 6.0 | 5.4643623979  | -0.6319160057 | -2.1395152163 |
| C | 6.0 | 4.8400886327  | 3.0825262666  | -0.9518261502 |
| H | 1.0 | 5.9739114457  | 1.3912981312  | -2.6753359302 |
| H | 1.0 | 2.9358949628  | 1.3220327744  | 2.0039616994  |



|                            |            |   |     |               |               |               |
|----------------------------|------------|---|-----|---------------|---------------|---------------|
|                            |            | H | 1.0 | 4.0887206611  | -0.1008804005 | 0.2811052456  |
|                            |            | C | 6.0 | 4.2484856286  | 0.9798355469  | 0.3196914951  |
|                            |            | C | 6.0 | 5.7281110809  | 0.8294835864  | -1.7662070765 |
|                            |            | H | 1.0 | 5.2899418486  | -1.2571610946 | -1.2573931627 |
|                            |            | H | 1.0 | 6.3249758924  | -1.0517997475 | -2.6721146418 |
|                            |            | H | 1.0 | 5.1124754015  | 1.1786439388  | 0.9629892998  |
|                            |            | H | 1.0 | 6.6053556756  | 0.8904207911  | -1.1120376180 |
|                            |            | C | 6.0 | 6.2662162309  | 3.3378055416  | -0.4706760489 |
|                            |            | O | 8.0 | 7.0573075603  | 3.7925915779  | -1.4732334049 |
|                            |            | O | 8.0 | 6.6879730198  | 3.1376838446  | 0.6514343348  |
|                            |            | H | 1.0 | 8.8929754922  | 4.4587164404  | -1.9963883530 |
|                            |            | C | 6.0 | 8.4047449139  | 4.0910131720  | -1.0930225607 |
|                            |            | H | 1.0 | 8.4231065813  | 4.8555235320  | -0.3121542961 |
|                            |            | H | 1.0 | 8.9145814359  | 3.1980437516  | -0.7192543549 |
| 11-Hydroxy aclacinomycin X | NSC 670122 | H | 1.0 | -7.4931213764 | -6.0651302272 | -2.4143617960 |
|                            |            | H | 1.0 | -7.7263123895 | -8.1855599990 | -1.0571351703 |
|                            |            | N | 7.0 | -6.8733415769 | -5.6913344126 | -1.7116070050 |
|                            |            | H | 1.0 | -6.2416799407 | -4.9563368251 | -1.9972662786 |
|                            |            | C | 6.0 | -6.9410168725 | -7.7482528328 | -0.4464391402 |
|                            |            | C | 6.0 | -6.4371867420 | -6.5121281146 | -0.7227208184 |
|                            |            | H | 1.0 | -5.6386434804 | -2.4483442582 | -1.7711646080 |
|                            |            | H | 1.0 | -4.7693421844 | -3.6540211194 | -2.7676916198 |
|                            |            | O | 8.0 | -6.9731673846 | -9.5869118005 | 1.0432515423  |
|                            |            | H | 1.0 | -4.3569507263 | -1.9416023662 | -2.8849572562 |
|                            |            | C | 6.0 | -4.6677420064 | -2.7277276632 | -2.1944803314 |
|                            |            | C | 6.0 | -6.4868386580 | -8.5136799790 | 0.6929075287  |
|                            |            | C | 6.0 | -5.3889318698 | -5.8884454864 | 0.1949523492  |
|                            |            | H | 1.0 | -5.9001029051 | -5.2938726462 | 0.9705233796  |
|                            |            | H | 1.0 | -2.9446780076 | -0.0419335310 | -3.4153043520 |
|                            |            | O | 8.0 | -4.5499590449 | -5.0702272305 | -0.5567632030 |
|                            |            | H | 1.0 | -6.6064572413 | -6.6412707127 | 2.7774741116  |
|                            |            | H | 1.0 | -4.9186175027 | -3.3690023742 | 0.5761687269  |
|                            |            | H | 1.0 | -3.4958209248 | 1.4121082188  | -1.8297630245 |
|                            |            | C | 6.0 | -3.6265002150 | -2.9048709198 | -1.0974308281 |
|                            |            | C | 6.0 | -5.3422291726 | -7.9169171624 | 1.5254129834  |
|                            |            | O | 8.0 | -4.6071247017 | -6.9098117368 | 0.7984873846  |
|                            |            | H | 1.0 | -6.2958859848 | -8.2586411010 | 3.4194447742  |
|                            |            | C | 6.0 | -4.0778454212 | -3.8351519489 | 0.0418202042  |
|                            |            | C | 6.0 | -5.8440692422 | -7.4194925344 | 2.8848273980  |
|                            |            | C | 6.0 | -1.9456352384 | -0.2404220256 | -3.0154399676 |
|                            |            | H | 1.0 | -1.7227808787 | -1.2914770795 | -3.2055793868 |
|                            |            | H | 1.0 | -3.3952256541 | -1.9274750819 | -0.6549493146 |
|                            |            | O | 8.0 | -2.4439112301 | -3.4014647604 | -1.7442893369 |

|   |     |               |               |               |
|---|-----|---------------|---------------|---------------|
| H | 1.0 | -1.2292558912 | 0.3865080073  | -3.5801843804 |
| H | 1.0 | -4.6151416697 | -8.7188968587 | 1.6806159859  |
| C | 6.0 | -2.5191467538 | 1.3628638106  | -1.3387472040 |
| N | 7.0 | -1.9392635169 | 0.0392232865  | -1.5787465014 |
| H | 1.0 | -1.9013993357 | 2.1917971841  | -1.7309968319 |
| H | 1.0 | -5.0187943747 | -7.0148127280 | 3.4764377379  |
| H | 1.0 | -2.6794070693 | 1.5337346003  | -0.2733494797 |
| H | 1.0 | -3.4697199145 | -5.7698104628 | 1.7630260256  |
| C | 6.0 | -2.9149416861 | -4.0617364921 | 1.0228010890  |
| H | 1.0 | -1.9182503766 | -5.5495321873 | -0.1803879705 |
| C | 6.0 | -1.3328949508 | -3.6048318030 | -0.8783049186 |
| O | 8.0 | -3.2670775773 | -4.8864655764 | 2.1184831591  |
| H | 1.0 | -0.5653318285 | -4.0315615497 | -1.5356082593 |
| H | 1.0 | -2.6751014604 | -3.0831205029 | 1.4521078434  |
| C | 6.0 | -1.6913555513 | -4.5699317231 | 0.2541862152  |
| H | 1.0 | -0.0403642195 | -1.9082252096 | -2.1208256396 |
| C | 6.0 | -0.5791042287 | -0.0994867212 | -1.0195208623 |
| O | 8.0 | -0.8749890683 | -2.4146487928 | -0.2862924957 |
| H | 1.0 | 0.1226929624  | 0.5072173656  | -1.6237430954 |
| C | 6.0 | -0.0507204281 | -1.5508783738 | -1.0842068215 |
| H | 1.0 | -1.1306561518 | -0.2222873416 | 1.0658811829  |
| H | 1.0 | -0.8439733339 | -4.6763950528 | 0.9358676920  |
| H | 1.0 | -0.7233364944 | 1.4275958614  | 0.5492156087  |
| C | 6.0 | -0.4634288092 | 0.3744956172  | 0.4364516440  |
| H | 1.0 | 2.0278816219  | -3.4077027360 | -1.5441080226 |
| C | 6.0 | 1.3993787424  | -1.5810082907 | -0.5560591993 |
| H | 1.0 | 1.9978213583  | -0.9272292998 | -1.2074225453 |
| H | 1.0 | 1.4546960990  | -3.6285452777 | 0.1308293982  |
| C | 6.0 | 2.0156839532  | -2.9721139684 | -0.5393064288 |
| C | 6.0 | 0.9694568868  | 0.2252175631  | 0.9542478440  |
| H | 1.0 | 2.6162658892  | 1.4494433897  | -1.4002626849 |
| O | 8.0 | 1.4654579143  | -1.0963738223 | 0.7896428439  |
| O | 8.0 | 1.7641112556  | 1.1825354491  | 0.2952109590  |
| O | 8.0 | 3.4299175181  | 1.3341711277  | -1.9180536386 |
| H | 1.0 | 1.0042472353  | 0.4066070188  | 2.0332283400  |
| H | 1.0 | 4.5730884445  | -0.7740048893 | -2.7092055471 |
| H | 1.0 | 3.0456268830  | -2.9157604793 | -0.1777295045 |
| O | 8.0 | -0.6467788315 | 7.6130177069  | 3.9429519200  |
| H | 1.0 | -0.4520651683 | 6.6326298025  | 3.8571328548  |
| H | 1.0 | -0.5313098316 | 10.1565046149 | 3.5768184721  |
| O | 8.0 | 0.3336660207  | 5.3900019820  | 3.2287161771  |
| C | 6.0 | 0.1941343322  | 8.2132776270  | 3.0771797338  |
| H | 1.0 | 0.7533935800  | 3.8830122388  | 2.9711314557  |
| C | 6.0 | 0.1694049731  | 9.6014048270  | 2.9608891440  |

|                         |            |   |     |              |               |               |
|-------------------------|------------|---|-----|--------------|---------------|---------------|
|                         |            | O | 8.0 | 1.2884018637 | 3.1685955884  | 2.5062497863  |
|                         |            | C | 6.0 | 1.1308940559 | 6.0064014690  | 2.4013255117  |
|                         |            | C | 6.0 | 1.1031175817 | 7.4437525954  | 2.2833358881  |
|                         |            | C | 6.0 | 1.0350461975 | 10.2502447601 | 2.0654459069  |
|                         |            | H | 1.0 | 1.0015906279 | 11.3347411601 | 1.9883074769  |
|                         |            | C | 6.0 | 2.1107357037 | 3.8481448819  | 1.6689478126  |
|                         |            | C | 6.0 | 2.0568723544 | 5.2644993850  | 1.5863840784  |
|                         |            | C | 6.0 | 1.9735404656 | 8.1259546273  | 1.3795793948  |
|                         |            | C | 6.0 | 2.9829893711 | 1.6223975936  | 0.9849025911  |
|                         |            | C | 6.0 | 1.9249707100 | 9.5305530123  | 1.2845251004  |
|                         |            | H | 1.0 | 4.8087300923 | 3.4413493516  | -1.9178608166 |
|                         |            | C | 6.0 | 3.0135744929 | 3.1219601383  | 0.8823764575  |
|                         |            | C | 6.0 | 4.5401964283 | 1.4981885366  | -1.0259424063 |
|                         |            | C | 6.0 | 5.4422819154 | -0.7036878698 | -2.0514359963 |
|                         |            | C | 6.0 | 2.9304075254 | 5.9385545848  | 0.6770494422  |
|                         |            | H | 1.0 | 2.5999444520 | 10.0152277145 | 0.5884746630  |
|                         |            | C | 6.0 | 2.9140437150 | 7.3801808800  | 0.5518488849  |
|                         |            | H | 1.0 | 4.0376916147 | -0.1301835009 | 0.3393926909  |
|                         |            | C | 6.0 | 3.8668448846 | 3.7814715409  | -0.0256917036 |
|                         |            | C | 6.0 | 3.8318679046 | 5.1798630245  | -0.1180607466 |
|                         |            | O | 8.0 | 3.6970777021 | 7.9848164663  | -0.2603626029 |
|                         |            | H | 1.0 | 5.9876756112 | 1.3069551612  | -2.5998185255 |
|                         |            | H | 1.0 | 5.2472312691 | -1.3175912199 | -1.1656924523 |
|                         |            | H | 1.0 | 2.8801478481 | 1.3253777264  | 2.0339051477  |
|                         |            | H | 1.0 | 6.3043225562 | -1.1405758892 | -2.5677084825 |
|                         |            | O | 8.0 | 4.6750069354 | 5.7977601413  | -0.9709035309 |
|                         |            | C | 6.0 | 4.2119691350 | 0.9484781701  | 0.3726593203  |
|                         |            | C | 6.0 | 4.8551825280 | 3.0308222725  | -0.9063224792 |
|                         |            | C | 6.0 | 5.7209636391 | 0.7577152646  | -1.6889424412 |
|                         |            | H | 1.0 | 4.4543557166 | 6.7866641713  | -0.8600490361 |
|                         |            | H | 1.0 | 5.0680070077 | 1.1402962763  | 1.0284519022  |
|                         |            | H | 1.0 | 6.5894788719 | 0.8128785363  | -1.0227992784 |
|                         |            | C | 6.0 | 6.2751576154 | 3.2672987620  | -0.3982043786 |
|                         |            | O | 8.0 | 7.0930574086 | 3.7019937754  | -1.3880295629 |
|                         |            | O | 8.0 | 6.6711311318 | 3.0693110017  | 0.7336325166  |
|                         |            | H | 1.0 | 8.9496644942 | 4.3331449776  | -1.8798487853 |
|                         |            | C | 6.0 | 8.4382402901 | 3.9787310902  | -0.9840497325 |
|                         |            | H | 1.0 | 8.9251889786 | 3.0788387066  | -0.5966023176 |
|                         |            | H | 1.0 | 8.4556845003 | 4.7467043380  | -0.2065823957 |
| 3'-Hydroxy daunorubicin | 64842-75-7 | O | 8.0 | 5.4537819555 | -0.5718944611 | -2.4173968244 |
|                         |            | H | 1.0 | 0.3210545717 | 3.1610979786  | -3.5581392654 |
|                         |            | H | 1.0 | 2.2434407710 | 0.2290388340  | -3.5297957521 |
|                         |            | O | 8.0 | 0.9920619408 | 2.4112963745  | -3.4179478125 |

|   |     |               |               |               |
|---|-----|---------------|---------------|---------------|
| O | 8.0 | -0.8367366051 | 4.1034187519  | -3.1328127636 |
| H | 1.0 | 5.5956137719  | -2.4648959254 | -4.0761096763 |
| C | 6.0 | 4.4944800108  | -1.2800689278 | -2.6742533997 |
| O | 8.0 | 2.2662179334  | -2.0956354354 | -2.3761504184 |
| H | 1.0 | -2.5834945783 | 5.6468195496  | -2.6817444640 |
| C | 6.0 | 2.5950768157  | 0.3397685792  | -2.4989026233 |
| H | 1.0 | 3.8413313498  | -2.3125493969 | -4.4453635478 |
| C | 6.0 | 4.5894967736  | -2.4294622768 | -3.6550309402 |
| H | 1.0 | 3.4338616800  | 1.0477676215  | -2.5349371100 |
| C | 6.0 | 0.7336295452  | 1.9761059457  | -2.1643449383 |
| C | 6.0 | 3.1313848306  | -1.0237336201 | -2.0049166099 |
| H | 1.0 | 1.6131861235  | -2.1972543690 | -1.6616703303 |
| C | 6.0 | -1.0496833049 | 3.6802026033  | -1.9409136027 |
| C | 6.0 | -2.8249370221 | 5.3505699895  | -1.6675080179 |
| C | 6.0 | 1.4890543461  | 0.9187431390  | -1.6443298188 |
| H | 1.0 | -4.3880607212 | 6.7863340698  | -1.3668440522 |
| C | 6.0 | -0.2834659908 | 2.5917821059  | -1.3831997967 |
| H | 1.0 | -0.4405241248 | -5.3059431850 | -1.4149663017 |
| H | 1.0 | 4.3434280068  | -3.3688798263 | -3.1512722247 |
| C | 6.0 | -2.0790198103 | 4.2883250587  | -1.1085540344 |
| C | 6.0 | -3.8132039366 | 5.9691790699  | -0.9372954663 |
| C | 6.0 | 3.3204721437  | -0.9709722442 | -0.4757511590 |
| C | 6.0 | 1.2370489837  | 0.4648498123  | -0.3320642915 |
| H | 1.0 | 3.7524660993  | -1.9156822008 | -0.1235431359 |
| C | 6.0 | -1.0215342600 | -5.2613296584 | -0.4903671242 |
| C | 6.0 | -0.5347495142 | 2.1359392297  | -0.0570705212 |
| H | 1.0 | 4.0391227166  | -0.1802072588 | -0.2403315183 |
| O | 8.0 | 1.1231599583  | -1.8732433909 | 0.1410863962  |
| H | 1.0 | -2.0852590783 | -5.2257311112 | -0.7460220138 |
| H | 1.0 | -0.8641173925 | -3.1217490397 | -0.2655221236 |
| O | 8.0 | 0.7938790847  | -4.0974809483 | 0.5277054529  |
| C | 6.0 | -2.3370670372 | 3.8373316260  | 0.2276600600  |
| C | 6.0 | 1.9982488382  | -0.6938408352 | 0.2467238239  |
| H | 1.0 | -0.8391259556 | -6.1707715158 | 0.0880927581  |
| C | 6.0 | -4.0938968997 | 5.5504034249  | 0.3791349037  |
| H | 1.0 | 2.4071719642  | -3.1156207344 | 1.1933091415  |
| C | 6.0 | 0.2389423902  | 1.0590425883  | 0.4552028315  |
| C | 6.0 | -0.6359744488 | -4.0266419291 | 0.3086990393  |
| C | 6.0 | -1.5547029640 | 2.7391622563  | 0.7875562480  |
| C | 6.0 | 1.3329223961  | -2.9104528295 | 1.0849174862  |
| H | 1.0 | -4.8762566672 | 6.0501488850  | 0.9365006057  |
| C | 6.0 | -3.3755551399 | 4.5079766052  | 0.9557690926  |
| H | 1.0 | 2.1788315927  | -0.5115086100 | 1.3109756921  |
| O | 8.0 | 0.0254047923  | 0.5966764295  | 1.7061113669  |

|            |            |                                                 |
|------------|------------|-------------------------------------------------|
|            |            | H 1.0 -0.7272349984 1.2137366308 2.0561124689   |
|            |            | O 8.0 -1.7299464620 2.2962117835 1.9747979892   |
|            |            | O 8.0 -3.6229320015 4.0783530242 2.2280470044   |
|            |            | H 1.0 -0.0737595822 -5.2833618664 2.2926645064  |
|            |            | H 1.0 -5.6257597791 4.6118824537 2.4953589059   |
|            |            | C 6.0 -1.3087410916 -3.9300525777 1.6809672170  |
|            |            | C 6.0 0.7027232994 -2.6041147662 2.4516940260   |
|            |            | H 1.0 -1.2176674351 -1.7772891656 1.9332776496  |
|            |            | H 1.0 -2.3992928843 -3.9074373388 1.5802192557  |
|            |            | H 1.0 1.0043839594 -1.6158263294 2.8051272063   |
|            |            | C 6.0 -4.6392043616 4.7130054046 2.9705366873   |
|            |            | O 8.0 -1.0087641354 -5.0947901039 2.4713566934  |
|            |            | H 1.0 1.0827416021 -3.3444700181 3.1684213059   |
|            |            | C 6.0 -0.8355786093 -2.6734978055 2.4303166970  |
|            |            | H 1.0 -4.4348865509 5.7825211064 3.1246802609   |
|            |            | H 1.0 -4.6572763056 4.2101385214 3.9398039523   |
|            |            | O 8.0 -1.3660562794 -2.6779588624 3.7491749528  |
|            |            | H 1.0 -1.2724275904 -3.5987266900 4.0418308314  |
|            |            | H 1.0 -3.0532741480 -2.3250588243 -2.6107648984 |
|            |            | H 1.0 -4.5134995272 -1.6159210038 -2.3522369279 |
|            |            | N 7.0 -3.6052916888 -1.8026096738 -1.9358394612 |
|            |            | H 1.0 -4.2099000111 -3.6017031712 -0.9355470180 |
|            |            | C 6.0 -3.7963450874 -2.5986372077 -0.7199282750 |
|            |            | H 1.0 -1.6892954055 -3.1342928623 -0.6753166057 |
|            |            | O 8.0 -5.9929186364 -1.6596623582 -0.5459264740 |
|            |            | H 1.0 -3.5846768078 0.4318911839 -0.8859127672  |
|            |            | C 6.0 -2.4582280388 -2.7733134747 0.0173296891  |
|            |            | H 1.0 -6.5561430094 -1.0707736802 -0.0275598239 |
|            |            | H 1.0 -5.1431948787 0.9678151460 -0.2506543230  |
|            |            | C 6.0 -4.8049829177 -1.9070047243 0.2129576565  |
|            |            | H 1.0 -1.7857985987 -0.7064155370 -0.0953641784 |
|            |            | C 6.0 -4.1432968311 0.6180657892 0.0308704066   |
|            |            | H 1.0 -2.5604524970 -3.5175798070 0.8153223304  |
|            |            | H 1.0 1.4751853012 -2.6906203007 0.6126645134   |
|            |            | H 1.0 -5.0208075397 -2.6254370981 1.0205787781  |
|            |            | C 6.0 -1.9971751210 -1.4706668126 0.6620257383  |
|            |            | H 1.0 3.1797259345 -2.1850362180 0.7186210202   |
|            |            | C 6.0 -4.2475231982 -0.6375531690 0.9037169962  |
|            |            | H 1.0 -3.6403103548 1.4047931125 0.5982765433   |
|            |            | H 1.0 2.2450023466 -3.8303413182 2.4477464591   |
|            |            | C 6.0 2.1546845629 -1.9089112732 0.9765074638   |
|            |            | O 8.0 4.0759319650 1.0524073516 -2.8368188898   |
|            |            | O 8.0 3.6629109732 -0.7732316327 -1.1633161114  |
| Idarubicin | 57852-57-0 |                                                 |

|                      |            |   |     |               |               |               |
|----------------------|------------|---|-----|---------------|---------------|---------------|
|                      |            | H | 1.0 | 4.0498383132  | -0.1887787227 | -1.8960710519 |
|                      |            | O | 8.0 | -0.8740808974 | -1.7368468346 | 1.4353486701  |
|                      |            | C | 6.0 | 2.5804160018  | -0.0890850279 | -0.7336175884 |
|                      |            | O | 8.0 | -3.0245234781 | -0.9886860818 | 1.5494557212  |
|                      |            | C | 6.0 | 1.8051231642  | -0.6032496667 | 0.3079678929  |
|                      |            | C | 6.0 | 3.0342905048  | 1.6708803513  | -2.4199434067 |
|                      |            | H | 1.0 | -4.9244616568 | -0.4066911224 | 1.7410263846  |
|                      |            | C | 6.0 | 2.2165214184  | 1.1459021373  | -1.3468835477 |
|                      |            | O | 8.0 | 1.7159025975  | -3.2323799392 | 2.9936968709  |
|                      |            | H | 1.0 | 4.2737792915  | 2.9411259111  | -4.3888743464 |
|                      |            | C | 6.0 | 2.6319884515  | 2.9378706868  | -3.0158983248 |
|                      |            | C | 6.0 | 0.6433670444  | 0.0737776977  | 0.7376346837  |
|                      |            | C | 6.0 | 3.3980377298  | 3.4939750412  | -4.0645299897 |
|                      |            | C | 6.0 | 1.0538003397  | 1.8455865949  | -0.8928739270 |
|                      |            | C | 6.0 | 1.9804333305  | -1.8953083502 | 2.5124804648  |
|                      |            | C | 6.0 | 0.6524222167  | 3.1030565124  | -1.4838187115 |
|                      |            | C | 6.0 | 0.2679718114  | 1.2896722459  | 0.1586357456  |
|                      |            | C | 6.0 | 1.4745340780  | 3.6345078321  | -2.5612023981 |
|                      |            | O | 8.0 | -0.3891716637 | 3.7333840352  | -1.0794956286 |
|                      |            | C | 6.0 | -0.1430712957 | -0.5493060459 | 1.8625155097  |
|                      |            | C | 6.0 | 3.0393347042  | 4.6946384588  | -4.6476063947 |
|                      |            | H | 1.0 | 3.6393251596  | 5.1105829312  | -5.4539077929 |
|                      |            | C | 6.0 | 1.1265717941  | 4.8597941777  | -3.1721335277 |
|                      |            | C | 6.0 | 1.8911358189  | 5.3851505274  | -4.1966975343 |
|                      |            | O | 8.0 | 4.1800638522  | -0.8688377217 | 2.6410746417  |
|                      |            | O | 8.0 | -0.8363607033 | 1.9380140599  | 0.5966096496  |
|                      |            | H | 1.0 | 0.2399582891  | 5.3659891459  | -2.8041314315 |
|                      |            | C | 6.0 | 0.7915803920  | -1.0097112178 | 2.9825561323  |
|                      |            | C | 6.0 | 3.2648289777  | -1.4109438553 | 3.2283257864  |
|                      |            | H | 1.0 | -0.8714442148 | 2.7770541622  | 0.0171661365  |
|                      |            | H | 1.0 | 0.2268108709  | -1.5778102045 | 3.7280000769  |
|                      |            | H | 1.0 | 1.6114074622  | 6.3298390027  | -4.6575699266 |
|                      |            | H | 1.0 | -0.8644679741 | 0.1686784002  | 2.2596838829  |
|                      |            | H | 1.0 | 3.4743426043  | -2.7531820850 | 4.8942391776  |
|                      |            | H | 1.0 | 1.1698678732  | -0.1021723066 | 3.4675920828  |
|                      |            | C | 6.0 | 3.3405073781  | -1.6804412902 | 4.7265674979  |
|                      |            | H | 1.0 | 4.1843214519  | -1.1317057665 | 5.1481880436  |
|                      |            | H | 1.0 | 2.4126935224  | -1.4003399702 | 5.2339542677  |
| 5-Imino daunorubicin | 67324-99-6 | H | 1.0 | 3.5162269263  | 1.3991395343  | -7.0478656548 |
|                      |            | H | 1.0 | 1.3780148533  | 2.3029472810  | -6.1006239950 |
|                      |            | C | 6.0 | 3.1569596654  | 1.0854215084  | -6.0708392062 |
|                      |            | H | 1.0 | 4.8350811579  | -0.2304251763 | -5.7389326006 |
|                      |            | C | 6.0 | 1.9844338564  | 1.5856604964  | -5.5597363937 |

|   |     |               |               |               |
|---|-----|---------------|---------------|---------------|
| C | 6.0 | 3.9111694312  | 0.1536566488  | -5.3251464036 |
| H | 1.0 | 5.2368032069  | -2.2284709630 | -4.7979591204 |
| O | 8.0 | -0.3757338952 | 2.5937723266  | -4.5566100400 |
| C | 6.0 | 1.5156377556  | 1.1799951306  | -4.2874101414 |
| C | 6.0 | 3.4694030940  | -0.2597273265 | -4.0767155242 |
| H | 1.0 | 6.1403903943  | -0.8895826966 | -4.0369878472 |
| C | 6.0 | 5.4011565590  | -1.6822176387 | -3.8594086773 |
| C | 6.0 | 0.2706195019  | 1.7596486350  | -3.8219597250 |
| H | 1.0 | -1.5706123659 | 2.8895349984  | -3.6502785934 |
| C | 6.0 | 2.2524176240  | 0.2316920825  | -3.4999139162 |
| O | 8.0 | 4.1962863442  | -1.1687994327 | -3.3320248885 |
| H | 1.0 | 5.7898370552  | -2.3719501054 | -3.1070315991 |
| O | 8.0 | -2.1315136753 | 2.8062327726  | -2.8031043602 |
| C | 6.0 | -0.2139557942 | 1.3730597544  | -2.5170890477 |
| C | 6.0 | 1.7390909293  | -0.1762540837 | -2.1916672163 |
| H | 1.0 | -4.0351536288 | 0.2471358857  | -2.2579704071 |
| C | 6.0 | -1.4317838810 | 1.9313378964  | -2.0406612875 |
| C | 6.0 | 0.4967403310  | 0.4308164248  | -1.7193427787 |
| N | 7.0 | 2.3024556270  | -1.0637504093 | -1.3781008592 |
| H | 1.0 | -5.3206274720 | -0.9611771551 | -1.9522841011 |
| H | 1.0 | 3.1606597602  | -1.4571829599 | -1.7363443839 |
| H | 1.0 | -5.6269096942 | 0.7916524750  | -1.7343015242 |
| C | 6.0 | -4.8913416505 | -0.0122873093 | -1.6269407559 |
| H | 1.0 | -3.8473206452 | 2.4308827982  | -1.2108813804 |
| C | 6.0 | -1.9277180013 | 1.5797927317  | -0.7812758583 |
| C | 6.0 | -0.0300147723 | 0.0714949947  | -0.4384955037 |
| C | 6.0 | -3.2545340206 | 2.1527458486  | -0.3372569127 |
| H | 1.0 | 1.4579477305  | -1.1231174025 | -0.2667731579 |
| C | 6.0 | -1.2233915352 | 0.6637389096  | 0.0280844001  |
| C | 6.0 | -4.4642742205 | -0.1254552540 | -0.1801031064 |
| H | 1.0 | -3.1245692389 | 3.0754146603  | 0.2454719648  |
| O | 8.0 | 0.5921882439  | -0.8375950745 | 0.3257497664  |
| C | 6.0 | -3.9962022580 | 1.1604547201  | 0.5503460894  |
| O | 8.0 | -4.5853889191 | -1.1672849232 | 0.4447389203  |
| O | 8.0 | -5.2278695696 | 1.7944341777  | 0.9648430870  |
| H | 1.0 | -1.8064256830 | -0.8552022894 | 1.3890838744  |
| C | 6.0 | -1.7437483136 | 0.2389312708  | 1.3878441735  |
| H | 1.0 | -5.6292041478 | 1.2039268218  | 1.6190677610  |
| C | 6.0 | -3.1205926355 | 0.8345168367  | 1.7576618024  |
| H | 1.0 | -2.9542016889 | 1.7759789187  | 2.2919645541  |
| O | 8.0 | -0.7714674278 | 0.6492869954  | 2.3729589623  |
| H | 1.0 | 0.3180742342  | -2.0621664020 | 2.2962719440  |
| H | 1.0 | -3.6526856204 | 0.1482195073  | 2.4262949755  |
| H | 1.0 | 1.4775272091  | 0.1301531884  | 2.6530757725  |

|               |            |                                                 |
|---------------|------------|-------------------------------------------------|
|               |            | H 1.0 -1.9048028888 -1.7372914661 3.2775715351  |
|               |            | C 6.0 0.2188161419 -2.1564806047 3.3823349083   |
|               |            | H 1.0 0.7551051680 -4.1189381537 3.2333711563   |
|               |            | C 6.0 -0.8591193756 0.1483763573 3.6888252490   |
|               |            | H 1.0 2.3749047085 -2.0164730670 3.6403143064   |
|               |            | N 7.0 0.0446680640 -3.5758589421 3.7218914192   |
|               |            | C 6.0 -1.0296553265 -1.3743652072 3.8224715786  |
|               |            | C 6.0 1.5185934635 -0.0207485445 3.7362446615   |
|               |            | H 1.0 -1.6635983952 0.6604184199 4.2406033969   |
|               |            | C 6.0 1.4739125029 -1.5254896533 4.0301857574   |
|               |            | O 8.0 0.3345388082 0.5612661121 4.3401063754    |
|               |            | H 1.0 2.6326570755 1.7750775799 4.1588749833    |
|               |            | H 1.0 3.6400705337 0.3424857556 3.8628884759    |
|               |            | C 6.0 2.7174985060 0.6991070736 4.3325520371    |
|               |            | H 1.0 0.2622916954 -3.6713664417 4.7146163355   |
|               |            | H 1.0 -1.2265742570 -1.5777562832 4.8839091019  |
|               |            | O 8.0 1.4783955504 -1.7548103797 5.4491462046   |
|               |            | H 1.0 2.7892348180 0.5173105212 5.4087750347    |
|               |            | H 1.0 0.9045290738 -1.0581490452 5.8055875597   |
| Marcellomycin | 63710-10-1 | H 1.0 -3.5798127508 -2.7389638094 3.3939182702  |
|               |            | H 1.0 -1.8748050815 -3.2338977143 3.4249145850  |
|               |            | C 6.0 -2.7969420880 -3.2645947574 2.8388618183  |
|               |            | H 1.0 -3.0926092578 -4.2973137155 2.6493432323  |
|               |            | O 8.0 -2.0565545199 -0.7581546991 2.6055707731  |
|               |            | H 1.0 -2.8886217522 1.3186386867 1.5255925900   |
|               |            | O 8.0 -2.5961312717 -2.6748384199 1.5506353375  |
|               |            | C 6.0 -2.1907857012 -1.3800130962 1.5696042178  |
|               |            | H 1.0 -4.6118036661 -0.5961928562 1.1234576172  |
|               |            | H 1.0 -1.3421857851 2.9461967049 0.7445570495   |
|               |            | H 1.0 -3.7201580174 2.1863656412 0.2176003004   |
|               |            | C 6.0 -2.9058682955 1.4916376391 0.4455560203   |
|               |            | H 1.0 -5.7931202017 1.3048065724 -0.0120663651  |
|               |            | H 1.0 -6.6275271825 -0.2115174773 -0.3598200462 |
|               |            | C 6.0 -1.5941815059 2.1530297855 0.0283243952   |
|               |            | C 6.0 -4.5050641448 -0.4684677883 0.0393977126  |
|               |            | C 6.0 -5.6889627326 0.3340897881 -0.5084313772  |
|               |            | O 8.0 0.9248703582 3.0736652417 -0.5012136265   |
|               |            | H 1.0 1.9083730765 3.2373090173 -0.6573187969   |
|               |            | C 6.0 -0.4327199935 1.1871723144 -0.0572345067  |
|               |            | C 6.0 -1.9791663339 -0.8386457912 0.1607855788  |
|               |            | C 6.0 -3.1229246388 0.1479727525 -0.2672647430  |
|               |            | C 6.0 0.8321011465 1.7253077944 -0.3097468666   |
|               |            | C 6.0 -0.6033183356 -0.2075904192 0.0330542401  |



|           |            |   |     |               |               |               |
|-----------|------------|---|-----|---------------|---------------|---------------|
|           |            | O | 8.0 | 3.4086615507  | 2.7596617653  | -0.7993845797 |
|           |            | H | 1.0 | 1.2778218991  | -2.7636458729 | 0.0020700969  |
|           |            | H | 1.0 | -4.5210790208 | -1.4741709579 | -0.3979094593 |
|           |            | C | 6.0 | 1.9776645936  | 0.8972025442  | -0.3977722390 |
|           |            | C | 6.0 | 0.5164354997  | -1.0494569720 | -0.0369026843 |
|           |            | C | 6.0 | 3.2740442913  | 1.4705717377  | -0.6462626322 |
|           |            | C | 6.0 | 1.8169359700  | -0.5146291412 | -0.2448716941 |
|           |            | O | 8.0 | 0.3394671070  | -2.3802353454 | 0.0916706406  |
|           |            | O | 8.0 | -1.8220886798 | 2.7793521454  | -1.2637455842 |
|           |            | H | 1.0 | -5.5549835645 | 0.5152447109  | -1.5773354404 |
|           |            | H | 1.0 | -2.0307921348 | -1.6930117961 | -0.5184596347 |
|           |            | H | 1.0 | 4.9930614899  | 2.8555758240  | -1.0276004434 |
|           |            | O | 8.0 | 2.8110161141  | -2.6733310689 | -0.1957398167 |
|           |            | H | 1.0 | -0.9564657930 | 3.1481547771  | -1.5075673681 |
|           |            | C | 6.0 | 2.9524744582  | -1.4084832637 | -0.3241357866 |
|           |            | C | 6.0 | 4.4138677111  | 0.5915877744  | -0.7195762462 |
|           |            | H | 1.0 | -2.5527586574 | 1.1185580527  | -1.8720859705 |
|           |            | O | 8.0 | -3.0575422574 | 0.3061436609  | -1.6852833532 |
|           |            | O | 8.0 | 5.9067653467  | 2.4516788163  | -1.1139241416 |
|           |            | C | 6.0 | 4.2662576641  | -0.8208845356 | -0.5608818021 |
|           |            | C | 6.0 | 5.7206491679  | 1.1255141233  | -0.9562150315 |
|           |            | C | 6.0 | 5.3978438080  | -1.6564679479 | -0.6378473946 |
|           |            | H | 1.0 | 5.2488931344  | -2.7230233829 | -0.5139030601 |
|           |            | C | 6.0 | 6.8202751015  | 0.2734634075  | -1.0258000768 |
|           |            | C | 6.0 | 6.6511382248  | -1.1119541527 | -0.8658550514 |
|           |            | H | 1.0 | 7.7982759531  | 0.7090922468  | -1.2055980803 |
|           |            | H | 1.0 | 7.5216965220  | -1.7615983239 | -0.9236447805 |
| Menogaril | 71628-96-1 | H | 1.0 | 7.4598779898  | 0.6023520980  | -0.4179872041 |
|           |            | H | 1.0 | 6.6351098929  | 2.1510605594  | -0.1781070352 |
|           |            | H | 1.0 | 4.3154677539  | 4.8240583789  | 2.7218577179  |
|           |            | H | 1.0 | 5.3444299661  | 2.8634793014  | 1.6171391456  |
|           |            | C | 6.0 | 6.4792214932  | 1.0882313636  | -0.3524391736 |
|           |            | H | 1.0 | 3.6411658800  | 5.1874209974  | 1.1228749959  |
|           |            | H | 1.0 | 6.7495327193  | -1.3495303196 | 0.4373550154  |
|           |            | C | 6.0 | 3.4479181007  | 4.6821509974  | 2.0701387750  |
|           |            | O | 8.0 | 4.5350525017  | 3.1569535448  | -0.2126109532 |
|           |            | N | 7.0 | 5.7408583555  | 0.4578294713  | 0.7415564803  |
|           |            | H | 1.0 | 5.9859249319  | 0.9838656009  | -1.3371584656 |
|           |            | C | 6.0 | 4.4356852340  | 2.5656723619  | 1.0810168464  |
|           |            | H | 1.0 | 2.5723576451  | 5.1271571324  | 2.5491311742  |
|           |            | C | 6.0 | 5.7166861721  | -0.9884294163 | 0.5045799929  |
|           |            | H | 1.0 | 4.7518222647  | 0.2711614202  | 2.9878966819  |
|           |            | H | 1.0 | 3.7048124789  | 2.9583108107  | -0.6747272806 |

|   |     |               |               |               |
|---|-----|---------------|---------------|---------------|
| C | 6.0 | 3.2283952897  | 3.1876263804  | 1.8497925273  |
| C | 6.0 | 4.3920509031  | 1.0128061731  | 1.0185312756  |
| H | 1.0 | 5.2043743008  | -1.5122122495 | 1.3082832450  |
| O | 8.0 | 3.2176775569  | 2.6093248266  | 3.1706520207  |
| H | 1.0 | 5.2035291096  | -1.2553559397 | -0.4400068066 |
| C | 6.0 | 3.8638209470  | 0.3790097959  | 2.3518915222  |
| H | 1.0 | 1.9513272754  | 4.5341040579  | -0.2798339217 |
| H | 1.0 | 3.6790348067  | 0.7375543782  | 0.2181365755  |
| C | 6.0 | 2.8655659483  | 1.2521300401  | 3.1374774727  |
| H | 1.0 | 2.8289480527  | 0.9118300014  | 4.1749308984  |
| C | 6.0 | 1.9363059621  | 2.8558541865  | 1.1117205741  |
| C | 6.0 | 1.4804697128  | 3.5985456132  | 0.0006878179  |
| O | 8.0 | 3.3054714948  | -0.9103820727 | 2.1979681932  |
| O | 8.0 | 1.5559153145  | 1.0502160643  | 2.6443446945  |
| H | 1.0 | 2.3452569858  | -0.8411423363 | 1.9882578318  |
| C | 6.0 | 1.2610185774  | 1.6897377793  | 1.4629935317  |
| C | 6.0 | 0.3614556394  | 3.1914473443  | -0.7210928759 |
| O | 8.0 | -0.0907275052 | 3.9807052664  | -1.7166493166 |
| C | 6.0 | 0.2417030793  | 1.1402603296  | 0.6501188649  |
| H | 1.0 | -0.8711661092 | 3.4866316493  | -2.1066292056 |
| C | 6.0 | -0.2644570640 | 1.9398620831  | -0.4264012093 |
| O | 8.0 | 0.4250683979  | -1.0865928617 | 1.5229143386  |
| C | 6.0 | -0.1920615231 | -0.2511294882 | 0.8131069064  |
| C | 6.0 | -1.3772250282 | 1.4885906997  | -1.2200909808 |
| O | 8.0 | -1.8627316557 | 2.2343709458  | -2.1745828005 |
| C | 6.0 | -1.3748403553 | -0.6612211881 | 0.0418664896  |
| C | 6.0 | -1.9476438458 | 0.1955124208  | -0.9382076491 |
| H | 1.0 | -3.0512589989 | 1.3419820646  | -2.6490553012 |
| H | 1.0 | -1.4216349718 | -2.5854773774 | 0.9614739295  |
| C | 6.0 | -1.9152538496 | -1.9415062804 | 0.2407272996  |
| C | 6.0 | -3.0863264779 | -0.2645755239 | -1.6665389512 |
| O | 8.0 | -3.6341628432 | 0.5168811070  | -2.6216138882 |
| C | 6.0 | -3.0270990075 | -2.3808132267 | -0.4669066435 |
| C | 6.0 | -3.6471416694 | -1.5250244516 | -1.4114746168 |
| H | 1.0 | -5.5824430220 | 0.2569155515  | -0.6017804580 |
| H | 1.0 | -2.6938316467 | -4.4614202713 | -0.7311481643 |
| H | 1.0 | -3.5276458604 | -4.0806722952 | 0.7659062366  |
| C | 6.0 | -3.4778269154 | -3.8227772171 | -0.2978362826 |
| H | 1.0 | -4.9062345289 | -1.4825319380 | -3.1431538847 |
| C | 6.0 | -4.8921838153 | -1.9554339967 | -2.1533017386 |
| C | 6.0 | -6.3237628657 | -0.1762434710 | -1.2833440744 |
| H | 1.0 | -6.2724069799 | 0.3675767481  | -2.2339896559 |
| O | 8.0 | -6.1256759408 | -1.5682211801 | -1.4740055723 |
| H | 1.0 | -4.1967376607 | -3.8124624929 | -2.9720098898 |

|                        |            |   |     |               |               |               |
|------------------------|------------|---|-----|---------------|---------------|---------------|
|                        |            | H | 1.0 | -7.3210928040 | -0.0642918236 | -0.8478868214 |
|                        |            | C | 6.0 | -4.8328055358 | -4.2031348467 | -0.9343005209 |
|                        |            | C | 6.0 | -4.9857959909 | -3.4777310356 | -2.2875851796 |
|                        |            | O | 8.0 | -5.9117263147 | -3.8654802919 | -0.0565227689 |
|                        |            | H | 1.0 | -6.1391937809 | -2.9368052710 | -0.2418827884 |
|                        |            | H | 1.0 | -4.1362530893 | -6.0955519445 | -1.7824099908 |
|                        |            | H | 1.0 | -4.8210025392 | -6.2192652170 | -0.1472655203 |
|                        |            | C | 6.0 | -4.9214106807 | -5.7211728798 | -1.1172993183 |
|                        |            | H | 1.0 | -5.9519322390 | -3.7395684510 | -2.7337420378 |
|                        |            | H | 1.0 | -5.8972235096 | -5.9889427795 | -1.5341904014 |
|                        |            | H | 1.0 | -1.6755893210 | -1.2335150052 | -4.6571956844 |
|                        |            | O | 8.0 | -0.7078652215 | -1.2512157815 | -4.3405062849 |
|                        |            | O | 8.0 | -3.1862040126 | -0.9573261527 | -4.5127698946 |
|                        |            | H | 1.0 | -5.5386010933 | -0.6119987362 | -4.4985598968 |
|                        |            | H | 1.0 | 1.3145849942  | 1.4455080051  | -4.3382834449 |
|                        |            | H | 1.0 | 1.6442077170  | -0.9208021180 | -4.0712522247 |
|                        |            | H | 1.0 | 2.9056612184  | 0.9998004057  | -4.9647756388 |
|                        |            | C | 6.0 | 2.3918536303  | 1.6613741919  | -4.2532065460 |
|                        |            | C | 6.0 | -5.6463799850 | -0.1770575960 | -3.5116871959 |
|                        |            | H | 1.0 | -7.7692871145 | 0.1022945542  | -3.6082590312 |
|                        |            | H | 1.0 | 1.9543853775  | -2.0701680059 | -2.7921748239 |
|                        |            | C | 6.0 | -3.2173760378 | -0.4639767937 | -3.3290053909 |
|                        |            | C | 6.0 | 1.7174205525  | -1.0145066227 | -2.9850104774 |
|                        |            | C | 6.0 | -0.7693581552 | -0.7361467440 | -3.0909635572 |
|                        |            | O | 8.0 | 4.0867485159  | -0.6916304216 | -3.0305114403 |
|                        |            | O | 8.0 | 2.6797029539  | 3.0098156829  | -4.5280507976 |
|                        |            | C | 6.0 | -6.8662383453 | 0.2186353285  | -3.0136791573 |
|                        |            | H | 1.0 | 4.8235850260  | -0.2838750404 | -2.5523983037 |
|                        |            | C | 6.0 | -4.4737317541 | -0.0254484679 | -2.7379882733 |
|                        |            | C | 6.0 | -2.0151018270 | -0.3239485674 | -2.5440217492 |
|                        |            | C | 6.0 | 2.8742906211  | -0.1925298258 | -2.4254781888 |
|                        |            | C | 6.0 | 0.4084825286  | -0.6084699358 | -2.3465351889 |
|                        |            | C | 6.0 | 2.8353042393  | 1.2892091521  | -2.8460145470 |
|                        |            | H | 1.0 | 2.9534487790  | 3.3767504699  | -3.6677778619 |
|                        |            | O | 8.0 | 3.2575137983  | 2.1735496001  | -2.1125904349 |
|                        |            | C | 6.0 | -6.9603077149 | 0.7805694061  | -1.7245586816 |
|                        |            | C | 6.0 | -4.5318785925 | 0.5430938567  | -1.4235525693 |
|                        |            | H | 1.0 | 3.0528463175  | -1.4246810955 | -0.7107677119 |
|                        |            | C | 6.0 | -2.0604774187 | 0.2394128120  | -1.2374416638 |
|                        |            | C | 6.0 | 2.9119946328  | -0.3570161103 | -0.9083464872 |
|                        |            | C | 6.0 | 0.3701754275  | -0.0720182483 | -1.0382181663 |
|                        |            | H | 1.0 | -7.9301957995 | 1.0853525648  | -1.3517707980 |
|                        |            | C | 6.0 | -5.8227258070 | 0.9421742577  | -0.9403813886 |
| 4'-O-methyldoxorubicin | 77121-90-5 |   |     |               |               |               |

|                       |            |   |     |               |               |               |
|-----------------------|------------|---|-----|---------------|---------------|---------------|
|                       |            | H | 1.0 | 3.7637986573  | 0.1830945239  | -0.4811547540 |
|                       |            | C | 6.0 | -3.3081827466 | 0.6959648078  | -0.6416527325 |
|                       |            | C | 6.0 | -0.8502609807 | 0.3668793150  | -0.4978189920 |
|                       |            | C | 6.0 | 1.6229134400  | 0.0950217798  | -0.2006820406 |
|                       |            | H | 1.0 | 1.7184682247  | 1.1498521185  | 0.0822661561  |
|                       |            | O | 8.0 | -5.8817777593 | 1.4810292015  | 0.3131289564  |
|                       |            | O | 8.0 | -3.2959119682 | 1.2101986105  | 0.5299872688  |
|                       |            | O | 8.0 | 1.5100028736  | -0.6801341191 | 1.0215053353  |
|                       |            | H | 1.0 | -7.5943421893 | 2.6735041772  | 0.2024876217  |
|                       |            | O | 8.0 | -0.8662359007 | 0.9237698492  | 0.7303539427  |
|                       |            | H | 1.0 | -7.8420136535 | 1.0467835455  | 0.8932091155  |
|                       |            | H | 1.0 | 1.1234646781  | 1.0232805299  | 2.1031411163  |
|                       |            | C | 6.0 | -7.1348348016 | 1.8853853483  | 0.8163802311  |
|                       |            | H | 1.0 | -1.8645330806 | 1.1499700519  | 0.8720128331  |
|                       |            | C | 6.0 | 1.5823154309  | 0.0394646290  | 2.2220377386  |
|                       |            | H | 1.0 | -0.1245714411 | -1.0388466503 | 2.9179787855  |
|                       |            | H | 1.0 | -6.9406001122 | 2.2803825339  | 1.8159154768  |
|                       |            | C | 6.0 | 0.8655025415  | -0.7744856121 | 3.3017919465  |
|                       |            | H | 1.0 | 3.7027130526  | -1.4893372999 | 1.9475958890  |
|                       |            | O | 8.0 | 2.9397358827  | 0.3136180441  | 2.6019710803  |
|                       |            | H | 1.0 | 1.6662163333  | -2.6826349279 | 2.7922511894  |
|                       |            | H | 1.0 | 0.7174116015  | -0.1356482268 | 4.1778133232  |
|                       |            | C | 6.0 | 3.7239130006  | -0.8628052326 | 2.8514962789  |
|                       |            | C | 6.0 | 1.6546525798  | -2.0423602154 | 3.6842232834  |
|                       |            | H | 1.0 | 5.5095727696  | 0.1873718044  | 2.2591478424  |
|                       |            | H | 1.0 | 0.0876710564  | -2.8925802970 | 4.6862263804  |
|                       |            | N | 7.0 | 1.0990109587  | -2.8353029995 | 4.7853199907  |
|                       |            | C | 6.0 | 5.1561607458  | -0.4111965745 | 3.1031688667  |
|                       |            | C | 6.0 | 3.1369922951  | -1.7312458789 | 3.9810827385  |
|                       |            | H | 1.0 | 3.6754276513  | -2.6864631240 | 3.9754308953  |
|                       |            | H | 1.0 | 5.8127049109  | -1.2799778540 | 3.2168751999  |
|                       |            | H | 1.0 | 1.8900308494  | 0.0258827475  | 6.0234341188  |
|                       |            | H | 1.0 | 3.0503715330  | 0.7828896586  | 4.9070154444  |
|                       |            | H | 1.0 | 1.2864432623  | -2.3531650180 | 5.6616176704  |
|                       |            | H | 1.0 | 5.2326056374  | 0.1906305669  | 4.0116536854  |
|                       |            | C | 6.0 | 2.9408749126  | 0.0393459548  | 5.6999936822  |
|                       |            | O | 8.0 | 3.3958549336  | -1.2522084370 | 5.3095498380  |
|                       |            | H | 1.0 | 3.5527040874  | 0.3318441497  | 6.5600041304  |
| Morpholino adriamycin | 89196-04-3 | H | 1.0 | -4.0120526910 | 4.2520919112  | 4.8486899958  |
|                       |            | H | 1.0 | -5.4737236594 | 4.2122017823  | 3.8255808927  |
|                       |            | C | 6.0 | -4.3746352783 | 4.1855222960  | 3.8129047379  |
|                       |            | H | 1.0 | -4.0036700621 | 5.0440562701  | 3.2492274723  |
|                       |            | H | 1.0 | -5.3720709759 | 2.5138861720  | 5.2962299626  |

|   |     |               |               |               |
|---|-----|---------------|---------------|---------------|
| O | 8.0 | -3.8776438592 | 3.0453796409  | 3.1480007084  |
| C | 6.0 | -4.9783356439 | 1.6497842206  | 4.7757719106  |
| C | 6.0 | -4.1878317551 | 1.8116906766  | 3.6430138521  |
| H | 1.0 | -5.8964753661 | 0.2588719160  | 6.1484559156  |
| C | 6.0 | -5.2765592841 | 0.3606809860  | 5.2609651177  |
| O | 8.0 | -2.5161903019 | 1.9171032269  | 1.2243670558  |
| C | 6.0 | -3.6611964801 | 0.6743022881  | 2.9439048183  |
| C | 6.0 | -2.8342388196 | 0.7879572786  | 1.7503205465  |
| H | 1.0 | -1.7465110402 | 1.5022688426  | 0.0769396070  |
| C | 6.0 | -4.7875578230 | -0.7542300302 | 4.6193761584  |
| C | 6.0 | -3.9822635228 | -0.6218788599 | 3.4666076073  |
| O | 8.0 | -1.2307468466 | 0.8464379546  | -0.5496003304 |
| H | 1.0 | -4.9969243518 | -1.7589585643 | 4.9676733149  |
| H | 1.0 | 5.9018205985  | -0.3076339452 | -0.8337111204 |
| C | 6.0 | -2.3538770864 | -0.4392978694 | 1.1386882794  |
| C | 6.0 | -1.5333753814 | -0.3582858844 | -0.0190102560 |
| C | 6.0 | -3.4975413399 | -1.8468902933 | 2.8418905534  |
| H | 1.0 | 5.4840311117  | -0.6753870341 | 0.8490331133  |
| O | 8.0 | 4.6098237079  | 1.9055426837  | -1.1591662596 |
| H | 1.0 | 4.5159532890  | 1.3996295010  | -1.9811817685 |
| H | 1.0 | -0.4296303341 | -0.5260438299 | -2.4054673596 |
| C | 6.0 | 5.1750670866  | -0.8121123252 | -0.1921109683 |
| C | 6.0 | -2.6689573325 | -1.7237169692 | 1.6664634032  |
| H | 1.0 | 1.9331431216  | -0.4902256254 | -3.1237906820 |
| H | 1.0 | 5.1784970798  | -1.8811180081 | -0.4202935247 |
| O | 8.0 | -3.7982483735 | -2.9931423808 | 3.3273839233  |
| C | 6.0 | -1.0318826388 | -1.5221325587 | -0.6188638554 |
| C | 6.0 | -0.1043394832 | -1.3717392706 | -1.7906787037 |
| C | 6.0 | -2.1687840090 | -2.8937778042 | 1.0308530796  |
| H | 1.0 | -0.9480282986 | -2.7923908886 | -3.1805985835 |
| C | 6.0 | 3.6994231171  | 1.2896322559  | -0.2373257041 |
| C | 6.0 | 2.0574971306  | -0.2224205406 | -2.0651328833 |
| C | 6.0 | 3.7835023324  | -0.2367300608 | -0.3996785139 |
| H | 1.0 | 2.2719794046  | 1.8428737906  | -2.6200958597 |
| H | 1.0 | 4.0267028145  | 1.5918410105  | 0.7629659454  |
| H | 1.0 | 0.9077935959  | 4.2365854931  | 1.3173915536  |
| C | 6.0 | -1.3499452763 | -2.7957386343 | -0.1009613573 |
| H | 1.0 | 1.9237171218  | 5.7056807056  | -2.3404527196 |
| H | 1.0 | -3.0563512230 | -3.9265634327 | 2.3205590855  |
| O | 8.0 | 1.2261280941  | -1.0461380844 | -1.2542987717 |
| O | 8.0 | 3.4011014888  | -0.5512148440 | -1.7640045539 |
| C | 6.0 | -0.0059742289 | -2.6399291761 | -2.6440684117 |
| O | 8.0 | -2.4793077341 | -4.1186847695 | 1.5086222923  |
| O | 8.0 | 0.3498576296  | 5.2298175090  | -1.1548547126 |

|     |            |   |     |               |               |               |
|-----|------------|---|-----|---------------|---------------|---------------|
|     |            | C | 6.0 | 1.7599438006  | 1.2685051634  | -1.8381047268 |
|     |            | N | 7.0 | 2.0092236596  | 3.1259161077  | -0.0693156796 |
|     |            | H | 1.0 | 0.7862197590  | -2.5276718073 | -3.3946616886 |
|     |            | H | 1.0 | -1.7277453170 | -4.5392754832 | -1.2911813803 |
|     |            | H | 1.0 | 3.0764003756  | -0.7167499244 | 0.2863026154  |
|     |            | C | 6.0 | 2.2288073369  | 1.7301752591  | -0.4356974912 |
|     |            | C | 6.0 | 0.7214420089  | 3.4955723707  | 0.5239840141  |
|     |            | C | 6.0 | 1.5169344386  | 4.8118341041  | -1.8520534905 |
|     |            | H | 1.0 | -1.1358928424 | 4.5109040573  | 0.0396615942  |
|     |            | C | 6.0 | -0.8854872441 | -4.0739291930 | -0.7624831939 |
|     |            | C | 6.0 | -0.2533600148 | 4.1227605936  | -0.4767215981 |
|     |            | H | 1.0 | 2.8890451605  | 5.0123820967  | -0.2254009413 |
|     |            | C | 6.0 | 2.5506963454  | 4.2052228133  | -0.8948766442 |
|     |            | H | 1.0 | 0.6859203972  | 1.4356562332  | -1.9386547374 |
|     |            | C | 6.0 | 0.2707658233  | -3.8837475713 | -1.7678772074 |
|     |            | H | 1.0 | 1.2450964063  | 4.0857075638  | -2.6376417644 |
|     |            | H | 1.0 | 0.2513710996  | 2.6240372831  | 0.9852135609  |
|     |            | H | 1.0 | 1.6468502576  | 1.1479945818  | 0.2867596081  |
|     |            | O | 8.0 | -0.6028856127 | -5.5081463659 | -3.3279831621 |
|     |            | H | 1.0 | -0.5694150915 | -4.7922344611 | 0.0006184848  |
|     |            | H | 1.0 | 1.7080989872  | -2.8283707880 | -0.9806355651 |
|     |            | H | 1.0 | -0.5874470648 | 3.3730983617  | -1.2097670321 |
|     |            | C | 6.0 | 0.3563760581  | -5.1032134809 | -2.6850854463 |
|     |            | O | 8.0 | 1.5308017403  | -3.7773005205 | -1.1114652481 |
|     |            | H | 1.0 | 3.4260843507  | 3.8442108402  | -1.4371880026 |
|     |            | C | 6.0 | 1.6867779797  | -5.8263686991 | -2.8235885974 |
|     |            | H | 1.0 | 0.6476001340  | -6.8745394709 | -4.0139417969 |
|     |            | H | 1.0 | 2.4502670423  | -5.0936092557 | -3.1230837379 |
|     |            | O | 8.0 | 1.5850790665  | -6.8827766022 | -3.7444748046 |
|     |            | H | 1.0 | 1.9898692072  | -6.1747150177 | -1.8244895535 |
| MX2 | NCI 619003 | H | 1.0 | -2.8175053836 | 3.0967007919  | -4.6363037685 |
|     |            | H | 1.0 | -3.8750516140 | 1.7207762399  | -5.0191686619 |
|     |            | H | 1.0 | -1.5673356438 | 0.8972964969  | -4.6663311010 |
|     |            | C | 6.0 | -3.2534834388 | 2.1757922833  | -4.2401755603 |
|     |            | H | 1.0 | -0.0615070746 | 2.8228912294  | -3.9621346556 |
|     |            | O | 8.0 | 0.7515995001  | 0.8082854932  | -3.8479140014 |
|     |            | O | 8.0 | -0.6746084304 | 3.0671636546  | -3.2495472013 |
|     |            | C | 6.0 | -2.1524795011 | 1.2094826204  | -3.7939842140 |
|     |            | H | 1.0 | 0.8428072451  | -0.1342498811 | -4.0847341288 |
|     |            | H | 1.0 | -3.9187268065 | 2.4555974901  | -3.4151244798 |
|     |            | H | 1.0 | 0.6888016618  | -2.8528668244 | -3.8038416456 |
|     |            | H | 1.0 | -2.5961298011 | 0.2989334514  | -3.3747474726 |
|     |            | O | 8.0 | 0.6396137581  | -1.8267215905 | -3.6494581594 |

|   |     |               |               |               |
|---|-----|---------------|---------------|---------------|
| C | 6.0 | -1.1629987699 | 1.8063458869  | -2.7655330474 |
| C | 6.0 | 0.0745461165  | 0.8764681889  | -2.5982763231 |
| O | 8.0 | 0.4369615699  | -4.2656536999 | -3.4991780013 |
| H | 1.0 | 0.7359011326  | 1.3953447015  | -1.8897251128 |
| C | 6.0 | -0.0780574566 | -1.6975245118 | -2.5016658152 |
| H | 1.0 | 0.1235324415  | -6.6843739003 | -3.1678472642 |
| C | 6.0 | -0.3548391886 | -0.4357918858 | -1.9760350244 |
| C | 6.0 | -0.2461973110 | -4.1633529685 | -2.4159608103 |
| H | 1.0 | -2.9137721723 | 2.0016447863  | -1.4856000952 |
| C | 6.0 | -1.8249116155 | 2.0520311778  | -1.3877156417 |
| C | 6.0 | -0.5498384278 | -2.8706385302 | -1.8467129104 |
| C | 6.0 | -0.4566262558 | -6.6255618792 | -2.2542561545 |
| H | 1.0 | -1.5751996910 | 3.0653124687  | -1.0622065827 |
| C | 6.0 | -0.7359532180 | -5.3487888439 | -1.7291044727 |
| H | 1.0 | -0.7019440930 | -8.7432552614 | -2.0140170766 |
| C | 6.0 | -1.1226414498 | -0.3172510362 | -0.7903480806 |
| C | 6.0 | -0.9198671167 | -7.7591517831 | -1.6053787603 |
| C | 6.0 | -1.3156050198 | -2.7514174063 | -0.6471620243 |
| C | 6.0 | -1.4085137755 | 1.0735047552  | -0.2717454894 |
| H | 1.0 | 5.7250565539  | 2.5315345778  | 0.2761821201  |
| C | 6.0 | -1.4970871800 | -5.2233057133 | -0.5277574386 |
| C | 6.0 | -1.5934882809 | -1.4529488946 | -0.1272748728 |
| H | 1.0 | 3.5074875728  | 3.7857150378  | 0.3732483025  |
| C | 6.0 | -1.7986539968 | -3.9260339201 | 0.0308543349  |
| C | 6.0 | -1.6697385254 | -7.6611740119 | -0.4233240391 |
| O | 8.0 | -0.2125990714 | 1.6404978282  | 0.3569469735  |
| H | 1.0 | 4.3599239222  | 1.4646849422  | 0.6824104981  |
| H | 1.0 | -2.1894842445 | 1.0313917679  | 0.4905787322  |
| C | 6.0 | -1.9618327562 | -6.4109523485 | 0.1198762933  |
| H | 1.0 | -2.0363964991 | -8.5435870697 | 0.0915557188  |
| O | 8.0 | -2.3101699794 | -1.3070091739 | 1.0124205256  |
| C | 6.0 | 4.9632087638  | 2.3177826170  | 1.0339292892  |
| H | 1.0 | 1.5460378192  | 3.4367123117  | 1.1549665837  |
| C | 6.0 | 4.0773596340  | 3.5457326023  | 1.2772028991  |
| O | 8.0 | -2.4946249875 | -3.8219826082 | 1.1254131464  |
| H | 1.0 | -2.5374111428 | -2.2436894241 | 1.2969122444  |
| H | 1.0 | -0.7455398217 | 3.6990174374  | 1.5833136731  |
| H | 1.0 | 4.7461391162  | 4.3968943144  | 1.4826105485  |
| O | 8.0 | -2.6833693264 | -6.3449282640 | 1.2555049080  |
| H | 1.0 | -2.7690850423 | -5.3661984369 | 1.4544309968  |
| H | 1.0 | 2.1034071813  | 1.0146543594  | 1.2097150749  |
| O | 8.0 | 5.6669681169  | 1.9627022100  | 2.2218268279  |
| C | 6.0 | 0.0176438587  | 1.2118019423  | 1.6712046900  |
| C | 6.0 | 1.7872630728  | 2.9839954178  | 2.1238580284  |

|            |                            |                                                                                                                                                                                                                                                                                                                                                                                                                                                                                                                                                                                                                                                                                                                                                                                                                                                                                                                                                                                                                                                                                                                                                                                                            |
|------------|----------------------------|------------------------------------------------------------------------------------------------------------------------------------------------------------------------------------------------------------------------------------------------------------------------------------------------------------------------------------------------------------------------------------------------------------------------------------------------------------------------------------------------------------------------------------------------------------------------------------------------------------------------------------------------------------------------------------------------------------------------------------------------------------------------------------------------------------------------------------------------------------------------------------------------------------------------------------------------------------------------------------------------------------------------------------------------------------------------------------------------------------------------------------------------------------------------------------------------------------|
|            |                            | C 6.0 1.4952280848 1.4688562901 1.9959410523<br>C 6.0 -0.6522051352 3.3204851501 2.6085391649<br>H 1.0 0.9632023183 4.6677084979 3.2080750595<br>N 7.0 3.1637398377 3.3958573074 2.4074736389<br>H 1.0 -0.2480575773 0.1572589419 1.7942655199<br>H 1.0 -2.7281550971 3.5933754397 3.1201799224<br>C 6.0 0.7729886248 3.5921648843 3.1238393845<br>O 8.0 -0.8417137742 1.8922355687 2.6032602677<br>H 1.0 -1.7044467110 5.0105563510 3.4455266106<br>H 1.0 4.1517967704 0.7892810747 3.0215964578<br>C 6.0 -1.7477840139 3.9168871366 3.4793850189<br>C 6.0 4.7571002383 1.6725274044 3.2822490854<br>H 1.0 1.7370569884 0.9615745819 2.9365611692<br>C 6.0 3.8580840319 2.8765918819 3.5882023242<br>H 1.0 4.5019551505 3.6776650928 3.9841327314<br>H 1.0 5.3729469623 1.4193798332 4.1524922701<br>H 1.0 -1.6318272567 3.6019431932 4.5194977011<br>O 8.0 0.8973989703 3.0538104843 4.4461499284<br>H 1.0 3.1236791807 2.6346829598 4.3577617427<br>H 1.0 0.3957008064 2.2228566686 4.4242015147                                                                                                                                                                                                        |
| NSC 286628 | NSC 286628 /<br>67903-59-7 | H 1.0 -0.7766465836 -1.7356223512 -6.4479628919<br>H 1.0 -3.0862655898 -2.1378662528 -7.0561646145<br>H 1.0 -5.4585098384 -2.3810726051 -6.3833704276<br>H 1.0 -0.9056820657 -0.0388004741 -5.9997551008<br>C 6.0 -3.4035502154 -1.8155431800 -6.0662384671<br>C 6.0 -4.7402512450 -1.9541201433 -5.6880338810<br>H 1.0 -0.0817499090 -3.5093521994 -5.7483068995<br>C 6.0 -1.0283470123 -1.0596189380 -5.6185961521<br>C 6.0 -2.4660421827 -1.2721209564 -5.1821567563<br>C 6.0 -5.1470880179 -1.5581341547 -4.4133707411<br>H 1.0 -6.1850118974 -1.6723107994 -4.1119035308<br>C 6.0 -2.8772656771 -0.8744148800 -3.9029795594<br>C 6.0 -4.2116834170 -1.0228873332 -3.5243194184<br>H 1.0 -2.1391352885 -0.4648908136 -3.2165921220<br>H 1.0 0.6246206049 -5.6379259571 -4.7079059759<br>H 1.0 -4.5217356962 -0.7202480614 -2.5278159349<br>C 6.0 0.1998879768 -3.5205920530 -4.7017567388<br>O 8.0 -0.0981403740 -1.1341989883 -4.5524641021<br>C 6.0 0.6154843985 -4.7290960494 -4.1112227154<br>C 6.0 0.1825502642 -2.3446035447 -3.9640863592<br>C 6.0 1.0257019858 -4.7511853533 -2.7964941508<br>C 6.0 0.5372144730 -2.3370861082 -2.5768891227<br>H 1.0 1.3735370683 -5.6583144752 -2.3158446826 |



|   |     |               |               |               |
|---|-----|---------------|---------------|---------------|
| O | 8.0 | -0.0727642086 | -0.0463523413 | -2.1488998664 |
| C | 6.0 | 0.9980459164  | -3.5748559711 | -2.0170561490 |
| C | 6.0 | 0.4234821091  | -1.1539033488 | -1.7285591802 |
| H | 1.0 | 0.0921305824  | 0.8211734256  | -0.9645195476 |
| C | 6.0 | 1.4478781117  | -3.6686496987 | -0.6359760411 |
| O | 8.0 | 1.8948252751  | -4.7748267347 | -0.1664399356 |
| C | 6.0 | 0.8702333856  | -1.2588543692 | -0.3485573906 |
| H | 1.0 | 0.3728482374  | 5.4833025457  | -0.2495801537 |
| O | 8.0 | 0.3424254739  | 1.0551081896  | 0.0067647485  |
| C | 6.0 | 1.3786282101  | -2.4805670120 | 0.1798927127  |
| H | 1.0 | -2.0063126298 | 4.2651301206  | 0.0344639574  |
| C | 6.0 | 0.8026102181  | -0.1139431023 | 0.4989796366  |
| N | 7.0 | 0.4401508189  | 5.4307886362  | 0.7657213532  |
| H | 1.0 | 0.2020754330  | 3.3557973526  | 0.6078693176  |
| H | 1.0 | -0.1376333958 | 6.1947342463  | 1.1183621052  |
| C | 6.0 | -0.1824531859 | 4.1794438379  | 1.2178492277  |
| H | 1.0 | -4.1524057871 | 2.7502689671  | 0.5899561137  |
| H | 1.0 | 2.2605047018  | -4.3389391294 | 1.2654399244  |
| C | 6.0 | -1.7245573983 | 4.1842330861  | 1.0921281400  |
| C | 6.0 | 1.8265329523  | -2.5315709087 | 1.5268590330  |
| H | 1.0 | -1.8521426784 | 2.0367043475  | 1.2060582579  |
| C | 6.0 | 1.2298728095  | -0.1853923311 | 1.8368947657  |
| O | 8.0 | 2.3322177493  | -3.6780113868 | 2.0364787330  |
| O | 8.0 | -2.2782138281 | 5.3397853459  | 1.7415141147  |
| C | 6.0 | -2.3089517703 | 2.9013650035  | 1.6974459460  |
| H | 1.0 | 1.7172258525  | 1.8557172235  | 2.1646731273  |
| C | 6.0 | 1.7597371773  | -1.3950532678 | 2.3417137047  |
| H | 1.0 | 4.6877214296  | -1.3340165044 | 2.2135713550  |
| C | 6.0 | -3.8252426140 | 2.8127469689  | 1.6328681696  |
| H | 1.0 | 1.2900990146  | 3.8041456489  | 2.7645026314  |
| C | 6.0 | 0.2063778891  | 3.9215592818  | 2.6829700145  |
| C | 6.0 | 1.1588442757  | 1.0705961664  | 2.6881304534  |
| H | 1.0 | 6.0194841403  | -0.2145096387 | 2.6318634559  |
| O | 8.0 | -0.2253957232 | 1.4618421191  | 2.7733396816  |
| H | 1.0 | -4.2892799543 | 3.6942374238  | 2.0842509884  |
| H | 1.0 | -4.1710942632 | 1.9199657075  | 2.1604573129  |
| H | 1.0 | -2.3235505483 | 5.0931770538  | 2.6787591345  |
| C | 6.0 | 5.1199059115  | -0.7088081246 | 3.0016835799  |
| H | 1.0 | -0.0485562082 | 4.8050602137  | 3.2838419501  |
| O | 8.0 | 4.3450775289  | 1.5302297550  | 3.3250837659  |
| C | 6.0 | -0.5498997937 | 2.7328541399  | 3.2989465357  |
| O | 8.0 | -1.9464211798 | 2.8895527684  | 3.1022067168  |
| C | 6.0 | 4.1216452859  | 0.3364630538  | 3.4477834495  |
| H | 1.0 | 3.0742833105  | -2.2598761702 | 3.7957511473  |

|             |           |   |     |               |               |               |
|-------------|-----------|---|-----|---------------|---------------|---------------|
|             |           | C | 6.0 | 2.3083840263  | -1.4830643619 | 3.7474138781  |
|             |           | H | 1.0 | 5.3682427803  | -1.3693724037 | 3.8386970692  |
|             |           | C | 6.0 | 1.7307248444  | 0.8994278848  | 4.1118748222  |
|             |           | C | 6.0 | 2.8506682255  | -0.1339210056 | 4.2032181997  |
|             |           | H | 1.0 | 1.5329143862  | -1.7810951015 | 4.4668597651  |
|             |           | H | 1.0 | -0.4223961639 | 2.7369081654  | 4.3927476508  |
|             |           | H | 1.0 | 2.0887429134  | 1.8655808886  | 4.4845316007  |
|             |           | H | 1.0 | 0.9231825820  | 0.5541235346  | 4.7662086946  |
|             |           | O | 8.0 | 3.2941600753  | -0.2945265384 | 5.5687342097  |
|             |           | H | 1.0 | 3.5316643768  | 0.5897466230  | 5.8840446128  |
|             |           | C | 6.0 | 5.2914247370  | 2.8526786991  | 2.1053505330  |
|             |           | C | 6.0 | 4.6516431829  | 1.4751982195  | 1.8845678920  |
|             |           | C | 6.0 | 5.3220138670  | 0.3112779711  | 2.6514400601  |
|             |           | C | 6.0 | 4.8716114517  | 0.2297641082  | 4.1364942277  |
|             |           | C | 6.0 | 3.3258709925  | 0.3140604478  | 4.2261950367  |
|             |           | C | 6.0 | 2.8085315111  | 1.5523780351  | 3.4765774888  |
|             |           | O | 8.0 | 3.2454341943  | 1.4760567760  | 2.1036665661  |
|             |           | O | 8.0 | 1.4223484639  | 1.5207585848  | 3.4575727011  |
|             |           | C | 6.0 | 0.7746206337  | 2.7207029310  | 2.9472510675  |
|             |           | C | 6.0 | 0.1675687875  | 2.3358112789  | 1.5946958587  |
|             |           | C | 6.0 | -0.9224261577 | 3.2947432196  | 1.1238551734  |
|             |           | C | 6.0 | -2.0812920045 | 3.2301150131  | 2.1652281770  |
|             |           | C | 6.0 | -1.5995385117 | 3.4676884655  | 3.6032976467  |
|             |           | C | 6.0 | -0.2436301863 | 3.2338659113  | 3.9446407226  |
|             |           | C | 6.0 | 0.1846886927  | 3.5493921293  | 5.2427400045  |
|             |           | C | 6.0 | -0.7265293963 | 4.0282052150  | 6.2332688297  |
|             |           | C | 6.0 | -2.0904091114 | 4.1993756392  | 5.8755287784  |
|             |           | C | 6.0 | -2.4991846390 | 3.9115726110  | 4.5639408273  |
|             |           | C | 6.0 | -3.0874444330 | 4.6624032019  | 6.8483161328  |
|             |           | O | 8.0 | -4.3166911248 | 4.6107830680  | 6.5739523365  |
|             |           | C | 6.0 | -2.5657400794 | 5.1139183129  | 8.1422147729  |
|             |           | C | 6.0 | -3.4041312452 | 5.7361553855  | 9.0941765144  |
|             |           | C | 6.0 | -3.0570747991 | 5.8178813727  | 10.4433916439 |
|             |           | C | 6.0 | -1.7645883418 | 5.4267269108  | 10.8343768888 |
|             |           | C | 6.0 | -0.8314689653 | 4.9982373424  | 9.8946061749  |
|             |           | C | 6.0 | -1.2209728578 | 4.8091075553  | 8.5320594588  |
|             |           | C | 6.0 | -0.2740119494 | 4.2932038587  | 7.5761286397  |
|             |           | O | 8.0 | 0.9627540726  | 4.0669065346  | 7.9175258071  |
|             |           | O | 8.0 | 0.4248566935  | 4.7236632220  | 10.3048835422 |
|             |           | C | 6.0 | -4.1461637201 | 6.1879063431  | 11.4430129407 |
|             |           | C | 6.0 | -4.9048755988 | 4.9266893714  | 11.9481224802 |
|             |           | C | 6.0 | -5.4385632306 | 4.1144357156  | 10.7508857185 |
|             |           | C | 6.0 | -6.2785186185 | 5.0049184822  | 9.8035945609  |
| Nogalamycin | 1404-15-5 | C | 6.0 | 5.2914247370  | 2.8526786991  | 2.1053505330  |
|             |           | C | 6.0 | 4.6516431829  | 1.4751982195  | 1.8845678920  |
|             |           | C | 6.0 | 5.3220138670  | 0.3112779711  | 2.6514400601  |
|             |           | C | 6.0 | 4.8716114517  | 0.2297641082  | 4.1364942277  |
|             |           | C | 6.0 | 3.3258709925  | 0.3140604478  | 4.2261950367  |
|             |           | C | 6.0 | 2.8085315111  | 1.5523780351  | 3.4765774888  |
|             |           | O | 8.0 | 3.2454341943  | 1.4760567760  | 2.1036665661  |
|             |           | O | 8.0 | 1.4223484639  | 1.5207585848  | 3.4575727011  |
|             |           | C | 6.0 | 0.7746206337  | 2.7207029310  | 2.9472510675  |
|             |           | C | 6.0 | 0.1675687875  | 2.3358112789  | 1.5946958587  |
|             |           | C | 6.0 | -0.9224261577 | 3.2947432196  | 1.1238551734  |
|             |           | C | 6.0 | -2.0812920045 | 3.2301150131  | 2.1652281770  |
|             |           | C | 6.0 | -1.5995385117 | 3.4676884655  | 3.6032976467  |
|             |           | C | 6.0 | -0.2436301863 | 3.2338659113  | 3.9446407226  |
|             |           | C | 6.0 | 0.1846886927  | 3.5493921293  | 5.2427400045  |
|             |           | C | 6.0 | -0.7265293963 | 4.0282052150  | 6.2332688297  |
|             |           | C | 6.0 | -2.0904091114 | 4.1993756392  | 5.8755287784  |
|             |           | C | 6.0 | -2.4991846390 | 3.9115726110  | 4.5639408273  |
|             |           | C | 6.0 | -3.0874444330 | 4.6624032019  | 6.8483161328  |
|             |           | O | 8.0 | -4.3166911248 | 4.6107830680  | 6.5739523365  |
|             |           | C | 6.0 | -2.5657400794 | 5.1139183129  | 8.1422147729  |
|             |           | C | 6.0 | -3.4041312452 | 5.7361553855  | 9.0941765144  |
|             |           | C | 6.0 | -3.0570747991 | 5.8178813727  | 10.4433916439 |
|             |           | C | 6.0 | -1.7645883418 | 5.4267269108  | 10.8343768888 |
|             |           | C | 6.0 | -0.8314689653 | 4.9982373424  | 9.8946061749  |
|             |           | C | 6.0 | -1.2209728578 | 4.8091075553  | 8.5320594588  |
|             |           | C | 6.0 | -0.2740119494 | 4.2932038587  | 7.5761286397  |
|             |           | O | 8.0 | 0.9627540726  | 4.0669065346  | 7.9175258071  |
|             |           | O | 8.0 | 0.4248566935  | 4.7236632220  | 10.3048835422 |
|             |           | C | 6.0 | -4.1461637201 | 6.1879063431  | 11.4430129407 |
|             |           | C | 6.0 | -4.9048755988 | 4.9266893714  | 11.9481224802 |
|             |           | C | 6.0 | -5.4385632306 | 4.1144357156  | 10.7508857185 |
|             |           | C | 6.0 | -6.2785186185 | 5.0049184822  | 9.8035945609  |

|   |     |               |               |               |
|---|-----|---------------|---------------|---------------|
| C | 6.0 | -5.6170828301 | 6.3902418695  | 9.5947366887  |
| O | 8.0 | -4.5880725211 | 6.2768736074  | 8.6378469227  |
| O | 8.0 | -5.1670967595 | 6.9850510306  | 10.7874559289 |
| O | 8.0 | -6.5431937472 | 4.3988805916  | 8.5552682115  |
| N | 7.0 | -6.0726023136 | 2.8753103992  | 11.2503184883 |
| C | 6.0 | -7.4040749936 | 3.0357900022  | 11.8258846181 |
| C | 6.0 | -6.0475348651 | 1.7743715735  | 10.2842524150 |
| O | 8.0 | -4.0831861569 | 4.1149071886  | 12.7623164154 |
| C | 6.0 | -3.6552621862 | 7.0358684368  | 12.6102695689 |
| O | 8.0 | 1.4867837682  | 3.3994482001  | 5.5478937486  |
| C | 6.0 | -3.1711493352 | 4.2270449733  | 1.8070771621  |
| O | 8.0 | -2.9849140785 | 5.3530158160  | 1.3713386337  |
| O | 8.0 | -4.4058862405 | 3.7296825451  | 2.0095471631  |
| C | 6.0 | -5.4907750736 | 4.6491831860  | 1.7930085463  |
| C | 6.0 | -1.4231484047 | 2.9004006123  | -0.2768257101 |
| O | 8.0 | -0.3346487202 | 4.5928027594  | 1.0743249887  |
| O | 8.0 | 2.9954560504  | 0.3025072706  | 5.5993947308  |
| C | 6.0 | 1.6913572304  | -0.1626820479 | 5.9160605960  |
| C | 6.0 | 5.3613615582  | -1.0576701172 | 4.8069666600  |
| O | 8.0 | 5.3495836006  | 1.4129830329  | 4.8037132058  |
| C | 6.0 | 6.6814859932  | 1.4329305908  | 5.2711783320  |
| O | 8.0 | 5.0023729628  | -0.9419297653 | 2.0408399221  |
| C | 6.0 | 5.8039961552  | -1.2777173133 | 0.9317052192  |
| H | 1.0 | 4.7460822099  | 1.2403609311  | 0.8168796926  |
| H | 1.0 | 6.4160852430  | 0.4489478492  | 2.6329099356  |
| H | 1.0 | 2.9101443446  | -0.5644026280 | 3.7083423237  |
| H | 1.0 | 3.1723097211  | 2.4704865973  | 3.9506689366  |
| H | 1.0 | 1.5443318967  | 3.4857208282  | 2.8008293283  |
| H | 1.0 | -2.5307674037 | 2.2311540337  | 2.0987273027  |
| H | 1.0 | -5.7521447096 | 5.3232941093  | 12.5358864859 |
| H | 1.0 | -4.5614950597 | 3.7754987166  | 10.1928778881 |
| H | 1.0 | -7.2525072395 | 5.1948283676  | 10.2741256381 |
| H | 1.0 | 6.3427513138  | 2.8396125978  | 1.7934954705  |
| H | 1.0 | 4.7647123087  | 3.5935908141  | 1.4969185009  |
| H | 1.0 | 5.2507562843  | 3.1588451515  | 3.1505878282  |
| H | 1.0 | 0.9698218333  | 2.2805152808  | 0.8536139626  |
| H | 1.0 | -0.2549968400 | 1.3290333056  | 1.6899997655  |
| H | 1.0 | -3.5493640357 | 4.0537667556  | 4.3394887260  |
| H | 1.0 | -1.4595185869 | 5.4624883919  | 11.8731575215 |
| H | 1.0 | 0.9062884230  | 4.4179893627  | 9.4812911098  |
| H | 1.0 | -6.3421000332 | 7.0807863091  | 9.1560479350  |
| H | 1.0 | -5.7636093896 | 4.5245809331  | 7.9640063484  |
| H | 1.0 | -8.1902568968 | 3.2313902419  | 11.0765917248 |
| H | 1.0 | -7.6760209604 | 2.1174867154  | 12.3589962020 |

|             |            |   |     |               |               |               |
|-------------|------------|---|-----|---------------|---------------|---------------|
|             |            | H | 1.0 | -7.4117516016 | 3.8546526885  | 12.5508595574 |
|             |            | H | 1.0 | -5.0267581976 | 1.6317597947  | 9.9189998232  |
|             |            | H | 1.0 | -6.3617936991 | 0.8507604589  | 10.7858541904 |
|             |            | H | 1.0 | -6.6976227604 | 1.9500941407  | 9.4157470592  |
|             |            | H | 1.0 | -4.4580464712 | 3.2226830819  | 12.6447546791 |
|             |            | H | 1.0 | -3.1330899455 | 7.9221666395  | 12.2413429963 |
|             |            | H | 1.0 | -4.5117215409 | 7.3549044793  | 13.2124105331 |
|             |            | H | 1.0 | -2.9822180218 | 6.4577671615  | 13.2456650820 |
|             |            | H | 1.0 | 1.5615011841  | 3.6218698034  | 6.5276559692  |
|             |            | H | 1.0 | -6.3979000357 | 4.0849691628  | 2.0073157586  |
|             |            | H | 1.0 | -5.4048634195 | 5.5028617149  | 2.4687652595  |
|             |            | H | 1.0 | -5.4911351700 | 5.0073773782  | 0.7605315653  |
|             |            | H | 1.0 | -1.8448479481 | 1.8889600606  | -0.2899716883 |
|             |            | H | 1.0 | -2.1881693353 | 3.5994690834  | -0.6302253172 |
|             |            | H | 1.0 | -0.5863997812 | 2.9365537946  | -0.9804023539 |
|             |            | H | 1.0 | -1.0736859402 | 5.2260234534  | 1.0692554678  |
|             |            | H | 1.0 | 1.6365614230  | -0.1972287740 | 7.0073018196  |
|             |            | H | 1.0 | 0.9161402077  | 0.5016501606  | 5.5304654315  |
|             |            | H | 1.0 | 1.5234653626  | -1.1774234829 | 5.5189963906  |
|             |            | H | 1.0 | 6.4452763186  | -1.1778403626 | 4.7119645226  |
|             |            | H | 1.0 | 5.0869344540  | -1.0409967573 | 5.8630274859  |
|             |            | H | 1.0 | 4.8916779621  | -1.9187239088 | 4.3299459672  |
|             |            | H | 1.0 | 6.8566974986  | 2.4472180552  | 5.6390262237  |
|             |            | H | 1.0 | 6.8467831698  | 0.7318186337  | 6.0993616280  |
|             |            | H | 1.0 | 7.4221793379  | 1.2200881529  | 4.4845726525  |
|             |            | H | 1.0 | 5.4809579887  | -2.2644006173 | 0.5891958781  |
|             |            | H | 1.0 | 5.6956232862  | -0.5709953567 | 0.0953948436  |
|             |            | H | 1.0 | 6.8721395912  | -1.3273224002 | 1.2002367999  |
|             |            | H | 1.0 | 2.6523760733  | 1.3257437971  | -1.6935225064 |
|             |            | H | 1.0 | 2.0203545802  | 1.8774922567  | 1.8130695907  |
|             |            | O | 8.0 | 3.8655472282  | 2.0946294734  | 0.2287448911  |
|             |            | O | 8.0 | 1.0859747065  | 3.6636004707  | -3.8099942583 |
|             |            | H | 1.0 | 0.4552366562  | 4.0255129432  | -4.5249776574 |
|             |            | C | 6.0 | 2.2676824209  | 2.3416014855  | -1.5604014763 |
|             |            | H | 1.0 | -2.9039161457 | 4.6924583057  | -6.4019417820 |
|             |            | H | 1.0 | 3.2119875119  | -1.7617615738 | -0.5178666545 |
|             |            | H | 1.0 | 2.8064187677  | 2.9875609077  | -2.2571674713 |
|             |            | H | 1.0 | -5.3570289473 | 4.6683762942  | -6.9150154730 |
|             |            | H | 1.0 | 4.3772803742  | 2.7897112963  | 0.6794522887  |
|             |            | C | 6.0 | 0.2616898764  | 2.9999130962  | -2.9634125715 |
|             |            | C | 6.0 | 1.5115510438  | 2.2223309067  | 0.9083626118  |
|             |            | O | 8.0 | -0.9090211362 | 4.2388041962  | -5.1967530463 |
|             |            | C | 6.0 | -3.6177639777 | 4.1971646373  | -5.7540823497 |
| Pirarubicin | 72496-41-4 | H | 1.0 | 2.6523760733  | 1.3257437971  | -1.6935225064 |
|             |            | H | 1.0 | 2.0203545802  | 1.8774922567  | 1.8130695907  |
|             |            | O | 8.0 | 3.8655472282  | 2.0946294734  | 0.2287448911  |
|             |            | O | 8.0 | 1.0859747065  | 3.6636004707  | -3.8099942583 |
|             |            | H | 1.0 | 0.4552366562  | 4.0255129432  | -4.5249776574 |
|             |            | C | 6.0 | 2.2676824209  | 2.3416014855  | -1.5604014763 |
|             |            | H | 1.0 | -2.9039161457 | 4.6924583057  | -6.4019417820 |
|             |            | H | 1.0 | 3.2119875119  | -1.7617615738 | -0.5178666545 |
|             |            | H | 1.0 | 2.8064187677  | 2.9875609077  | -2.2571674713 |
|             |            | H | 1.0 | -5.3570289473 | 4.6683762942  | -6.9150154730 |
|             |            | H | 1.0 | 4.3772803742  | 2.7897112963  | 0.6794522887  |
|             |            | C | 6.0 | 0.2616898764  | 2.9999130962  | -2.9634125715 |
|             |            | C | 6.0 | 1.5115510438  | 2.2223309067  | 0.9083626118  |
|             |            | O | 8.0 | -0.9090211362 | 4.2388041962  | -5.1967530463 |
|             |            | C | 6.0 | -3.6177639777 | 4.1971646373  | -5.7540823497 |

|   |     |               |               |               |
|---|-----|---------------|---------------|---------------|
| C | 6.0 | 0.7875174329  | 2.3661612838  | -1.8384624621 |
| H | 1.0 | 3.0816722553  | -4.5942984249 | 0.5913107239  |
| C | 6.0 | 2.6169070392  | 2.7044047489  | -0.0892034706 |
| C | 6.0 | -4.9661146937 | 4.1776707496  | -6.0267019584 |
| H | 1.0 | 0.8621433039  | 3.0500544100  | 1.2135543546  |
| C | 6.0 | -1.6746323140 | 3.6194777825  | -4.3731262549 |
| C | 6.0 | -1.1427754143 | 2.9635601292  | -3.2036121960 |
| C | 6.0 | -3.1118545262 | 3.5596968402  | -4.5987911585 |
| O | 8.0 | 1.2590505531  | -0.0745454291 | -0.0417539248 |
| C | 6.0 | -0.0654804781 | 1.7115326308  | -0.9229020050 |
| C | 6.0 | 2.5818367482  | -1.9877368118 | 0.3496923243  |
| H | 1.0 | 1.7292322376  | -2.5852797737 | 0.0088829909  |
| C | 6.0 | -5.8584555202 | 3.5212760806  | -5.1557002599 |
| C | 6.0 | 0.5685417370  | 1.1536636825  | 0.3238572730  |
| H | 1.0 | -6.9157573657 | 3.5158021778  | -5.3895936228 |
| C | 6.0 | -2.0063213928 | 2.2904347912  | -2.2907070352 |
| C | 6.0 | -3.9896767943 | 2.8840015792  | -3.6908004986 |
| H | 1.0 | -7.8287229225 | 1.7250331841  | -4.3895308246 |
| N | 7.0 | 3.8785256508  | -4.0764269655 | 0.9595716537  |
| C | 6.0 | -1.4478827310 | 1.6683995786  | -1.1312697360 |
| C | 6.0 | -5.3880263205 | 2.8864143672  | -4.0102847902 |
| H | 1.0 | 2.8567049706  | -0.0386404577 | 1.2643202796  |
| C | 6.0 | 2.0285240681  | -0.6917573848 | 0.9337823211  |
| C | 6.0 | -3.4469735228 | 2.2362358207  | -2.4966991552 |
| H | 1.0 | 4.2615615212  | -2.1707285100 | 1.6892050899  |
| C | 6.0 | 3.3813536770  | -2.7664445700 | 1.4078678290  |
| C | 6.0 | 2.7908657181  | 4.2167950627  | 0.0650642430  |
| H | 1.0 | 4.5007311464  | -3.9352382657 | 0.1654056158  |
| O | 8.0 | -6.2284384769 | 2.2411552481  | -3.1483280281 |
| H | 1.0 | 0.7632189096  | 4.9327986122  | -0.1109294411 |
| H | 1.0 | -0.1991455808 | 0.9053950002  | 1.0593493927  |
| C | 6.0 | -7.6080643794 | 2.2248260390  | -3.4349988301 |
| O | 8.0 | -4.1855831082 | 1.6372000625  | -1.6444741674 |
| O | 8.0 | -2.2405981736 | 1.0581826141  | -0.2307734145 |
| O | 8.0 | 3.7953332882  | 4.6570598440  | 0.6207030353  |
| H | 1.0 | 0.7772702883  | -6.2404840317 | 1.4610431918  |
| H | 1.0 | -3.1776487994 | 1.1714360148  | -0.6267276998 |
| H | 1.0 | -8.0742477651 | 1.6633732374  | -2.6224591965 |
| C | 6.0 | 1.7654845733  | 5.2044120386  | -0.4661911478 |
| H | 1.0 | 2.9754259216  | 6.4500156340  | 0.3166548813  |
| H | 1.0 | -8.0383835833 | 3.2364738473  | -3.4655201221 |
| O | 8.0 | 1.2135253208  | -0.9905414955 | 2.0708982556  |
| H | 1.0 | 2.6737675365  | -5.5263413141 | 2.9287258988  |
| O | 8.0 | 2.0877876436  | 6.5190752457  | -0.0754029407 |

|             |          |   |     |               |               |               |
|-------------|----------|---|-----|---------------|---------------|---------------|
|             |          | C | 6.0 | 2.5526736542  | -2.9425653488 | 2.6931889459  |
|             |          | O | 8.0 | 1.5018722507  | -3.8998584484 | 2.4564411690  |
|             |          | H | 1.0 | 1.5818299074  | -7.9533054949 | 3.0554337350  |
|             |          | H | 1.0 | 1.7350759422  | 5.0980226569  | -1.5630730494 |
|             |          | C | 6.0 | 0.6060224894  | -6.0919218029 | 2.5326240668  |
|             |          | H | 1.0 | 2.8008437457  | -0.9475819394 | 3.3987842527  |
|             |          | C | 6.0 | 1.6534586335  | -5.1308150465 | 3.0867728053  |
|             |          | C | 6.0 | 1.9434450197  | -1.5953531522 | 3.1310075503  |
|             |          | H | 1.0 | 3.2000707598  | -3.3127334457 | 3.4962786768  |
|             |          | H | 1.0 | -0.1699822810 | -8.0797128102 | 2.9594744703  |
|             |          | C | 6.0 | 0.6454885190  | -7.4278091435 | 3.2919347399  |
|             |          | H | 1.0 | -0.3709238887 | -5.6088835165 | 2.6465423769  |
|             |          | H | 1.0 | 2.6344181549  | -6.5682164528 | 5.0724132418  |
|             |          | O | 8.0 | 1.4658823771  | -4.9461892792 | 4.4949803358  |
|             |          | C | 6.0 | 1.0040106953  | -1.7045217962 | 4.3222989417  |
|             |          | H | 1.0 | 0.1566425667  | -2.3432535331 | 4.0685443265  |
|             |          | C | 6.0 | 0.5722068753  | -7.1905807632 | 4.8077134362  |
|             |          | H | 1.0 | 0.6345619066  | -0.7112901947 | 4.5908451215  |
|             |          | C | 6.0 | 1.6205140965  | -6.1567452698 | 5.2252351281  |
|             |          | H | 1.0 | 0.7278663135  | -8.1257655338 | 5.3601219828  |
|             |          | H | 1.0 | 1.5173340402  | -2.1443292162 | 5.1819158915  |
|             |          | H | 1.0 | -0.4206958034 | -6.8103141580 | 5.0775544370  |
|             |          | H | 1.0 | 1.5246818739  | -5.8894344105 | 6.2819768157  |
|             |          | H | 1.0 | 4.2146338889  | -0.5489346461 | -7.4039228016 |
|             |          | O | 8.0 | 2.8543365450  | 1.4861623607  | -6.5798517482 |
|             |          | C | 6.0 | 3.6544015558  | -0.7446755703 | -6.4947278062 |
|             |          | H | 1.0 | 2.2381768659  | 2.0475895715  | -6.0052066677 |
|             |          | H | 1.0 | 4.3043745081  | -2.8008226672 | -6.2913549797 |
|             |          | C | 6.0 | 2.8820860134  | 0.2896091090  | -5.9594473631 |
|             |          | C | 6.0 | 3.7042918726  | -1.9970065183 | -5.8755392675 |
|             |          | O | 8.0 | 1.2918447073  | 2.2915748648  | -4.7827213439 |
|             |          | C | 6.0 | 2.1363107316  | 0.0657318467  | -4.7674007469 |
|             |          | C | 6.0 | 2.9860354069  | -2.2513230518 | -4.7069669988 |
|             |          | C | 6.0 | 1.3395952930  | 1.1460854932  | -4.2196913002 |
|             |          | C | 6.0 | 2.1879579300  | -1.2198851141 | -4.1328928017 |
|             |          | O | 8.0 | 3.0662171356  | -3.4811348903 | -4.1445335503 |
|             |          | H | 1.0 | -5.4810035648 | 2.8526141561  | -2.5910801896 |
|             |          | H | 1.0 | 2.4838831950  | -3.4350791245 | -3.3365863660 |
|             |          | H | 1.0 | -0.2326519594 | 2.8591609681  | -2.9325931476 |
|             |          | C | 6.0 | 0.5883257390  | 0.8848179482  | -2.9981101981 |
|             |          | C | 6.0 | 1.4396269099  | -1.4650320660 | -2.9290360027 |
|             |          | H | 1.0 | -4.3599182339 | 2.3007136717  | -3.8535510831 |
|             |          | C | 6.0 | -0.2030469356 | 1.8990202880  | -2.4275703068 |
| Pyrrromycin | 668-17-7 | H | 1.0 | 4.2146338889  | -0.5489346461 | -7.4039228016 |
|             |          | O | 8.0 | 2.8543365450  | 1.4861623607  | -6.5798517482 |
|             |          | C | 6.0 | 3.6544015558  | -0.7446755703 | -6.4947278062 |
|             |          | H | 1.0 | 2.2381768659  | 2.0475895715  | -6.0052066677 |
|             |          | H | 1.0 | 4.3043745081  | -2.8008226672 | -6.2913549797 |
|             |          | C | 6.0 | 2.8820860134  | 0.2896091090  | -5.9594473631 |
|             |          | C | 6.0 | 3.7042918726  | -1.9970065183 | -5.8755392675 |
|             |          | O | 8.0 | 1.2918447073  | 2.2915748648  | -4.7827213439 |
|             |          | C | 6.0 | 2.1363107316  | 0.0657318467  | -4.7674007469 |
|             |          | C | 6.0 | 2.9860354069  | -2.2513230518 | -4.7069669988 |
|             |          | C | 6.0 | 1.3395952930  | 1.1460854932  | -4.2196913002 |
|             |          | C | 6.0 | 2.1879579300  | -1.2198851141 | -4.1328928017 |
|             |          | O | 8.0 | 3.0662171356  | -3.4811348903 | -4.1445335503 |
|             |          | H | 1.0 | -5.4810035648 | 2.8526141561  | -2.5910801896 |
|             |          | H | 1.0 | 2.4838831950  | -3.4350791245 | -3.3365863660 |
|             |          | H | 1.0 | -0.2326519594 | 2.8591609681  | -2.9325931476 |
|             |          | C | 6.0 | 0.5883257390  | 0.8848179482  | -2.9981101981 |
|             |          | C | 6.0 | 1.4396269099  | -1.4650320660 | -2.9290360027 |
|             |          | H | 1.0 | -4.3599182339 | 2.3007136717  | -3.8535510831 |
|             |          | C | 6.0 | -0.2030469356 | 1.8990202880  | -2.4275703068 |

|   |     |               |               |               |
|---|-----|---------------|---------------|---------------|
| C | 6.0 | -4.7804776245 | 2.0616746329  | -2.8735679923 |
| C | 6.0 | 0.6429422330  | -0.3977307986 | -2.3797880066 |
| O | 8.0 | 1.4753108140  | -2.6310110187 | -2.3389161116 |
| H | 1.0 | -5.2854848628 | 1.0956199516  | -2.9022987545 |
| O | 8.0 | -3.1831240182 | 4.0740788511  | -2.3048528020 |
| C | 6.0 | -2.9663282125 | 3.0318254893  | -1.7226148976 |
| O | 8.0 | -3.7389913769 | 1.9268953367  | -1.8987294283 |
| C | 6.0 | -0.9258598564 | 1.6807851359  | -1.2627855908 |
| C | 6.0 | -0.1012701895 | -0.6052384713 | -1.1810185995 |
| H | 1.0 | -1.2662692999 | 3.7375062245  | -0.7438394099 |
| H | 1.0 | 0.5338128091  | -2.3776606454 | -1.1628250712 |
| C | 6.0 | -1.8255475870 | 2.7986299027  | -0.7377008281 |
| C | 6.0 | -0.8725738968 | 0.4200081572  | -0.6212547466 |
| O | 8.0 | -0.0702441510 | -1.8083266601 | -0.5720628525 |
| H | 1.0 | -4.3148407317 | 3.3453834890  | 0.4507253246  |
| H | 1.0 | -3.5428320224 | 0.8901905483  | 0.3267992115  |
| C | 6.0 | -2.2974244672 | 2.6067550556  | 0.7447299559  |
| H | 1.0 | -3.1127782600 | 4.5899340035  | 0.7620354847  |
| C | 6.0 | -1.5541145393 | 0.1660536002  | 0.6922282863  |
| H | 1.0 | -1.9187472317 | -0.8663536992 | 0.7173866972  |
| C | 6.0 | -3.4432183445 | 3.5903497595  | 1.0693354948  |
| C | 6.0 | -2.7011029190 | 1.1400571019  | 0.9798608424  |
| H | 1.0 | 2.2482673564  | -3.4286319348 | 0.6059061256  |
| O | 8.0 | -1.2091165670 | 2.9715191602  | 1.5948909976  |
| H | 1.0 | 4.0272554912  | -2.8404474938 | 2.4992525594  |
| H | 1.0 | -0.7195506605 | 2.1589891613  | 1.8131948089  |
| O | 8.0 | -0.5265880924 | 0.2973824506  | 1.7369322786  |
| H | 1.0 | 1.7624800626  | -1.3561202562 | 1.8359347755  |
| H | 1.0 | -3.0342815591 | 1.0116852557  | 2.0154563339  |
| C | 6.0 | 1.7120472918  | -3.9230664238 | 1.4359729926  |
| H | 1.0 | 2.0536408153  | -4.9618993925 | 1.4927898328  |
| H | 1.0 | 1.5387845847  | 0.8035297821  | 2.9228421505  |
| C | 6.0 | -3.8464698705 | 3.6298768417  | 2.5462450291  |
| H | 1.0 | 0.6521861605  | -3.9373553860 | 1.1762514737  |
| H | 1.0 | -0.5008155209 | -2.3165618111 | 1.8120263665  |
| C | 6.0 | 3.3207763258  | -3.4131078421 | 3.1326261438  |
| H | 1.0 | -4.5718096943 | 4.4310209624  | 2.7251157162  |
| H | 1.0 | -4.3096407640 | 2.6928348895  | 2.8738584956  |
| H | 1.0 | 3.6044162993  | -4.4681901278 | 3.0604411619  |
| C | 6.0 | 1.4222104358  | -1.8935174026 | 2.7407442318  |
| N | 7.0 | 1.9243904706  | -3.2808257832 | 2.7336869037  |
| C | 6.0 | -0.7143863292 | -0.4900163752 | 2.9082402220  |
| H | 1.0 | -2.9681187142 | 3.8085180512  | 3.1705820746  |
| C | 6.0 | -0.1203252623 | -1.8926983440 | 2.7421238331  |

|               |            |   |     |               |               |               |
|---------------|------------|---|-----|---------------|---------------|---------------|
|               |            | H | 1.0 | 3.4499748158  | -3.1077039206 | 4.1729324827  |
|               |            | H | 1.0 | 3.0142641026  | -0.9509592399 | 3.8895827611  |
|               |            | H | 1.0 | -1.7845782532 | -0.5543959363 | 3.1485387011  |
|               |            | C | 6.0 | 1.2972986466  | 0.3394574685  | 3.8866106789  |
|               |            | C | 6.0 | 1.9266600627  | -1.0622565080 | 3.9429322210  |
|               |            | O | 8.0 | -0.1380993342 | 0.2032450399  | 3.9943770538  |
|               |            | H | 1.0 | 2.8084523543  | 1.4553287759  | 4.9473431118  |
|               |            | H | 1.0 | 1.1939124633  | 2.1976400167  | 4.9730685194  |
|               |            | H | 1.0 | -0.4682530952 | -2.5268863675 | 3.5670718610  |
|               |            | C | 6.0 | 1.7358190512  | 1.2497552508  | 5.0222624695  |
|               |            | O | 8.0 | 1.6613694416  | -1.6777702023 | 5.2022350572  |
|               |            | H | 1.0 | 1.5437252064  | 0.7764312623  | 5.9881996794  |
|               |            | H | 1.0 | 0.7081537423  | -1.5857010641 | 5.3449851198  |
| Rhodomycinone | 21288-60-8 | H | 1.0 | -3.5798127508 | -2.7389638094 | 3.3939182702  |
|               |            | H | 1.0 | -1.8748050815 | -3.2338977143 | 3.4249145850  |
|               |            | C | 6.0 | -2.7969420880 | -3.2645947574 | 2.8388618183  |
|               |            | H | 1.0 | -3.0926092578 | -4.2973137155 | 2.6493432323  |
|               |            | O | 8.0 | -2.0565545199 | -0.7581546991 | 2.6055707731  |
|               |            | H | 1.0 | -2.8886217522 | 1.3186386867  | 1.5255925900  |
|               |            | O | 8.0 | -2.5961312717 | -2.6748384199 | 1.5506353375  |
|               |            | C | 6.0 | -2.1907857012 | -1.3800130962 | 1.5696042178  |
|               |            | H | 1.0 | -4.6118036661 | -0.5961928562 | 1.1234576172  |
|               |            | H | 1.0 | -1.3421857851 | 2.9461967049  | 0.7445570495  |
|               |            | H | 1.0 | -3.7201580174 | 2.1863656412  | 0.2176003004  |
|               |            | C | 6.0 | -2.9058682955 | 1.4916376391  | 0.4455560203  |
|               |            | H | 1.0 | -5.7931202017 | 1.3048065724  | -0.0120663651 |
|               |            | H | 1.0 | -6.6275271825 | -0.2115174773 | -0.3598200462 |
|               |            | C | 6.0 | -1.5941815059 | 2.1530297855  | 0.0283243952  |
|               |            | C | 6.0 | -4.5050641448 | -0.4684677883 | 0.0393977126  |
|               |            | C | 6.0 | -5.6889627326 | 0.3340897881  | -0.5084313772 |
|               |            | O | 8.0 | 0.9248703582  | 3.0736652417  | -0.5012136265 |
|               |            | H | 1.0 | 1.9083730765  | 3.2373090173  | -0.6573187969 |
|               |            | C | 6.0 | -0.4327199935 | 1.1871723144  | -0.0572345067 |
|               |            | C | 6.0 | -1.9791663339 | -0.8386457912 | 0.1607855788  |
|               |            | C | 6.0 | -3.1229246388 | 0.1479727525  | -0.2672647430 |
|               |            | C | 6.0 | 0.8321011465  | 1.7253077944  | -0.3097468666 |
|               |            | C | 6.0 | -0.6033183356 | -0.2075904192 | 0.0330542401  |
|               |            | O | 8.0 | 3.4086615507  | 2.7596617653  | -0.7993845797 |
|               |            | H | 1.0 | 1.2778218991  | -2.7636458729 | 0.0020700969  |
|               |            | H | 1.0 | -4.5210790208 | -1.4741709579 | -0.3979094593 |
|               |            | C | 6.0 | 1.9776645936  | 0.8972025442  | -0.3977722390 |
|               |            | C | 6.0 | 0.5164354997  | -1.0494569720 | -0.0369026843 |
|               |            | C | 6.0 | 3.2740442913  | 1.4705717377  | -0.6462626322 |



|             |            |                                                                                                                                                                                                                                                                                                                                                                                                                                                                                                                                                                                                                                                                                                                                                                                                                                                                                                                                                                                                                                                                                                                                     |
|-------------|------------|-------------------------------------------------------------------------------------------------------------------------------------------------------------------------------------------------------------------------------------------------------------------------------------------------------------------------------------------------------------------------------------------------------------------------------------------------------------------------------------------------------------------------------------------------------------------------------------------------------------------------------------------------------------------------------------------------------------------------------------------------------------------------------------------------------------------------------------------------------------------------------------------------------------------------------------------------------------------------------------------------------------------------------------------------------------------------------------------------------------------------------------|
|             |            | C 6.0 1.8169359700 -0.5146291412 -0.2448716941<br>O 8.0 0.3394671070 -2.3802353454 0.0916706406<br>O 8.0 -1.8220886798 2.7793521454 -1.2637455842<br>H 1.0 -5.5549835645 0.5152447109 -1.5773354404<br>H 1.0 -2.0307921348 -1.6930117961 -0.5184596347<br>H 1.0 4.9930614899 2.8555758240 -1.0276004434<br>O 8.0 2.8110161141 -2.6733310689 -0.1957398167<br>H 1.0 -0.9564657930 3.1481547771 -1.5075673681<br>C 6.0 2.9524744582 -1.4084832637 -0.3241357866<br>C 6.0 4.4138677111 0.5915877744 -0.7195762462<br>H 1.0 -2.5527586574 1.1185580527 -1.8720859705<br>O 8.0 -3.0575422574 0.3061436609 -1.6852833532<br>O 8.0 5.9067653467 2.4516788163 -1.1139241416<br>C 6.0 4.2662576641 -0.8208845356 -0.5608818021<br>C 6.0 5.7206491679 1.1255141233 -0.9562150315<br>C 6.0 5.3978438080 -1.6564679479 -0.6378473946<br>H 1.0 5.2488931344 -2.7230233829 -0.5139030601<br>C 6.0 6.8202751015 0.2734634075 -1.0258000768<br>C 6.0 6.6511382248 -1.1119541527 -0.8658550514<br>H 1.0 7.7982759531 0.7090922468 -1.2055980803<br>H 1.0 7.5216965220 -1.7615983239 -0.9236447805                                                    |
| Steffimycin | 11033-34-4 | H 1.0 0.6997008141 -1.3898606121 -6.0189235730<br>H 1.0 -0.9293033649 -1.2761028831 -5.3033309123<br>H 1.0 -0.3931428112 2.1828641801 -5.7867557754<br>C 6.0 0.1486272521 -1.2075816567 -5.0914552115<br>H 1.0 -0.6885925492 3.7360359739 -4.9538511806<br>H 1.0 -1.8871013519 2.4425251428 -4.8548467421<br>C 6.0 -0.8140753061 2.6540898557 -4.8951632311<br>H 1.0 0.4058234929 -1.9778683416 -4.3573470887<br>O 8.0 0.5010749693 0.0971635371 -4.6619358325<br>H 1.0 1.8793030373 -3.3904390115 0.5963138048<br>H 1.0 1.6868141195 1.8608987722 -4.3157641815<br>C 6.0 -0.0995510298 2.1354296265 -3.6467281116<br>O 8.0 1.2922114988 2.4866360719 -3.6888981082<br>H 1.0 -1.2709452635 0.3185382871 -3.5936652089<br>C 6.0 -0.2112638939 0.6028742781 -3.5264293996<br>H 1.0 1.2243538244 -4.4953510816 1.8302849087<br>H 1.0 1.0523830049 -2.2613905948 -1.3119720919<br>C 6.0 1.0206667389 -3.5929214410 1.2475539820<br>H 1.0 0.8980387956 -2.7390771730 1.9254319586<br>O 8.0 -1.4075572698 3.7844310135 -2.4685820769<br>C 6.0 -0.6634196272 2.8138773097 -2.3737293064<br>C 6.0 -0.0242605716 -2.3355895288 -1.4627283489 |

|   |     |               |               |               |
|---|-----|---------------|---------------|---------------|
| H | 1.0 | 1.3325039938  | -0.4111365229 | -2.4120236596 |
| C | 6.0 | 0.3392230712  | 0.0053769966  | -2.2088542360 |
| O | 8.0 | -0.1623813477 | -3.8519432553 | 0.5010184568  |
| H | 1.0 | -0.6953857546 | -1.8453905922 | 0.5243569812  |
| O | 8.0 | -0.1911063778 | -3.3365304404 | -2.4585836375 |
| O | 8.0 | -0.5620415093 | -1.0983767234 | -1.8752835751 |
| C | 6.0 | -0.7373243105 | -2.7125920004 | -0.1442231388 |
| C | 6.0 | -0.1853088623 | 2.2666366063  | -1.0961474727 |
| H | 1.0 | -2.1655910713 | -4.1136828676 | 1.1956661637  |
| C | 6.0 | 0.4163034148  | 0.9762773935  | -1.0491418454 |
| H | 1.0 | -1.0220120783 | -4.2944702521 | -4.7853123257 |
| C | 6.0 | -1.5533572386 | -3.6601829352 | -2.7853781649 |
| H | 1.0 | -0.9674680209 | -5.5848089348 | -3.5688784055 |
| O | 8.0 | -2.8441313030 | -3.5800602049 | 0.7494312567  |
| H | 1.0 | -0.7105970801 | 4.0444450377  | -0.0072072468 |
| H | 1.0 | -2.0724751706 | -2.7569984467 | -3.1347514003 |
| C | 6.0 | -2.1894782117 | -3.1014237577 | -0.4249857228 |
| C | 6.0 | -1.5177334806 | -4.6967412187 | -3.8969078595 |
| C | 6.0 | -0.2415015002 | 3.0689673259  | 0.0438956075  |
| H | 1.0 | -2.7387137297 | -2.2148673129 | -0.7576392739 |
| H | 1.0 | -1.7205403237 | -5.0614923690 | -1.1715218091 |
| C | 6.0 | -2.2568472236 | -4.1651251433 | -1.5233827532 |
| C | 6.0 | 1.0428550408  | 0.5803798987  | 0.1307095682  |
| O | 8.0 | 1.6942000092  | -0.6064253325 | 0.1686724284  |
| H | 1.0 | -2.5365735124 | -4.9922881117 | -4.1592200319 |
| C | 6.0 | 0.3273074717  | 2.6534248692  | 1.2497417285  |
| H | 1.0 | 2.0617656539  | -0.6690195136 | 1.1127695720  |
| C | 6.0 | 1.0023985951  | 1.3928025332  | 1.3085315253  |
| O | 8.0 | -3.6128255897 | -4.4737608748 | -1.8230108452 |
| H | 1.0 | -4.0490008115 | -4.5092783809 | -0.9574945812 |
| O | 8.0 | -0.3297713489 | 4.6337036068  | 2.3952548391  |
| C | 6.0 | 0.2443947548  | 3.5300555563  | 2.4293686484  |
| C | 6.0 | 1.6100159321  | 0.9324071879  | 2.5226165678  |
| O | 8.0 | 2.2188396797  | -0.2278864652 | 2.5729232377  |
| C | 6.0 | 0.8798014354  | 3.0311220382  | 3.6705135462  |
| C | 6.0 | 1.5375515466  | 1.7679077420  | 3.6975737200  |
| H | 1.0 | 0.3153309867  | 4.7832049589  | 4.7705844401  |
| C | 6.0 | 0.8217594169  | 3.8269699405  | 4.8182733376  |
| H | 1.0 | 2.6987577230  | -0.2427711194 | 4.0983586419  |
| C | 6.0 | 2.1314317886  | 1.3429220408  | 4.9233401366  |
| O | 8.0 | 2.7689263088  | 0.1598546080  | 5.0147136916  |
| C | 6.0 | 1.4096606031  | 3.3874304154  | 6.0019980934  |
| C | 6.0 | 2.0657226497  | 2.1480138333  | 6.0617414108  |
| O | 8.0 | 1.3013261795  | 4.2363868871  | 7.0779897016  |

|               |            |   |     |               |               |               |
|---------------|------------|---|-----|---------------|---------------|---------------|
|               |            | H | 1.0 | 2.5331351479  | 1.7770522856  | 6.9650282438  |
|               |            | C | 6.0 | 1.8831812721  | 3.8382919957  | 8.3024356481  |
|               |            | H | 1.0 | 2.9696928664  | 3.6999529641  | 8.2164268569  |
|               |            | H | 1.0 | 1.4418132965  | 2.9079023947  | 8.6852784291  |
|               |            | H | 1.0 | 1.6822849072  | 4.6451657391  | 9.0109252883  |
|               |            | H | 1.0 | 1.9161156940  | -4.4411386499 | -1.1961864099 |
|               |            | H | 1.0 | 0.6760941659  | -3.3345729949 | -1.8359798265 |
|               |            | H | 1.0 | -5.8797948113 | -1.3282064418 | -0.7122461332 |
|               |            | C | 6.0 | 1.3370818686  | -3.5379932578 | -0.9849150890 |
|               |            | H | 1.0 | 2.0175682418  | -2.6850501516 | -0.8699255876 |
|               |            | O | 8.0 | 0.6043999297  | -3.7953788014 | 0.2069662448  |
|               |            | C | 6.0 | -4.9674454927 | -1.1478239487 | -0.1359996486 |
|               |            | H | 1.0 | -1.1665431835 | -2.1694037879 | -0.9960389273 |
|               |            | H | 1.0 | -4.2192986236 | -1.9048890412 | -0.3928179396 |
|               |            | H | 1.0 | -5.2030120685 | -1.2409939485 | 0.9351453496  |
|               |            | O | 8.0 | -4.5438745513 | 0.1684646552  | -0.4511322122 |
|               |            | H | 1.0 | -3.3964438170 | -5.5312950717 | 0.9617845264  |
|               |            | H | 1.0 | -4.2146770565 | 1.9536128035  | -1.5802090354 |
|               |            | O | 8.0 | -2.3123300943 | -3.2718434094 | 0.2221634143  |
|               |            | H | 1.0 | -1.0656391189 | -5.0276251418 | 1.8964393739  |
|               |            | C | 6.0 | -1.3267192786 | -2.2596871712 | 0.0777996552  |
|               |            | H | 1.0 | -2.2940880526 | -0.3437670345 | -1.2635717488 |
|               |            | C | 6.0 | -0.0223340829 | -2.6499419700 | 0.7949712775  |
|               |            | H | 1.0 | -5.6758658388 | 2.2342485376  | 0.5149562015  |
|               |            | H | 1.0 | 1.3485240258  | -4.0299256270 | 2.1407908126  |
|               |            | H | 1.0 | 0.6607616600  | -1.7934664910 | 0.7579080410  |
|               |            | H | 1.0 | -4.6325869476 | -4.2612445798 | 0.9980162982  |
|               |            | C | 6.0 | -3.7500054012 | -4.6528781928 | 1.5121104232  |
|               |            | O | 8.0 | -3.5927576774 | 2.5770201364  | -1.1741838408 |
|               |            | C | 6.0 | -3.4146322730 | 0.6581994321  | 0.2830329904  |
|               |            | C | 6.0 | -2.6556185622 | -3.5980860192 | 1.5753668560  |
|               |            | C | 6.0 | -1.4130000766 | -4.0831352150 | 2.3449281519  |
|               |            | C | 6.0 | -2.0922144671 | 0.0728638972  | -0.2701322776 |
|               |            | O | 8.0 | -1.7492819034 | -1.0316541451 | 0.6270616798  |
|               |            | C | 6.0 | -0.2812354396 | -3.0448334021 | 2.2561348315  |
|               |            | H | 1.0 | -4.0303390633 | -4.9561799425 | 2.5230135110  |
|               |            | O | 8.0 | 0.9265664447  | -3.5137108860 | 2.8472202338  |
|               |            | C | 6.0 | -4.7813186181 | 2.6911800482  | 0.9455824063  |
|               |            | H | 1.0 | -3.4912470716 | 0.3474254767  | 1.3344135239  |
|               |            | C | 6.0 | -3.5377809288 | 2.1929932047  | 0.2082270020  |
|               |            | O | 8.0 | 0.2775554264  | -0.5132222405 | -1.6514129362 |
|               |            | H | 1.0 | -4.8394772333 | 3.7765486789  | 0.8543210229  |
|               |            | H | 1.0 | -4.7356746712 | 2.4457512070  | 2.0112119055  |
| Steffimycin B | NCI 204856 |   |     |               |               |               |

|             |            |   |     |               |               |               |
|-------------|------------|---|-----|---------------|---------------|---------------|
|             |            | H | 1.0 | -3.0343065454 | -2.7000617149 | 2.0827738234  |
|             |            | H | 1.0 | 1.2179995188  | -0.5652790221 | -2.0305190861 |
|             |            | O | 8.0 | -1.8359082295 | -4.2988536840 | 3.6889394840  |
|             |            | C | 6.0 | -1.0625554432 | -5.2315124117 | 4.4247899431  |
|             |            | H | 1.0 | -0.5912746411 | -2.1557240812 | 2.8138788083  |
|             |            | C | 6.0 | -0.9393223620 | 1.0511876383  | -0.3491363423 |
|             |            | C | 6.0 | 0.2361614445  | 0.6694450589  | -0.9929663260 |
|             |            | C | 6.0 | -2.2614527986 | 2.8628776879  | 0.7753976251  |
|             |            | O | 8.0 | 2.6678025061  | -0.1055648728 | -2.2123263710 |
|             |            | C | 6.0 | -0.9870733948 | 2.3333211945  | 0.2694807638  |
|             |            | C | 6.0 | 1.4070327102  | 1.4922622306  | -0.9623213981 |
|             |            | H | 1.0 | 4.1840356005  | -0.0996193454 | -2.7203596151 |
|             |            | O | 8.0 | -2.3522452763 | 3.8145246019  | 1.5439313369  |
|             |            | C | 6.0 | 2.6155684550  | 1.0492641743  | -1.5936512460 |
|             |            | C | 6.0 | 0.1471549510  | 3.1440422976  | 0.3188959351  |
|             |            | O | 8.0 | 5.0940335468  | 0.3144958344  | -2.8052424844 |
|             |            | C | 6.0 | 1.3472743944  | 2.7457639429  | -0.2742297237 |
|             |            | H | 1.0 | 0.0952561949  | 4.1141070193  | 0.7989861046  |
|             |            | C | 6.0 | 3.7824150310  | 1.8969856921  | -1.5353340182 |
|             |            | C | 6.0 | 5.0015237499  | 1.4908764740  | -2.1555577339 |
|             |            | C | 6.0 | 2.5197116121  | 3.6328471044  | -0.2019287261 |
|             |            | C | 6.0 | 3.7539024838  | 3.1538755638  | -0.8655537489 |
|             |            | C | 6.0 | 6.1318106290  | 2.3082746171  | -2.1043753349 |
|             |            | H | 1.0 | 7.0301194474  | 1.9519081525  | -2.5922646826 |
|             |            | O | 8.0 | 2.4850777784  | 4.7297473761  | 0.3851815297  |
|             |            | C | 6.0 | 4.8936713940  | 3.9621380393  | -0.8220477537 |
|             |            | C | 6.0 | 6.0706611964  | 3.5413067372  | -1.4364273121 |
|             |            | H | 1.0 | 4.8448283256  | 4.9131245793  | -0.3059431369 |
|             |            | H | 1.0 | 8.2518617887  | 3.8912085175  | -3.0351759330 |
|             |            | O | 8.0 | 7.1389768748  | 4.4017304221  | -1.3416230639 |
|             |            | C | 6.0 | 8.3566481294  | 4.0219533542  | -1.9493653464 |
|             |            | H | 1.0 | 8.7578456938  | 3.0924372696  | -1.5227165393 |
|             |            | H | 1.0 | 9.0597754878  | 4.8351341526  | -1.7551381732 |
|             |            | H | 1.0 | -1.5588591136 | -5.3555986778 | 5.3921206772  |
|             |            | H | 1.0 | -0.0364846640 | -4.8834644814 | 4.5766930774  |
|             |            | H | 1.0 | -1.0294234382 | -6.2111176529 | 3.9203370715  |
| Theprubicin | 95343-20-7 | O | 8.0 | -7.7132797762 | -1.7978747173 | -2.9688600426 |
|             |            | H | 1.0 | -7.9219983840 | -2.2683309831 | -2.1412787834 |
|             |            | H | 1.0 | -6.2984912518 | -0.2882247458 | -2.9949257734 |
|             |            | H | 1.0 | -5.7120268138 | -1.8670145023 | -3.5158154449 |
|             |            | C | 6.0 | -6.3877887690 | -1.3666090396 | -2.8017788226 |
|             |            | C | 6.0 | -5.8822664818 | -1.6808564387 | -1.3992615688 |
|             |            | H | 1.0 | -5.4957892610 | 0.7835056257  | -1.0763905190 |

|   |     |               |               |               |
|---|-----|---------------|---------------|---------------|
| H | 1.0 | -3.7520586893 | -0.7439622301 | -2.8588190351 |
| O | 8.0 | -6.6082655120 | -2.3404983641 | -0.6635329093 |
| C | 6.0 | -4.7275530484 | 0.2994542052  | -0.4555032997 |
| H | 1.0 | -3.3154973714 | -2.3421358565 | -2.2510180219 |
| C | 6.0 | -3.4346370648 | -1.2923283141 | -1.9638115391 |
| C | 6.0 | -4.5256901706 | -1.1817479719 | -0.8870914676 |
| H | 1.0 | -5.1498924237 | 0.2898500066  | 0.5552362233  |
| O | 8.0 | -4.8107395428 | 2.8742829939  | 0.4688406778  |
| H | 1.0 | -1.4209036631 | -0.6819358278 | -2.4017705484 |
| H | 1.0 | 6.8345006670  | -3.2870171238 | 0.1715076064  |
| C | 6.0 | -3.4862312135 | 1.1630571998  | -0.4967361185 |
| H | 1.0 | -4.9944848261 | -2.2869737230 | 0.6104138564  |
| H | 1.0 | 5.8996076091  | -2.2011597516 | -1.8340432818 |
| H | 1.0 | -4.6465562346 | 3.8410674501  | 0.7421914393  |
| H | 1.0 | -1.7090094225 | -3.3354476611 | -1.2813504610 |
| C | 6.0 | -2.0890197341 | -0.6854052212 | -1.5337573637 |
| O | 8.0 | -4.1563946848 | -1.9996630834 | 0.2121769653  |
| C | 6.0 | -3.6162906578 | 2.4746524932  | -0.0246519698 |
| O | 8.0 | 4.5522204316  | -3.6113796166 | -1.3437190956 |
| C | 6.0 | -2.2584313202 | 0.7271342621  | -1.0333941500 |
| H | 1.0 | 5.1385876982  | -5.0885475210 | 0.9753064673  |
| H | 1.0 | -0.1694813848 | -4.3794165834 | 0.2649149657  |
| C | 6.0 | 5.2413636093  | -2.4088936299 | -0.9847452619 |
| O | 8.0 | 0.0856212309  | -2.6451825549 | -1.8070140831 |
| C | 6.0 | 6.0368039313  | -2.5452493962 | 0.3101571982  |
| H | 1.0 | 3.6667210084  | -5.2824160671 | -0.7454470558 |
| H | 1.0 | 2.5348318916  | -2.8362114032 | -2.8845001176 |
| O | 8.0 | -1.4476103425 | -1.4396890258 | -0.4819672792 |
| C | 6.0 | -0.9360274139 | -2.7035793722 | -0.8245252365 |
| O | 8.0 | -3.7958113842 | 5.1220256647  | 0.9038199959  |
| H | 1.0 | 6.5160253255  | -1.5875686692 | 0.5457477551  |
| C | 6.0 | -2.5175393955 | 3.3726137765  | -0.0736111813 |
| H | 1.0 | 1.5699835236  | -1.4544438851 | -3.4700061681 |
| C | 6.0 | -0.4243846601 | -3.3327534212 | 0.4688668911  |
| C | 6.0 | 3.7240935544  | -4.2512060821 | -0.3817246628 |
| C | 6.0 | -1.1633462032 | 1.6041783461  | -1.0977637883 |
| C | 6.0 | 4.3888042964  | -4.2871679776 | 1.0146732100  |
| C | 6.0 | -2.6781531260 | 4.7196349936  | 0.4183262858  |
| H | 1.0 | -1.2109201924 | -3.3041342070 | 1.2262016243  |
| C | 6.0 | 2.1494023894  | -1.8470352636 | -2.6304402710 |
| H | 1.0 | 4.5418161735  | -1.5670305129 | -0.9040461010 |
| O | 8.0 | 2.3639278388  | -3.8686834980 | -0.4114822229 |
| H | 1.0 | 5.6607000949  | -3.1675928678 | 2.3651321861  |
| C | 6.0 | 5.1024472599  | -2.9965094187 | 1.4370677396  |

|            |            |   |     |               |               |               |
|------------|------------|---|-----|---------------|---------------|---------------|
|            |            | H | 1.0 | 1.5854713463  | -4.1533798434 | 2.0426388211  |
|            |            | C | 6.0 | -1.2756632788 | 2.9397914358  | -0.6198288181 |
|            |            | C | 6.0 | 1.2537784893  | -1.9048479231 | -1.4035201290 |
|            |            | O | 8.0 | -0.0023774298 | 1.1738234257  | -1.6360006638 |
|            |            | H | 1.0 | 3.6408523099  | -4.5918003493 | 1.7502724089  |
|            |            | H | 1.0 | -2.6695000751 | 7.1889056544  | 1.2398340387  |
|            |            | C | 6.0 | 1.8894078303  | -2.5324661809 | -0.1434383111 |
|            |            | H | 1.0 | 2.9940504458  | -1.1720515741 | -2.4626776768 |
|            |            | C | 6.0 | -1.5313811320 | 5.6127474119  | 0.3468606861  |
|            |            | C | 6.0 | 0.8204795871  | -2.5992960532 | 0.9803749414  |
|            |            | H | 1.0 | 0.9488204591  | -0.8854610904 | -1.1367550285 |
|            |            | H | 1.0 | 4.3761110677  | -2.2034064082 | 1.6523405672  |
|            |            | H | 1.0 | 0.6065861888  | 2.0039917366  | -1.5708018645 |
|            |            | N | 7.0 | 1.2547510623  | -3.2109126810 | 2.2389085857  |
|            |            | C | 6.0 | -1.6971760030 | 6.9274145715  | 0.8385822928  |
|            |            | C | 6.0 | -0.1243765202 | 3.8272099482  | -0.7069833861 |
|            |            | C | 6.0 | -0.2755528616 | 5.1882764352  | -0.2009660968 |
|            |            | H | 1.0 | 2.7113335476  | -1.8867128079 | 0.1880103404  |
|            |            | O | 8.0 | 0.9671043461  | 3.3951434245  | -1.2168174939 |
|            |            | H | 1.0 | 2.0440786723  | -2.6982918541 | 2.6278109696  |
|            |            | H | 1.0 | 0.5326066900  | -1.5648322898 | 1.1993094254  |
|            |            | C | 6.0 | -0.6542345673 | 7.8232774721  | 0.8008381512  |
|            |            | H | 1.0 | -0.7807195904 | 8.8347576955  | 1.1797389815  |
|            |            | C | 6.0 | 0.7866504097  | 6.1530705187  | -0.2222436913 |
|            |            | C | 6.0 | 0.5943369168  | 7.4397900198  | 0.2695633669  |
|            |            | O | 8.0 | 1.9848335707  | 5.7518949922  | -0.7423523403 |
|            |            | H | 1.0 | 1.4021327359  | 8.1607246491  | 0.2499566639  |
|            |            | H | 1.0 | 2.8086171514  | 7.5583216945  | -1.3944009590 |
|            |            | C | 6.0 | 3.0471538352  | 6.6767183825  | -0.7817412145 |
|            |            | H | 1.0 | 3.8878808664  | 6.1457834547  | -1.2337182645 |
|            |            | H | 1.0 | 3.3375074196  | 7.0200409028  | 0.2219810166  |
|            |            | H | 1.0 | 8.1369788006  | 3.3604537528  | -2.2701151557 |
|            |            | C | 6.0 | 7.3008110188  | 2.6769080710  | -2.1426975378 |
|            |            | H | 1.0 | 8.3392784316  | 1.0417975387  | -3.0879474359 |
|            |            | H | 1.0 | 6.0200983938  | 4.1073949778  | -1.1578058899 |
|            |            | C | 6.0 | 7.4180465837  | 1.3530313625  | -2.6112703682 |
|            |            | C | 6.0 | 6.1427998142  | 3.0970477668  | -1.5303511432 |
|            |            | H | 1.0 | 8.5086349670  | -1.1850737774 | -2.8407700996 |
|            |            | H | 1.0 | 7.8680669809  | -0.6947109976 | -4.4324586748 |
|            |            | C | 6.0 | 7.6447337683  | -1.2612862396 | -3.5168057481 |
|            |            | C | 6.0 | 6.3646204449  | 0.4559523346  | -2.4629800509 |
|            |            | C | 6.0 | 5.0573453585  | 2.2073606991  | -1.3641770423 |
|            |            | O | 8.0 | 3.8068437836  | 3.9363634129  | -0.3042227320 |
| Valrubicin | 56124-62-0 | H | 1.0 | 8.1369788006  | 3.3604537528  | -2.2701151557 |
|            |            | C | 6.0 | 7.3008110188  | 2.6769080710  | -2.1426975378 |
|            |            | H | 1.0 | 8.3392784316  | 1.0417975387  | -3.0879474359 |
|            |            | H | 1.0 | 6.0200983938  | 4.1073949778  | -1.1578058899 |
|            |            | C | 6.0 | 7.4180465837  | 1.3530313625  | -2.6112703682 |
|            |            | C | 6.0 | 6.1427998142  | 3.0970477668  | -1.5303511432 |
|            |            | H | 1.0 | 8.5086349670  | -1.1850737774 | -2.8407700996 |
|            |            | H | 1.0 | 7.8680669809  | -0.6947109976 | -4.4324586748 |
|            |            | C | 6.0 | 7.6447337683  | -1.2612862396 | -3.5168057481 |
|            |            | C | 6.0 | 6.3646204449  | 0.4559523346  | -2.4629800509 |
|            |            | C | 6.0 | 5.0573453585  | 2.2073606991  | -1.3641770423 |
|            |            | O | 8.0 | 3.8068437836  | 3.9363634129  | -0.3042227320 |

|   |     |               |               |               |
|---|-----|---------------|---------------|---------------|
| H | 1.0 | 7.4866939450  | -2.3101888695 | -3.7767439219 |
| O | 8.0 | 6.4498165252  | -0.8337407703 | -2.9036633261 |
| C | 6.0 | 5.1396426734  | 0.8554531743  | -1.8321432122 |
| C | 6.0 | 3.8644545159  | 2.7177830569  | -0.7055320904 |
| H | 1.0 | 2.3915695802  | 3.9649567519  | 0.2866523798  |
| C | 6.0 | 4.0030549151  | -0.0481627291 | -1.6587575232 |
| C | 6.0 | 2.7551035845  | 1.8150436474  | -0.5184141991 |
| O | 8.0 | 1.4880013446  | 3.5670559706  | 0.5440978942  |
| O | 8.0 | 4.0138497926  | -1.2545978997 | -2.0776803046 |
| C | 6.0 | 2.8216253173  | 0.4696326870  | -0.9813314326 |
| C | 6.0 | 1.5753573055  | 2.2826469940  | 0.1216443420  |
| C | 6.0 | 1.6984253356  | -0.3883333504 | -0.7887687046 |
| C | 6.0 | 0.4899293506  | 1.4229311530  | 0.3156154657  |
| H | 1.0 | 2.6488711517  | -1.7278900852 | -1.6784920563 |
| H | 1.0 | -0.7982065823 | 3.0458168440  | 0.8364725581  |
| H | 1.0 | -3.2486467158 | 7.1447641133  | -0.0442946794 |
| H | 1.0 | -0.7745173733 | 1.7777815285  | 2.0485716041  |
| H | 1.0 | -2.7709455626 | 5.8952483954  | 1.1207182374  |
| C | 6.0 | 0.5479909760  | 0.0832414031  | -0.1308794498 |
| O | 8.0 | 1.7220124843  | -1.6512251855 | -1.2480302171 |
| C | 6.0 | -0.7622385852 | 1.9609052181  | 0.9642090237  |
| C | 6.0 | -3.3758721122 | 6.0940444296  | 0.2285615034  |
| H | 1.0 | -5.2864226411 | 7.6965416735  | 1.4454932184  |
| O | 8.0 | -2.5817655518 | 5.6796399930  | -2.0292175167 |
| H | 1.0 | -4.8112793783 | 6.4459731164  | 2.5818125390  |
| C | 6.0 | -2.8333433041 | 5.2695973673  | -0.9197568201 |
| H | 1.0 | -1.1361841736 | 3.3373843317  | -1.7877620347 |
| C | 6.0 | -5.4114902744 | 6.6310501168  | 1.6809401482  |
| O | 8.0 | -0.2012203963 | -1.9416322166 | 0.9118048431  |
| H | 1.0 | 0.7699909882  | -4.0592101573 | 1.7248252216  |
| O | 8.0 | -2.6889060118 | 3.9665404831  | -0.5555072040 |
| C | 6.0 | -0.6250283897 | -0.8572993963 | 0.0230315520  |
| C | 6.0 | -2.0116884051 | 1.2844489128  | 0.3898487264  |
| C | 6.0 | -4.8572205099 | 5.7896795365  | 0.5253024425  |
| C | 6.0 | -2.1779718524 | 3.0719520326  | -1.5723909402 |
| H | 1.0 | -0.5428085744 | -3.7312082397 | 2.8565743086  |
| H | 1.0 | -1.8986437029 | -0.3712158659 | 1.6928118313  |
| H | 1.0 | -3.2111689432 | 2.6848987436  | 1.0037550244  |
| H | 1.0 | -0.8353003749 | -1.3049010483 | -0.9507111846 |
| C | 6.0 | -2.2271640326 | 1.6138333171  | -1.1042152440 |
| C | 6.0 | -1.9048783343 | -0.2206769750 | 0.6082594474  |
| H | 1.0 | -5.4501956526 | 5.9739821841  | -0.3802254463 |
| C | 6.0 | -0.3176119324 | -4.0848102269 | 1.8471596191  |
| H | 1.0 | -7.2527820163 | 6.9524952641  | 2.8083494613  |

|                        |            |   |     |               |               |               |
|------------------------|------------|---|-----|---------------|---------------|---------------|
|                        |            | H | 1.0 | 0.9187741347  | -5.1675956792 | -0.4374684086 |
|                        |            | O | 8.0 | -3.2096673221 | 1.7181100882  | 1.0607334102  |
|                        |            | H | 1.0 | -4.9715372042 | 4.7239504607  | 0.7579960711  |
|                        |            | H | 1.0 | 0.8392397781  | -6.7330020829 | 2.0272459479  |
|                        |            | C | 6.0 | -0.9021174049 | -3.1219700193 | 0.8103006813  |
|                        |            | C | 6.0 | -6.8853123098 | 6.3402212708  | 1.9783696924  |
|                        |            | O | 8.0 | -2.4447030078 | 0.7624793359  | -1.9440086625 |
|                        |            | H | 1.0 | -2.7605212731 | 3.1714995272  | -2.4892143711 |
|                        |            | O | 8.0 | 0.4366634896  | -7.8786973715 | 4.1838069261  |
|                        |            | O | 8.0 | -0.7504703649 | -3.6653883206 | -0.5155233271 |
|                        |            | H | 1.0 | -7.5145630200 | 6.5496868288  | 1.1058748176  |
|                        |            | N | 7.0 | -0.0488183013 | -6.4788736796 | 2.4491008326  |
|                        |            | H | 1.0 | -2.7969020454 | -0.7063705152 | 0.2038324516  |
|                        |            | H | 1.0 | -7.0346995451 | 5.2888955736  | 2.2482773375  |
|                        |            | O | 8.0 | 0.6256660667  | -6.0674569097 | -0.2100594727 |
|                        |            | C | 6.0 | -0.3049999440 | -7.0814555692 | 3.6308205379  |
|                        |            | H | 1.0 | -1.9900707212 | -2.9816558571 | 0.9730383267  |
|                        |            | C | 6.0 | -0.8322748662 | -5.5242668290 | 1.6617200079  |
|                        |            | F | 9.0 | -1.8060869166 | -5.3953090759 | 4.4785831913  |
|                        |            | H | 1.0 | -0.4433333624 | -5.3876747145 | -2.5326857820 |
|                        |            | C | 6.0 | -0.7387917579 | -5.9437584411 | 0.1783005483  |
|                        |            | C | 6.0 | -1.4530815095 | -4.8925110406 | -0.6871188715 |
|                        |            | H | 1.0 | -1.8793323327 | -5.5916327370 | 1.9646057807  |
|                        |            | C | 6.0 | -1.6592406317 | -6.7298295426 | 4.3019119230  |
|                        |            | F | 9.0 | -1.7589895161 | -7.3155436976 | 5.4950279226  |
|                        |            | C | 6.0 | -1.4613366111 | -5.2234542091 | -2.1723304669 |
|                        |            | H | 1.0 | -1.9009271088 | -4.3957844684 | -2.7337786275 |
|                        |            | H | 1.0 | -2.4922654528 | -4.7859358572 | -0.3269392497 |
|                        |            | H | 1.0 | -1.1944184205 | -6.9327322120 | 0.0516824743  |
|                        |            | F | 9.0 | -2.7029425440 | -7.1512503506 | 3.5429191823  |
|                        |            | H | 1.0 | -2.0465883771 | -6.1298337594 | -2.3589932263 |
| Zorubicin / Rubidazone | 36508-71-1 | H | 1.0 | 8.3869901817  | 5.4407643304  | 1.1864420291  |
|                        |            | H | 1.0 | 9.1634838822  | 5.7605182617  | 3.5253581246  |
|                        |            | C | 6.0 | 7.9028484052  | 4.9072977864  | 1.9994655224  |
|                        |            | H | 1.0 | 6.5388198749  | 3.8838965979  | 0.6945655136  |
|                        |            | C | 6.0 | 8.3427293931  | 5.0814688720  | 3.3120900678  |
|                        |            | H | 1.0 | 2.6710974887  | 4.3047987316  | -0.2822719575 |
|                        |            | C | 6.0 | 6.8468819750  | 4.0372561798  | 1.7248257422  |
|                        |            | H | 1.0 | 3.8932958490  | 3.3428786780  | -1.1389323984 |
|                        |            | H | 1.0 | 2.2131934776  | 3.3170072339  | -1.6858682205 |
|                        |            | C | 6.0 | 2.8485736276  | 3.3539681338  | -0.8026797565 |
|                        |            | H | 1.0 | -3.3864585246 | 3.6958354992  | 0.0645745494  |
|                        |            | H | 1.0 | 4.4478276178  | 3.5096747772  | 0.9636387049  |



|   |     |               |               |               |
|---|-----|---------------|---------------|---------------|
| C | 6.0 | 7.7321811282  | 4.3708319912  | 4.3488940454  |
| H | 1.0 | -0.0330275320 | 2.9992666613  | -0.6177502856 |
| O | 8.0 | -2.4038988397 | 3.4315297444  | 0.0561425331  |
| C | 6.0 | 6.2197670687  | 3.3328831385  | 2.7624195881  |
| H | 1.0 | 8.0766228905  | 4.4973931326  | 5.3713409202  |
| N | 7.0 | 4.3230930389  | 2.6204532520  | 1.4327327644  |
| O | 8.0 | -4.9069051848 | 3.4259828793  | 0.1127332180  |
| C | 6.0 | 6.6839307611  | 3.4965739762  | 4.0742096007  |
| C | 6.0 | 2.5514431450  | 2.1694564610  | 0.0905377059  |
| H | 1.0 | 0.8153110543  | 0.3819934275  | -1.8736153192 |
| H | 1.0 | 0.1891821008  | 2.6269341043  | 1.0790055489  |
| C | 6.0 | 5.0841546153  | 2.3608653575  | 2.5532704744  |
| C | 6.0 | 0.0555831941  | 2.1672885493  | 0.0879589181  |
| H | 1.0 | -7.2726220255 | 3.2330585324  | 0.1901218763  |
| N | 7.0 | 3.2432796728  | 1.8302636671  | 1.1178759706  |
| C | 6.0 | -2.4370516382 | 2.0787732581  | 0.1019317420  |
| C | 6.0 | 1.3175696602  | 1.3393790141  | -0.2505252785 |
| O | 8.0 | 1.4185405483  | 1.1186939376  | -1.6680275082 |
| C | 6.0 | -4.9092830570 | 2.1432939525  | 0.1753421786  |
| H | 1.0 | 6.2055326220  | 2.9214350500  | 4.8596438946  |
| C | 6.0 | -1.2308071941 | 1.3702524846  | 0.0926033448  |
| C | 6.0 | -7.3605764349 | 2.1543526568  | 0.2491507057  |
| O | 8.0 | 4.8790980270  | 1.4405368417  | 3.3282091633  |
| C | 6.0 | -3.6785448761 | 1.3898415758  | 0.1705498776  |
| H | 1.0 | -9.5020134735 | 2.0962225732  | 0.3162085742  |
| C | 6.0 | -6.1614079287 | 1.4056304517  | 0.2520858992  |
| C | 6.0 | -8.5792391841 | 1.5205292702  | 0.3187501240  |
| H | 1.0 | 1.2140389428  | 0.1947707667  | 1.5827504707  |
| C | 6.0 | 1.2627512997  | 0.0028998901  | 0.5068278800  |
| C | 6.0 | -1.2431559345 | -0.0397952547 | 0.1538069255  |
| H | 1.0 | 2.1895473772  | -0.5533260228 | 0.3377622334  |
| C | 6.0 | -3.6964087872 | -0.0328049532 | 0.2478542733  |
| C | 6.0 | 0.0382881248  | -0.8250645942 | 0.0981165508  |
| C | 6.0 | -6.1925140162 | -0.0256609491 | 0.3293874049  |
| O | 8.0 | 0.1910462889  | -1.2858601799 | -1.3029910374 |
| C | 6.0 | -2.4598781633 | -0.7395282127 | 0.2380863811  |
| H | 1.0 | 1.8453614510  | -1.5704075789 | -3.3477506825 |
| C | 6.0 | -8.6468705055 | 0.1143018764  | 0.3939568331  |
| C | 6.0 | -4.9419390669 | -0.7832123592 | 0.3349721755  |
| C | 6.0 | -7.4830851197 | -0.6481402389 | 0.3996076031  |
| H | 1.0 | -0.0518688799 | -1.7248777485 | 0.7108516081  |
| H | 1.0 | -9.6165037891 | -0.3649357784 | 0.4475196359  |
| H | 1.0 | 2.0052738372  | -2.2219413644 | -0.9625928780 |
| C | 6.0 | 1.3249149055  | -2.4740950026 | -3.0070599092 |

|   |     |               |               |               |
|---|-----|---------------|---------------|---------------|
| H | 1.0 | 0.3632117186  | -2.5309326872 | -3.5280329148 |
| C | 6.0 | 1.0521452287  | -2.3585902079 | -1.5084118331 |
| O | 8.0 | -2.4358729741 | -2.0803482114 | 0.3206654700  |
| H | 1.0 | 2.6647014784  | -3.0925281868 | -5.1732442200 |
| O | 8.0 | -4.9082298772 | -2.0574148910 | 0.4128647300  |
| O | 8.0 | -7.5167231462 | -2.0122954271 | 0.4706509374  |
| H | 1.0 | -3.4264568068 | -2.3321135178 | 0.3752194693  |
| H | 1.0 | 3.1361327251  | -3.6106607062 | -2.7825241072 |
| N | 7.0 | 2.3161282699  | -3.9441799962 | -4.7374324891 |
| C | 6.0 | 2.1608805715  | -3.7239785251 | -3.2922025077 |
| O | 8.0 | 0.4299669816  | -3.5431612662 | -1.0193189119 |
| H | 1.0 | -9.3859885207 | -2.4514076523 | -0.3540101348 |
| H | 1.0 | -9.3411186975 | -2.3654321691 | 1.4272689125  |
| C | 6.0 | -8.7689038855 | -2.6546057390 | 0.5335232096  |
| H | 1.0 | 3.0422228804  | -4.6448560640 | -4.8733052992 |
| H | 1.0 | 2.2047948253  | -4.5739004878 | -0.6706399119 |
| C | 6.0 | 1.2277070476  | -4.7140571962 | -1.1686986666 |
| C | 6.0 | 1.4881038857  | -4.9493118594 | -2.6649654977 |
| H | 1.0 | 0.5187744241  | -5.1036526147 | -3.1590322394 |
| H | 1.0 | -8.5530118334 | -3.7243242575 | 0.5799080817  |
| H | 1.0 | 2.0357020214  | -6.5515281888 | -3.6294046976 |
| O | 8.0 | 2.3204338327  | -6.1098117834 | -2.8211145667 |
| H | 1.0 | 0.3371236658  | -5.6482811715 | 0.5591483359  |
| C | 6.0 | 0.4800507303  | -5.8590501302 | -0.5036957247 |
| H | 1.0 | -0.5078425086 | -5.9771182274 | -0.9598800241 |
| H | 1.0 | 1.0412649431  | -6.7896781281 | -0.6172570635 |

8. Optimized 3D chemical structures of anthracycline's semiquinone free radicals. (Note that  $>C=O$  rather than  $>C-O$  in quinone moieties appears because the software only reads the Cartesian coordinates to give the pictures.)

| Name                              | NSC No. / CAS No. | 3D chemical structures                                                                                                                                                                                                                                                                                                                                                                                                                            |
|-----------------------------------|-------------------|---------------------------------------------------------------------------------------------------------------------------------------------------------------------------------------------------------------------------------------------------------------------------------------------------------------------------------------------------------------------------------------------------------------------------------------------------|
| 3'-Acetoxy-4'-O-acetyldoxorubicin | 73113-92-5        | 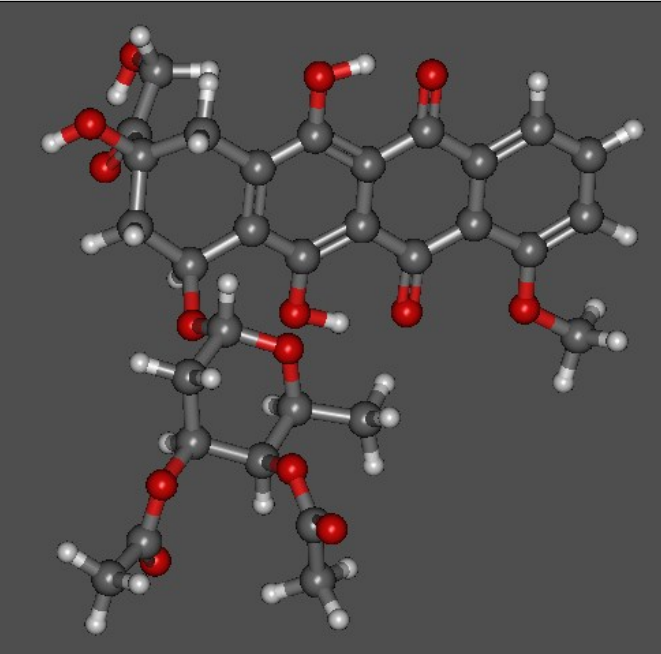 A 3D ball-and-stick model of the molecule 3'-Acetoxy-4'-O-acetyldoxorubicin. The structure features a central anthracycline core with two acetoxy groups attached to the 3' and 4' positions of the aglycone moiety. The atoms are represented by spheres: carbon (grey), oxygen (red), and hydrogen (white). The model is set against a dark grey background. |

Aclacinomycin X

NSC 670120

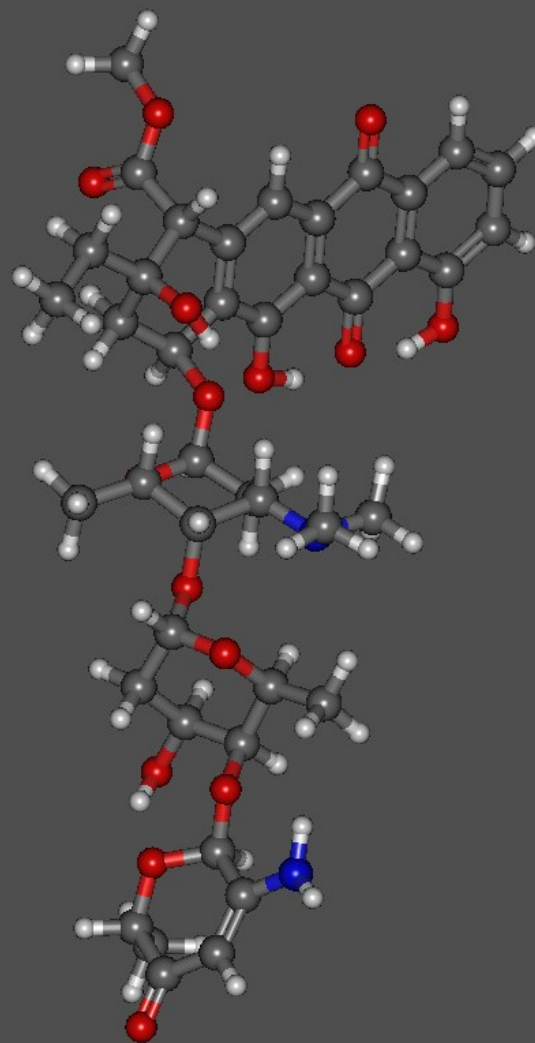

Aclarubicin

57576-44-0

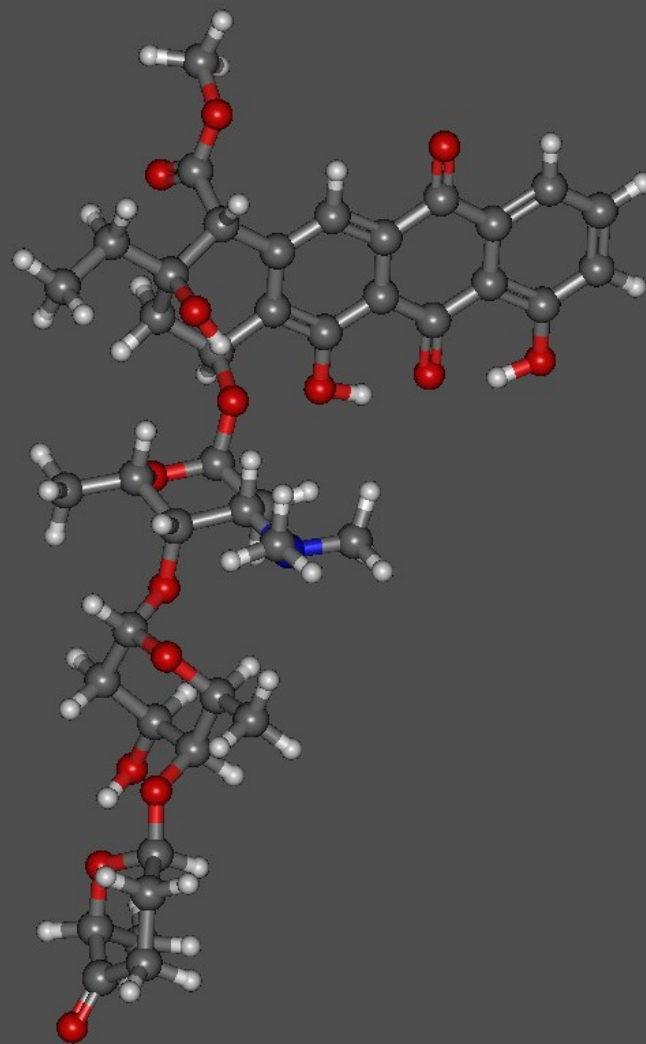

Adriamycin 14-octanoate

51898-39-6

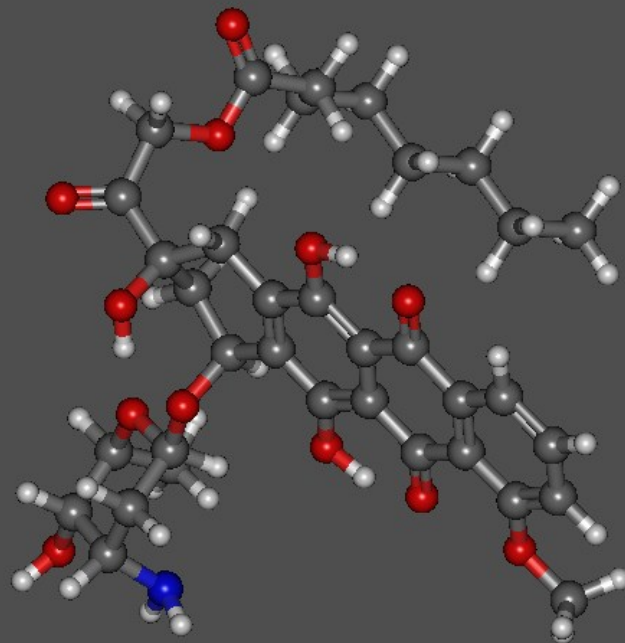

|                                     |                   |  |                                                                                                                                                                                                                                                                                                                                        |  |
|-------------------------------------|-------------------|--|----------------------------------------------------------------------------------------------------------------------------------------------------------------------------------------------------------------------------------------------------------------------------------------------------------------------------------------|--|
| <p>Aklavin</p>                      | <p>60504-57-6</p> |  | 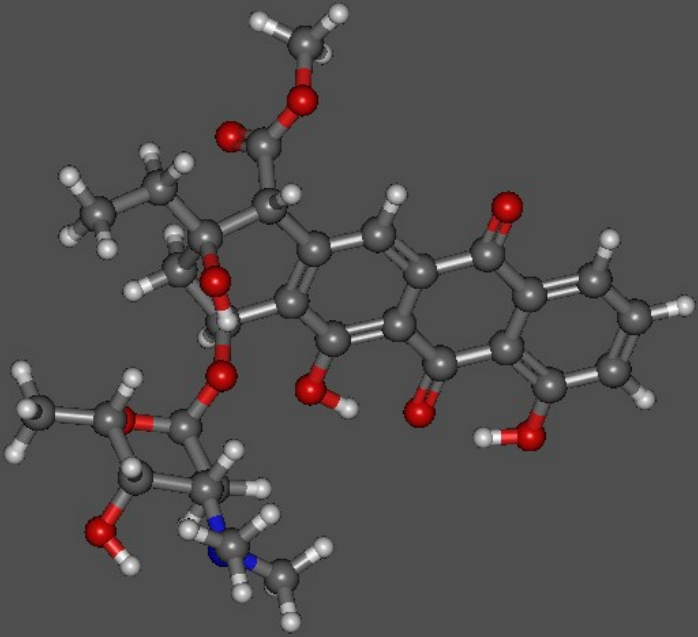 A 3D ball-and-stick model of the molecule Aklavin. The structure features a complex polycyclic core with several hydroxyl groups (red and white) and a nitrogen atom (blue) in a ring system. The model is rendered against a dark gray background. |  |
| <p>2'-Bromo-4'-epi-daunorubicin</p> | <p>NSC 650931</p> |  |  A 3D ball-and-stick model of the molecule 2'-Bromo-4'-epi-daunorubicin. The structure is similar to Aklavin but includes a bromine atom (dark red) at the 2' position. The model is rendered against a dark gray background.                       |  |

Cinerubin A

NSC 243022 /  
34044-10-5

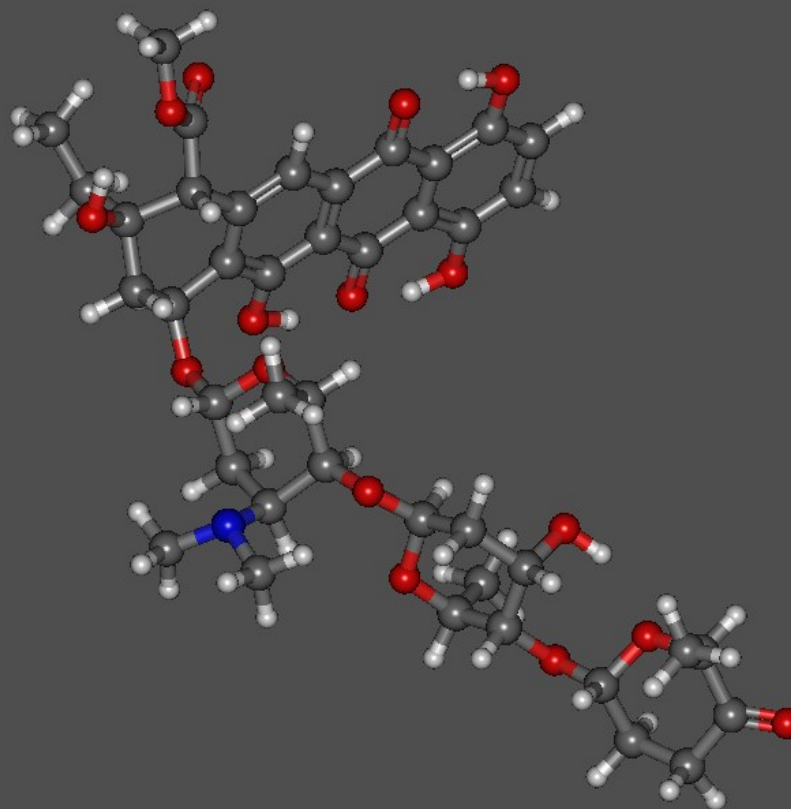



|                                                   |                   |  |                                                                                                                                                                                                                                                                                                                                                           |  |
|---------------------------------------------------|-------------------|--|-----------------------------------------------------------------------------------------------------------------------------------------------------------------------------------------------------------------------------------------------------------------------------------------------------------------------------------------------------------|--|
| <p>N-(1-Cyano-2-methoxyethyl)<br/>doxorubicin</p> | <p>NSC 639659</p> |  | 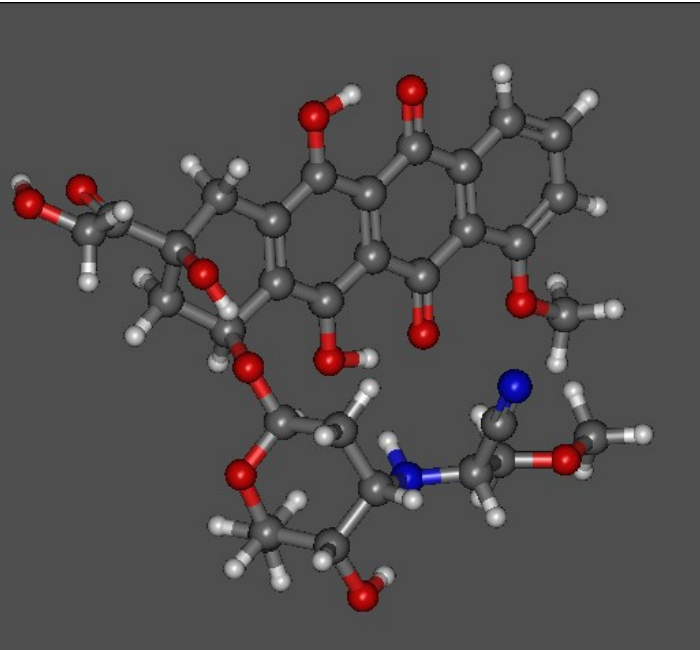 A 3D ball-and-stick model of N-(1-Cyano-2-methoxyethyl)doxorubicin. The molecule features a central anthracycline core with a cyanoethyl side chain and a methoxy group. The atoms are color-coded: carbon (grey), oxygen (red), hydrogen (white), and nitrogen (blue). |  |
| <p>Cyanomorpholino doxorubicin</p>                | <p>88254-07-3</p> |  |  A 3D ball-and-stick model of Cyanomorpholino doxorubicin. The molecule features a central anthracycline core with a cyanomorpholino side chain. The atoms are color-coded: carbon (grey), oxygen (red), hydrogen (white), and nitrogen (blue).                        |  |

Daunomycin 3,4-  
dichlorobenzoyl hydrazone

66996-54-1

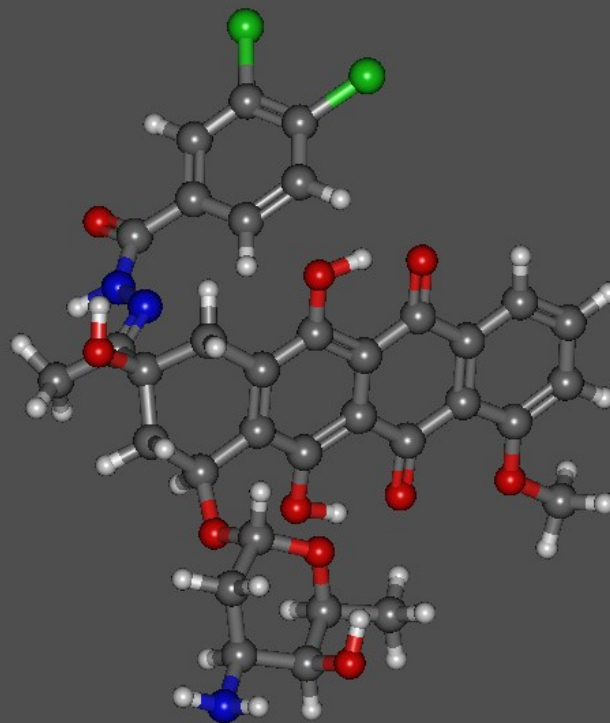

|                                           |                   |  |                                                                                                                                                                                                                                                                                                                                                                                                   |  |
|-------------------------------------------|-------------------|--|---------------------------------------------------------------------------------------------------------------------------------------------------------------------------------------------------------------------------------------------------------------------------------------------------------------------------------------------------------------------------------------------------|--|
| <p>Daunomycin 4-nitrobenzoylhydrazone</p> | <p>66996-56-3</p> |  | 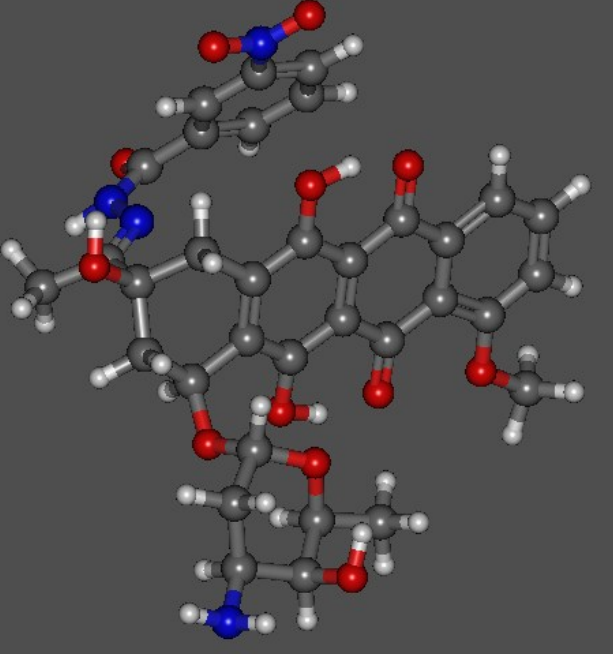 A 3D ball-and-stick model of Daunomycin 4-nitrobenzoylhydrazone. The molecule features a complex polycyclic core with multiple hydroxyl groups (red and white spheres) and a 4-nitrobenzoylhydrazone group (blue and red spheres) attached to the structure. The model is set against a dark gray background. |  |
| <p>Daunomycin 3-oxime</p>                 | <p>34610-60-1</p> |  |  A 3D ball-and-stick model of Daunomycin 3-oxime. The molecule features a complex polycyclic core with multiple hydroxyl groups (red and white spheres) and an oxime group (blue and red spheres) attached to the structure. The model is set against a dark gray background.                                 |  |

|                                                |                                    |                                                                                                                                                                                                                                                                                                                                                                                                                                                                                                               |
|------------------------------------------------|------------------------------------|---------------------------------------------------------------------------------------------------------------------------------------------------------------------------------------------------------------------------------------------------------------------------------------------------------------------------------------------------------------------------------------------------------------------------------------------------------------------------------------------------------------|
| <p>Daunorubicin / Daunomycin</p>               | <p>20830-81-3 /<br/>23541-50-6</p> | 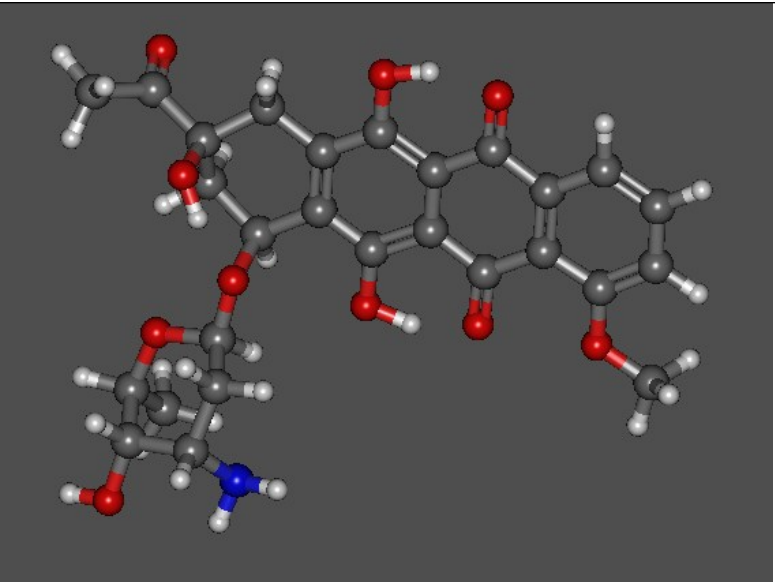 A 3D ball-and-stick model of Daunorubicin / Daunomycin. The molecule features a tetracyclic core with a quinone ring system. It has a glycosidic linkage to a D-glucopyranose sugar at the C-10 position and a dimethylamino group at the C-14 position. The model uses grey for carbon, red for oxygen, white for hydrogen, and blue for nitrogen.                                                                         |
| <p>4-Demethoxyadriamycin /<br/>Medorubicin</p> | <p>64363-63-9</p>                  |  A 3D ball-and-stick model of 4-Demethoxyadriamycin / Medorubicin. The structure is very similar to Daunorubicin, but it lacks the methoxy group at the C-4 position of the quinone ring. It also features a glycosidic linkage to a D-glucopyranose sugar at the C-10 position and a dimethylamino group at the C-14 position. The model uses grey for carbon, red for oxygen, white for hydrogen, and blue for nitrogen. |

N,N-dibenzyl-daunorubicin

70878-51-2

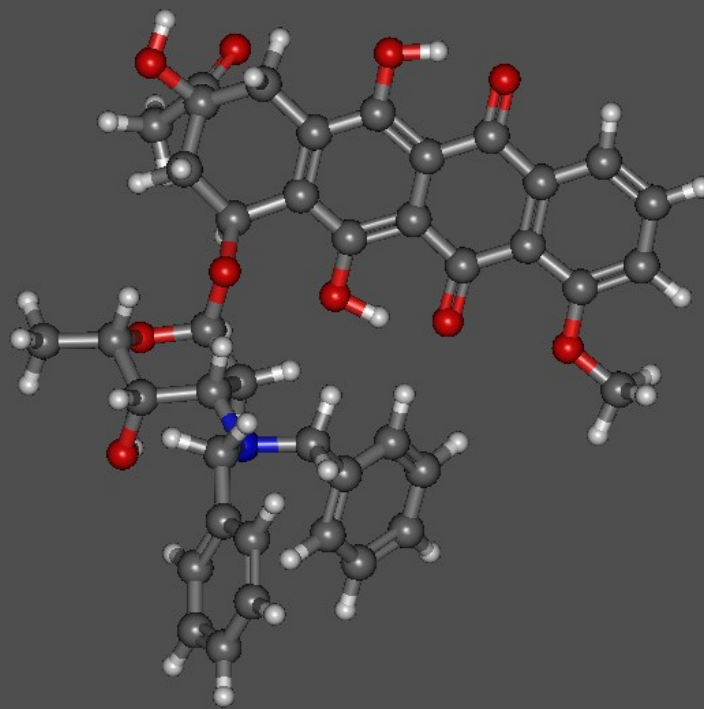

N,N-diethyladriamycin

70844-09-6

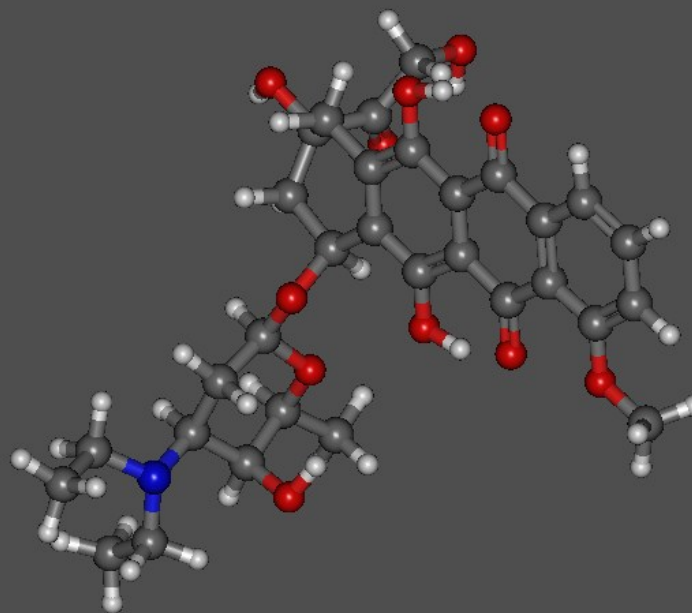

|                               |                   |  |                                                                                                                                                                                                                                                                                                                                                                                                                                                          |  |
|-------------------------------|-------------------|--|----------------------------------------------------------------------------------------------------------------------------------------------------------------------------------------------------------------------------------------------------------------------------------------------------------------------------------------------------------------------------------------------------------------------------------------------------------|--|
| <p>N,N-dimethyladriamycin</p> | <p>67106-76-7</p> |  | 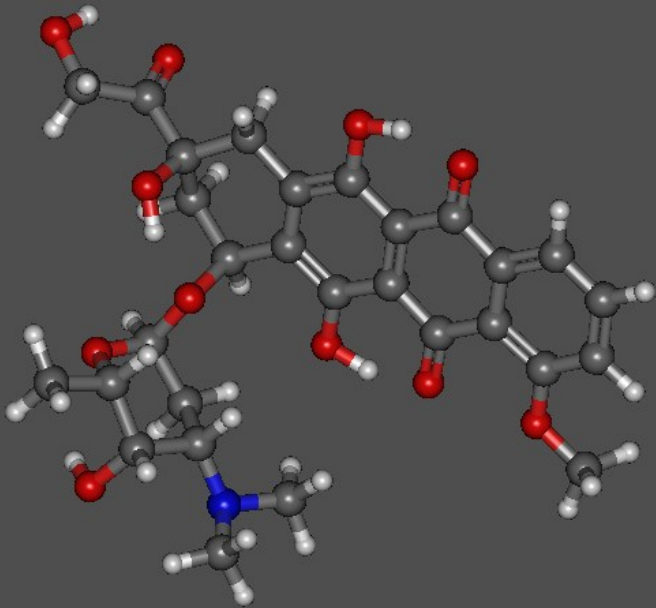 <p>A 3D ball-and-stick model of N,N-dimethyladriamycin. The molecule features a complex polycyclic core with a central nitrogen atom (blue) bonded to two methyl groups (grey and white). It has multiple hydroxyl groups (red and white) and a dimethylamino group (blue nitrogen with two grey methyl groups) attached to the structure.</p>                        |  |
| <p>N,N-dimethyldaunomycin</p> | <p>70095-84-0</p> |  |  <p>A 3D ball-and-stick model of N,N-dimethyldaunomycin. The structure is very similar to N,N-dimethyladriamycin, showing a complex polycyclic core with a central nitrogen atom (blue) bonded to two methyl groups (grey and white). It features multiple hydroxyl groups (red and white) and a dimethylamino group (blue nitrogen with two grey methyl groups).</p> |  |

|                          |                            |  |                                                                                                                                                                                                                                                                                                                                                                       |  |
|--------------------------|----------------------------|--|-----------------------------------------------------------------------------------------------------------------------------------------------------------------------------------------------------------------------------------------------------------------------------------------------------------------------------------------------------------------------|--|
| Doxorubicin / Adriamycin | 25316-40-9 /<br>23214-92-8 |  | 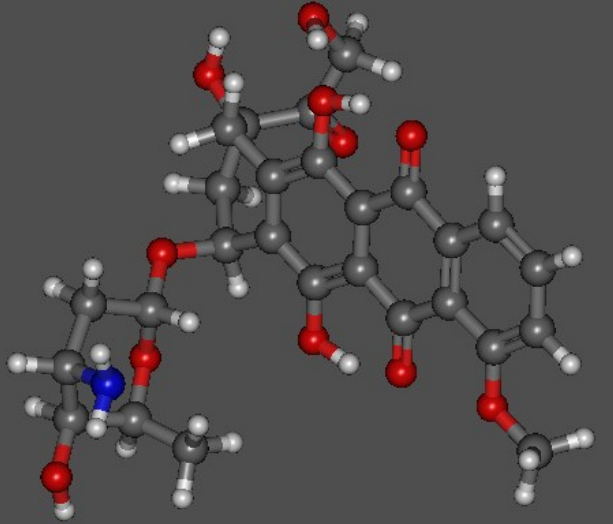 A 3D ball-and-stick model of Doxorubicin / Adriamycin. The molecule features a tetracyclic core with a quinone ring system, a decalin ring system, and a glycosaminoglycan side chain. Atoms are color-coded: carbon (grey), oxygen (red), hydrogen (white), and nitrogen (blue). |  |
| Duborimycin              | NSC 180510                 |  |  A 3D ball-and-stick model of Duborimycin. The molecule features a tetracyclic core with a quinone ring system, a decalin ring system, and a glycosaminoglycan side chain. Atoms are color-coded: carbon (grey), oxygen (red), hydrogen (white), and nitrogen (blue).             |  |



|            |            |  |                                                                                                                                                                                                                                                                                                                                                                                                                                                                                                                                       |  |
|------------|------------|--|---------------------------------------------------------------------------------------------------------------------------------------------------------------------------------------------------------------------------------------------------------------------------------------------------------------------------------------------------------------------------------------------------------------------------------------------------------------------------------------------------------------------------------------|--|
| Epirubicin | 56390-09-1 |  | 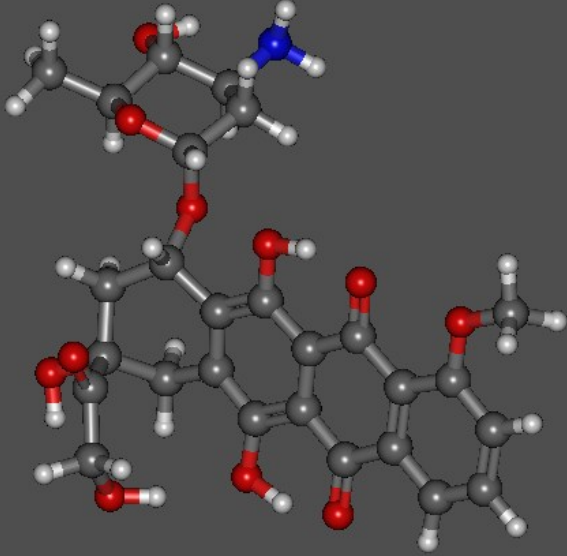 A ball-and-stick model of the Epirubicin molecule. The structure features a central anthracycline ring system with a hydroxyl group at the 12-position and an epirubicin side chain at the 14-position. The side chain includes a methoxy group, a hydroxyl group, and a 4-epi-10-hydroxy-10,11-dihydro-5H-benzo[5,6]cyclohepta[1,2-b]pyridine moiety. Atoms are color-coded: carbon (grey), oxygen (red), hydrogen (white), and nitrogen (blue). |  |
| Esorubicin | 63950-06-1 |  |  A ball-and-stick model of the Esorubicin molecule. The structure is similar to Epirubicin but with the hydroxyl group at the 12-position in the anthracycline ring system in the opposite orientation. The side chain at the 14-position is identical to Epirubicin. Atoms are color-coded: carbon (grey), oxygen (red), hydrogen (white), and nitrogen (blue).                                                                                   |  |

|                                   |                   |  |                                                                                                                                                                                                                                                                                                                                                                                                                                                                                                    |  |
|-----------------------------------|-------------------|--|----------------------------------------------------------------------------------------------------------------------------------------------------------------------------------------------------------------------------------------------------------------------------------------------------------------------------------------------------------------------------------------------------------------------------------------------------------------------------------------------------|--|
| <p>11-Hydroxy aclacinomycin A</p> | <p>NSC 670121</p> |  | 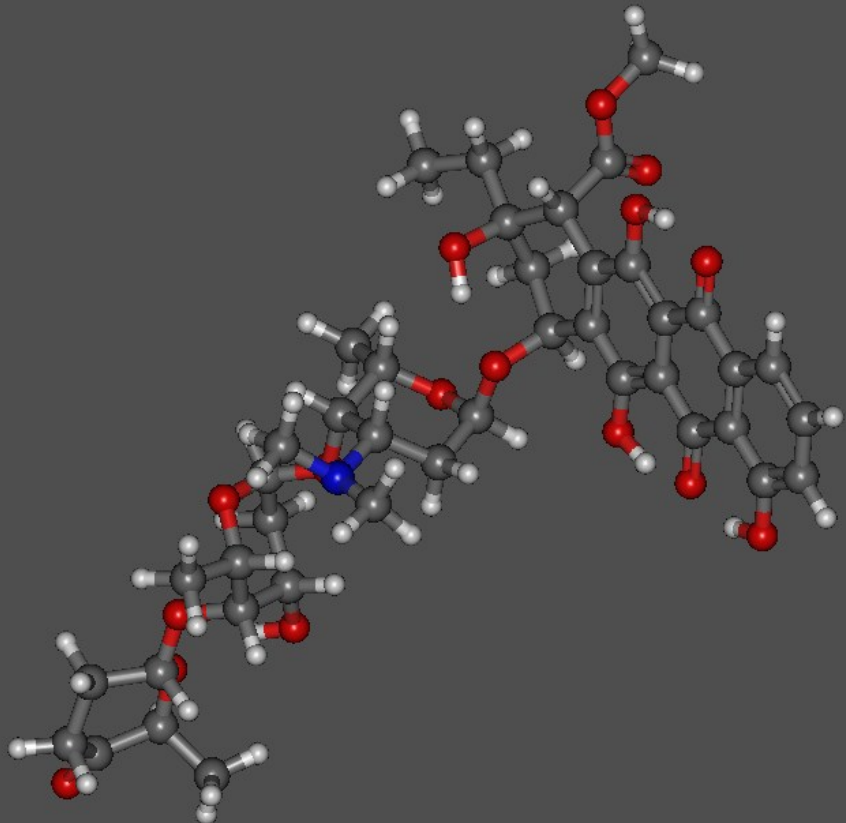 A 3D ball-and-stick model of the molecule 11-Hydroxy aclacinomycin A. The structure is a complex polycyclic molecule with a central nitrogen atom (blue) and several oxygen atoms (red). It features a large, multi-ring system with various substituents, including hydroxyl groups and a methyl group. The model is rendered in a semi-transparent style, showing the spatial arrangement of atoms and bonds. |  |
|-----------------------------------|-------------------|--|----------------------------------------------------------------------------------------------------------------------------------------------------------------------------------------------------------------------------------------------------------------------------------------------------------------------------------------------------------------------------------------------------------------------------------------------------------------------------------------------------|--|

|                                   |                   |                                                                                                                                                                                                                                                                                                                                                                                                                                                                                                                         |
|-----------------------------------|-------------------|-------------------------------------------------------------------------------------------------------------------------------------------------------------------------------------------------------------------------------------------------------------------------------------------------------------------------------------------------------------------------------------------------------------------------------------------------------------------------------------------------------------------------|
| <p>11-Hydroxy aclacinomycin X</p> | <p>NSC 670122</p> | 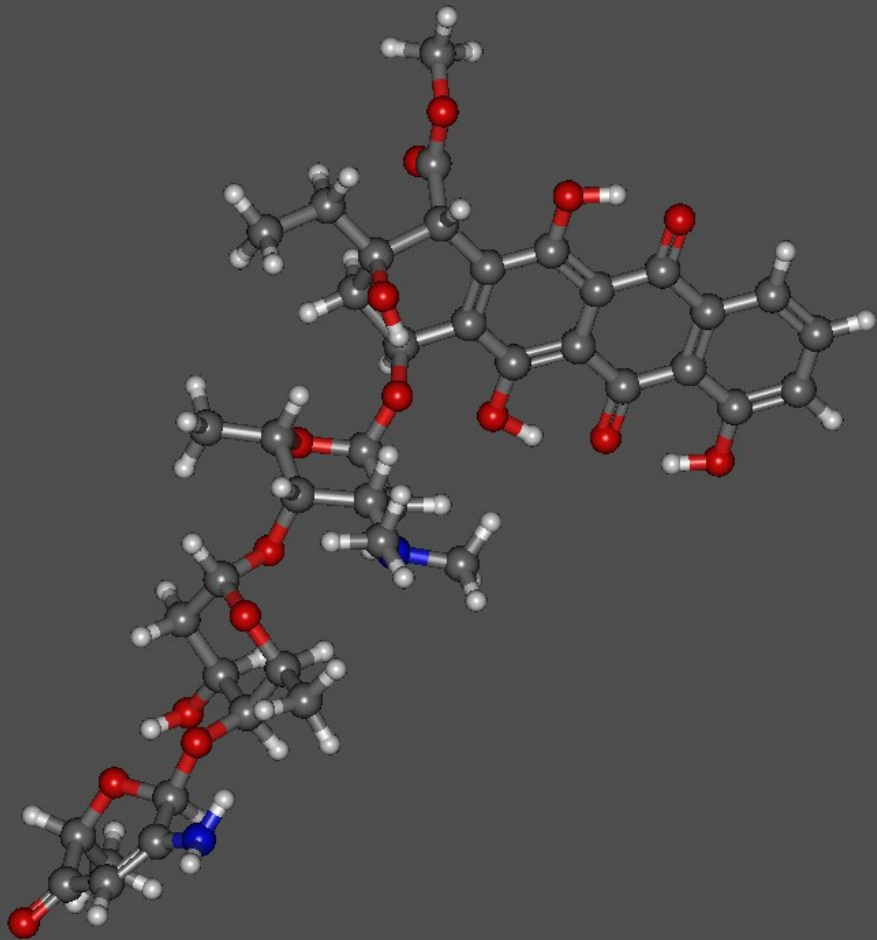 <p>A 3D ball-and-stick model of the molecule 11-Hydroxy aclacinomycin X. The structure is a complex polycyclic molecule with a central core of fused rings, including a pyridine ring. It features several hydroxyl groups (red oxygen atoms with white hydrogen atoms) and a methylamino group (blue nitrogen atom with two white hydrogen atoms). The molecule is shown in a perspective view against a dark gray background.</p> |
|-----------------------------------|-------------------|-------------------------------------------------------------------------------------------------------------------------------------------------------------------------------------------------------------------------------------------------------------------------------------------------------------------------------------------------------------------------------------------------------------------------------------------------------------------------------------------------------------------------|

|                                |                   |  |                                                                                                                                                                                                                                                                                                                                                                 |  |
|--------------------------------|-------------------|--|-----------------------------------------------------------------------------------------------------------------------------------------------------------------------------------------------------------------------------------------------------------------------------------------------------------------------------------------------------------------|--|
| <p>3'-Hydroxy daunorubicin</p> | <p>64842-75-7</p> |  | 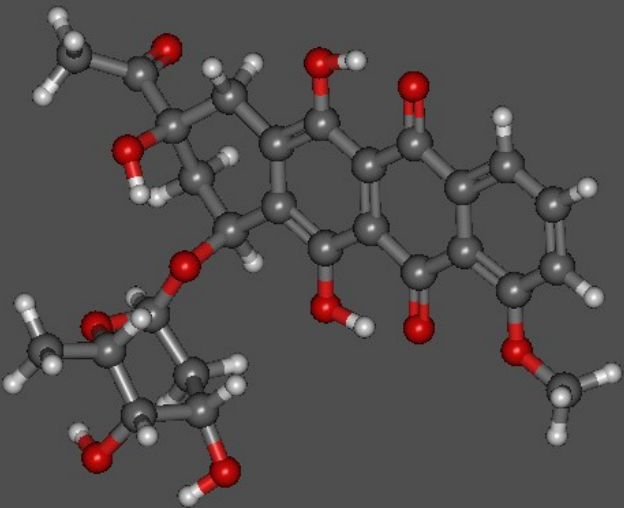 A ball-and-stick model of 3'-Hydroxy daunorubicin. The molecule consists of a tetracyclic anthracycline core with a hydroxyl group at the 3' position of the aglycone moiety. The atoms are color-coded: carbon (grey), oxygen (red), and hydrogen (white).                  |  |
| <p>Idarubicin</p>              | <p>57852-57-0</p> |  |  A ball-and-stick model of Idarubicin. The molecule features a tetracyclic anthracycline core with a hydroxyl group at the 3' position and an imino group at the 4' position. The atoms are color-coded: carbon (grey), oxygen (red), hydrogen (white), and nitrogen (blue). |  |

|                             |                   |  |                                                                                                                                                                                                                                                                                                                                                                                                                                                 |  |
|-----------------------------|-------------------|--|-------------------------------------------------------------------------------------------------------------------------------------------------------------------------------------------------------------------------------------------------------------------------------------------------------------------------------------------------------------------------------------------------------------------------------------------------|--|
| <p>5-Imino daunorubicin</p> | <p>67324-99-6</p> |  | 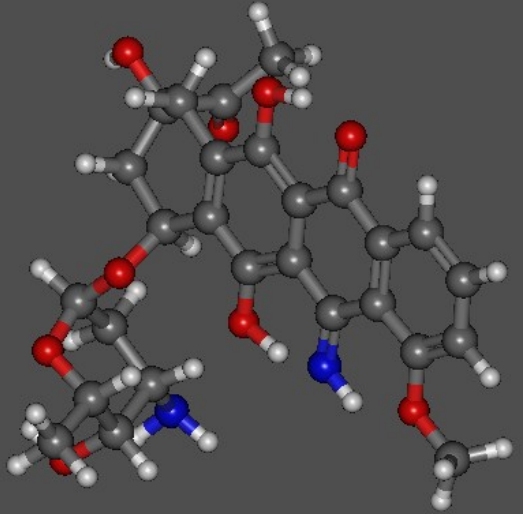 A 3D ball-and-stick model of the molecule 5-Imino daunorubicin. The structure is complex, featuring a central anthracycline-like core with a quinone ring system. It has several hydroxyl groups (red and white spheres) and a characteristic imino group (blue and white spheres) at the 5-position. The model is rendered against a dark gray background. |  |
|-----------------------------|-------------------|--|-------------------------------------------------------------------------------------------------------------------------------------------------------------------------------------------------------------------------------------------------------------------------------------------------------------------------------------------------------------------------------------------------------------------------------------------------|--|

Marcellomycin

63710-10-1

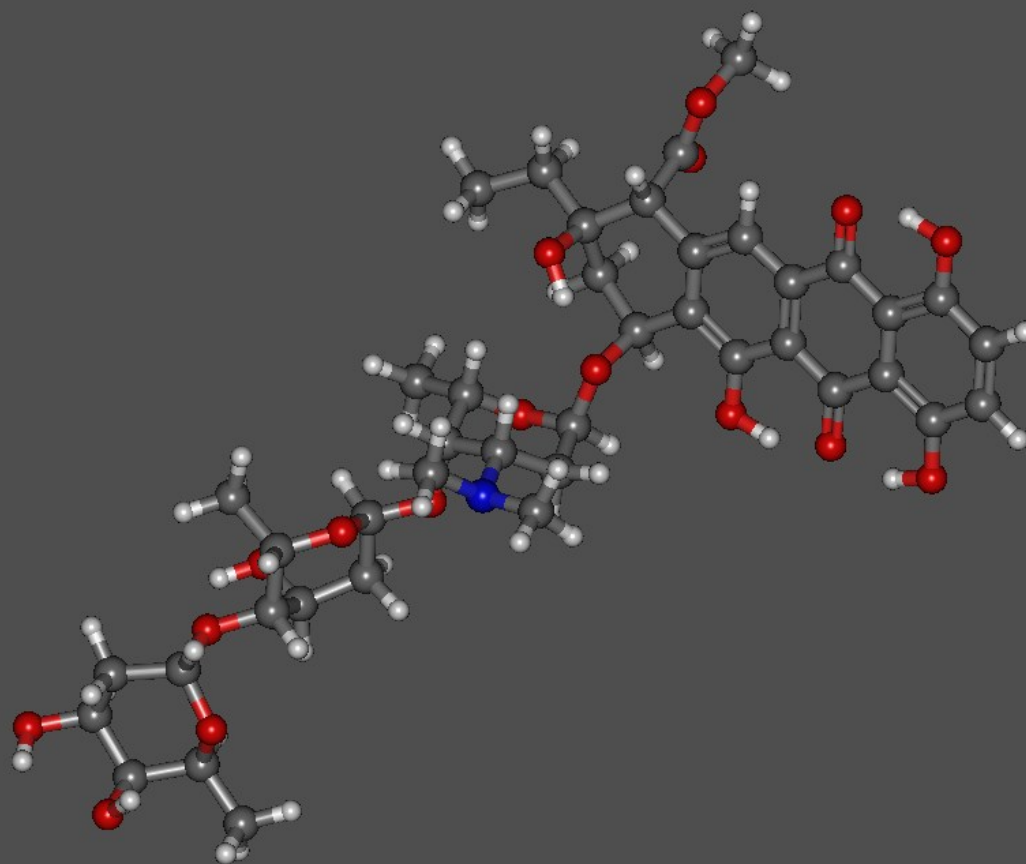

Menogaril

71628-96-1

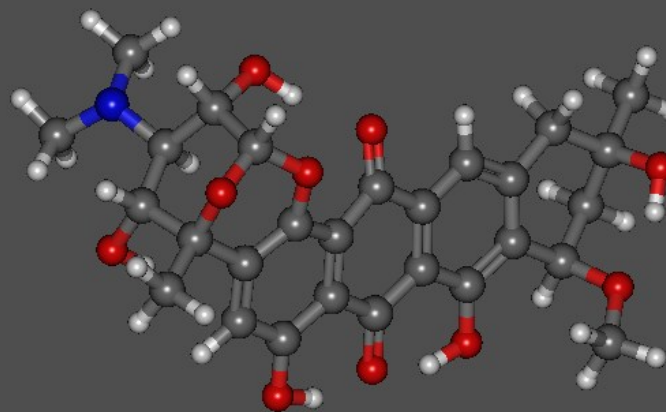

|                               |                   |  |                                                                                                                                                                                                                                                                                                                                                                                                                                                     |  |
|-------------------------------|-------------------|--|-----------------------------------------------------------------------------------------------------------------------------------------------------------------------------------------------------------------------------------------------------------------------------------------------------------------------------------------------------------------------------------------------------------------------------------------------------|--|
| <p>4'-O-methyldoxorubicin</p> | <p>77121-90-5</p> |  | 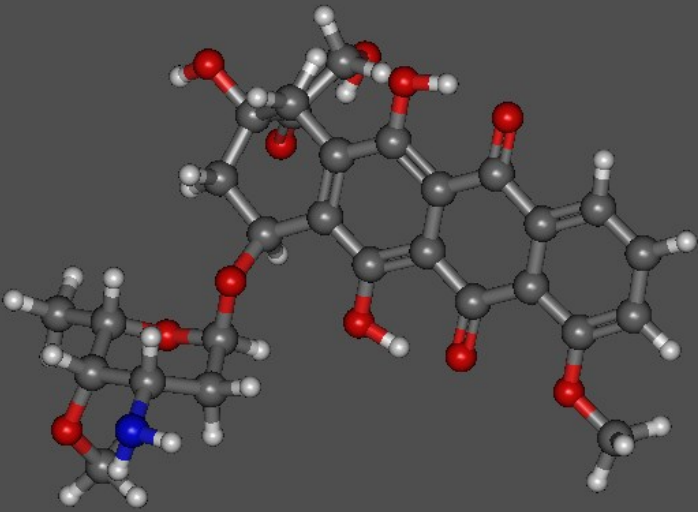 A 3D ball-and-stick model of 4'-O-methyldoxorubicin. The molecule features a tetracyclic core with a morpholine ring at the 4' position. The model uses a color scheme where carbon atoms are grey, oxygen atoms are red, hydrogen atoms are white, and the nitrogen atom in the morpholine ring is blue. The structure is shown against a dark grey background. |  |
| <p>Morpholino adriamycin</p>  | <p>89196-04-3</p> |  |  A 3D ball-and-stick model of Morpholino adriamycin. The molecule features a tetracyclic core with a morpholine ring at the 4' position. The model uses a color scheme where carbon atoms are grey, oxygen atoms are red, hydrogen atoms are white, and the nitrogen atom in the morpholine ring is blue. The structure is shown against a dark grey background. |  |

|            |                            |  |                                                                                                                                                                                                                                                                                                                                                                                          |  |
|------------|----------------------------|--|------------------------------------------------------------------------------------------------------------------------------------------------------------------------------------------------------------------------------------------------------------------------------------------------------------------------------------------------------------------------------------------|--|
| MX2        | NCI 619003                 |  | 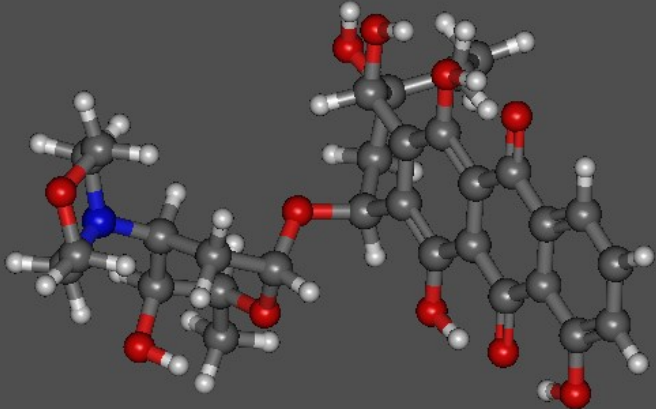 A ball-and-stick molecular model of NCI 619003. The structure features a central benzene ring with a nitrogen atom (blue) and a carbonyl group (C=O) attached to one side, and a complex side chain containing multiple oxygen atoms (red) and carbon atoms (grey) extending from the other side.     |  |
| NSC 286628 | NSC 286628 /<br>67903-59-7 |  |  A ball-and-stick molecular model of NSC 286628. The structure consists of a central benzene ring with a nitrogen atom (blue) and a carbonyl group (C=O) attached to one side, and a complex side chain containing multiple oxygen atoms (red) and carbon atoms (grey) extending from the other side. |  |



Nogalamycin

1404-15-5

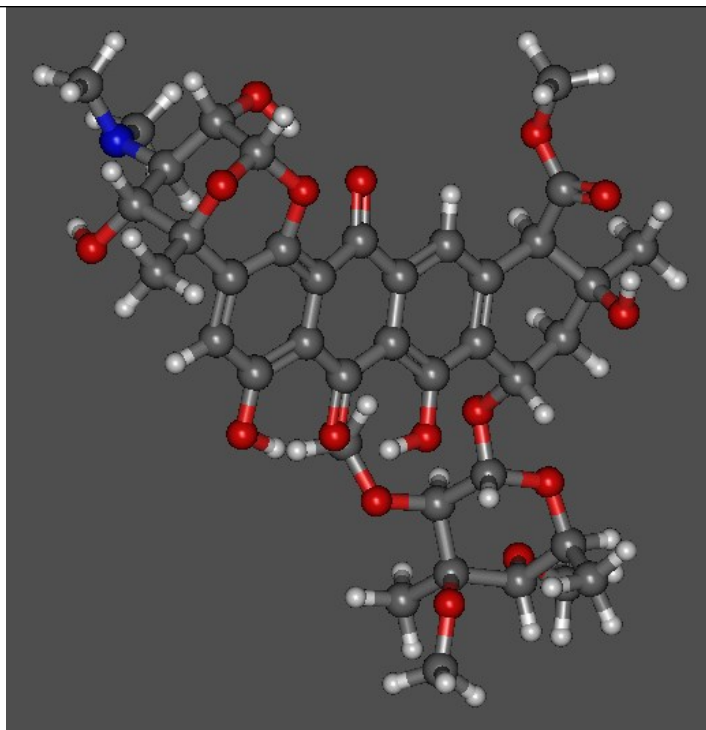

Pirarubicin

72496-41-4

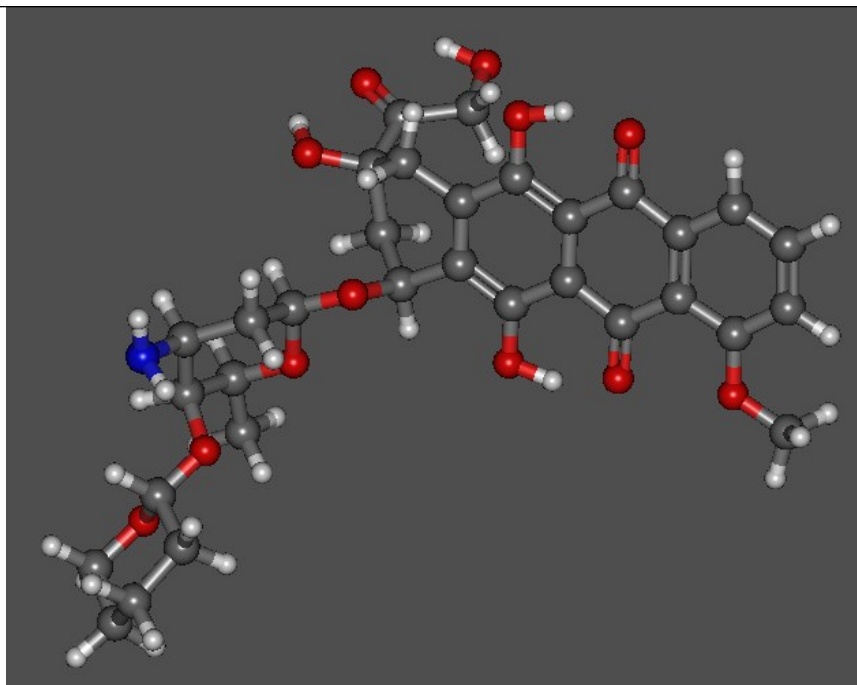

Pyrrromycin

668-17-7

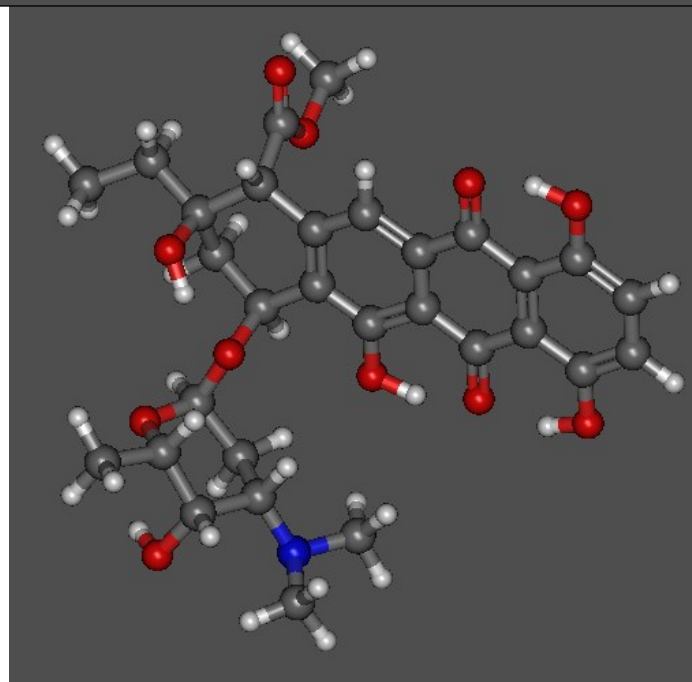

|               |            |  |                                                                                                                                                                                                                                                                                                                                                                                                                               |  |
|---------------|------------|--|-------------------------------------------------------------------------------------------------------------------------------------------------------------------------------------------------------------------------------------------------------------------------------------------------------------------------------------------------------------------------------------------------------------------------------|--|
| Rhodomycinone | 21288-60-8 |  | 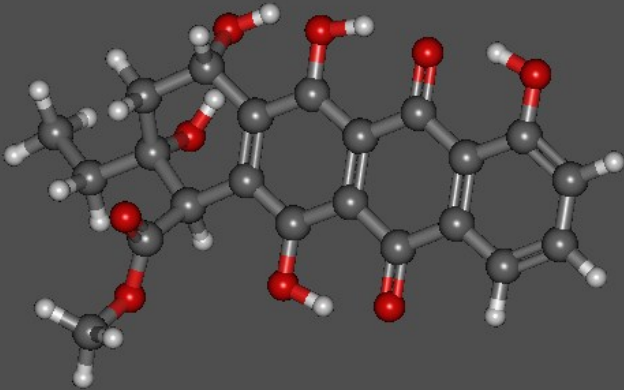 A 3D ball-and-stick model of Rhodomycinone, a polyketide. The structure features a long, zig-zagging chain of carbon atoms (grey) with several oxygen atoms (red) and hydrogen atoms (white) attached. The chain is relatively flat and extends horizontally across the frame.                                                             |  |
| Steffimycin   | 11033-34-4 |  |  A 3D ball-and-stick model of Steffimycin, a polyketide. The structure is more complex and folded than Rhodomycinone, with a zig-zagging carbon chain (grey) and numerous oxygen (red) and hydrogen (white) atoms. The molecule is oriented diagonally, with one end pointing towards the top-left and the other towards the bottom-right. |  |

|               |            |                                                                                                                                                                                                                                                                                                                                                                                                                                                         |
|---------------|------------|---------------------------------------------------------------------------------------------------------------------------------------------------------------------------------------------------------------------------------------------------------------------------------------------------------------------------------------------------------------------------------------------------------------------------------------------------------|
| Steffimycin B | NCI 204856 | 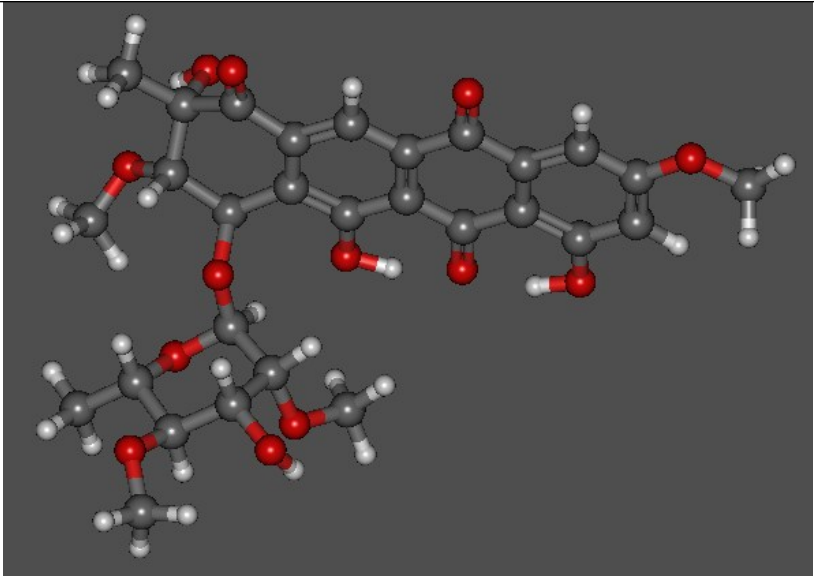 A 3D ball-and-stick model of Steffimycin B, a complex polyketide. The molecule features a long, zig-zagging carbon backbone with several hydroxyl groups (red oxygen, white hydrogen) and a methyl group (grey carbon, three white hydrogens) attached. The structure is shown against a dark grey background.                                                        |
| Theprubicin   | 95343-20-7 |  A 3D ball-and-stick model of Theprubicin, a complex polyketide. The molecule features a long, zig-zagging carbon backbone with several hydroxyl groups (red oxygen, white hydrogen) and a methyl group (grey carbon, three white hydrogens) attached. A blue nitrogen atom is also present in the structure. The structure is shown against a dark grey background. |

Valrubicin

56124-62-0

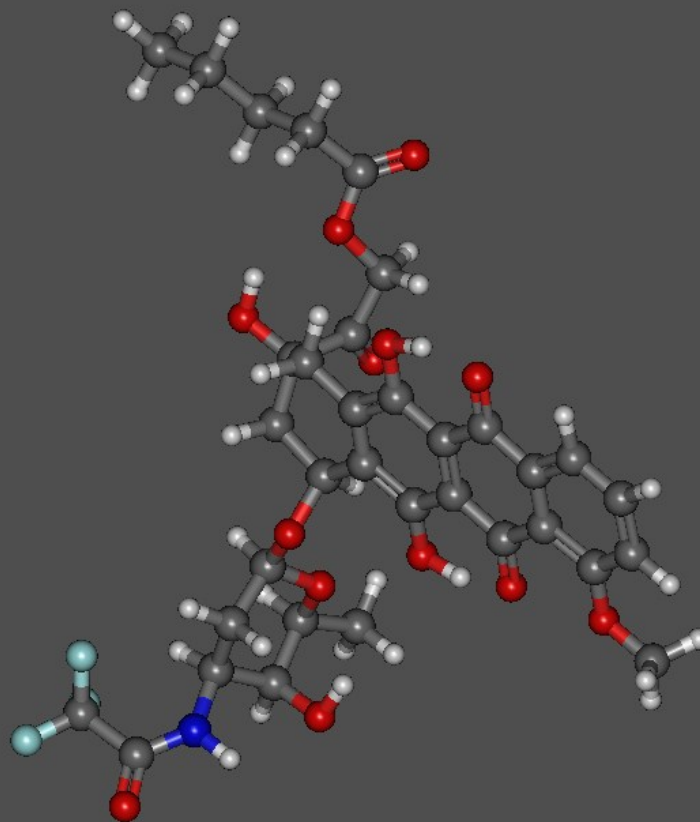

Zorubicin / Rubidazone

36508-71-1

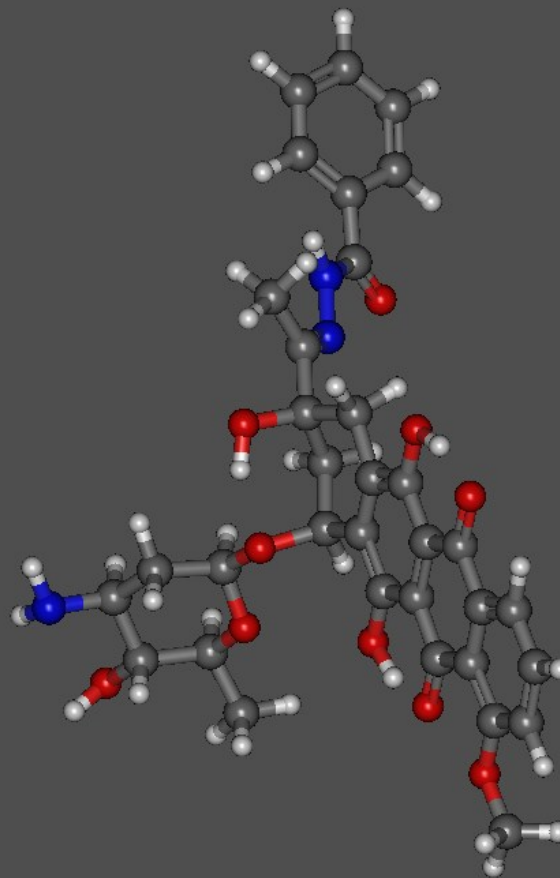

9. Plots of polarizability ( $\alpha$ ), dispersion interaction ( $-\frac{\alpha_1\alpha_2}{d^6} \frac{I_1 I_2}{I_1 + I_2}$ ), dipole-dipole interaction ( $-\frac{\mu_1\mu_2}{d^3}$ ), dipole-induced dipole interaction ( $-\frac{\mu_1^2\alpha_2 + \mu_2^2\alpha_1}{d^6}$ ), and energy change for the one-electron reduction ( $E_{Q+\epsilon^- \rightarrow Q^{\cdot-}}$ ) of anthracyclines against log GI<sub>50</sub> for K562 leukemia.

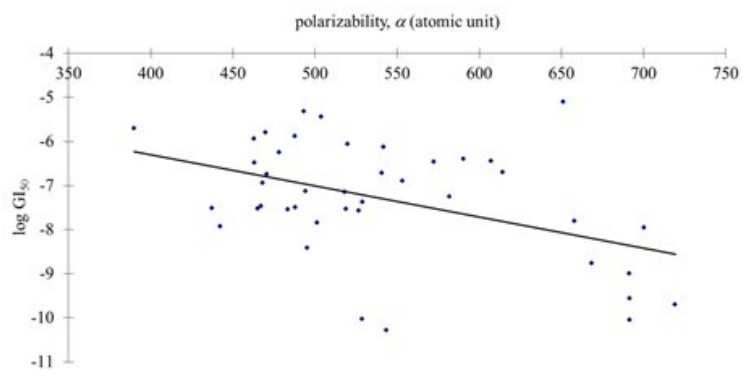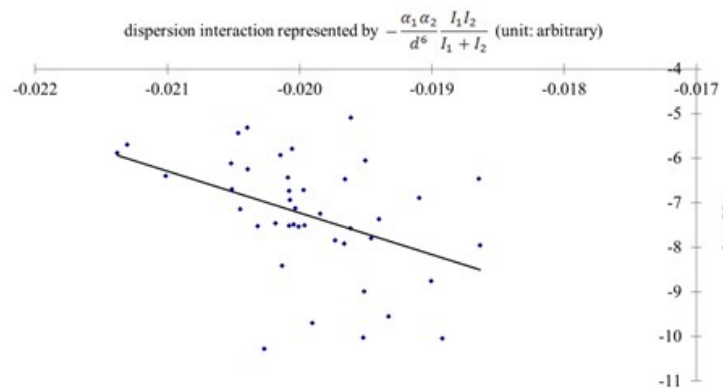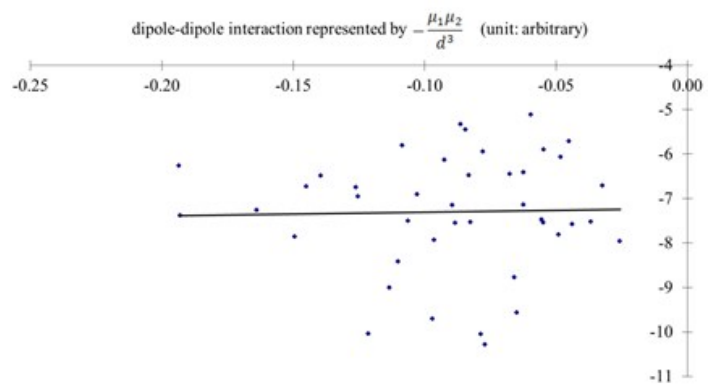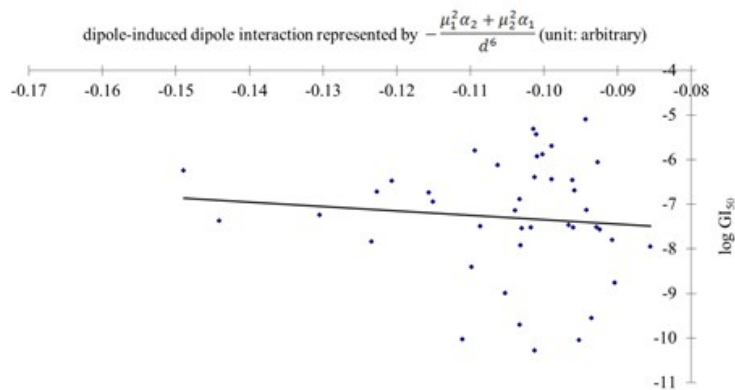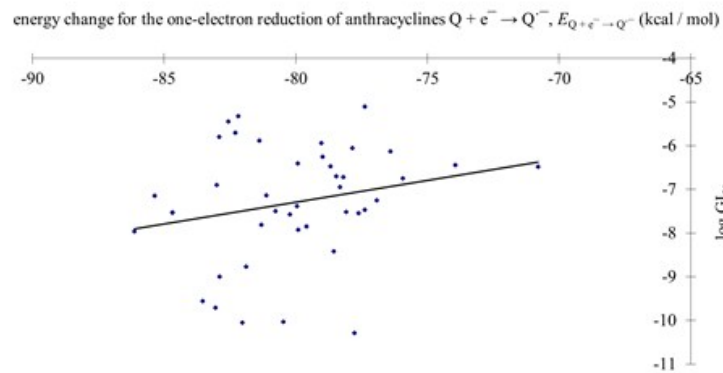

Representative Firefly inputs used in the study

1. Geometry optimization of one of anthracyenes



```
$CONTRL RUNTYP=Optimize $END
$CONTRL SCFTYP=RHF $END
$CONTRL DFTTYP=B3LYP1 $END
$CONTRL ICHARG=0 MULT=1 $END
$CONTRL NZVAR=267 $END
$ZMAT DLC=.T. AUTO=.T. $END
$BASIS GBASIS=N31 NGAUSS=6 $END
$BASIS NDFUNC=1 NPFUNC=1 $END
$SCF DIRSCF=.TRUE. NCONV=9 $END
$$SYSTEM TIMLIM=30000 MWORDS=100 $END
$STATPT NSTEP=200 $END
```

\$DATA

Molecule specification

C1

```
H      1.0  5.8918845272  1.1063231062 -1.7508609126
O      8.0  6.4309807628 -1.3853261070 -1.5039537114
H      1.0  4.2130010362  0.8719841807 -1.2214052890
C      6.0  5.2597672369  0.6736829267 -0.9707811073
```

...

...

...

\$END

2. Calculation of HOMO of one of anthracyclines with taking the solvation into account

```
$CONTRL RUNTYP=Energy $END
$CONTRL SCFTYP=RHF MAXIT=200 $END
$CONTRL ICHARG=0 MULT=1 $END
$SCF DIRSCF=.TRUE. NCONV=9 $END
$$SYSTEM TIMLIM=30000 MWORDS=100 $END
$BASIS EXTFIL=.T. GBASIS=cc-pvdz $END
$PCM SOLVNT=WATER $END
$DATA
```

Molecule specification

C1

```
H      1.0  5.8918845272  1.1063231062 -1.7508609126
O      8.0  6.4309807628 -1.3853261070 -1.5039537114
H      1.0  4.2130010362  0.8719841807 -1.2214052890
C      6.0  5.2597672369  0.6736829267 -0.9707811073
```

...

...

...

\$END

3. Calculation of dipole moment and polarizability of one of anthracyclines with taking the solvation into account

```
$CONTRL RUNTYP=TDHF NOSYM=1 $END
$CONTRL SCFTYP=RHF MAXIT=200 $END
$CONTRL DFTTYP=B3LYP1 $END
$CONTRL ICHARG=0 MULT=1 $END
$CONTRL INTTYP=HONDO ICUT=11 ITOL=30 $END
$SCF DIRSCF=.TRUE. NCONV=9 $END
$SYSTEM TIMLIM=3000 MWORDS=100 $END
$BASIS GBASIS=N31 NGAUSS=6 $END
$BASIS NDFUNC=1 NPFUNC=1 $END
$PCM SOLVNT=WATER $END
```

```
$DATA
```

```
Molecule specification
```

```
C1
```

|   |     |              |               |               |
|---|-----|--------------|---------------|---------------|
| H | 1.0 | 5.8918845272 | 1.1063231062  | -1.7508609126 |
| O | 8.0 | 6.4309807628 | -1.3853261070 | -1.5039537114 |
| H | 1.0 | 4.2130010362 | 0.8719841807  | -1.2214052890 |
| C | 6.0 | 5.2597672369 | 0.6736829267  | -0.9707811073 |

```
...
```

```
...
```

```
...
```

```
$END
```
